# Supplementary material
Source: Research Square preprint supplement (doi:10.21203/rs.3.rs-8000899/v1)

## Supplementary Figure Legends

### **Supplementary Figure 1: Cross-tissue analysis of accessible chromatin with eGFR<sub>crea</sub>-associated variants**

a) Fraction of overlap of 35,881 variants associated with eGFR across 29 tissues. 3,304 variants from 471 independent genetic signals overlap with accessible chromatin. **b)** Cumulative number of eGFR<sub>crea</sub>-associated variants and signals overlapping accessible chromatin in the respective tissue. **c)** Number of variants per tissue that co-occur with chromatin uniquely accessible in the respective tissue

### **Supplementary Figure 2: Cross-tissue analysis of the top 50,000 REs per tissue with PPA-filtered eGFR<sub>crea</sub> variants**

a) Cumulative number of PPA-filtered eGFR<sub>crea</sub>-associated variants and signals co-occurring with open chromatin in the top 50,000 REs for each tissue. **b)** Number of PPA-filtered variants in chromatin uniquely accessible in the top 50,000 REs in the respective tissue.

### **Supplementary Figure 3: Refinement of eGFR<sub>crea</sub> association signals at accessible chromatin by using additional kidney function biomarkers**

Cumulative number of genetic eGFR signals across accessible chromatin in the 29 tissues stratified according to their association with eGFR<sub>crea</sub> alone (eGFR<sub>crea</sub> only) or eGFR<sub>crea</sub> with additional validation by cystatin C and/or blood urea nitrogen (eGFR<sub>crea</sub>/eGFR<sub>cys</sub> and/or BUN validated).

### **Supplementary Figure 4: Proportion of eGFR variants in accessible chromatin of the kidney or PTC according to PPA value.**

a) and b) Proportion of RE-positive variants against the PPA level in a) PTC or b) kidney according to their association with eGFR<sub>crea</sub> alone (eGFR<sub>crea</sub> only) (light blue dots) or eGFR<sub>crea</sub> with additional validation by cystatin C and/or blood urea nitrogen (eGFR<sub>crea</sub>/eGFR<sub>cys</sub> and/or BUN) (dark blue triangle). rs77924615 has a PPA of 100% (two variants with 100% in the set) and overlaps accessible chromatin in both samples (PTC and kidney).

**Supplementary Figure 5: Activity-by-contact (ABC) model predicts enhancer-promoter interactions at eGFR associated loci**

**a)** and **b)** Genomic locus of the *TCEA2* and *RGS19* genes. Indicated are eGFR<sub>crea</sub> variants, eQTL variants (tub/int, tubulointerstitial compartment of the kidney from Hu et al.), H3K27ac ChIP-seq as well as ATAC-seq from PTC derived from the same individual (donor 2 in **a**) and donor 3 in **b**). The ABC model suggests interactions of the variant-carrying RE with both promoters (dark magenta). The SNPs rs6062343 and rs6062344 are eQTLs for *RGS19* in the tubulo-interstitial compartment of the kidney.

**Supplementary Figure 6: HNF-1 $\beta$  CUT &Tag-seq and HNF-1 $\beta$  binding at rs77924615 within the *UMOD/PDILT* locus**

**a)** Venn plot depicting overlap of HNF-1 $\beta$  binding sites between the five different PTC HNF-1 $\beta$  CUT&Tag-seq experiments. **b)** HNF-1 $\beta$  CUT&Tag-seq tracks at the *UMOD/PDILT* gene locus generated from PTC from five individual donors (a-e). ATAC-seq from one PTC experiment and HNF-1 $\beta$  ChIP-seq from one PTC experiment are shown for comparison. eGFR<sub>crea</sub> and eQTL variants are indicated (tub/int, tubulointerstitial compartment of the kidney from Hu et al.). rs77924615 is an eQTL for *UMOD* in the tubule-interstitial compartment as defined by Han et al. **c)** Bar plot depicting the percent of variant-carrying and HNF-1 $\beta$ -associated REs from PTC co-incided with accessible chromatin across the 29 tissues. Overlap of REs with variants containing HNF-1 $\beta$  motifs (dark blue) or containing HNF-1 $\beta$  motifs and intersecting HNF-1 $\beta$  binding (light blue) are shown across the 29 tissues.

**Supplementary Figure 7: HNF-1 $\beta$  binding at a polymorphic RE next to the *NDRG1* promoter**

**a)** and **b)** Sequencing tracks from HNF-1 $\beta$  and H3K27ac CUT&Tag-seq as well as ATAC-seq performed in PTC (donor 2 in **a**) and donor 3 in **b**) at the rs10283362-*NDRG1* locus. Activity-by-contact (ABC) analysis was used to predict promoter-enhancer interactions. eGFR<sub>crea</sub> associated and eQTL variants (tub/int, tubulointerstitial compartment of the kidney from Hu et al.) are indicated.

**Supplementary Figure 8: HNF-1 $\beta$  binding at the *NDRG1* enhancer**

**a)** HNF-1 $\beta$  CUT&Tag-seq tracks at the *NDRG1* gene locus generated from PTC from five individual donors. ATAC-seq from one PTC experiment and HNF-1 $\beta$  CHIP-seq from one PTC experiment are shown for comparison. **b)** ATAC-seq from one PTC experiment and single nucleus ATAC-seq (snATAC-seq) data in different compartments of the kidney (Muto, Y. et al. Nat Commun 12, 2190; 2021). Proximal convoluted tubules (PCT) are accessible at the *NDRG1* enhancer containing rs10283362.

**Supplementary Figure 9: rs10283362-associated enhancer regulates *NDRG1* gene expression in PTC**

**a)** Schematic of the *NDRG1* locus, the candidate cis-regulatory element (cCRE) with variant rs10283362 and the position of the single guide RNA (sgRNA) used for CRISPR/Cas9 experiments. **b)** *NDRG1* mRNA expression in PTC after CRISPR/Cas9-mediated knock-out of the rs10283362 carrying sequence (KO) compared to non-targeting sgRNA transfected cells (Ctrl.). Data was from six independent donors, was normalized on values from one sample from Ctrl.1, and is shown in mean +/- SD. Ordinary one-way ANOVA for multiple comparisons was performed; \*\*, p<0.01. **c)** *NDRG1* protein expression in control and *NDRG1* enhancer knock-out cells from a representative experiment.

**Supplementary Figure 10: Sanger sequencing of HK-2 *NDRG1* enhancer knock-out cells**

**a)** and **b)** Sanger sequencing tracks from HK-2 Ctrl. vs. KO cells of clones (KO1 in a) and KO2 in b)) were analyzed using Sanger sequencing to identify mutations. The sgRNA binding site is highlight as a black line in the control sequence.

**Supplementary Figure 11: Knock-out of the rs10283362 carrying sequence in the *NDRG1* enhancer leads to reduced HNF-1 $\beta$  binding and enhancer activity at this locus**

HNF-1 $\beta$  and H3K27ac CUT&Tag-seq tracks from HK-2 ctrl. (Ctrl. 1, blue) and *NDRG1* enhancer KO cells (KO 1, turquoise). Shown are the *NDRG1* promoter, the *NDRG1* enhancer (red box) and the HNF-1 $\beta$  binding control locus *FXD2*.

**Supplementary Figure 12: *NDRG1* enhancer knock-out clone 2 reveals a defective migration behavior**

a) Representative pictures of HK-2 Ctrl. 2 vs. *NDRG1* enhancer KO clone 2 from the wound healing assay at the timepoints 0 and 12 hours. b) Cell tracking analysis from wound healing assay of 60 individual cells of clones (Ctrl. 2 and KO 2) shows the route migrated by each cell over a duration of 12 hours.

**Supplementary Figure 13: Knock-out of exon 2 of the *NDRG1* gene shows comparable effects to *NDRG1* enhancer knock-out clones of cells**

a) Schematic of the *NDRG1* locus with the first two exons, the candidate cis-regulatory element (cCRE) (green) with variant rs10283362 (red) and the position of the single guide RNA (sgRNA) in exon 2 used for CRISPR/Cas9 experiments. b) *NDRG1* protein expression in the two control clones and the *NDRG1* exon knock-out clone of HK-2 cells (*NDRG1* exKO) reveals knock-out of the protein. c) Sanger sequencing tracks from HK-2 Ctrl. vs. *NDRG1* exKO clones of cell to verify the knock-out results. The sgRNA binding site is highlight as a black line in control sequence. d) Volcano plot from RNA-seq experiments in HK-2 *NDRG1* exon knock out vs. intact enhancer control clones of cells. e) GO Hallmark analysis of down- or upregulated genes from the RNA-seq experiment (*NDRG1* exKO vs Ctrl.) using Metascape platform. DEGs were based on adjusted p-value < 0.05 and  $\log_2(\text{fold change}) \geq \log_2(0.5)$  or  $\leq \log_2(-0.5)$ . f) Proliferation assay of control (blue) and *NDRG1* exKO (purple) clones of cells using an MTS assay (n=6; with three replicates each). Multiple, unpaired t-test was performed; \*, p< 0.05; \*\*, p<0.01. g) Wound healing assay of control and *NDRG1* exKO cells of clone imaged in a live cell imaging experiment. Depicted is the percentage of closure of the gap over time [h]. Data (n=8) shown in mean +/- SD. Two-way ANOVA for multiple comparisons was performed; \*, p< 0.05; \*\*\*, p< 0.001; p< \*\*\*\*, p<0.0001. h) Representative pictures of control vs. *NDRG1* exon KO cells of clone from the wound healing assay at the timepoints 0 and 12 hours. i) Cell tracking from wound healing assay of 60 individual cells (Ctrl. 1 and *NDRG1* exKO) shows the route migrated by each cell over a duration of 12 hours. j) Accumulated distance [ $\mu\text{m}$ ] for each of the 60 cells (Ctrl. 1, Ctrl.2, *NDRG1* exKO) over 12 hours. k) Corresponding Euclidean distance [ $\mu\text{m}$ ] of the Ctrl. and *NDRG1* exKO cells. l) Velocity [ $\mu\text{m}/\text{min}$ ] for Ctrl. 1, Ctrl.2, *NDRG1* exKO cells in the migration assay. m) Directional migration of the cells (Ctrl. and

*NDRG1* exKO). Whereby a value of 1 represents a linear movement, a value less than 1 indicates an undirected migration. Data shown in mean +/- SD. Ordinary one-way ANOVA for multiple comparisons was performed; \*,  $p < 0.05$ ; \*\*\*,  $p < 0.001$ ; \*\*\*\*,  $p < 0.0001$ .

# Supplementary Figure 1

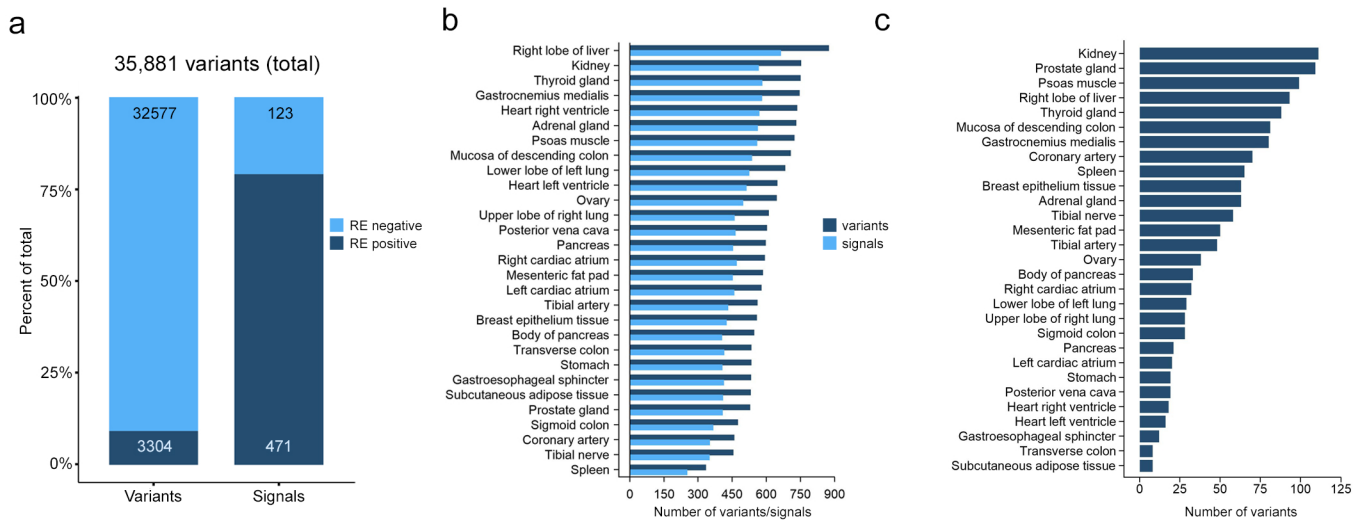

# Supplementary Figure 2

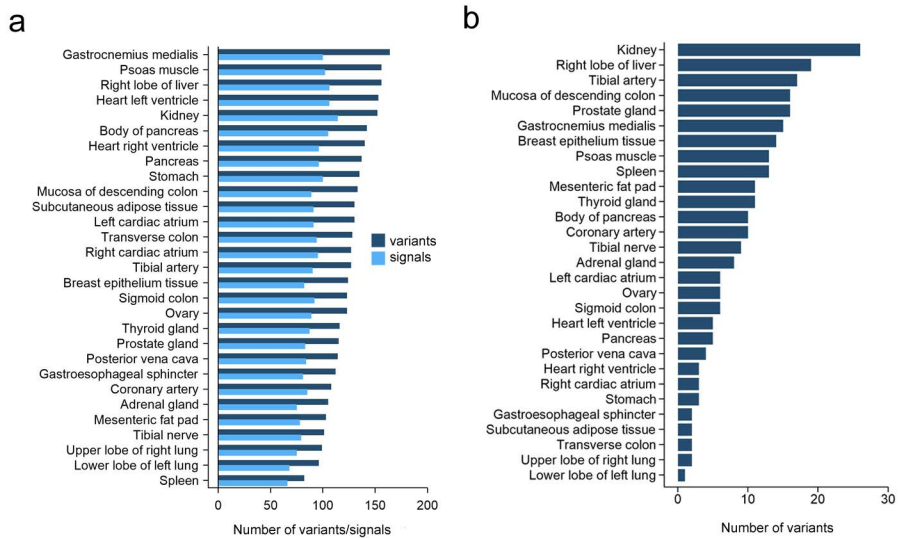

# Supplementary Figure 3

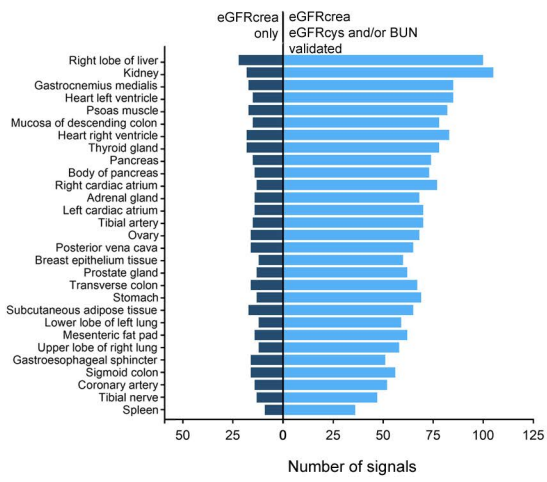

# Supplementary Figure 4

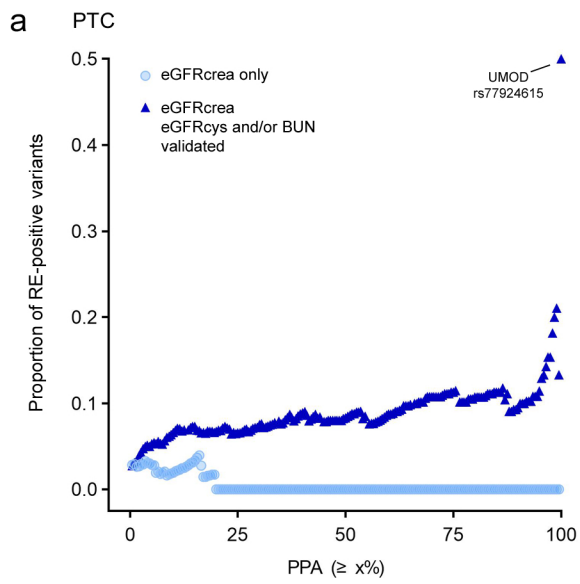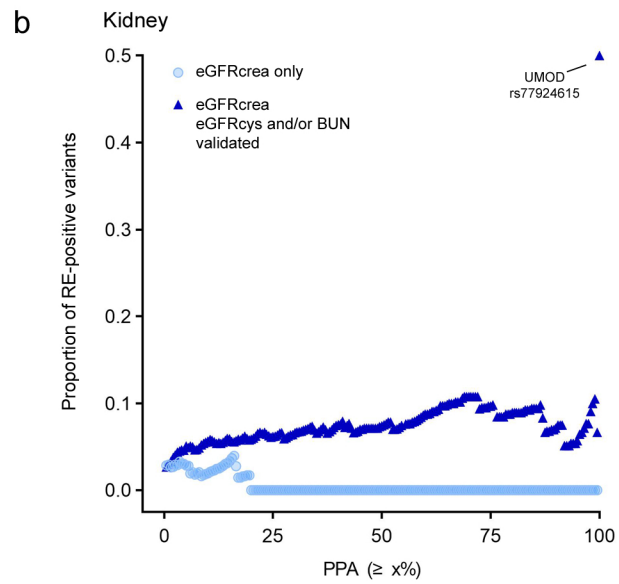

# Supplementary Figure 5

a

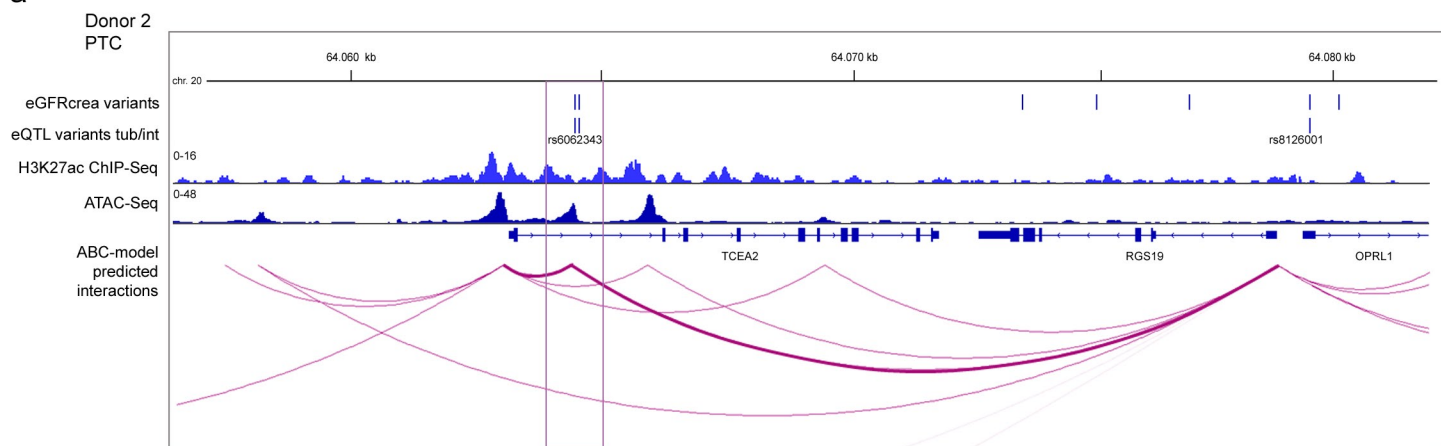

b

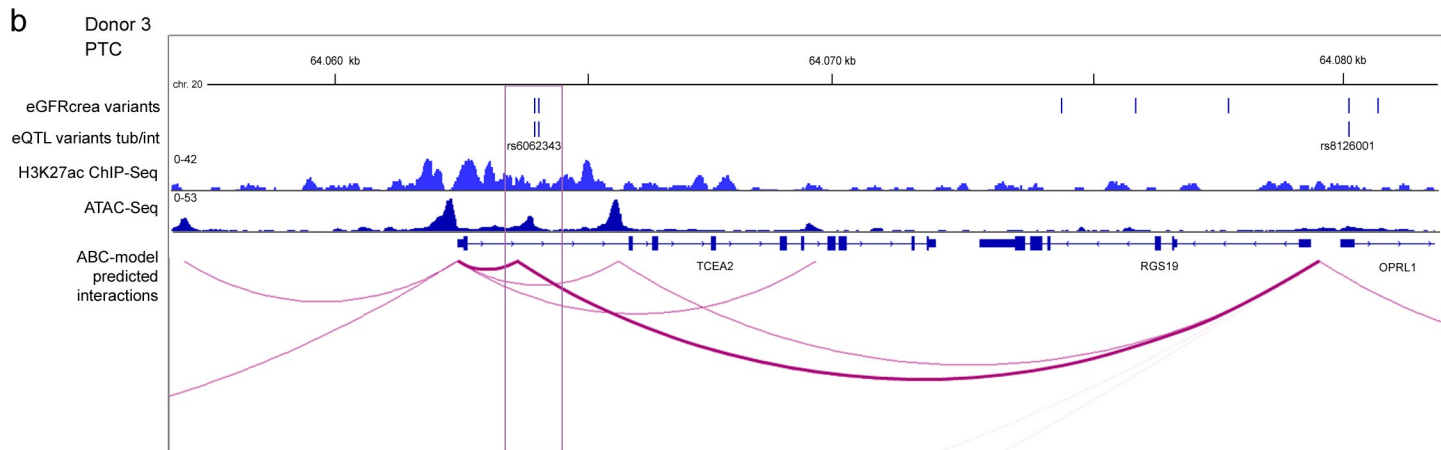

# Supplementary Figure 6

a

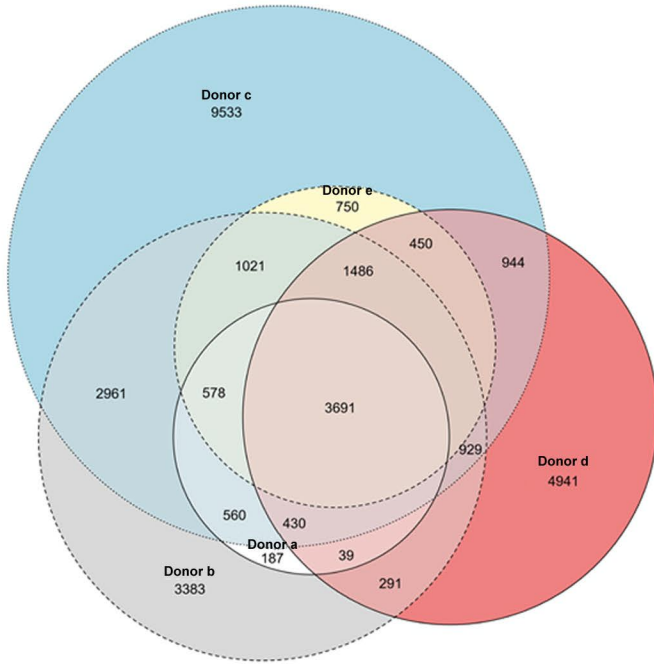

b

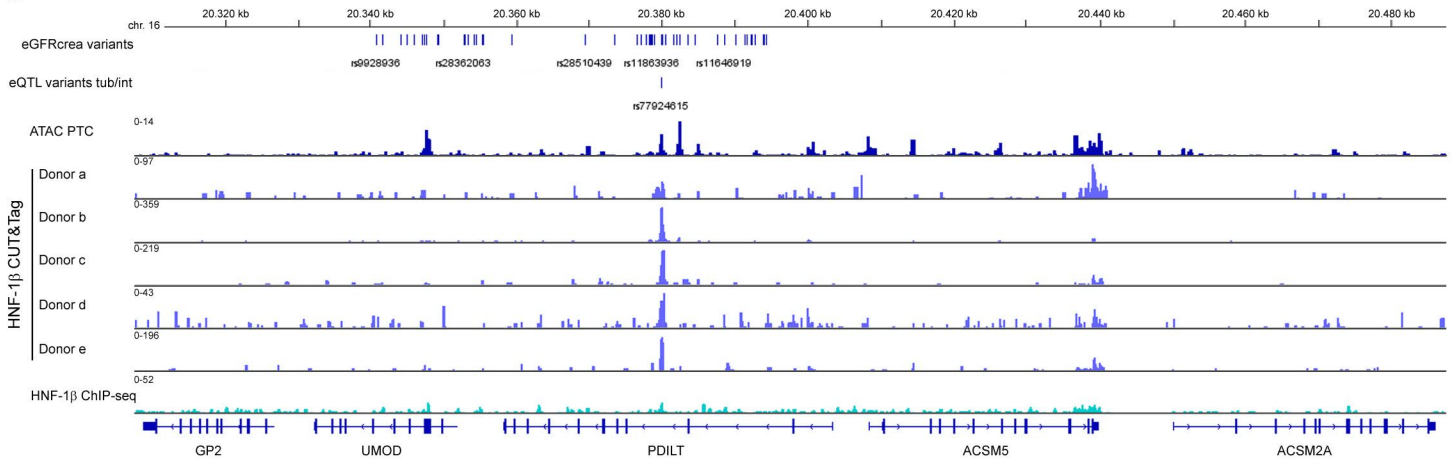

c

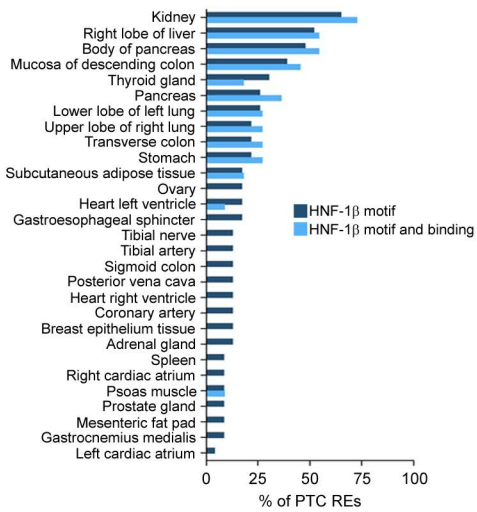

# Supplementary Figure 7

a

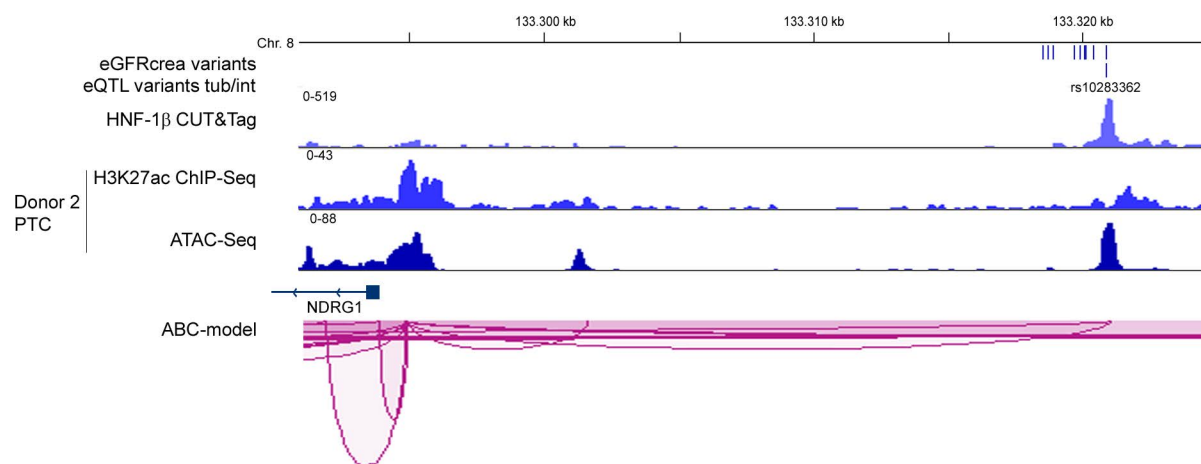

b

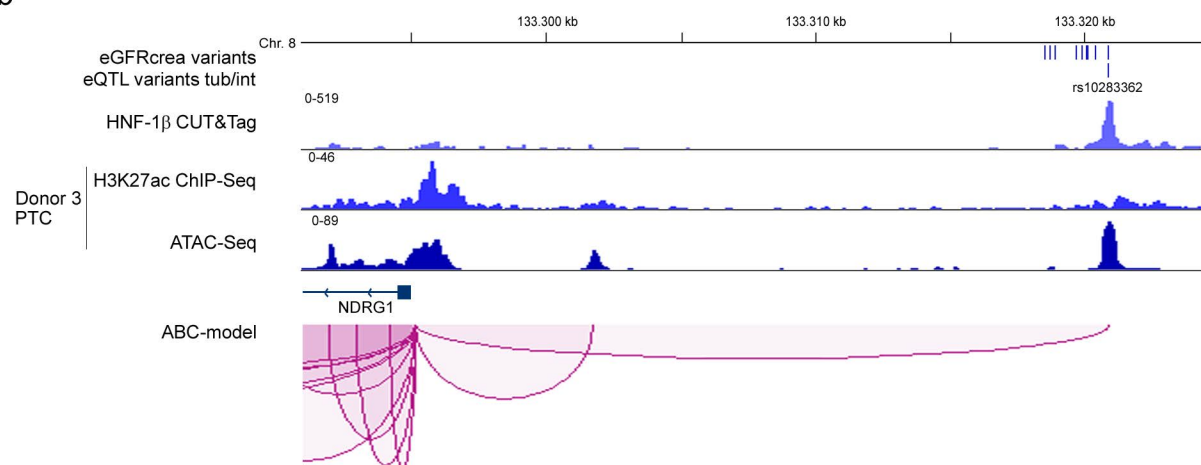

# Supplementary Figure 8

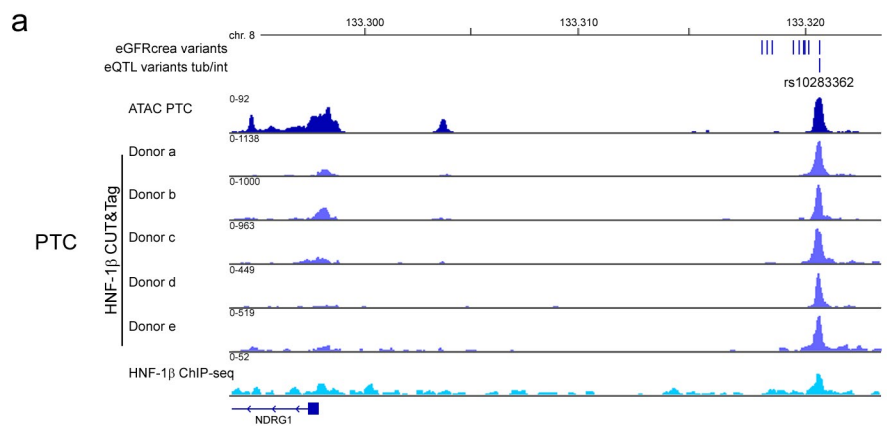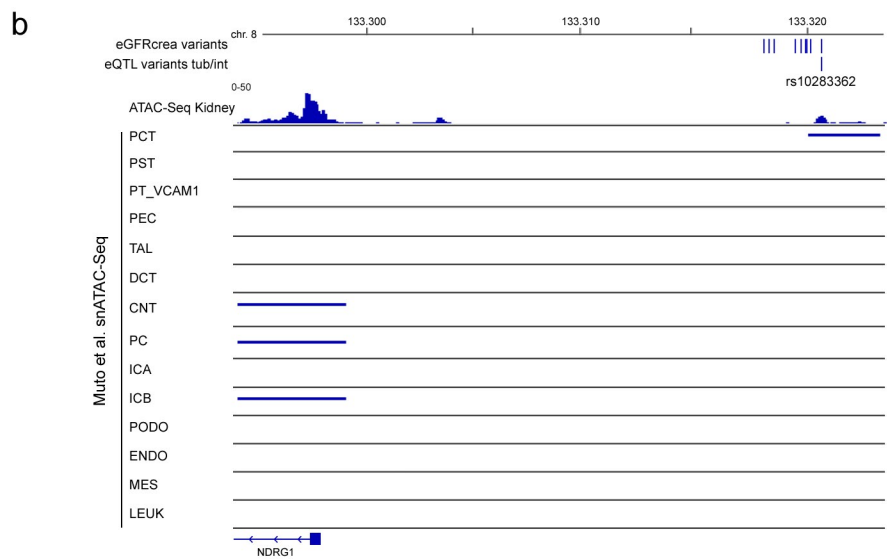

# Supplementary Figure 9

a

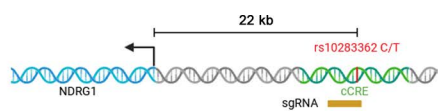

b

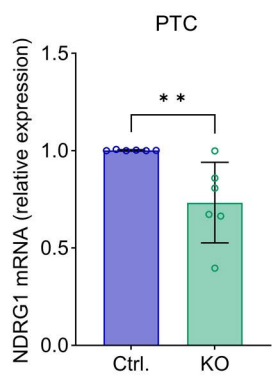

c

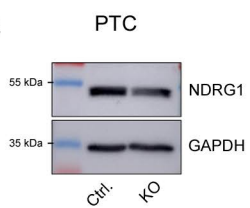

# Supplementary Figure 10

## a HK-2 KO 1 vs. Ctrl.

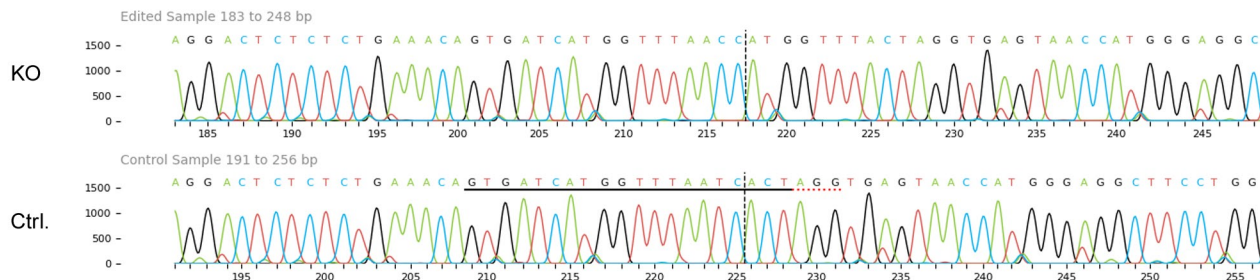

## b HK-2 KO 2 vs. Ctrl.

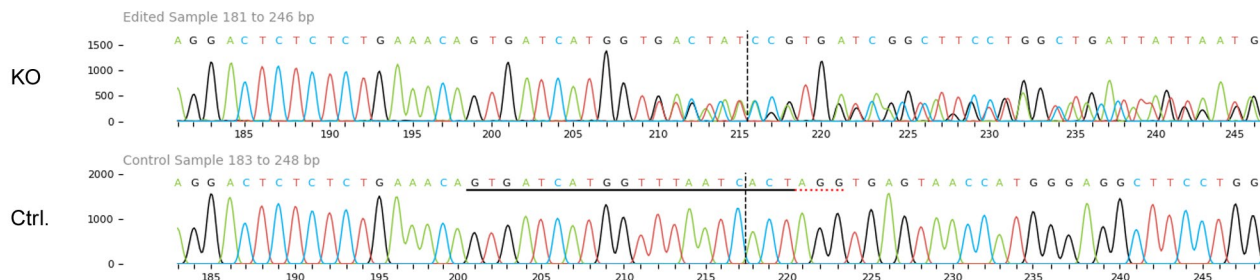

# Supplementary Figure 11

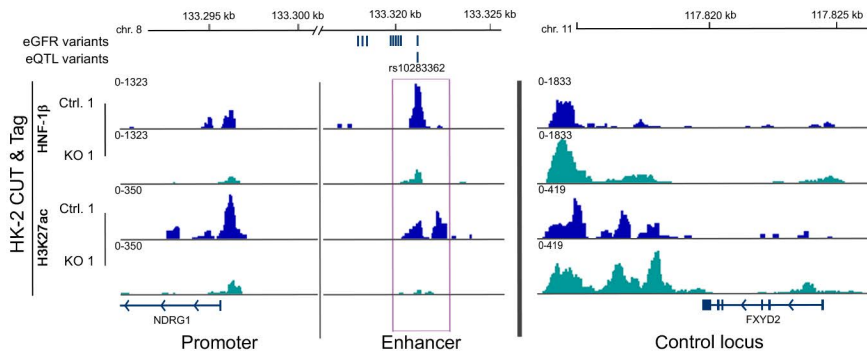

# Supplementary Figure 12

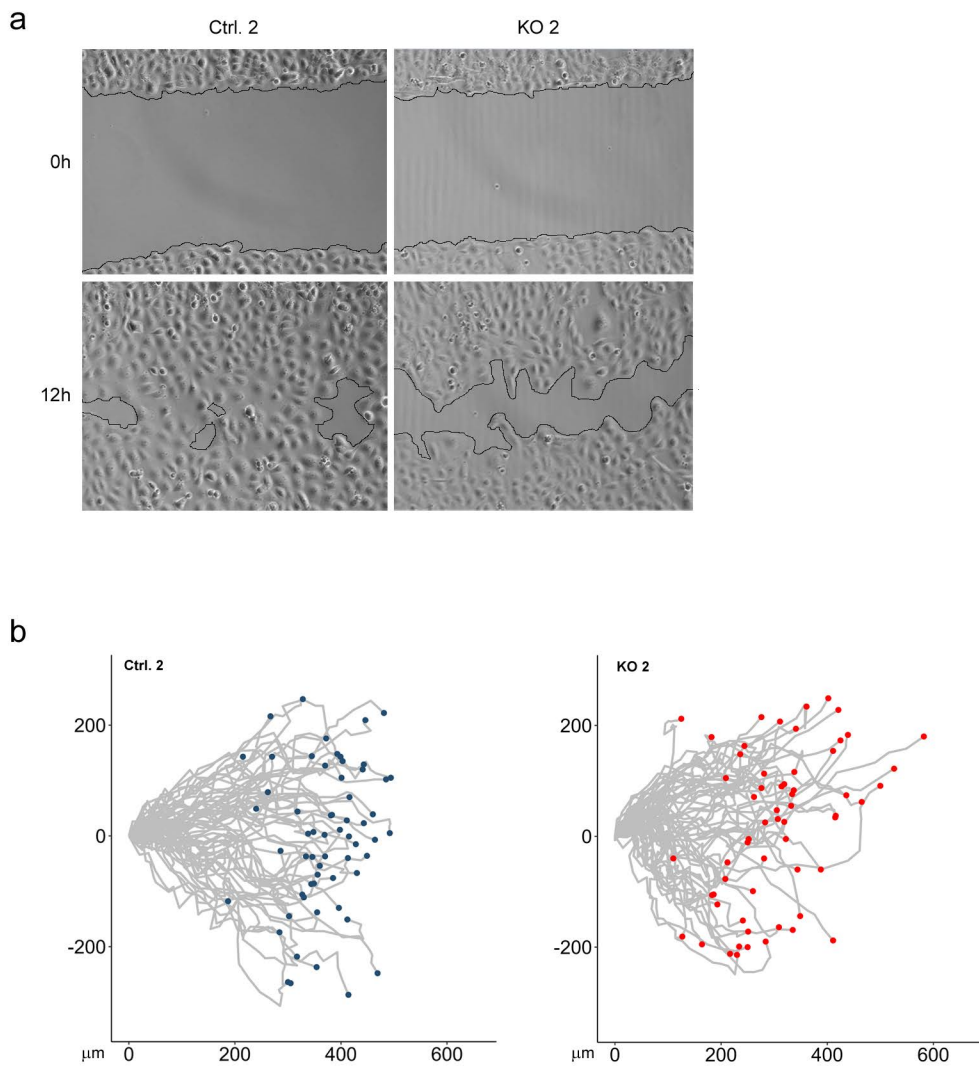

# Supplementary Figure 13

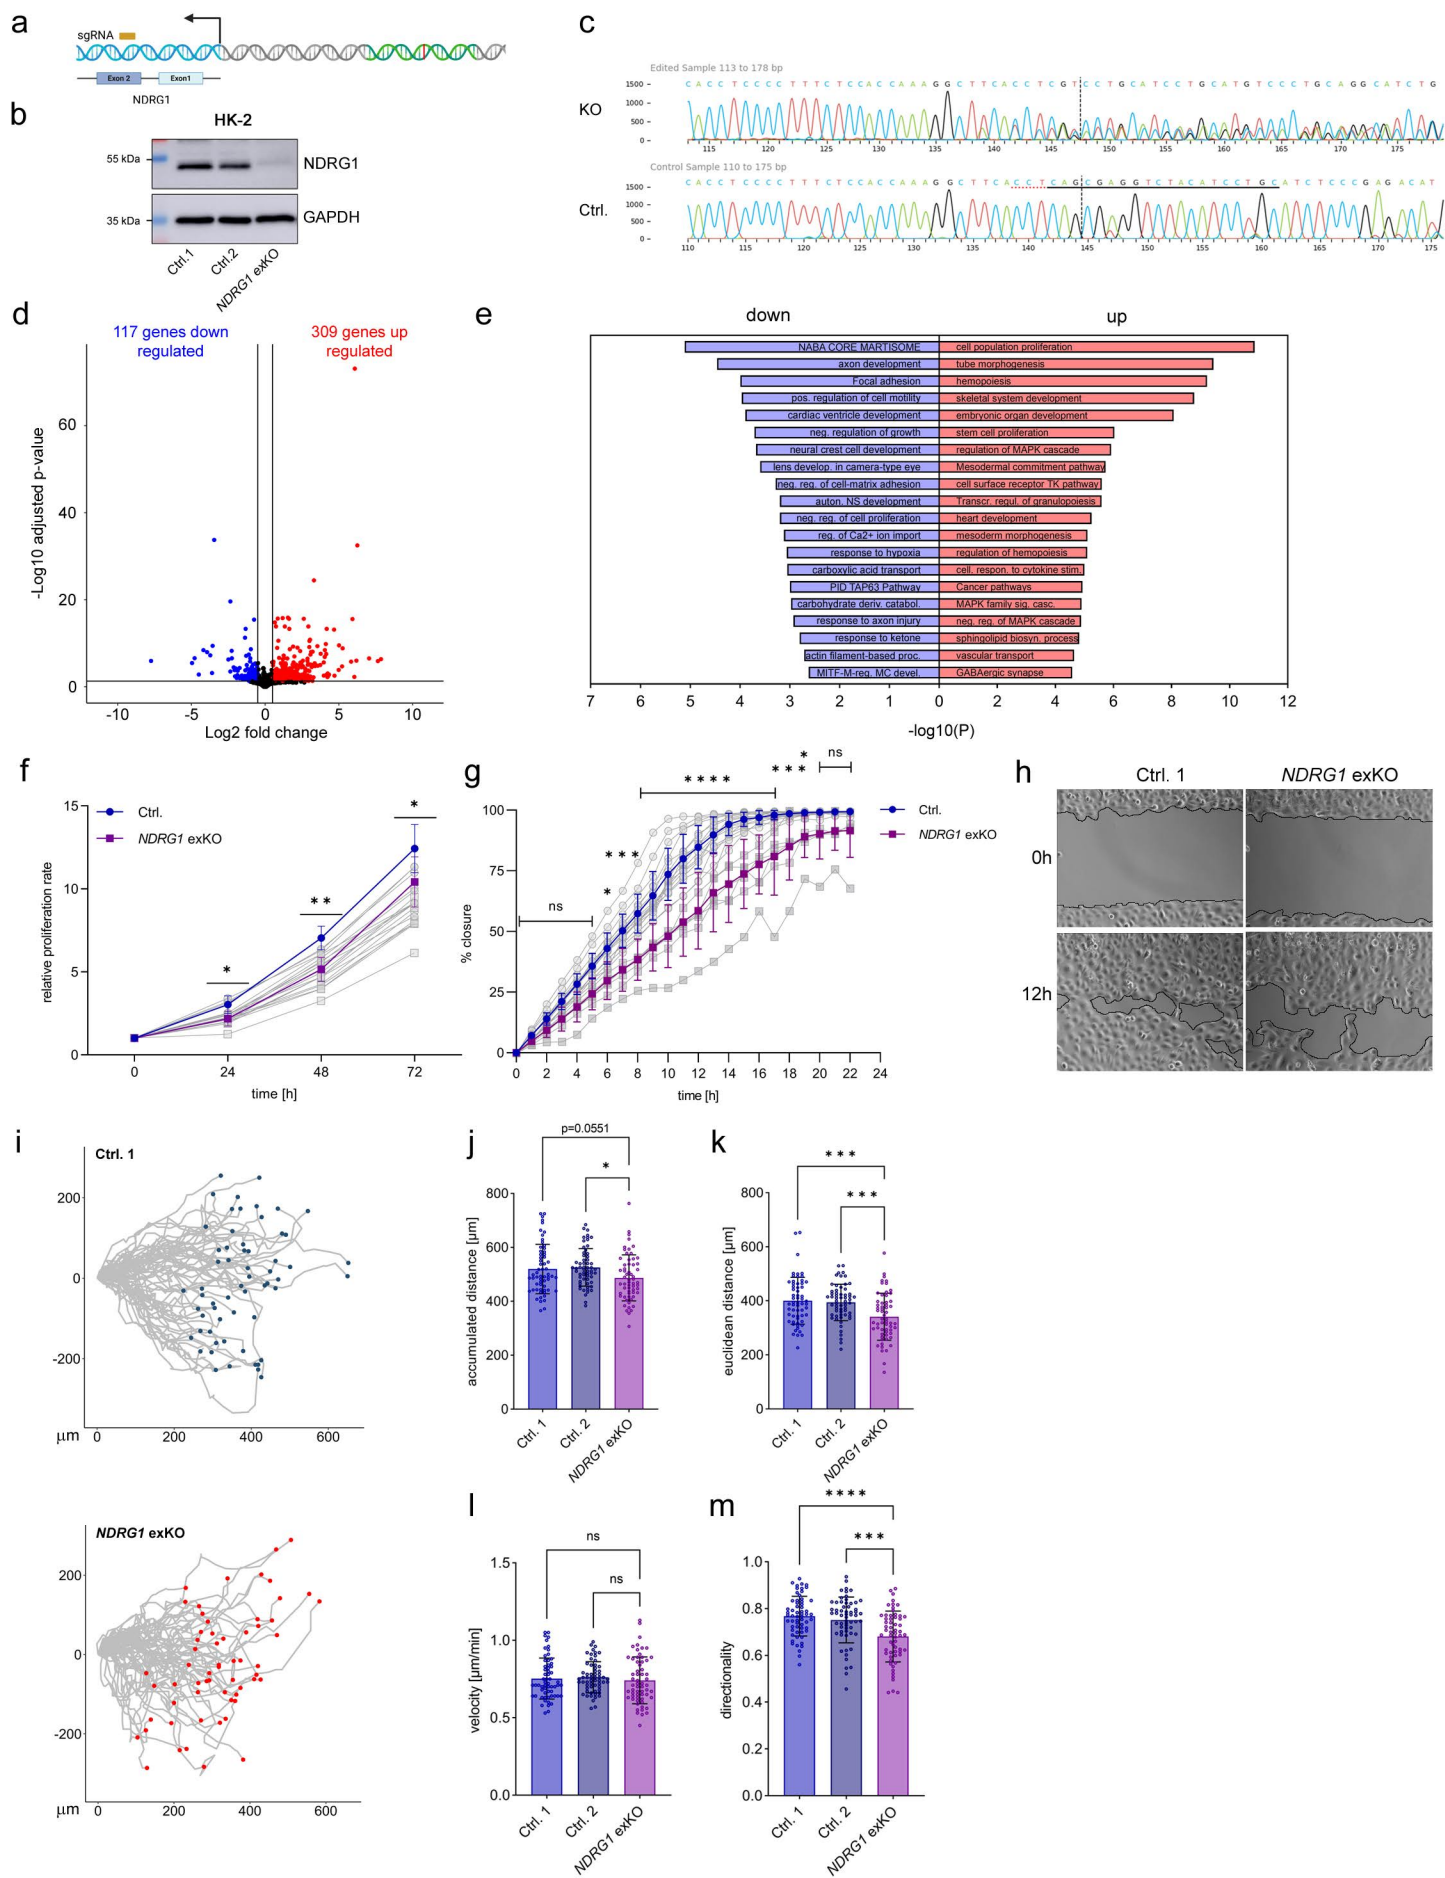

Supplement: Supplementary file 1 [file 9802eb91ad3126879dddf504.pdf]
