# Supplementary material
Source: Research Square preprint supplement (doi:10.21203/rs.3.rs-8000899/v1)
Supplement: Supplementary file 1 [file fca5e496ce9a238f6da3f74d.xlsx]

## Sheet: README
	Supplementary Table 1	Number of RE per landscape and percent of overlap with cCRE
	Supplementary Table 2	Number of variants in open chromatin in different tissues
	Supplementary Table 3	Variants in open chromatin in different tissues
	Supplementary Table 4	ATAC-seq sites in PTC
	Supplementary Table 5	Matrix of variants overlapping open chromatin (spm3.5) in kidney and PTC
	Supplementary Table 6	CADD variants
	Supplementary Table 7	ABC positive eGFR variants
	Supplementary Table 8	Genes of eGFR variant positive ABC interactions
	Supplementary Table 9	Number of eQTL overlapping open chromatin in different tissues
	Supplementary Table 10	Kidney eQTL variants in open chromatin from kidney or PTC
	Supplementary Table 11	Motif enrichment in eGFR variant positive REs of kidney and PTC
	Supplementary Table 12	Motif enrichment in eGFR variant positive snATAC sites
	Supplementary Table 13	Consensus HNF-1β binding sites
	Supplementary Table 14	HNF-1β binding sites in PTC harbouring eGFR variants
	Supplementary Table 15	Differentially expressed genes in HK-2 Ctrl. vs. NDRG1 enhancer KO cells
	Supplementary Table 16	Expression of genes within +/- 500 kb from NDRG1 in HK-2 Ctrl. vs. NDRG1 enhancer KO cells
	Supplementary Table 17	Metascape enrichment analysis of differentially expressed genes in HK-2 Ctrl. vs. NDRG1 enhancer KO cells
	Supplementary Table 18	Oligonucleotides

## Sheet: Supplementary Table_1
Supplementary Table 1: Number of RE per landscape and percent of overlap with cCRE
Definition of accessible chromatin in 29 human tissues using publicly avaialble ATAC-seq data resulting in >95% overlap with ENCODE defined cCRE
Label		Total_number_of_RE_in_landscape	regions_overlap_with_cCRE	overlap
Adrenal gland		57712	57163	0.990487
Body of pancreas		37302	37027	0.992628
Breast epithelium tissue		41473	41150	0.992212
Coronary artery		33470	32998	0.985898
Gastrocnemius medialis		52461	51842	0.988201
Gastroesophageal sphincter		38786	38530	0.9934
Heart left ventricle		47672	47294	0.992071
Heart right ventricle		55226	54841	0.993029
Left cardiac atrium		44521	44217	0.993172
Lower lobe of left lung		56911	56478	0.992392
Mesenteric fat pad		49191	48428	0.984489
Mucosa of descending colon		54158	53502	0.987887
Ovary		47776	47385	0.991816
Pancreas		43486	43088	0.990848
Posterior vena cava		47936	47542	0.991781
Prostate gland		40694	38977	0.957807
Psoas muscle		47380	46536	0.982187
Right cardiac atrium		44668	44353	0.992948
Right lobe of liver		61840	61143	0.988729
Sigmoid colon		36040	35791	0.993091
Spleen		28779	27841	0.967407
Stomach		38980	38686	0.992458
Subcutaneous adipose tissue		42157	41812	0.991816
Thyroid gland		59441	59092	0.994129
Tibial artery		43245	42918	0.992438
Tibial nerve		34089	33437	0.980874
Transverse colon		42378	42080	0.992968
Upper lobe of right lung		45711	45352	0.992146
Kidney		59485	58969	0.991326

## Sheet: Supplementary Table_2
Supplementary Table 2: Number of variants in open chromatin in different tissues
Label	Total_number_of_variants	Total_number_of_positive_RE
Adrenal gland	731	562
Body of pancreas	546	405
Breast epithelium tissue	559	426
Coronary artery	459	352
Gastrocnemius medialis	747	581
Gastroesophageal sphincter	533	413
Heart left ventricle	648	513
Heart right ventricle	735	569
Left cardiac atrium	578	459
Lower lobe of left lung	683	525
Mesenteric fat pad	586	452
Mucosa of descending colon	708	537
Ovary	646	498
Pancreas	597	454
Posterior vena cava	603	465
Prostate gland	529	408
Psoas muscle	724	560
Right cardiac atrium	593	470
Right lobe of liver	877	664
Sigmoid colon	475	366
Spleen	334	253
Stomach	534	407
Subcutaneous adipose tissue	532	409
Thyroid gland	750	582
Tibial artery	561	433
Tibial nerve	455	351
Transverse colon	535	415
Upper lobe of right lung	611	461
Kidney	753	566

## Sheet: Supplementary Table_3
Supplementary Table 3: Variants in open chromatin in different tissues
Reference SNP ID (RSID); numbering reveals presence (1) or absence (0) of the respective variant in open chromatin from each tissue
RSID	Adrenal gland	Body of pancreas	Breast epithelium tissue	Coronary artery	Gastrocnemius medialis	Gastroesophageal sphincter	Heart left ventricle	Heart right ventricle	Left cardiac atrium	Lower lobe of left lung	Mesenteric fat pad	Mucosa of descending colon	Ovary	Pancreas	Posterior vena cava	Prostate gland	Psoas muscle	Right cardiac atrium	Right lobe of liver	Sigmoid colon	Spleen	Stomach	Subcutaneous adipose tissue	Thyroid gland	Tibial artery	Tibial nerve	Transverse colon	Upper lobe of right lung	Kidney	sum
9:140071411_A_G	0	0	0	0	0	0	0	0	0	0	0	1	0	0	0	0	0	0	0	0	0	0	0	0	0	0	0	0	0	1
9:140072573_T_C	1	0	0	0	0	0	0	0	0	0	0	0	0	0	0	0	0	0	0	0	0	0	0	0	0	0	0	0	0	1
9:140084485_G_A	0	1	0	0	0	0	0	0	0	0	0	0	0	0	0	0	0	0	0	0	0	0	0	0	0	0	0	0	0	1
rs1000423	0	0	0	0	0	0	0	0	0	0	0	0	0	0	0	0	0	0	0	0	0	0	0	0	1	0	0	0	0	1
rs1003385	0	0	0	0	0	0	0	0	0	0	0	0	0	0	0	0	0	0	0	0	0	0	0	0	0	0	0	0	1	1
rs10035600	0	0	0	0	0	0	0	1	1	0	0	0	0	0	1	0	0	1	0	0	0	0	0	0	0	0	0	0	0	4
rs10044814	0	0	1	0	0	0	0	0	0	0	0	0	0	0	0	0	0	0	1	0	0	0	0	0	0	0	0	0	0	2
rs10060641	0	0	0	0	0	0	0	0	0	0	0	0	0	0	0	0	0	0	1	0	0	0	0	1	0	0	0	0	0	2
rs10078496	0	0	0	0	0	0	0	0	0	0	0	0	0	0	0	0	0	0	1	0	0	0	0	0	0	0	0	0	0	1
rs10093614	0	0	0	0	0	0	0	0	0	0	0	0	0	0	0	0	0	0	0	0	0	0	0	0	0	0	0	1	0	1
rs1012793	0	0	1	0	0	0	0	0	0	0	0	0	0	0	0	0	0	0	0	0	0	0	0	0	0	0	0	0	0	1
rs10227172	0	0	0	0	0	0	0	0	0	0	1	0	0	0	0	0	0	0	0	0	0	0	1	0	0	0	0	0	0	2
rs10254963	0	1	0	0	0	0	0	0	0	0	0	1	0	1	0	0	0	0	1	0	0	0	0	1	0	0	0	0	1	6
rs10258675	0	0	0	0	1	0	0	0	0	0	0	0	0	0	0	0	1	0	0	0	0	0	0	0	0	0	0	0	0	2
rs10283362	0	0	0	0	1	0	0	0	0	0	0	0	0	0	0	0	1	0	1	0	0	1	0	0	0	0	0	0	1	5
rs10414263	0	0	0	0	0	0	0	0	0	0	1	0	0	0	0	0	0	0	0	0	0	0	0	0	0	0	0	0	0	1
rs10416600	1	1	1	1	1	1	1	1	1	1	1	1	1	1	1	1	1	1	1	1	0	1	1	1	1	0	1	1	1	27
rs1042752	0	0	0	0	0	0	0	0	0	0	0	0	0	0	0	0	0	0	0	0	0	1	0	0	0	0	0	0	0	1
rs10474336	0	0	0	0	0	0	0	0	0	0	0	0	0	0	0	0	0	0	0	0	0	0	0	1	0	0	0	0	0	1
rs10511909	0	0	0	0	0	0	1	0	1	0	0	0	0	0	1	0	0	1	0	0	0	0	0	0	0	0	0	0	0	4
rs1056583	0	0	0	1	0	0	1	0	1	0	0	0	0	0	1	0	1	1	0	0	0	0	0	0	0	1	0	0	0	7
rs1056819	0	0	0	0	0	0	0	0	0	0	0	0	0	0	1	0	0	0	0	0	0	0	0	0	0	0	1	0	0	2
rs1057868	1	0	0	0	0	0	1	1	1	0	0	1	1	0	1	0	1	1	1	0	0	0	0	1	0	0	0	0	0	11
rs1058004	0	0	0	0	0	0	0	0	0	0	0	0	0	0	0	0	0	0	0	0	0	0	0	1	0	0	0	0	0	1
rs1059263	0	0	1	0	0	0	0	0	0	0	0	0	0	0	0	1	0	0	0	0	0	0	0	0	0	0	0	0	0	2
rs10740418	0	0	0	0	0	0	0	0	0	1	0	0	0	0	0	0	0	0	0	0	0	0	0	0	0	0	0	1	1	3
rs10747655	0	0	1	0	0	0	0	0	0	0	0	1	0	0	0	0	0	0	0	0	0	0	0	0	0	0	0	0	0	2
rs1075403	0	0	0	0	0	1	0	0	0	0	1	0	0	0	0	0	0	0	0	0	0	0	0	0	0	0	0	0	0	2
rs10769263	0	0	0	0	0	0	0	0	0	0	0	0	0	0	0	1	0	0	0	0	0	0	0	0	0	0	0	0	0	1
rs1077481	0	1	0	0	0	0	0	0	0	0	0	1	0	1	0	0	0	0	1	0	0	0	0	1	0	0	0	0	1	6
rs10777530	0	0	0	0	0	0	0	0	0	0	0	0	0	0	0	0	0	0	0	0	0	0	0	1	0	0	0	0	0	1
rs10783193	0	0	0	0	0	0	1	0	0	0	0	0	0	0	0	0	0	0	1	0	0	0	0	0	0	0	0	0	1	3
rs10816810	0	1	0	0	1	0	0	0	0	1	1	1	0	0	1	0	1	1	1	0	0	0	0	1	0	0	0	1	1	12
rs10838702	0	0	0	0	0	0	0	0	0	0	0	0	0	0	0	0	0	0	0	0	1	0	0	0	0	0	0	0	0	1
rs10851885	0	1	0	0	1	0	0	0	0	0	0	0	0	1	0	0	1	0	0	0	0	0	0	0	0	0	0	0	0	4
rs10859532	0	0	0	0	0	0	0	0	0	0	0	0	0	0	0	0	0	0	0	0	0	0	0	1	0	0	0	0	0	1
rs10876477	0	1	0	0	1	0	1	0	1	0	0	0	1	1	1	0	1	1	0	0	0	0	1	0	0	0	0	0	1	11
rs10979871	0	0	1	0	1	0	0	0	0	0	0	0	0	0	0	0	1	0	0	0	0	0	0	0	0	0	0	0	0	3
rs10979872	0	0	1	0	1	0	0	0	0	0	0	0	0	0	0	0	1	0	0	0	0	0	0	0	0	0	0	0	0	3
rs10993905	0	0	0	0	1	0	0	0	0	0	0	0	0	0	0	0	1	0	0	0	0	0	0	0	0	0	0	0	0	2
rs10993906	0	0	0	0	1	0	0	0	0	0	0	0	0	0	0	0	1	0	0	0	0	0	0	0	0	0	0	0	0	2
rs10994856	0	0	0	0	0	0	0	0	0	0	0	1	0	1	0	0	0	0	1	0	0	0	0	0	0	0	0	0	0	3
rs10994860	0	0	0	0	0	0	0	0	0	0	0	1	0	0	0	0	0	0	1	0	0	0	0	0	0	0	0	0	0	2
rs10997975	0	0	0	0	0	0	0	0	0	0	0	1	0	0	0	0	0	0	0	0	0	0	0	0	0	0	0	0	0	1
rs10998009	0	0	0	0	1	0	0	0	0	0	0	0	0	0	0	0	1	0	0	0	0	0	0	0	0	0	0	0	0	2
rs11039225	1	0	1	1	1	0	1	1	1	1	1	0	1	1	1	0	1	1	0	0	0	0	0	0	0	0	1	0	1	16
rs11041713	0	0	0	0	0	0	0	0	0	0	0	0	0	0	0	0	0	0	0	0	0	0	0	1	0	0	0	0	1	2
rs1105270	0	0	1	0	0	0	0	0	0	0	0	0	0	0	0	0	0	0	0	0	0	0	0	0	0	0	0	0	0	1
rs11063202	0	0	0	0	1	0	0	0	0	0	0	0	0	0	0	0	1	0	0	0	0	0	0	0	0	0	0	0	0	2
rs1106481	0	0	0	0	1	0	0	0	0	0	0	0	0	0	0	0	0	0	0	0	0	0	0	1	0	0	0	0	1	3
rs1106482	0	0	0	0	1	0	0	0	0	0	0	0	0	0	0	0	0	0	0	0	0	0	0	1	0	0	0	0	1	3
rs11070167	0	0	0	0	0	0	0	0	0	0	0	0	0	0	1	0	0	0	0	0	0	0	0	0	0	0	0	0	0	1
rs11079812	0	1	0	0	0	0	0	0	0	0	0	1	0	1	0	0	0	0	1	0	0	0	0	0	0	0	0	0	1	5
rs11086103	0	0	0	0	0	0	0	0	0	0	0	0	0	0	0	0	0	0	0	0	0	0	0	0	0	1	0	0	0	1
rs11102972	0	0	0	0	1	0	0	0	0	0	0	0	0	0	0	0	1	0	0	0	0	0	0	0	0	0	0	0	0	2
rs11121627	1	1	1	1	1	1	1	1	1	1	1	1	1	1	1	0	1	1	1	1	0	1	1	1	1	0	1	1	1	26
rs11123169	0	0	0	0	0	0	0	0	0	0	0	0	0	0	0	0	0	0	0	0	0	0	0	1	0	0	0	0	0	1
rs11154336	0	0	0	0	0	0	0	0	0	0	0	0	0	0	0	0	0	0	1	0	0	0	0	0	0	0	0	0	1	2
rs11188335	0	0	0	0	0	0	0	0	0	0	0	0	0	0	0	0	0	0	1	0	0	0	0	0	0	1	0	0	0	2
rs11209108	0	1	0	0	0	0	0	0	0	0	0	0	0	0	0	0	0	0	1	0	0	0	0	0	0	0	0	0	1	3
rs112119822	1	0	1	1	0	1	0	1	0	1	0	0	1	0	0	1	0	0	1	1	0	0	1	0	1	1	1	1	1	16
rs11217089	0	0	0	0	0	0	0	0	0	0	0	0	0	0	0	0	0	0	0	0	0	0	0	0	1	0	0	0	0	1
rs11217090	0	0	0	0	0	0	0	0	0	0	0	0	0	0	0	0	0	0	0	0	0	0	0	0	1	0	0	0	0	1
rs11217091	0	0	0	0	0	0	0	0	0	0	0	0	0	0	0	1	0	0	0	0	0	0	0	0	0	0	0	0	0	1
rs112402118	0	0	0	0	0	0	0	1	0	0	0	0	0	0	0	0	0	0	0	0	0	0	0	0	0	0	0	0	0	1
rs11261022	0	0	0	0	0	0	0	0	0	0	0	0	0	0	0	0	0	0	0	0	0	0	0	0	0	0	0	0	1	1
rs112638966	1	0	1	0	0	0	1	1	1	1	1	1	1	1	0	0	1	1	1	0	1	1	1	1	1	0	0	1	0	19
rs112694524	1	1	1	1	1	1	0	1	0	1	0	1	1	1	1	1	0	0	1	1	1	1	1	0	1	1	1	1	1	23
rs1127851	0	0	0	1	0	0	0	0	0	0	0	0	0	0	0	0	0	0	0	0	0	0	0	0	0	0	0	0	0	1
rs113437942	0	0	0	0	0	0	0	1	1	0	0	1	0	0	0	0	0	0	0	0	1	0	0	0	0	0	1	0	0	5
rs1134734	0	1	1	0	0	0	0	0	0	0	0	0	0	1	0	1	0	0	0	0	0	1	1	0	0	1	0	0	0	7
rs113762960	0	0	0	0	0	0	0	0	0	0	0	0	0	0	0	0	0	0	1	0	0	0	0	0	0	0	0	0	0	1
rs113867519	0	0	0	0	0	0	0	1	0	0	0	0	0	0	0	0	0	0	0	0	0	0	0	0	0	0	0	0	1	2
rs113956264	0	0	0	0	0	0	0	1	0	0	0	0	0	0	0	0	1	0	0	0	0	0	0	0	0	0	0	0	0	2
rs114165349	0	1	0	1	0	0	0	1	0	0	0	0	1	0	1	0	1	1	1	0	1	0	0	0	0	0	0	0	1	10
rs1144595	0	0	0	0	1	0	0	0	0	0	0	0	0	0	0	0	1	0	0	0	0	0	0	0	0	0	0	0	0	2
rs1145093	0	0	0	0	0	0	0	0	0	0	0	0	0	1	0	0	0	0	0	0	0	0	0	0	0	0	0	0	0	1
rs1151625	0	0	0	0	0	0	1	0	0	0	0	1	0	0	0	0	0	0	1	0	0	0	0	1	1	0	1	0	0	6
rs1153860	0	0	0	0	0	0	0	0	0	0	0	0	0	0	0	0	0	0	1	0	0	0	0	0	0	0	0	0	0	1
rs11564722	0	0	0	0	0	0	0	0	0	0	0	0	0	0	0	0	0	0	1	0	0	0	0	0	0	0	0	0	0	1
rs11578280	1	1	0	0	0	0	1	1	1	1	0	1	1	1	0	0	0	1	1	0	0	1	0	0	0	0	0	1	1	14
rs11611695	0	0	0	0	0	0	1	1	0	0	0	0	1	0	0	0	0	0	0	0	0	0	1	0	0	0	0	0	0	4
rs11613538	0	0	0	0	0	0	0	0	0	0	1	0	0	0	0	0	0	0	0	0	0	0	0	0	0	0	0	0	0	1
rs11624512	1	0	0	0	0	0	0	0	0	0	0	0	0	0	0	0	0	0	0	0	0	0	0	0	0	0	0	0	0	1
rs11625405	0	0	0	0	0	0	0	0	0	1	0	0	0	0	0	0	0	0	0	0	0	0	0	1	0	0	0	1	0	3
rs11633717	0	0	0	0	0	0	1	1	0	0	0	0	0	0	0	0	0	0	0	0	0	0	0	0	0	0	0	0	0	2
rs11645288	0	0	0	0	0	0	0	0	0	0	0	0	0	0	0	0	0	0	1	0	0	0	0	0	0	0	0	0	0	1
rs11656414	0	0	0	0	1	0	1	1	0	0	1	0	0	0	0	0	1	0	0	0	0	0	0	0	0	0	0	0	0	5
rs116646608	0	0	0	0	0	0	0	1	0	0	0	0	0	0	0	0	0	0	0	0	0	0	0	0	0	0	0	0	1	2
rs11670056	1	0	0	0	1	1	1	1	1	1	1	0	1	1	1	1	1	1	1	1	0	1	1	1	0	0	1	1	0	21
rs11677172	0	0	0	0	0	0	0	0	0	0	0	0	0	0	0	1	0	0	0	0	0	0	0	0	0	0	0	0	0	1
rs11689011	0	0	0	0	0	0	0	0	0	0	0	0	0	0	0	0	0	0	1	0	0	0	0	0	0	0	0	0	0	1
rs11694902	0	0	0	0	0	0	0	0	0	0	0	0	0	0	0	0	0	0	0	0	1	0	0	0	0	0	0	0	0	1
rs11697103	0	0	0	0	0	0	0	0	0	0	0	1	0	0	0	0	0	0	0	0	0	0	0	0	0	0	0	0	0	1
rs11698977	0	0	0	0	1	0	0	0	0	0	0	0	0	0	0	0	1	0	0	0	0	0	0	0	0	0	0	0	1	3
rs11723654	0	0	0	0	0	0	0	0	0	0	0	1	0	0	0	0	0	0	0	0	0	0	0	0	0	0	0	0	0	1
rs1173642	1	0	0	0	0	0	0	0	0	0	0	0	0	0	0	0	0	0	0	0	0	0	0	0	0	0	0	0	0	1
rs1173643	1	0	0	0	0	0	0	0	0	0	0	0	0	0	0	0	0	0	0	0	0	0	0	0	0	0	0	0	0	1
rs117451470	0	0	0	0	0	0	1	0	0	0	0	0	0	0	0	0	0	1	0	0	0	0	0	0	0	0	0	0	0	2
rs11745300	0	0	0	1	0	0	0	0	0	0	0	0	0	0	0	0	0	0	0	0	0	0	0	0	0	0	0	0	0	1
rs11750211	0	1	0	0	0	0	0	0	0	0	0	0	0	0	0	0	0	0	0	0	0	0	0	0	0	0	0	0	0	1
rs11759908	0	0	1	0	0	0	0	0	0	0	0	0	0	0	0	0	0	0	0	0	0	1	0	1	0	0	0	0	0	3
rs11760914	0	0	0	0	0	0	0	1	0	0	0	0	0	0	0	0	0	0	0	0	0	0	0	0	0	0	0	0	0	1
rs11786896	1	0	0	1	0	1	1	1	0	0	0	0	1	0	1	1	0	0	1	1	0	1	1	0	1	1	1	0	0	15
rs11791149	0	0	0	0	0	0	1	0	0	0	0	0	0	0	0	0	0	0	0	0	0	0	0	0	0	0	0	0	0	1
rs11791887	0	0	0	0	0	0	0	0	0	0	0	0	0	0	0	0	0	0	1	0	0	0	0	0	0	0	0	0	0	1
rs11879706	0	0	0	0	0	0	0	0	0	0	0	0	0	0	0	0	1	0	0	0	0	0	0	0	0	0	0	0	0	1
rs11883967	0	1	0	0	0	1	0	0	1	0	1	0	0	0	0	0	0	0	0	1	0	0	1	1	1	0	0	0	0	8
rs11884158	0	0	0	0	0	0	0	0	0	0	0	0	0	0	0	0	0	0	1	0	0	0	0	0	0	0	0	0	0	1
rs11908097	0	0	0	0	0	0	0	0	0	0	0	1	0	0	0	0	0	0	0	0	0	0	0	0	0	0	0	0	0	1
rs1198975	0	0	0	0	0	0	0	1	0	0	0	0	0	0	0	0	0	0	0	0	0	0	0	1	0	0	0	0	0	2
rs1198978	0	0	0	0	0	0	0	0	0	0	0	0	0	1	0	0	0	0	1	0	0	0	0	1	0	0	0	0	1	4
rs12024377	0	0	0	0	0	0	0	0	0	0	0	0	0	0	0	0	0	0	0	0	0	1	0	0	0	0	0	0	0	1
rs12032788	0	0	0	0	0	0	0	0	0	0	0	1	0	0	0	0	0	0	0	0	0	0	0	0	0	0	0	0	0	1
rs12066343	0	0	0	0	0	0	0	1	0	0	1	0	0	0	0	0	0	0	0	0	0	0	0	0	1	0	0	0	0	3
rs12078697	0	0	0	0	0	0	0	0	0	0	0	1	0	0	0	0	0	0	0	0	0	0	0	0	0	0	0	0	0	1
rs12085912	0	0	0	0	1	0	0	0	0	0	0	0	0	0	0	0	0	0	0	0	0	0	0	0	0	0	0	0	0	1
rs12087024	0	1	0	0	0	0	0	0	0	0	0	1	0	1	0	0	0	0	1	0	0	1	1	0	0	0	1	0	1	8
rs12090008	0	1	0	0	0	0	0	0	0	0	0	1	1	1	0	0	0	0	0	0	0	0	0	0	0	0	0	0	0	4
rs12118279	1	0	1	0	0	1	1	1	0	0	0	0	1	0	0	0	0	0	0	1	0	1	0	0	0	1	0	1	0	10
rs12149780	0	0	0	0	0	0	0	0	0	0	0	0	0	0	0	0	0	0	1	1	0	0	0	0	0	0	0	0	0	2
rs12256103	1	1	1	1	1	1	1	1	1	1	1	1	1	1	1	1	1	1	1	1	1	1	1	1	1	1	1	1	1	29
rs1226590	0	0	0	0	1	0	1	1	0	0	0	0	0	0	0	0	1	0	0	0	0	0	0	0	0	0	0	0	0	4
rs1226591	0	0	0	0	1	0	1	1	0	0	0	0	0	0	0	0	1	0	0	0	0	0	0	0	0	0	0	0	0	4
rs12280501	0	0	0	0	0	0	0	0	0	0	0	0	0	0	0	1	0	0	0	0	0	0	0	0	0	0	0	0	0	1
rs12348775	0	0	0	0	1	0	0	0	0	0	0	0	0	0	0	0	0	0	0	0	0	0	0	0	0	0	0	0	0	1
rs12413668	0	1	1	1	1	1	1	0	0	0	0	0	0	0	0	0	0	0	0	1	0	0	1	1	1	0	1	0	0	11
rs12417556	0	0	0	0	0	0	0	0	0	0	0	0	0	0	0	0	0	0	0	0	0	1	0	0	0	0	0	0	0	1
rs1242485	0	1	1	0	0	0	0	0	0	1	0	0	0	1	0	0	0	0	1	0	1	1	1	0	0	1	0	0	1	10
rs12425869	0	0	0	0	0	0	0	0	0	0	0	0	0	0	0	0	0	0	0	0	0	0	0	1	0	0	0	0	0	1
rs12432201	1	1	1	0	0	1	1	1	0	0	0	1	1	1	0	0	0	0	1	1	0	1	1	1	0	1	1	1	0	17
rs12453443	0	0	0	0	0	0	0	0	0	0	0	0	0	0	0	0	0	0	0	0	0	0	0	0	0	0	0	1	0	1
rs12464085	0	0	0	0	0	0	0	0	0	0	0	0	0	0	0	0	1	0	0	0	0	0	0	0	0	0	0	0	0	1
rs12486405	0	0	1	0	0	0	0	0	0	0	0	0	0	0	0	0	0	0	0	0	0	0	0	0	0	0	0	0	0	1
rs12518560	0	0	1	0	1	0	0	0	0	0	0	0	0	0	1	0	1	0	0	0	0	0	0	0	0	0	0	0	0	4
rs12520377	0	0	1	0	1	0	0	0	0	0	0	0	0	0	1	0	1	0	0	0	0	0	0	0	0	0	0	0	0	4
rs1258178	0	0	0	0	0	0	0	0	0	0	0	0	0	0	0	0	0	0	0	0	0	0	0	0	0	0	0	0	1	1
rs1258179	0	0	0	0	0	0	0	0	0	0	0	0	0	0	0	0	0	0	0	0	0	0	0	0	0	0	0	0	1	1
rs12602010	0	0	0	1	0	0	0	1	0	0	0	0	0	0	0	1	0	0	0	0	0	0	0	0	0	0	0	0	0	3
rs12614953	0	1	0	0	0	0	0	0	0	1	0	1	0	1	0	0	0	0	1	0	0	1	1	0	0	0	1	1	1	10
rs12617964	0	1	0	0	0	0	0	0	0	1	0	0	0	0	0	0	0	0	1	0	0	1	1	0	0	0	1	1	1	8
rs12670408	0	0	1	1	0	1	0	1	1	1	0	1	1	0	0	1	0	0	1	1	0	0	0	1	0	1	1	1	0	15
rs12709112	0	0	0	0	0	0	0	0	0	0	0	0	0	0	0	0	0	0	0	0	0	0	0	0	0	0	0	0	1	1
rs12722725	0	1	0	0	1	0	1	1	1	0	1	0	0	0	1	0	1	1	0	0	0	0	0	0	0	0	0	0	0	9
rs12724682	0	1	0	0	0	0	0	1	0	0	0	0	0	0	0	0	1	0	1	0	0	1	0	0	0	0	0	0	0	5
rs12736457	1	1	1	0	1	1	1	1	1	1	1	1	1	1	1	0	1	1	1	1	1	1	1	1	0	1	1	1	0	25
rs12740374	0	1	1	0	1	1	0	0	0	1	0	0	1	1	0	0	1	0	1	1	0	1	0	1	0	0	0	1	1	14
rs12741552	1	1	1	1	1	1	1	1	1	1	1	1	1	1	1	1	1	1	1	1	1	1	1	1	1	1	1	1	1	29
rs1274964	0	0	0	0	0	0	0	0	1	0	0	0	0	0	0	0	0	0	0	0	0	0	0	0	0	0	0	0	0	1
rs1278664	0	0	0	0	0	0	0	0	0	1	0	0	0	0	0	0	0	0	0	0	0	0	0	0	0	0	0	1	0	2
rs12858132	1	0	0	0	1	0	0	1	0	1	0	1	0	1	0	1	0	0	1	1	1	0	0	1	1	1	0	1	1	15
rs12922822	0	0	0	0	0	0	0	0	0	0	0	0	0	0	0	0	0	0	0	0	0	0	0	0	0	0	0	0	1	1
rs12928187	0	0	0	0	0	0	0	0	0	0	0	1	0	0	0	0	0	0	0	0	0	0	0	0	0	0	0	0	0	1
rs12937411	0	0	0	0	0	0	0	0	0	0	1	0	0	0	0	0	0	0	0	0	0	0	0	0	0	0	0	0	0	1
rs12938840	0	0	1	0	0	0	0	0	0	0	0	1	1	1	0	1	0	0	0	1	0	1	1	0	0	1	1	0	1	11
rs12938914	0	0	0	0	0	0	0	0	0	0	0	1	0	1	0	0	0	0	0	0	0	0	0	0	0	0	0	0	0	2
rs12939848	1	0	0	0	0	1	1	1	1	1	1	1	1	1	1	1	0	1	1	0	1	0	0	0	0	0	0	1	0	16
rs12977299	0	1	0	0	0	0	0	0	0	0	0	0	0	0	0	0	0	1	0	1	0	1	1	1	1	0	0	0	0	7
rs12983363	0	0	0	0	0	0	1	0	0	0	0	0	1	0	0	0	0	0	0	0	0	0	0	0	0	0	0	1	0	3
rs12983444	0	0	1	0	0	1	0	0	0	0	0	0	1	0	0	0	0	0	0	0	0	0	0	0	0	0	0	0	0	3
rs13059257	1	0	0	0	1	0	1	1	0	1	0	1	0	1	1	1	0	1	1	0	0	0	0	1	1	0	1	1	0	15
rs13157326	0	0	1	1	0	0	0	0	0	0	0	0	0	0	0	1	0	0	0	0	0	0	0	0	0	0	0	0	0	3
rs13200335	0	0	0	0	1	0	0	0	0	0	0	0	0	0	0	0	0	0	0	0	0	0	0	0	0	0	0	0	0	1
rs132648	0	0	0	0	0	0	0	0	0	0	0	0	0	0	0	1	0	0	0	0	0	0	0	0	0	0	0	0	0	1
rs13287061	0	0	1	0	0	0	0	0	0	0	0	0	0	0	0	0	0	0	0	0	0	0	0	0	0	0	0	0	0	1
rs13296902	0	0	0	0	0	0	0	0	0	0	0	0	0	0	0	0	0	0	0	0	0	0	0	0	0	0	0	0	1	1
rs13297861	0	0	0	0	1	0	0	0	1	0	0	1	0	0	0	1	1	0	1	0	0	0	0	0	0	0	0	0	0	6
rs13298273	0	0	0	0	1	0	0	0	1	0	0	1	0	0	0	1	1	0	1	0	0	0	0	0	0	0	0	0	0	6
rs13299659	0	0	0	0	1	0	0	0	1	0	0	1	0	0	0	0	1	0	1	0	0	0	0	0	0	0	0	0	0	5
rs13335818	0	1	0	0	0	0	0	0	0	0	0	0	0	1	0	0	0	0	1	0	1	0	0	0	0	0	0	0	1	5
rs1371044	0	0	0	0	0	0	0	0	0	0	1	0	1	0	1	0	0	1	0	1	0	0	0	0	1	0	0	0	0	6
rs1377162	0	0	0	0	0	0	0	0	0	0	0	0	0	0	0	0	0	0	0	0	0	0	0	1	1	0	0	0	0	2
rs139814298	1	1	0	0	0	0	0	0	0	0	0	0	0	1	0	0	0	0	0	0	0	0	0	0	0	0	0	0	0	3
rs1405833	0	0	0	0	0	0	0	0	0	0	0	0	0	0	0	0	0	0	0	0	0	0	0	0	0	0	0	0	1	1
rs141100072	0	0	0	0	0	0	0	0	0	0	0	0	0	0	0	0	0	0	0	0	0	0	0	0	0	0	0	0	1	1
rs1426383	1	1	0	1	1	1	1	1	1	1	1	0	1	0	1	1	1	1	1	0	0	1	0	1	1	1	0	1	0	21
rs1463908	0	0	0	0	0	0	0	0	0	0	0	0	0	0	0	1	0	0	0	0	0	0	0	0	0	0	0	0	0	1
rs1469024	0	0	0	0	0	0	0	0	1	0	0	0	0	0	0	0	0	0	0	1	0	0	0	0	0	0	0	0	0	2
rs150975224	1	0	0	0	0	0	1	1	1	0	0	0	0	0	0	0	0	1	0	0	0	0	0	0	0	0	0	0	0	5
rs1530695	0	0	0	0	0	0	0	0	0	0	0	0	0	0	0	0	0	0	0	0	0	0	0	0	0	0	0	0	1	1
rs1545837	0	0	0	0	0	0	0	0	0	0	1	0	0	0	0	0	0	0	0	0	0	0	0	0	0	0	0	0	0	1
rs154656	0	0	0	0	0	0	0	0	0	0	0	0	0	0	0	0	0	0	0	0	0	0	0	0	0	0	0	0	1	1
rs1547108	0	1	0	0	1	0	1	1	1	0	0	1	0	1	0	1	1	1	0	0	0	1	0	0	0	0	1	0	0	12
rs1547110	0	1	0	0	1	0	1	1	1	0	0	1	0	1	0	1	1	1	0	0	0	1	0	0	0	0	1	0	0	12
rs1562474	0	0	0	0	0	0	0	0	0	0	0	0	0	0	0	0	0	0	1	0	0	0	0	0	0	0	0	0	0	1
rs1571256	0	0	0	0	0	0	0	0	0	0	0	0	0	0	0	0	0	0	1	0	0	0	0	0	0	0	0	0	1	2
rs163158	1	0	0	0	0	0	0	0	0	0	0	0	0	0	0	0	0	0	0	0	0	0	0	0	0	0	0	0	0	1
rs1635404	0	0	0	0	1	0	0	0	0	0	0	0	0	0	0	1	1	0	0	0	0	0	0	0	0	0	0	0	0	3
rs166775	0	1	0	0	0	0	0	0	0	0	0	0	0	0	0	0	0	0	1	0	0	1	0	1	0	0	0	0	0	4
rs16827879	1	1	0	1	1	1	0	1	0	1	0	1	1	1	1	0	1	0	1	1	1	0	1	1	1	0	0	1	1	20
rs16839527	0	0	0	0	0	0	0	0	0	0	0	0	0	0	0	0	0	0	0	0	0	0	0	0	0	0	1	0	0	1
rs16856847	0	0	0	0	0	0	0	0	0	0	0	0	0	0	0	0	0	0	1	0	0	0	0	1	0	0	0	0	1	3
rs16874072	0	0	0	0	0	0	0	0	0	0	0	1	0	0	0	0	0	0	0	0	0	1	0	0	0	0	1	0	1	4
rs16989695	0	0	0	0	0	0	0	0	0	0	0	0	0	0	0	0	1	0	0	0	0	0	0	0	0	0	0	0	0	1
rs16996148	0	0	0	0	0	0	1	0	0	0	0	0	0	0	0	0	0	0	0	0	0	0	0	0	0	0	0	0	0	1
rs17027341	0	0	0	0	0	0	0	0	0	0	0	0	0	0	0	0	0	0	0	0	1	0	0	0	0	0	0	0	1	2
rs17035776	0	0	0	0	1	0	0	0	0	0	0	0	0	0	0	0	1	0	0	0	0	0	0	0	0	0	0	0	0	2
rs17050272	0	0	0	0	1	0	1	1	0	0	0	0	0	1	0	0	1	0	1	0	0	1	0	0	0	0	0	0	0	7
rs17068778	0	0	0	0	0	0	0	0	0	0	0	1	0	0	0	0	0	0	0	0	0	0	0	0	0	0	0	0	1	2
rs17113979	0	0	0	0	0	1	1	0	0	0	0	0	0	0	0	0	0	0	0	0	0	0	0	0	0	0	0	0	0	2
rs17113995	0	0	0	0	0	0	0	0	0	0	0	0	0	0	0	0	0	0	1	0	0	0	0	0	0	0	0	0	0	1
rs17152552	0	0	0	0	0	0	0	0	0	0	0	0	0	0	0	0	0	0	0	1	0	0	0	0	0	0	0	0	0	1
rs17152558	0	0	0	0	0	0	0	0	0	0	0	0	0	0	0	0	0	0	0	1	0	0	0	0	0	0	0	0	0	1
rs17216707	0	0	0	0	0	0	0	0	0	0	0	1	0	0	0	0	0	0	1	0	0	0	0	0	0	0	1	0	0	3
rs17228313	0	1	0	0	1	1	1	1	1	0	0	0	1	1	1	0	1	0	1	0	0	0	1	0	0	1	0	0	0	13
rs1732754	0	0	0	0	0	0	0	0	0	0	0	0	1	0	0	0	0	0	0	0	0	0	0	0	0	0	0	0	0	1
rs17413465	0	0	0	0	0	0	0	0	0	0	0	0	0	0	0	0	0	0	0	0	0	0	0	0	0	0	0	0	1	1
rs17420882	0	0	0	0	0	0	1	0	0	0	0	0	0	0	0	1	0	0	0	0	0	0	0	0	0	0	0	0	0	2
rs17472350	0	0	0	0	0	0	0	0	0	0	0	0	0	0	0	0	0	0	0	1	0	0	0	0	0	0	0	0	0	1
rs1750274	0	0	0	0	0	0	0	0	0	0	0	0	0	0	0	0	1	0	0	0	0	0	0	0	0	0	0	0	0	1
rs17524059	1	1	0	1	1	0	1	0	1	1	1	1	0	1	1	0	1	1	0	0	1	0	1	1	0	0	0	0	0	16
rs17546879	0	0	0	0	0	0	0	0	0	0	0	0	0	0	0	0	0	0	0	0	0	0	0	0	0	0	0	0	1	1
rs17581525	0	0	0	0	0	0	0	0	0	1	0	0	0	0	0	0	0	0	0	0	0	0	0	0	0	0	0	1	0	2
rs1758199	0	0	0	0	0	0	0	0	0	0	0	0	0	0	0	0	0	0	0	0	0	0	0	0	0	0	0	0	1	1
rs17616603	0	0	0	0	0	0	0	0	0	0	0	1	0	0	0	0	0	0	0	0	0	0	0	0	0	0	1	0	0	2
rs17638807	0	0	0	0	0	0	0	0	0	0	0	0	0	0	0	0	0	0	0	0	0	0	0	1	0	0	0	0	1	2
rs1765756	1	0	0	0	0	0	0	0	0	0	0	0	0	0	0	0	0	0	0	0	0	0	0	0	0	0	0	0	0	1
rs17685	0	0	0	0	0	0	0	0	0	0	0	0	0	0	0	0	0	1	1	0	0	0	0	0	0	0	0	0	0	2
rs17714252	1	0	0	0	0	0	0	0	0	0	0	0	0	0	0	0	0	0	0	0	0	0	0	0	0	0	0	0	0	1
rs17723260	0	1	1	1	0	1	0	0	0	0	0	0	0	0	0	0	0	0	0	0	0	1	0	0	0	1	1	1	0	8
rs1776052	0	0	0	0	0	0	0	0	0	0	0	1	0	0	0	0	0	0	0	0	0	0	0	0	0	0	0	0	0	1
rs17835600	0	0	0	0	1	0	0	1	0	0	0	0	0	0	0	0	1	0	0	0	0	0	0	0	0	0	0	0	1	4
rs1808335	0	0	0	0	0	0	0	0	0	0	0	1	0	0	0	0	0	0	0	0	0	0	0	0	0	0	0	0	0	1
rs1817050	1	1	0	0	1	0	1	1	1	1	1	1	1	1	1	1	1	1	1	1	1	0	1	1	1	1	1	1	0	24
rs184561571	0	0	0	0	0	0	0	0	0	0	0	0	0	0	0	0	0	0	0	0	0	0	1	0	0	0	0	0	0	1
rs1858800	1	1	1	1	0	0	0	1	0	1	0	1	0	0	0	1	0	0	0	1	0	1	1	1	1	1	1	1	1	17
rs1867784	0	1	0	0	0	0	1	1	0	1	0	0	0	1	0	0	0	0	1	0	0	0	0	0	1	0	0	1	0	8
rs1871196	0	0	1	0	1	0	0	1	0	0	0	0	0	0	0	1	0	0	0	0	0	0	0	0	0	0	0	0	0	4
rs1871388	0	1	0	0	0	0	0	0	0	0	0	0	0	1	0	1	0	0	0	0	0	0	0	0	0	0	0	0	0	3
rs187355703	0	0	0	0	0	0	0	0	0	0	0	0	1	0	0	0	0	0	0	0	0	0	0	0	0	0	0	0	0	1
rs1885042	0	0	0	0	1	0	0	0	0	0	0	0	0	0	0	0	0	0	0	0	0	0	0	0	0	0	0	0	0	1
rs1887251	0	0	0	0	0	0	0	0	0	0	1	0	0	0	0	0	0	0	0	0	0	0	0	0	0	0	0	0	0	1
rs1887252	0	0	0	0	0	0	0	0	0	0	1	0	0	0	0	0	0	0	0	0	0	0	0	0	0	0	0	0	0	1
rs1895062	1	0	0	0	0	0	0	0	0	0	0	0	0	0	0	0	0	0	0	0	0	0	0	0	0	0	0	0	0	1
rs189589409	0	0	0	0	0	0	0	0	0	0	0	0	0	0	0	1	0	0	0	0	0	0	0	0	0	0	1	0	0	2
rs1966961	1	0	1	1	1	1	1	1	0	1	1	0	1	1	0	0	1	1	1	1	1	1	1	1	1	1	1	1	1	24
rs1992909	1	0	0	0	0	0	0	0	0	0	1	0	0	0	1	0	0	0	0	1	0	0	0	0	1	0	0	0	0	5
rs2039424	0	0	0	0	0	0	0	0	0	0	0	0	0	0	0	0	0	0	0	0	0	0	0	0	1	0	0	0	0	1
rs2049019	0	1	0	0	0	0	0	0	0	0	0	0	0	1	1	0	0	0	0	0	0	0	0	0	0	0	0	0	0	3
rs2051076	0	0	0	0	0	0	0	0	0	0	0	0	0	1	0	0	0	1	0	0	0	0	0	0	0	0	0	0	0	2
rs2057069	0	0	0	0	0	0	1	1	0	0	0	0	0	0	0	0	0	0	0	0	0	0	0	0	0	0	0	0	0	2
rs2067749	0	0	0	0	1	0	0	0	1	0	0	1	0	0	0	0	1	0	1	0	0	0	0	0	0	0	0	0	0	5
rs2071047	0	0	0	0	0	0	0	0	0	0	0	0	0	0	0	1	0	0	0	0	0	0	0	0	0	0	0	0	0	1
rs2072090	0	0	0	0	0	0	0	0	0	0	0	0	0	0	0	0	0	0	1	0	0	0	0	0	0	0	0	0	0	1
rs2074291	0	0	1	0	0	0	1	1	0	0	0	0	0	0	0	0	1	0	1	0	0	1	1	0	0	0	0	0	0	7
rs2074292	0	0	0	0	1	0	0	0	0	0	0	0	0	0	0	0	0	0	0	0	0	0	0	0	0	0	0	0	0	1
rs209969	0	0	0	0	0	0	0	0	0	0	0	1	0	0	0	0	0	0	1	0	0	0	0	0	0	0	1	0	1	4
rs2131704	0	0	1	0	0	0	1	0	1	0	0	0	1	0	0	0	0	1	0	0	0	0	0	0	0	0	0	0	0	5
rs2144734	0	0	0	0	1	0	0	0	0	0	0	0	0	0	0	0	0	0	0	0	0	0	0	0	0	0	0	0	0	1
rs2151392	0	0	0	0	0	0	0	0	0	0	0	0	0	0	0	0	0	1	1	0	0	0	0	0	0	0	0	0	0	2
rs2151393	0	0	0	0	0	0	0	0	0	0	0	0	0	0	0	0	0	0	1	0	0	0	0	0	0	0	0	0	0	1
rs2159381	0	0	0	0	1	0	0	0	0	0	0	0	0	0	0	0	0	0	0	0	0	0	0	0	0	0	0	0	0	1
rs216364	0	0	0	0	0	0	1	1	0	0	0	0	1	0	1	0	1	1	1	0	0	0	0	0	0	1	1	0	0	9
rs2200160	1	1	0	0	1	1	1	1	0	0	0	0	1	0	0	0	0	0	1	1	0	1	1	1	1	0	1	0	1	15
rs2203002	0	0	0	0	0	0	0	0	0	0	0	1	0	0	0	0	0	0	0	0	0	0	0	0	0	0	0	0	0	1
rs2232003	0	0	0	0	1	0	0	0	0	0	0	0	0	0	0	0	0	0	0	0	0	0	0	0	0	0	0	0	0	1
rs2235826	0	0	0	0	0	0	0	0	0	0	1	0	0	0	0	0	0	0	1	0	0	0	0	0	0	0	0	0	1	3
rs2241009	0	0	0	0	0	0	0	0	0	0	0	0	0	0	0	0	0	0	1	0	0	0	0	0	0	0	0	0	1	2
rs2252281	1	0	0	1	1	0	1	1	1	1	0	0	1	0	0	0	1	1	1	1	0	0	1	1	1	0	0	1	1	17
rs2267043	0	0	0	0	0	0	1	0	0	0	0	0	0	0	0	0	0	0	0	0	0	0	0	0	0	0	0	0	0	1
rs2267372	1	1	1	0	1	1	1	0	1	1	1	1	1	1	0	1	1	1	0	0	1	0	1	1	0	0	1	0	0	19
rs2267373	0	0	0	0	0	0	0	0	0	0	0	0	0	0	0	0	0	0	0	0	0	0	0	0	1	0	0	0	0	1
rs2267375	0	0	0	1	0	0	1	0	1	0	1	0	1	0	1	0	0	1	0	1	0	1	1	0	1	1	1	0	0	13
rs2271271	0	0	0	0	0	0	0	0	0	0	0	0	0	0	0	0	0	0	0	0	0	0	1	0	0	0	0	0	0	1
rs2273905	0	0	0	0	1	0	0	1	0	0	0	1	0	0	0	1	0	0	0	0	0	1	1	0	0	0	1	0	0	7
rs227727	0	0	1	0	0	1	0	0	0	0	1	0	0	0	1	0	1	0	0	1	0	1	1	1	0	0	1	1	1	12
rs2277339	1	1	1	0	1	1	1	1	1	1	1	1	1	1	1	0	1	1	1	1	0	1	1	1	1	1	1	1	1	26
rs2277381	0	0	0	0	0	1	1	1	1	1	0	0	0	0	1	0	0	1	0	0	1	0	0	0	0	0	1	1	0	10
rs2279252	0	0	0	0	0	0	0	1	0	0	0	0	0	0	0	0	0	0	0	0	0	0	0	0	0	0	0	0	1	2
rs2280334	1	1	0	0	0	0	1	1	1	0	1	0	1	1	0	0	0	0	0	0	0	0	0	0	0	0	0	0	0	8
rs2281979	0	0	0	0	0	0	0	0	0	0	0	0	0	1	0	0	0	0	0	0	0	0	0	0	0	0	0	0	1	2
rs2288926	0	0	0	0	0	0	0	0	0	0	1	0	0	0	0	0	0	0	0	0	0	0	0	0	0	0	0	0	0	1
rs2291285	1	1	1	0	0	1	1	0	0	0	0	0	1	0	1	1	0	1	1	1	0	1	0	1	1	1	0	0	0	15
rs2293093	0	0	0	0	1	0	0	0	1	0	1	1	0	1	1	0	1	0	0	0	0	0	0	0	0	0	0	0	0	7
rs2302316	0	0	0	0	0	0	0	0	1	0	0	0	0	0	0	0	0	1	0	0	0	0	0	0	0	0	0	0	0	2
rs2302694	0	0	0	0	0	0	0	0	0	0	0	0	0	0	0	0	0	0	0	0	0	0	0	1	0	0	0	0	0	1
rs2304811	0	0	0	0	0	0	0	0	0	0	0	0	0	0	0	0	0	0	1	0	0	0	0	0	0	0	0	0	0	1
rs2326379	0	0	1	0	1	0	1	1	0	0	0	0	0	0	0	0	0	0	1	0	1	1	1	0	0	1	1	1	0	11
rs2337106	0	0	0	0	0	0	0	0	1	0	0	0	0	0	1	0	0	1	0	0	0	0	0	0	0	0	0	0	0	3
rs2364368	0	0	0	0	0	0	0	0	0	0	0	0	0	0	0	0	0	0	1	0	0	0	0	0	0	0	0	0	0	1
rs2403058	0	0	0	0	0	0	1	0	0	0	0	0	0	0	0	0	1	0	0	0	0	0	0	0	0	0	0	0	0	2
rs2405528	0	0	0	0	1	0	0	0	0	0	0	0	0	0	0	0	0	0	0	0	0	0	0	0	0	0	0	0	0	1
rs2427536	0	0	0	0	0	0	0	1	0	0	0	0	0	0	0	1	0	0	0	0	0	0	0	0	0	0	0	0	0	2
rs2486274	0	0	0	0	0	0	0	0	0	0	0	0	0	1	0	0	0	0	0	0	0	0	0	0	0	0	0	0	0	1
rs2503711	0	0	0	0	0	0	0	0	0	0	0	0	0	0	0	0	0	0	0	0	0	0	0	0	0	1	0	0	0	1
rs2509050	1	1	1	1	0	1	1	1	1	1	1	1	1	1	1	1	1	1	1	1	1	1	1	1	1	1	1	1	1	28
rs2522047	0	0	0	0	0	0	1	1	0	1	0	0	0	0	0	0	0	0	1	0	0	0	0	0	0	0	0	1	0	5
rs2522054	0	0	0	0	0	0	0	0	0	0	0	0	0	0	0	0	0	0	1	0	0	0	0	0	0	0	0	0	0	1
rs2530738	0	0	0	0	0	0	0	0	0	0	0	0	0	0	0	0	0	0	0	0	0	0	0	1	0	0	0	0	1	2
rs2551944	0	0	0	0	0	0	0	0	0	0	0	0	1	0	0	0	0	0	0	1	0	0	0	0	0	1	0	0	0	3
rs2562342	0	0	0	0	0	0	0	0	0	0	0	0	0	1	0	0	0	0	0	0	0	0	0	0	0	0	0	0	0	1
rs2588172	0	0	0	0	0	0	0	0	1	0	0	0	0	0	0	0	0	0	0	0	0	0	0	0	0	1	0	0	0	2
rs2608912	0	0	0	0	0	0	0	0	0	0	0	0	0	0	0	0	0	0	1	0	0	0	0	1	0	0	0	0	0	2
rs2625169	0	0	0	0	0	0	0	0	0	0	0	1	0	0	0	1	0	0	0	0	0	0	0	0	0	0	0	0	0	2
rs2682327	0	0	0	0	0	0	0	0	0	0	0	1	0	1	0	0	0	0	0	0	0	1	0	1	0	0	0	0	1	5
rs2706339	0	0	0	0	0	0	0	0	0	0	0	1	0	0	0	0	0	0	1	0	0	0	0	0	0	0	0	0	0	2
rs2706379	0	0	0	0	0	0	0	0	0	0	1	0	0	0	0	0	0	0	0	0	0	0	0	0	0	0	0	0	0	1
rs2706383	1	0	0	0	0	1	0	1	0	1	0	1	0	1	0	1	0	0	1	0	1	0	0	0	0	0	1	1	0	11
rs2706393	0	0	0	0	0	0	0	1	0	1	0	0	0	0	0	0	0	0	0	0	0	0	0	0	0	0	0	1	0	3
rs2732439	0	0	0	0	0	0	0	0	0	0	0	0	1	0	0	1	0	0	0	0	0	0	0	0	0	0	0	0	0	2
rs2749019	0	1	0	0	0	0	0	0	0	0	0	0	0	1	0	0	0	0	0	0	0	0	0	0	0	0	0	0	0	2
rs2749153	0	0	0	0	1	0	0	0	0	0	0	0	0	0	0	0	0	0	0	0	0	0	0	0	0	0	0	0	0	1
rs2756127	0	0	0	0	0	0	0	0	0	0	0	0	0	0	1	1	0	0	0	0	0	0	1	0	0	0	0	0	0	3
rs2762943	0	0	0	0	0	0	0	0	0	0	0	0	0	0	0	0	0	0	0	0	0	0	0	0	0	0	0	0	1	1
rs278937	0	0	0	0	0	0	0	0	0	0	0	1	0	0	0	0	0	0	1	0	0	0	0	0	0	0	1	0	1	4
rs278941	0	1	0	0	0	0	0	0	0	0	0	1	0	1	0	0	0	0	1	0	0	1	1	1	0	0	0	0	1	8
rs2803962	0	0	0	0	1	0	0	0	0	0	0	0	0	0	0	0	1	0	0	0	0	0	0	0	0	0	0	0	0	2
rs2815362	0	0	0	0	0	0	0	0	0	0	0	0	0	0	0	0	0	0	0	0	0	0	0	0	1	0	0	0	0	1
rs2815363	0	0	0	0	0	0	0	0	0	0	0	0	0	0	0	0	0	0	0	0	0	0	0	0	1	0	0	0	0	1
rs2823139	0	0	0	0	0	0	0	0	0	0	1	0	0	0	0	0	0	0	0	0	0	0	0	0	0	0	0	0	0	1
rs2834317	0	0	0	0	0	0	0	0	0	0	0	0	0	0	0	0	0	0	0	0	0	0	0	0	0	0	0	0	1	1
rs28377909	0	0	0	0	0	0	0	0	0	0	0	1	0	0	0	0	0	0	0	0	0	0	0	0	0	0	0	0	0	1
rs28544423	0	1	0	0	0	0	0	0	0	0	0	0	0	0	0	0	0	0	0	0	0	0	0	0	0	0	0	0	0	1
rs2855530	0	0	0	0	0	0	0	0	1	0	0	0	1	0	0	0	0	0	0	0	0	0	0	0	0	0	0	0	0	2
rs28566624	0	0	0	0	1	1	0	0	0	0	0	0	0	0	1	0	1	0	0	0	0	0	1	0	1	0	0	0	0	6
rs2869868	1	0	0	1	1	1	1	1	1	0	1	0	1	0	1	0	1	1	0	1	1	1	1	1	1	0	1	0	0	19
rs28910285	0	0	0	0	1	0	0	1	1	0	0	0	0	0	0	0	0	1	0	1	0	1	1	0	0	0	0	0	1	8
rs2906162	1	1	1	0	0	0	1	1	0	0	0	1	0	1	1	0	0	1	1	0	0	1	1	0	0	1	1	1	0	15
rs2909207	0	0	0	0	0	0	0	0	0	0	0	0	0	0	0	0	1	0	0	0	0	0	0	0	0	0	0	0	0	1
rs2914576	0	0	0	0	0	0	0	0	0	0	0	1	0	0	0	0	0	0	0	0	0	0	0	0	0	0	0	0	0	1
rs2921097	0	0	0	0	0	0	0	0	0	0	0	1	0	0	0	0	0	0	0	0	0	0	0	0	0	0	0	0	0	1
rs2924808	0	0	0	0	0	0	0	0	0	0	0	0	0	0	0	0	1	0	0	0	0	0	0	0	1	0	0	0	0	2
rs2932966	0	0	0	0	0	0	0	0	0	0	0	0	0	0	0	0	0	0	0	0	0	0	0	1	0	0	0	0	0	1
rs2952294	0	0	0	0	1	0	1	0	0	0	0	0	0	0	0	0	0	0	0	0	0	0	0	0	0	0	0	0	0	2
rs2953516	0	0	0	0	0	0	0	0	0	0	0	0	1	0	0	0	0	0	1	0	0	0	0	0	0	0	0	0	1	3
rs2976178	0	0	0	0	0	0	0	0	0	0	0	0	1	0	0	0	0	0	1	0	0	0	0	0	0	0	0	0	1	3
rs2991340	0	0	0	0	0	0	0	0	0	0	0	0	1	0	0	0	0	0	0	0	0	0	0	1	0	0	0	0	1	3
rs308951	0	0	0	0	0	0	0	0	0	0	1	0	0	0	0	0	0	0	0	0	0	0	0	0	0	0	0	0	0	1
rs3120046	0	0	0	0	0	0	0	1	0	0	0	0	0	0	0	0	0	0	0	0	0	1	0	0	0	0	0	0	0	2
rs316009	0	1	0	0	0	0	0	0	0	0	0	1	0	1	0	0	0	0	1	0	0	0	0	0	0	0	1	0	0	5
rs337642	0	0	0	0	0	0	0	0	0	0	0	1	0	0	0	0	0	0	0	0	0	0	0	0	0	0	0	0	0	1
rs33982895	0	0	0	0	0	0	0	0	0	0	0	0	0	0	0	0	0	0	0	0	0	0	0	1	0	0	0	0	0	1
rs34109355	0	1	0	0	0	0	0	0	0	1	0	0	0	0	0	0	0	0	0	0	0	0	0	0	0	0	0	1	1	4
rs34117451	1	0	0	0	0	0	0	0	1	0	0	0	0	0	0	0	1	0	0	0	0	0	0	1	1	0	0	0	0	5
rs34188292	0	0	1	0	0	0	0	0	0	0	0	0	0	0	0	1	0	0	0	0	0	0	0	0	0	0	0	0	0	2
rs34219462	0	0	1	0	0	0	0	0	0	0	0	0	0	0	0	0	0	0	0	0	0	0	0	0	0	0	0	0	0	1
rs34221697	0	0	1	1	0	0	0	0	0	1	1	0	1	1	0	0	0	0	0	0	0	0	1	1	1	0	0	0	0	9
rs34398255	0	0	0	0	0	0	0	0	0	0	0	0	0	0	0	0	0	0	0	1	0	0	0	0	0	0	1	0	0	2
rs34446110	0	0	0	0	0	0	0	0	0	0	1	0	0	0	0	0	0	0	0	0	0	0	0	0	0	0	0	0	0	1
rs34468408	1	0	1	0	0	0	1	1	0	0	0	0	0	0	0	0	0	1	1	0	0	0	0	1	1	0	0	0	0	8
rs34611728	0	0	0	1	0	0	0	0	0	0	0	0	0	0	0	0	0	0	0	0	0	0	0	0	0	0	0	0	0	1
rs34623502	1	0	0	0	0	0	0	0	1	0	0	0	0	0	0	0	1	0	0	0	0	0	0	1	1	0	0	0	0	5
rs34659927	0	0	0	0	1	0	1	1	1	0	0	0	0	0	0	0	1	0	0	0	0	0	0	0	0	0	0	0	0	5
rs34666525	0	0	0	0	0	0	0	0	0	0	0	0	0	0	0	0	1	0	0	0	0	0	0	0	0	0	0	0	0	1
rs34673027	0	0	0	0	0	0	0	0	0	0	0	1	0	0	0	0	0	0	0	0	0	0	0	0	0	0	0	0	0	1
rs34685754	1	1	1	1	1	0	1	1	0	1	1	1	1	0	1	1	1	1	1	0	0	0	0	1	1	1	0	1	0	20
rs34721481	0	0	1	0	0	0	0	0	0	0	0	0	0	0	0	0	0	0	0	0	0	0	0	0	0	1	0	0	0	2
rs34773350	0	0	0	0	0	0	0	0	0	1	0	0	0	0	0	0	0	0	1	0	0	1	0	1	0	0	0	1	1	6
rs34861762	0	0	0	0	0	0	0	0	0	0	0	0	0	0	0	0	0	0	0	0	0	0	0	1	0	0	0	0	0	1
rs34976233	0	0	0	0	0	0	0	0	0	0	0	0	0	0	0	0	0	0	0	0	0	0	0	0	0	0	0	0	1	1
rs34986803	0	1	0	1	0	0	0	0	0	0	1	0	0	0	0	0	0	0	1	0	0	0	1	1	1	0	0	0	1	8
rs35013594	0	0	0	0	0	0	0	0	0	0	0	0	0	0	0	0	0	0	0	0	0	0	0	0	0	0	0	0	1	1
rs35069969	0	0	0	0	0	0	0	0	0	0	0	0	0	0	0	1	0	0	0	0	0	0	0	0	0	0	0	0	0	1
rs35094860	0	0	0	0	0	0	0	0	0	0	0	0	0	0	0	0	0	0	0	0	0	0	0	0	0	0	0	0	1	1
rs35096434	1	0	0	0	0	0	0	0	1	0	0	0	0	0	0	0	1	0	0	0	0	0	0	1	1	0	0	0	0	5
rs35154268	1	0	0	0	0	0	0	0	0	0	0	0	0	0	0	0	0	0	0	0	0	0	0	0	0	0	0	0	0	1
rs35289683	0	0	0	0	0	0	0	0	0	0	0	1	0	0	0	0	0	0	0	0	0	0	0	0	0	0	0	0	0	1
rs35320690	0	0	0	0	0	0	0	0	0	0	0	0	0	0	0	0	0	0	1	0	0	0	0	0	0	0	0	0	0	1
rs35371915	0	0	0	0	0	0	0	0	0	0	0	0	0	0	0	0	0	0	1	0	0	0	0	0	0	0	0	0	1	2
rs35411989	0	0	0	0	0	0	0	0	0	0	0	0	0	0	0	0	0	0	0	0	0	0	0	0	1	0	0	0	0	1
rs35440573	0	0	0	0	0	0	0	0	0	0	0	0	0	0	0	0	0	0	0	0	0	0	0	0	1	0	0	0	0	1
rs35509903	0	0	0	0	0	0	0	0	0	0	0	0	0	0	0	0	0	0	1	0	0	0	0	0	0	0	0	0	0	1
rs35650976	0	0	0	0	1	0	0	0	0	0	0	0	0	0	0	0	0	0	0	0	0	0	0	0	0	0	0	0	0	1
rs35861938	0	1	0	0	0	0	0	0	0	0	0	1	0	1	0	0	0	0	1	0	0	1	0	1	0	0	0	0	1	7
rs35908001	0	0	0	0	0	0	0	0	0	0	0	0	0	0	0	0	0	0	0	0	0	0	0	0	0	0	0	0	1	1
rs35950888	1	1	0	0	0	0	0	0	1	0	0	0	0	0	1	0	0	1	1	0	0	0	0	1	0	0	0	0	0	7
rs36051007	0	0	0	0	0	0	0	0	0	0	0	0	0	0	0	0	1	0	0	0	0	0	0	0	0	0	0	0	0	1
rs36074840	0	0	0	0	0	0	0	0	0	0	0	0	1	0	0	0	0	0	0	0	0	0	0	0	0	0	0	0	0	1
rs36081182	0	0	0	0	0	0	0	0	0	0	0	0	0	0	0	0	0	0	1	0	0	0	0	0	0	0	1	0	1	3
rs3736165	1	1	0	1	0	0	1	1	0	0	0	0	1	0	1	1	0	0	1	0	0	0	0	0	0	1	0	1	0	11
rs3736167	1	1	0	1	1	0	1	1	1	1	1	1	1	1	1	1	1	1	1	0	0	0	0	1	0	1	0	1	0	20
rs3750081	0	0	0	0	1	0	0	1	0	0	0	0	0	1	0	1	0	0	0	0	0	1	0	0	0	0	1	0	0	6
rs3758076	1	0	1	1	1	1	1	1	1	1	1	0	1	1	1	1	1	1	1	1	1	1	1	1	1	1	1	1	1	27
rs3758077	1	0	0	1	1	1	0	1	1	1	1	0	1	0	1	1	1	1	1	1	1	0	1	1	0	1	0	1	1	21
rs3760230	0	0	0	0	0	0	0	0	0	0	0	0	0	0	1	0	0	0	0	0	0	0	0	0	0	0	0	0	0	1
rs3774719	0	0	0	0	0	0	0	0	0	0	0	0	0	0	0	0	0	0	0	0	0	0	0	1	0	0	0	0	0	1
rs3775932	0	1	0	0	0	0	0	0	0	0	0	1	0	0	0	0	0	0	0	0	0	0	0	0	0	0	1	0	1	4
rs3778030	0	0	0	0	0	0	0	0	0	0	0	0	0	1	0	0	1	0	0	0	0	0	0	0	0	0	0	0	0	2
rs3778751	0	0	0	0	0	0	0	0	1	0	0	0	0	0	0	0	0	0	0	0	0	0	0	0	0	0	0	0	0	1
rs3778752	0	0	0	0	0	0	0	0	1	0	0	0	0	0	0	0	0	0	0	0	0	0	0	0	0	0	0	0	0	1
rs3778753	0	0	0	0	0	0	0	0	1	0	0	0	0	0	0	0	0	0	0	0	0	0	0	0	0	0	0	0	0	1
rs3782232	1	0	1	0	1	0	0	0	0	0	0	0	0	0	0	0	1	0	0	0	0	0	0	0	0	0	0	0	0	4
rs3784671	0	0	0	0	0	0	0	0	0	0	0	0	0	0	0	1	0	0	0	0	0	0	0	0	0	0	0	0	0	1
rs3790585	0	1	0	0	0	0	0	0	0	0	0	0	0	1	0	0	0	0	1	0	0	0	0	0	0	0	0	0	0	3
rs3795758	0	0	0	0	0	0	0	0	0	0	0	1	0	0	0	0	0	0	0	0	0	0	0	0	0	0	0	0	0	1
rs3795759	0	0	0	0	0	0	0	0	0	0	0	1	0	0	0	0	0	0	0	0	0	0	0	0	0	0	0	0	0	1
rs3798168	1	0	0	0	0	0	0	0	0	0	0	0	0	0	0	0	0	0	0	0	0	0	0	0	0	0	0	0	0	1
rs3798488	0	1	0	0	0	0	0	0	0	0	0	1	0	0	0	0	0	0	0	0	0	0	0	0	0	0	0	0	1	3
rs3806688	0	0	0	0	0	0	0	0	0	0	0	0	0	0	0	0	0	0	0	0	0	0	0	0	0	0	0	0	1	1
rs3806689	0	0	0	0	0	0	0	0	0	0	0	0	0	0	0	0	0	0	1	0	0	0	0	0	0	0	0	0	1	2
rs3809627	1	1	1	1	0	1	0	1	0	1	0	1	1	1	0	1	0	0	1	1	0	1	1	1	1	1	1	1	1	21
rs3810182	0	0	0	0	1	0	0	0	0	0	0	0	0	1	1	0	0	1	0	0	0	0	0	0	0	0	0	0	0	4
rs3814863	0	0	0	0	0	0	0	1	0	0	0	0	0	0	0	0	0	0	0	0	0	0	0	0	0	0	0	0	0	1
rs3814864	0	0	0	0	1	0	1	0	0	0	0	0	0	0	0	0	1	0	0	0	0	0	0	0	0	0	0	0	0	3
rs3814866	1	1	1	1	1	1	1	1	1	1	1	1	1	1	1	1	1	1	1	1	1	1	1	1	1	1	1	1	1	29
rs3814995	0	1	0	0	0	0	0	0	0	0	0	0	0	1	0	0	0	0	0	0	0	0	0	0	0	0	0	0	0	2
rs3815455	1	0	0	0	0	0	1	1	0	0	0	0	1	0	0	0	0	0	0	0	0	0	0	0	0	0	0	0	0	4
rs3820201	0	0	0	0	0	0	0	0	0	0	0	0	1	0	0	0	0	0	0	0	0	0	0	0	0	1	0	0	0	2
rs3823536	0	0	0	0	0	0	0	0	0	1	0	0	0	0	1	0	0	0	0	0	0	0	0	0	0	0	0	1	0	3
rs3824765	0	0	0	0	0	0	0	0	1	0	1	0	1	0	1	0	0	1	0	0	0	0	0	0	0	0	0	0	0	5
rs3842763	0	0	0	0	0	0	0	0	0	0	0	0	0	0	0	0	0	0	1	0	0	0	0	0	0	0	0	0	0	1
rs3846221	0	1	0	0	0	0	0	0	0	0	0	0	0	0	0	0	0	0	0	0	0	0	0	0	0	0	0	0	0	1
rs3904600	1	1	1	0	1	1	1	0	1	1	1	1	1	0	1	0	1	1	0	1	0	0	0	0	1	0	1	0	0	17
rs3918226	0	0	0	0	0	0	0	0	1	0	0	0	0	0	0	0	0	0	1	0	0	0	0	0	0	0	0	0	0	2
rs3961283	0	0	0	0	1	0	0	0	0	0	1	0	0	0	1	0	0	0	0	0	0	0	0	0	0	1	0	0	0	4
rs398222	0	0	0	1	1	0	1	1	1	0	0	0	0	0	1	0	1	1	0	1	0	0	1	0	1	0	1	0	0	12
rs400132	0	0	1	0	0	0	0	0	0	0	0	0	0	0	0	0	0	0	0	0	0	0	0	0	0	0	0	0	0	1
rs4053282	0	0	0	0	1	0	0	0	0	0	0	0	0	0	1	0	0	0	0	0	0	0	0	1	0	0	0	0	0	3
rs41284816	0	0	0	1	0	0	0	1	0	0	1	0	0	0	0	0	0	1	0	0	0	0	0	0	1	0	0	0	0	5
rs41301394	1	0	0	0	0	0	0	0	0	0	0	0	0	0	0	0	1	0	0	0	0	0	0	0	0	0	0	0	0	2
rs4226	0	0	0	0	0	0	1	0	0	0	0	0	1	0	0	0	0	1	0	0	0	0	0	0	0	0	0	0	0	3
rs4238961	1	0	0	0	0	0	0	0	1	0	0	1	1	1	0	0	1	1	0	0	0	0	0	0	0	0	0	0	0	7
rs4245230	0	0	0	0	0	0	0	0	0	0	0	0	0	0	0	0	0	0	0	0	0	0	0	0	1	0	0	0	0	1
rs4347628	0	0	1	0	0	0	0	0	0	0	0	0	0	0	0	0	0	0	0	0	0	0	0	0	0	0	0	0	0	1
rs4434960	1	0	0	0	0	0	0	0	0	0	0	0	0	0	0	0	0	0	0	0	0	0	0	0	0	0	0	0	0	1
rs4472083	0	0	0	0	0	0	1	0	0	0	0	0	0	0	1	0	0	1	0	0	0	0	0	0	0	0	0	0	0	3
rs4510001	0	0	0	0	0	0	0	1	0	0	0	0	0	0	0	0	0	0	1	0	0	0	0	0	0	0	0	0	1	3
rs4531856	1	0	1	0	0	1	1	0	0	1	1	0	1	1	1	0	0	1	0	1	0	0	0	1	0	0	1	0	0	13
rs4540689	0	0	0	0	0	0	0	0	0	0	0	1	0	0	0	0	0	0	0	0	1	0	0	0	0	0	1	0	1	4
rs4551194	0	0	0	0	0	0	0	0	0	0	0	0	0	0	0	1	0	0	1	0	0	1	0	0	0	0	0	0	0	3
rs4569707	1	1	1	0	1	1	1	1	1	1	1	1	1	1	1	1	1	0	1	1	1	1	1	1	1	1	1	1	1	27
rs4572597	0	0	0	0	1	0	0	0	0	0	0	0	0	0	0	0	0	0	0	0	0	0	0	0	0	0	0	0	0	1
rs4689304	0	0	0	0	0	0	0	0	0	0	0	0	0	0	0	0	0	0	0	0	1	0	0	0	0	0	0	0	0	1
rs4705067	0	0	1	0	0	0	0	0	0	0	0	0	0	0	0	0	0	0	0	0	0	0	0	0	0	0	0	0	0	1
rs474513	0	0	0	0	0	0	0	0	0	0	0	0	0	0	0	0	0	0	1	0	0	0	0	0	0	0	0	0	0	1
rs4752689	0	0	0	0	0	0	1	1	0	0	0	0	0	0	0	0	0	0	0	0	0	0	0	0	0	0	0	0	0	2
rs4771080	0	0	0	0	0	0	0	0	0	0	0	0	0	0	0	0	0	0	1	0	0	0	0	0	0	0	0	0	0	1
rs4776343	0	0	0	0	1	0	0	0	0	0	0	0	1	0	0	0	0	0	0	0	0	0	0	0	0	0	0	0	0	2
rs4782652	0	0	0	0	0	0	0	0	0	0	0	1	0	1	0	0	0	0	0	0	0	0	0	1	0	0	0	0	0	3
rs4785574	0	1	0	0	0	0	0	0	0	1	0	1	0	1	0	1	0	0	0	0	0	1	1	1	0	0	1	1	0	10
rs4790311	0	0	0	0	0	0	0	0	1	0	0	0	1	0	1	0	0	1	0	0	0	0	0	0	0	0	0	0	0	4
rs4809331	1	1	1	1	1	1	1	1	0	1	1	1	1	0	0	1	0	0	1	1	1	1	1	1	1	1	1	1	1	24
rs4810312	0	0	0	1	1	0	0	1	0	0	0	0	1	0	0	1	0	0	1	0	1	0	0	0	0	1	1	1	1	11
rs4812488	0	0	0	0	1	1	0	0	0	0	0	0	0	0	0	0	1	0	0	0	0	0	0	0	0	0	0	0	0	3
rs4820323	0	0	0	0	0	0	0	0	0	0	0	0	0	0	1	0	0	1	0	0	0	0	0	0	0	0	0	0	0	2
rs4820324	0	0	0	0	0	0	0	0	0	0	0	0	0	0	1	0	0	1	0	0	0	0	0	0	0	0	0	0	0	2
rs4820325	0	0	0	0	0	0	0	0	0	0	0	0	0	0	1	0	0	1	0	0	0	0	0	0	0	0	0	0	0	2
rs4821764	0	0	1	0	0	1	0	0	0	1	0	0	0	0	0	0	0	0	0	0	0	0	0	0	0	0	0	0	0	3
rs4837197	0	0	0	0	0	0	1	1	0	0	0	0	1	0	0	0	0	0	0	0	0	0	0	0	1	0	0	0	0	4
rs4837613	0	0	0	0	0	0	0	0	0	0	0	0	0	0	0	0	0	0	0	0	0	0	0	0	0	0	0	0	1	1
rs4900538	0	0	0	0	0	0	0	0	0	0	0	1	0	0	0	0	0	0	0	0	0	0	0	0	0	0	1	0	0	2
rs4918943	0	0	0	0	1	1	1	1	0	0	0	0	1	1	1	0	0	1	1	0	0	1	1	0	1	0	0	0	0	12
rs4925389	0	0	0	0	1	0	0	0	0	0	0	0	0	0	0	0	1	0	0	0	0	0	0	0	0	0	0	0	0	2
rs4966019	0	0	0	0	0	0	0	0	0	0	0	0	0	0	0	0	1	0	0	0	0	0	0	0	0	0	0	0	0	1
rs513374	0	0	1	0	0	1	1	1	0	0	0	0	0	0	0	0	0	1	1	0	1	1	0	0	0	0	0	0	0	8
rs529224	1	0	1	0	1	0	0	0	0	1	0	1	0	0	0	1	0	0	0	0	0	0	1	0	0	0	0	0	0	7
rs530081	1	1	1	1	1	1	1	1	1	1	1	1	1	1	1	1	1	1	1	1	1	1	1	1	1	1	1	1	1	29
rs539298	0	0	0	0	0	0	0	0	0	0	0	0	0	0	0	0	0	0	1	0	0	0	0	0	0	0	0	0	0	1
rs555754	1	0	0	1	1	1	0	0	0	1	0	0	1	1	0	0	0	0	1	1	0	0	1	1	1	0	1	1	1	15
rs55678693	0	0	0	1	1	1	0	1	0	0	0	0	1	0	0	1	1	0	0	1	0	1	1	0	0	0	0	0	0	10
rs55748426	1	0	0	1	1	1	0	0	0	0	0	0	0	0	0	0	0	0	1	0	1	0	0	1	0	0	0	0	1	8
rs55775223	0	0	0	0	0	0	0	0	0	1	0	0	0	0	0	0	0	0	0	0	0	0	0	0	0	0	0	1	0	2
rs56059431	0	0	0	0	1	0	1	1	1	0	0	0	1	0	0	0	1	0	0	0	0	0	0	0	1	1	0	0	0	8
rs56192634	0	0	0	1	0	1	1	1	1	0	0	0	1	0	1	1	1	1	0	1	0	1	1	0	1	0	1	0	0	15
rs56255430	1	1	1	1	1	1	1	1	1	1	1	1	1	1	1	0	1	1	1	1	0	1	0	1	1	0	1	1	1	25
rs56343043	0	0	0	0	1	0	0	0	0	0	0	0	0	0	0	0	0	0	0	0	0	0	0	0	0	0	0	0	0	1
rs56398805	0	0	0	0	0	0	0	0	0	0	0	0	0	0	0	0	0	0	1	0	0	0	0	0	0	0	0	0	0	1
rs566408	0	0	0	0	1	0	1	0	0	0	0	0	0	0	0	0	1	0	1	0	0	0	0	0	0	0	0	0	0	4
rs57345461	0	0	0	0	1	0	0	0	0	0	0	0	0	0	0	0	0	0	0	0	0	0	0	0	0	0	0	0	0	1
rs57542652	0	0	0	0	0	0	0	0	0	0	0	0	0	0	0	0	0	0	0	0	0	0	0	0	0	0	0	0	1	1
rs58028847	0	0	0	0	0	0	1	1	1	0	0	0	0	0	0	0	1	1	0	0	0	0	0	0	0	0	0	0	0	5
rs58067379	0	0	0	0	0	1	0	0	0	0	0	0	0	0	0	0	0	0	0	0	0	0	0	0	0	0	0	0	0	1
rs59419422	0	0	0	0	0	0	0	0	0	0	0	0	0	0	1	0	0	0	0	0	0	0	0	0	0	0	0	0	0	1
rs59471264	0	0	0	0	0	0	0	0	0	0	0	0	0	0	0	0	0	0	1	0	0	0	0	0	0	0	0	0	1	2
rs59521949	0	0	0	0	0	1	0	0	0	0	0	0	0	0	0	0	0	0	0	0	0	0	0	0	0	0	0	0	0	1
rs6055748	0	0	0	0	0	0	0	0	0	0	0	0	0	0	0	0	0	0	0	0	0	0	0	0	0	0	0	0	1	1
rs6062343	1	0	0	0	0	0	0	0	0	0	0	0	0	0	0	0	0	0	1	0	0	0	0	0	0	0	0	0	0	2
rs6062344	0	0	0	0	0	0	0	0	0	0	0	0	0	0	0	0	0	0	1	0	0	0	0	0	0	0	0	0	0	1
rs6062357	0	0	0	0	0	0	0	0	0	0	0	0	1	0	0	0	0	0	0	0	0	0	0	0	0	0	1	0	0	2
rs608444	1	0	0	0	0	0	0	1	0	1	1	0	0	0	0	0	0	0	0	0	0	0	0	0	0	0	0	1	0	5
rs6120747	0	0	0	0	1	0	0	0	0	0	0	0	0	0	0	0	1	0	0	0	0	0	0	0	0	0	0	0	1	3
rs61311941	0	0	0	0	0	0	0	0	0	0	0	0	0	0	0	0	0	0	1	0	0	0	0	0	0	0	0	0	0	1
rs61327861	0	0	0	0	0	0	0	0	0	0	0	0	0	0	1	0	0	1	0	1	0	0	0	0	0	1	0	0	0	4
rs61675795	0	0	0	0	0	1	0	1	0	0	0	0	0	0	1	0	1	1	0	0	0	0	0	0	1	0	0	0	0	6
rs61927768	1	1	1	1	1	1	1	1	1	1	1	0	1	1	1	0	1	1	1	1	1	1	1	0	1	1	1	1	1	26
rs62073415	1	0	0	0	0	0	0	0	1	0	0	0	0	0	0	0	0	0	0	0	0	0	0	0	0	0	0	0	0	2
rs62127893	0	0	0	0	0	0	1	0	0	0	0	0	0	0	0	0	0	0	0	0	0	0	0	0	1	0	0	0	0	2
rs62127894	0	0	0	0	0	0	0	0	0	0	0	0	0	0	0	0	1	0	0	0	0	0	0	0	0	0	0	0	0	1
rs62385693	1	0	0	0	0	1	1	1	1	1	1	0	1	0	0	0	0	0	0	1	1	0	1	1	0	0	1	1	1	15
rs6438865	0	0	0	0	0	0	0	0	1	0	0	0	0	0	0	0	0	0	0	0	0	0	0	0	0	0	0	0	0	1
rs6464126	0	0	0	0	0	0	1	0	0	0	1	0	0	1	0	1	0	0	0	0	0	0	0	0	0	0	0	0	0	4
rs6467228	0	1	0	0	0	0	0	0	0	0	0	1	0	1	0	0	0	0	1	0	0	0	0	0	0	0	0	0	1	5
rs6467229	0	1	0	0	0	0	0	0	0	0	0	1	0	1	0	0	0	0	1	0	0	0	0	0	0	0	0	0	1	5
rs6486336	0	1	0	0	0	0	0	0	0	0	0	0	0	0	1	0	0	0	1	0	0	0	0	0	1	0	1	1	1	7
rs6492993	0	0	0	0	1	0	0	0	0	0	0	0	0	0	0	0	1	0	0	0	0	0	0	0	0	0	0	0	0	2
rs6501468	0	0	0	0	0	0	1	0	0	0	0	0	0	0	0	0	0	0	0	0	0	0	0	0	0	0	0	0	0	1
rs6512309	0	0	0	0	0	0	0	0	0	0	0	0	1	0	0	0	0	0	0	0	0	0	0	0	0	0	1	0	0	2
rs6513714	0	0	0	0	0	0	0	0	0	0	0	0	0	0	0	0	1	0	0	0	0	0	0	0	0	0	0	0	0	1
rs6546230	1	1	0	0	0	1	0	0	0	0	0	0	0	1	0	0	0	0	0	1	0	0	1	0	0	0	0	0	0	6
rs655185	0	0	0	0	0	0	0	0	0	0	0	0	0	0	0	0	0	0	1	0	0	0	0	0	0	0	0	0	0	1
rs6573788	1	0	0	1	1	1	0	0	0	0	0	0	0	0	1	1	0	0	0	1	0	0	1	1	1	0	0	0	0	10
rs6580598	0	0	0	0	1	0	1	1	1	1	1	0	0	0	0	0	1	1	1	0	0	0	0	1	1	0	0	1	1	13
rs6585309	0	0	0	0	1	0	0	0	0	0	0	0	0	0	0	0	1	0	0	0	0	0	0	0	0	0	0	0	0	2
rs6598541	1	1	1	1	1	1	1	1	1	1	1	1	1	1	1	1	1	1	0	1	0	1	1	1	1	0	1	1	1	26
rs660240	0	1	0	0	1	0	0	0	0	0	0	0	0	1	0	0	1	0	0	0	0	0	0	0	0	0	0	0	0	4
rs665731	0	0	0	0	1	0	0	1	0	0	0	0	0	0	0	0	0	1	0	0	0	0	0	0	0	0	0	0	0	3
rs6657897	0	0	0	0	0	0	0	0	0	0	0	0	0	0	0	0	0	0	1	0	0	0	0	0	0	0	0	0	0	1
rs6658336	0	0	0	0	0	0	0	0	0	0	0	0	0	0	0	0	0	0	0	0	0	0	0	0	0	0	0	0	1	1
rs6663638	0	0	0	0	0	0	0	0	0	0	0	1	0	0	0	0	0	0	0	0	0	0	0	0	0	0	0	0	0	1
rs6663745	0	0	0	0	0	0	0	0	0	0	0	1	0	0	0	0	0	0	0	0	0	0	0	0	0	0	0	0	0	1
rs6669460	0	1	0	0	1	0	1	1	1	0	0	1	0	1	0	1	1	1	0	0	0	1	0	0	0	0	1	0	0	12
rs66941667	0	0	0	0	1	0	0	0	0	0	0	0	0	0	0	0	1	0	1	0	0	0	0	0	0	0	0	0	1	4
rs6699769	0	1	0	0	0	0	0	0	0	0	0	0	0	1	0	0	0	0	0	0	0	0	0	0	0	0	0	0	0	2
rs6700747	0	0	0	0	0	0	0	0	0	0	0	0	0	0	0	1	0	0	0	0	0	0	0	0	0	0	0	0	0	1
rs6706968	0	0	0	0	1	0	0	0	0	0	1	0	0	0	0	0	0	0	0	0	0	0	0	0	0	0	0	0	0	2
rs67087164	0	0	1	0	0	0	0	0	0	0	0	0	0	0	0	1	1	0	0	0	0	0	0	0	0	0	0	0	0	3
rs67156055	0	0	0	0	0	0	0	0	0	0	0	0	0	0	0	0	1	0	0	0	0	0	0	0	0	0	0	0	0	1
rs67205506	0	0	0	0	1	0	0	0	0	0	0	0	0	0	0	0	1	0	1	0	0	0	0	0	0	0	0	0	1	4
rs6721666	0	0	0	0	0	0	0	0	0	0	0	0	0	0	0	0	0	0	0	0	0	0	0	1	0	0	0	0	0	1
rs6738144	1	1	0	0	0	1	0	0	0	0	0	0	0	1	0	0	0	0	0	1	0	0	1	0	0	0	0	0	0	6
rs6747041	0	0	0	0	0	0	1	0	1	0	0	0	0	0	0	0	0	0	0	0	0	0	0	0	0	0	0	0	0	2
rs6749936	1	0	1	0	0	1	1	0	1	0	0	0	1	0	1	0	0	0	1	1	0	0	1	0	0	0	1	0	0	11
rs6761645	1	1	0	1	1	1	0	1	0	1	1	1	0	1	0	0	1	1	1	0	1	1	0	1	1	1	0	0	1	19
rs6768050	0	0	0	0	0	0	0	0	0	0	0	0	0	0	0	1	0	0	0	0	0	0	0	0	0	0	0	0	0	1
rs6778297	0	0	0	0	0	0	0	0	0	0	0	0	0	0	0	0	0	1	0	0	1	0	0	0	0	0	0	0	0	2
rs67817891	0	0	0	0	1	0	0	0	0	0	0	0	0	0	0	0	1	0	1	0	0	0	0	0	0	0	0	0	1	4
rs67957569	0	0	1	0	0	0	0	0	0	0	0	0	0	0	0	1	0	0	0	0	0	0	0	0	0	0	0	0	0	2
rs68101867	0	0	0	0	0	0	0	0	0	0	0	0	0	0	0	0	1	0	0	0	0	0	0	0	0	0	0	0	0	1
rs6880621	0	0	1	1	0	0	0	0	0	0	0	0	0	0	0	1	0	0	0	0	0	0	0	0	0	0	0	0	0	3
rs688540	0	0	0	0	0	0	0	0	0	0	0	1	0	0	0	0	0	0	0	0	0	0	0	0	0	0	0	0	0	1
rs6892	1	0	0	1	1	1	1	1	1	1	1	0	0	0	1	0	1	1	1	1	0	1	1	1	1	1	1	0	0	20
rs6898254	0	0	0	0	0	0	0	0	0	0	0	0	0	0	0	0	0	0	0	0	0	0	0	0	0	0	0	0	1	1
rs6910463	0	0	0	0	0	0	0	0	0	0	0	0	0	0	0	0	0	0	0	0	0	0	0	1	0	0	0	0	1	2
rs6921396	0	0	0	0	0	0	0	1	0	0	1	0	0	0	0	0	0	0	0	0	0	0	0	0	1	0	0	0	0	3
rs6966609	0	0	0	0	1	0	0	0	0	0	0	0	0	0	0	0	0	0	0	0	0	0	0	0	0	0	0	0	0	1
rs6979763	0	0	0	0	0	0	0	0	0	0	0	1	0	0	0	0	0	0	0	0	0	0	0	0	0	0	0	0	0	1
rs6980196	0	0	0	0	0	0	0	0	0	0	0	1	0	0	0	0	0	0	0	0	0	0	0	0	0	0	0	0	0	1
rs6980328	0	0	0	0	0	0	0	0	0	0	0	1	0	0	0	0	0	0	0	0	0	0	0	0	0	0	0	0	0	1
rs6985555	0	1	0	0	0	1	0	0	1	0	0	0	0	1	0	0	0	0	0	0	0	0	0	0	0	1	0	0	0	5
rs6987335	0	0	0	0	0	0	0	0	0	0	0	0	0	0	0	1	0	0	0	0	0	0	0	0	0	0	0	0	0	1
rs700750	0	1	0	0	0	0	0	0	0	0	0	1	0	1	0	0	0	0	1	0	0	1	0	0	0	0	0	0	1	6
rs700753	0	1	0	0	0	0	0	0	0	0	0	1	0	1	0	0	0	0	1	0	0	1	0	0	0	0	0	0	1	6
rs7007986	0	0	1	0	0	0	0	0	0	1	0	1	0	1	0	0	0	0	0	0	0	0	0	0	0	0	1	1	0	6
rs707555	0	0	0	0	0	0	0	0	0	0	0	1	0	0	0	0	0	0	1	0	0	0	0	0	0	0	0	0	0	2
rs708563	0	0	0	0	1	0	0	0	0	0	1	0	0	0	0	0	1	0	0	0	0	0	0	0	0	0	0	0	0	3
rs7101680	1	1	0	0	1	0	1	0	0	1	1	0	1	0	1	0	1	0	1	1	1	1	1	1	1	0	1	0	0	17
rs7110576	0	1	0	0	0	0	0	0	0	0	0	1	0	0	0	0	0	0	0	0	0	0	0	0	0	0	0	0	0	2
rs71321862	1	0	0	0	1	0	0	1	1	1	0	1	1	1	0	0	0	0	0	1	1	0	0	1	0	0	0	1	0	12
rs71321863	0	0	1	0	0	0	0	0	0	0	0	0	0	0	0	0	0	0	0	0	0	0	0	0	0	1	0	0	0	2
rs7176522	0	0	0	0	0	0	0	0	0	0	0	0	0	0	0	0	0	0	1	0	0	0	0	0	0	0	0	0	1	2
rs7180968	0	0	0	0	0	0	0	0	0	0	0	0	0	0	1	0	0	0	0	0	0	0	0	0	0	0	0	0	0	1
rs7187776	1	1	1	1	1	1	1	1	1	1	1	1	1	1	1	1	1	1	1	1	1	1	1	1	1	1	1	1	1	29
rs7202714	0	0	0	0	0	0	0	0	0	1	0	0	0	0	0	0	0	0	0	0	0	0	0	0	0	0	0	0	0	1
rs7208899	1	0	0	0	0	0	0	0	0	0	0	0	0	0	0	0	0	0	0	0	0	0	0	0	0	0	0	0	0	1
rs7211777	0	0	0	0	1	0	0	0	0	0	0	0	0	0	0	0	1	0	0	0	0	0	0	0	0	0	0	0	0	2
rs7228414	0	0	0	0	1	0	0	0	0	0	0	0	0	0	0	0	0	0	0	0	0	0	0	0	0	0	0	0	0	1
rs724016	0	0	0	0	0	0	0	0	0	0	0	0	0	0	0	0	0	0	0	0	0	0	0	1	0	0	0	0	0	1
rs72478544	0	0	1	0	0	0	1	1	0	0	0	0	0	0	0	0	0	0	0	0	0	0	0	0	1	1	1	0	0	6
rs7255254	1	1	1	1	1	1	1	1	1	1	1	1	1	1	1	1	1	1	1	1	0	1	1	1	1	1	1	1	1	28
rs7258963	0	0	0	0	0	0	0	0	1	1	0	1	1	1	1	0	0	1	0	0	0	1	0	0	0	0	1	1	0	10
rs72629024	0	0	0	0	1	0	1	1	0	0	1	0	1	1	1	1	1	1	0	0	0	0	0	0	0	0	0	0	0	10
rs72646553	1	1	1	1	1	1	1	1	1	1	1	1	1	1	1	1	0	1	1	1	0	1	1	1	1	1	1	1	1	27
rs72695707	0	0	0	0	1	0	0	0	0	0	0	0	0	0	0	0	1	0	0	0	0	0	0	0	0	0	0	0	0	2
rs72697295	0	0	1	1	0	1	1	1	0	0	0	0	0	0	0	0	0	0	0	1	0	0	1	0	1	0	0	0	0	8
rs72697297	0	0	1	1	0	1	1	1	0	0	0	0	0	0	0	0	0	0	0	1	0	0	1	0	1	0	0	0	0	8
rs72697299	0	0	1	0	0	0	0	0	0	0	0	0	0	0	0	0	0	0	0	0	0	0	0	0	0	0	0	0	0	1
rs7270745	0	0	0	0	0	0	0	0	0	0	0	0	1	0	0	0	0	0	0	0	0	0	0	0	0	0	1	0	0	2
rs72759874	0	0	1	0	1	0	1	0	0	0	0	0	0	0	0	0	0	0	1	0	0	0	0	0	1	0	0	0	0	5
rs729781	0	0	0	0	0	0	0	0	0	0	0	0	0	0	0	0	0	0	0	1	0	0	1	1	0	0	1	0	1	5
rs73035160	0	0	0	0	0	0	0	0	0	0	0	0	0	0	0	1	0	0	0	0	0	0	0	0	0	0	0	0	0	1
rs73047004	0	0	0	0	1	0	1	1	1	0	0	0	0	0	0	0	1	1	0	0	0	0	0	0	1	0	0	0	1	8
rs73047065	0	0	0	1	1	0	1	1	1	0	0	0	0	0	0	0	1	1	0	0	0	0	0	0	1	0	0	0	0	8
rs7306790	0	0	0	0	0	0	0	0	0	0	0	1	0	1	0	0	0	0	0	0	0	1	0	1	0	0	0	0	1	5
rs73077077	0	0	0	0	0	0	0	0	1	0	1	0	1	0	0	0	0	0	0	0	0	0	0	0	0	0	0	0	0	3
rs73117036	0	0	0	0	0	0	0	0	0	0	0	1	0	0	0	0	0	0	0	0	0	0	0	0	0	0	0	0	0	1
rs73118814	0	0	0	0	0	0	0	0	0	0	1	0	0	0	0	0	1	0	0	0	0	0	0	0	0	0	0	0	0	2
rs73129095	1	0	0	0	1	0	0	0	0	1	1	0	0	0	0	0	1	0	0	0	0	0	0	1	0	0	0	0	0	6
rs73245338	0	0	0	0	0	0	0	0	0	0	0	0	0	0	0	0	0	0	1	0	0	0	0	0	0	0	0	0	0	1
rs73373197	1	1	1	1	1	1	1	1	1	1	1	1	1	1	1	1	1	1	1	1	1	1	1	1	1	1	1	1	0	28
rs7350	0	1	0	0	0	0	0	0	0	0	0	0	1	1	1	0	0	0	0	0	0	0	0	0	0	1	0	0	0	5
rs73543356	0	0	0	0	0	0	0	0	0	0	0	0	0	0	0	0	0	0	0	0	0	0	0	0	0	0	0	0	1	1
rs73703112	0	0	0	0	1	0	1	0	0	0	0	0	0	0	0	1	0	0	0	0	0	0	1	0	0	0	1	1	0	6
rs737092	0	0	0	1	0	0	0	0	0	0	0	0	0	0	0	0	0	0	0	0	0	0	0	0	0	0	0	0	0	1
rs738526	0	0	0	0	0	0	1	0	0	0	0	0	0	0	0	0	0	0	0	0	0	0	0	0	0	0	0	0	1	2
rs7405696	0	0	0	0	0	0	0	0	0	0	0	1	0	0	0	0	0	0	1	0	0	0	0	0	0	0	0	0	0	2
rs741702	0	1	0	1	0	0	1	0	1	0	1	0	0	1	1	1	1	1	0	0	0	0	0	0	0	0	0	0	0	10
rs74528062	0	0	0	0	1	0	0	1	0	0	0	0	0	0	0	0	0	0	0	0	0	0	0	0	0	0	0	0	1	3
rs74576293	0	0	0	0	1	0	1	1	1	0	0	0	0	0	0	0	1	0	0	0	0	0	0	0	0	0	0	0	1	6
rs74821401	0	1	0	1	1	0	0	0	1	1	1	0	0	1	0	0	1	1	0	0	0	0	0	0	0	0	0	1	0	10
rs7511890	1	1	1	0	0	0	1	1	1	1	0	1	1	1	1	1	1	1	1	0	0	1	1	1	1	0	1	1	1	22
rs7512414	0	1	0	0	0	0	0	0	0	1	0	0	0	1	0	0	0	0	1	0	0	0	0	0	0	0	0	1	1	6
rs7515150	0	0	0	0	0	0	0	0	0	0	0	0	0	0	0	0	0	0	0	0	0	0	0	0	0	0	0	0	1	1
rs7525274	0	0	0	0	0	0	0	0	0	0	0	0	0	0	0	0	0	0	1	0	0	0	0	0	0	0	0	0	0	1
rs75267082	0	0	0	0	0	0	0	0	0	0	0	0	0	0	0	0	0	1	0	0	0	0	0	0	0	0	0	0	0	1
rs7528188	0	0	1	0	0	0	0	0	0	0	1	1	0	0	0	1	0	0	0	0	0	1	1	1	0	0	0	0	0	7
rs7528206	0	0	1	0	0	0	0	0	0	0	1	1	0	1	0	1	0	0	1	0	0	1	1	1	0	0	0	0	0	9
rs7528572	0	0	0	0	0	0	0	0	0	0	0	0	0	0	0	0	0	0	0	0	0	0	0	0	0	0	0	0	1	1
rs75318400	1	1	1	1	1	1	1	1	1	1	1	1	0	1	0	0	0	1	0	1	1	1	1	1	1	1	1	1	1	24
rs7543098	0	0	0	0	0	0	0	1	0	0	1	0	0	0	0	0	0	0	0	0	0	0	0	0	1	0	0	0	0	3
rs7543734	1	1	1	0	0	0	1	1	1	1	0	1	1	1	1	1	1	1	1	0	0	1	1	1	1	0	1	1	1	22
rs7543763	1	1	1	0	0	0	1	1	1	1	0	1	1	1	1	1	1	1	1	0	0	1	1	1	1	0	1	1	1	22
rs75585851	0	1	0	0	0	0	0	0	0	0	0	0	0	1	0	0	0	0	1	0	1	0	0	0	0	0	0	0	1	5
rs7565313	0	0	0	1	0	0	0	0	0	0	0	0	0	0	0	0	0	0	0	0	0	0	0	0	0	0	0	0	0	1
rs7565830	0	1	0	1	0	0	1	1	1	0	1	1	1	0	1	0	0	1	1	0	0	0	0	1	0	1	1	0	1	15
rs757105	0	0	0	0	1	0	1	0	0	0	0	0	0	0	0	0	0	0	1	0	0	0	0	0	0	0	0	0	0	3
rs757209	0	1	0	0	0	0	0	0	0	0	0	0	0	0	0	0	0	0	0	0	0	1	0	0	0	0	0	0	0	2
rs757655	1	0	0	0	0	0	0	0	0	0	0	0	0	0	0	0	1	0	0	0	0	0	0	0	0	0	0	0	0	2
rs75822029	0	0	0	0	0	0	0	0	0	0	0	0	1	0	0	0	0	0	0	0	0	0	0	0	0	0	0	0	0	1
rs7597735	0	0	0	0	0	0	0	0	0	0	0	0	0	0	0	0	0	0	0	0	0	0	0	1	0	0	0	0	0	1
rs7605824	1	1	0	0	0	0	0	0	0	0	0	0	1	1	0	0	0	0	0	0	0	1	1	1	0	0	0	0	1	8
rs76096449	0	0	0	0	0	0	0	0	0	0	0	0	0	0	0	1	0	0	0	0	0	0	0	0	0	1	0	0	0	2
rs7637635	0	0	0	0	0	1	1	0	0	0	0	0	0	0	1	0	0	1	0	0	0	0	0	0	0	0	0	0	0	4
rs76423990	0	0	0	0	0	0	0	0	0	0	0	0	0	0	0	0	0	0	1	0	0	0	0	0	0	0	0	0	0	1
rs7648018	0	0	0	0	0	1	1	0	1	0	0	0	0	0	1	0	0	1	0	0	0	0	0	0	0	0	0	0	0	5
rs76616650	0	0	0	0	0	1	1	0	0	0	0	0	0	0	0	0	0	1	1	0	0	0	1	0	0	0	0	0	0	5
rs7687209	0	0	0	0	0	0	0	0	0	0	0	0	0	0	0	0	0	0	1	0	0	0	0	0	0	0	0	0	0	1
rs7703560	0	0	0	0	0	0	0	0	0	0	0	0	0	0	0	0	0	0	0	0	0	0	0	0	1	0	0	0	0	1
rs77049555	0	0	0	0	0	0	0	0	0	0	0	0	0	0	0	0	0	0	0	0	0	0	0	0	0	0	0	0	1	1
rs7707989	0	0	0	0	0	0	0	0	0	0	0	0	0	0	0	0	0	0	0	0	0	0	0	0	0	0	0	0	1	1
rs77241311	0	0	0	0	0	0	0	0	0	0	0	0	0	0	0	1	0	0	0	0	0	0	0	0	0	0	0	0	0	1
rs7727632	0	0	0	0	1	0	0	1	0	0	0	0	0	0	0	0	0	0	0	0	0	0	0	0	0	0	0	0	0	2
rs7730247	0	0	1	0	0	0	0	0	0	0	0	0	0	0	0	0	0	0	0	0	0	0	0	0	0	0	0	0	0	1
rs77378748	0	0	0	0	1	0	0	0	0	0	0	0	0	0	0	1	0	0	0	0	0	0	0	0	0	0	0	0	0	2
rs77737253	0	0	0	0	1	0	1	0	1	0	0	0	0	0	0	0	1	1	0	0	0	0	0	0	1	0	0	0	1	7
rs77805826	0	0	0	0	0	0	0	0	0	0	0	0	0	0	0	0	0	0	0	0	0	0	0	1	0	0	0	0	0	1
rs77924615	0	0	0	0	0	0	0	0	0	0	0	0	0	0	0	0	0	0	0	0	0	0	0	0	0	0	0	0	1	1
rs7799991	0	0	0	0	0	0	0	0	0	0	0	1	0	0	0	0	0	0	0	0	0	0	0	0	0	0	0	0	0	1
rs7799998	0	0	0	0	0	0	0	0	0	0	0	1	0	0	0	0	0	0	0	0	0	0	0	0	0	0	0	0	0	1
rs78040893	0	0	0	0	0	0	0	0	0	0	0	0	0	0	0	0	0	0	1	0	0	0	0	0	0	0	0	0	0	1
rs78132593	1	0	0	0	1	0	0	0	0	0	0	0	0	0	0	0	1	0	0	0	0	0	0	1	0	0	0	0	0	4
rs78264410	0	1	1	1	1	0	0	0	0	0	0	0	0	0	0	0	0	0	0	0	0	0	1	1	1	0	1	0	0	8
rs78338058	0	0	0	0	0	0	0	1	0	0	0	0	0	0	0	0	0	0	0	0	0	0	0	0	0	0	0	0	1	2
rs7840156	1	1	1	1	1	1	1	1	1	1	1	1	1	1	1	1	1	1	1	1	1	1	1	1	1	1	1	1	1	29
rs7840728	0	0	0	0	0	0	0	0	0	0	0	1	0	1	0	1	1	0	0	0	0	0	0	0	0	0	0	0	0	4
rs78440108	0	0	1	1	0	1	0	1	0	0	0	0	0	0	0	0	0	0	0	0	0	0	1	0	0	0	0	0	0	5
rs784504	1	0	1	1	0	1	1	1	1	1	1	1	1	1	1	1	1	1	1	1	1	1	1	0	1	1	1	1	1	26
rs78477968	1	0	1	1	0	1	1	1	1	1	1	0	1	1	0	1	1	1	0	0	0	1	1	1	1	0	1	1	1	21
rs78503047	1	0	0	0	0	0	0	0	0	0	0	0	0	0	0	0	0	0	0	0	0	0	0	0	0	0	0	0	1	2
rs78907076	0	0	0	0	1	0	0	0	0	0	0	0	0	0	0	0	1	0	0	0	0	0	0	0	0	0	0	0	0	2
rs7911804	0	0	0	0	0	1	1	0	1	0	0	0	0	0	1	1	1	1	0	0	0	0	0	0	0	0	0	0	0	7
rs7916821	0	0	0	0	0	0	0	0	0	0	0	1	0	0	0	0	0	0	0	0	0	0	0	0	0	0	0	0	0	1
rs7932421	0	0	0	0	0	0	0	0	0	0	0	0	0	0	0	0	0	0	1	0	0	0	0	0	0	0	0	0	0	1
rs79346194	0	0	0	0	1	0	0	0	0	0	0	0	0	0	0	1	0	0	0	0	0	0	0	0	0	0	0	0	0	2
rs7936752	1	1	1	1	1	1	1	1	1	1	1	1	1	1	1	1	1	1	1	1	1	1	1	1	1	1	1	1	1	29
rs793838	0	0	0	0	0	0	0	0	0	1	0	0	0	0	0	0	0	0	0	0	0	0	0	0	0	0	0	0	0	1
rs7947450	1	1	1	1	1	1	1	1	1	1	1	1	1	1	1	1	1	1	1	1	1	1	1	1	1	1	1	1	1	29
rs79480807	0	0	0	0	0	0	0	0	0	0	0	0	0	0	0	0	0	0	1	0	0	0	0	0	0	0	0	0	0	1
rs7951890	1	0	0	1	0	0	0	0	0	0	0	0	0	0	0	0	0	0	0	0	0	0	1	0	1	0	0	0	0	4
rs7953798	0	0	0	0	1	0	0	0	0	0	0	0	0	0	0	0	0	0	0	0	0	0	0	0	0	0	0	0	0	1
rs79596128	0	0	0	0	0	0	0	0	0	1	0	1	0	0	0	0	0	0	0	0	0	0	0	0	0	0	1	0	0	3
rs7979731	0	0	0	0	1	0	1	1	1	0	0	0	0	0	0	0	0	1	0	0	0	0	0	0	1	0	0	0	1	7
rs80019595	0	0	0	0	0	0	0	0	0	0	0	0	0	0	0	0	0	0	1	0	0	0	0	0	0	0	0	0	0	1
rs80070424	0	0	0	0	0	0	0	0	0	0	1	0	0	0	0	0	0	1	0	0	0	0	0	0	0	0	0	0	0	2
rs80112473	0	0	0	0	0	0	0	0	0	0	0	0	0	0	0	0	0	0	1	0	0	0	0	0	0	0	0	0	0	1
rs8012815	0	0	0	0	1	0	0	0	0	0	0	0	0	0	0	0	0	0	0	0	0	0	0	0	0	0	0	0	0	1
rs8013117	1	0	0	1	0	1	0	0	0	0	0	0	0	0	1	0	0	0	0	1	0	0	0	0	1	0	0	0	0	6
rs8022573	0	0	0	0	1	0	0	0	0	0	0	0	0	0	0	0	0	0	0	0	0	0	0	0	0	0	0	0	0	1
rs80576	0	0	0	0	0	0	0	0	0	0	0	0	0	0	0	0	0	0	1	0	0	0	0	0	0	0	0	0	0	1
rs8071709	0	0	0	0	0	0	0	0	0	0	1	0	0	0	0	0	0	0	1	0	0	0	0	0	0	0	0	0	0	2
rs8073698	0	0	0	0	0	0	0	0	0	0	0	0	0	0	0	0	0	0	0	0	0	0	0	0	1	0	0	0	1	2
rs8074151	0	0	0	0	0	0	0	0	0	0	0	0	0	0	0	1	0	0	0	0	0	0	0	0	1	0	0	0	1	3
rs807624	0	0	0	0	0	0	0	0	0	0	0	0	0	0	0	0	0	0	0	0	0	0	0	0	0	0	0	0	1	1
rs8078036	0	0	0	0	0	0	0	0	0	0	0	0	0	0	0	1	0	0	0	0	0	0	0	0	1	0	0	0	0	2
rs8096658	0	0	0	0	0	0	1	1	1	1	0	0	1	0	0	1	0	1	0	0	0	0	0	0	0	0	0	0	0	7
rs8113367	0	0	1	0	0	1	1	0	0	1	1	0	1	1	1	0	0	1	0	1	0	0	0	1	0	0	1	0	0	12
rs81205	1	0	0	0	0	0	0	0	0	0	0	0	0	0	0	0	0	0	0	0	0	0	0	0	0	0	0	0	0	1
rs8126001	1	1	1	1	0	1	1	1	1	1	1	0	0	0	0	0	0	0	0	1	0	1	1	1	1	1	1	1	1	19
rs833805	0	0	1	0	0	0	1	1	1	0	0	0	0	0	0	0	0	1	0	0	0	0	0	0	0	0	0	0	0	5
rs838709	0	0	0	0	0	0	0	0	0	1	0	0	0	0	0	0	0	0	0	0	0	0	0	0	0	0	0	0	0	1
rs854922	1	1	1	1	1	1	1	1	1	1	1	1	1	1	1	1	0	1	1	1	1	1	1	1	1	1	1	1	1	28
rs854923	0	0	0	0	0	0	0	1	0	0	0	0	0	0	0	0	0	0	0	0	0	0	0	0	0	0	0	0	0	1
rs872587	0	0	0	1	0	0	0	0	0	0	0	0	0	0	1	0	0	0	0	1	0	0	1	1	0	0	0	0	0	5
rs877740	1	0	0	0	0	0	0	0	0	0	0	0	0	0	1	0	0	0	0	0	0	0	0	0	0	0	0	0	1	3
rs881858	1	0	0	0	0	0	0	1	1	0	0	0	0	0	0	0	1	0	1	0	0	1	0	0	0	0	0	0	0	6
rs886286	0	0	0	0	1	0	1	0	0	0	0	0	0	0	0	0	0	0	1	0	0	0	0	0	0	0	0	0	0	3
rs8866	0	0	0	1	1	1	0	1	0	1	1	0	1	0	1	1	1	1	1	1	0	1	1	1	1	1	1	1	0	20
rs892120	0	0	0	0	0	0	0	0	0	0	0	0	0	0	0	0	0	0	0	0	0	0	0	1	0	0	0	0	0	1
rs899170	0	1	1	0	0	1	0	0	0	0	0	0	0	0	0	0	0	0	0	0	0	0	1	0	0	0	0	0	0	4
rs908945	0	0	0	0	1	0	0	0	0	0	0	1	0	0	0	0	0	0	1	0	0	0	0	0	0	0	0	0	0	3
rs908946	0	0	0	0	0	0	0	0	0	0	0	1	0	1	0	0	0	0	1	0	0	1	1	0	0	0	0	0	0	5
rs919797	0	0	0	0	0	0	0	0	0	0	1	0	0	0	0	0	0	0	0	0	0	0	0	0	0	0	0	0	0	1
rs919798	0	0	0	0	0	0	0	0	0	0	1	0	0	0	0	0	0	0	0	0	0	0	0	0	0	0	0	0	0	1
rs9293565	0	0	0	0	1	0	0	0	0	0	0	0	0	0	0	0	1	0	0	0	0	0	0	0	0	0	0	0	0	2
rs930316	1	0	0	0	0	0	1	0	1	0	1	1	0	0	0	1	0	1	1	1	0	0	0	1	0	0	0	0	0	10
rs9311652	0	1	1	0	0	0	0	0	0	0	0	0	0	1	0	0	0	0	0	0	0	0	0	0	0	0	0	0	1	4
rs9313754	1	1	1	1	1	1	1	1	1	1	1	1	1	1	1	1	1	1	1	1	1	1	1	1	1	1	1	1	1	29
rs9333592	1	0	0	0	0	0	0	0	0	0	0	0	0	0	0	0	0	0	0	0	0	0	0	0	0	0	0	0	0	1
rs9385568	0	0	0	0	0	0	0	1	0	0	0	0	0	0	0	0	0	0	0	0	0	0	0	0	0	0	0	0	0	1
rs943347	0	0	0	0	0	0	0	0	0	0	0	0	0	0	1	0	0	0	0	0	0	0	0	0	1	0	0	0	0	2
rs9456506	0	0	0	0	0	0	0	0	0	0	0	0	0	0	0	0	0	0	0	1	0	0	0	0	0	0	0	0	0	1
rs9465741	0	0	0	0	0	0	0	0	0	0	0	1	0	0	0	0	0	0	0	0	0	0	0	0	0	0	0	0	1	2
rs9471632	0	1	1	0	1	1	1	1	0	1	0	0	0	1	0	1	0	0	0	1	0	1	1	1	1	0	0	0	1	15
rs9480867	0	0	0	1	0	1	0	1	0	0	0	0	1	0	1	0	0	1	0	0	0	1	1	1	1	1	1	0	0	12
rs950965	0	0	0	0	0	0	0	0	0	0	0	0	0	1	0	0	0	0	0	0	0	0	0	0	0	0	0	0	0	1
rs956006	0	0	0	0	0	0	0	0	0	0	0	0	0	0	0	0	1	0	0	0	0	0	0	0	0	0	0	0	0	1
rs966003	0	0	0	0	0	0	0	0	0	1	0	0	0	0	0	0	0	0	0	0	1	0	0	0	0	0	0	1	1	4
rs9682756	0	0	0	0	0	0	0	0	1	0	0	0	0	0	0	0	0	0	0	0	0	0	0	0	0	0	0	0	0	1
rs9728020	0	0	0	0	0	0	1	1	0	0	0	0	0	0	0	0	1	0	0	0	0	0	0	0	0	0	0	0	0	3
rs9862438	0	0	0	0	0	0	0	0	0	0	0	0	0	0	0	0	0	0	0	0	0	0	0	0	0	0	0	0	1	1
rs9894634	0	0	0	0	0	0	0	0	0	0	0	0	0	0	1	0	0	0	1	0	0	0	0	0	0	0	0	0	0	2
rs9895159	0	0	0	0	0	0	0	0	0	0	0	0	1	0	0	0	0	0	0	0	0	0	0	0	0	0	0	0	0	1
rs9895661	0	0	0	0	0	0	0	0	0	0	0	0	0	0	0	0	0	0	0	0	0	0	0	0	0	0	0	0	1	1
rs9901746	0	1	0	0	0	0	0	0	0	0	0	0	0	1	0	0	0	0	0	0	0	1	0	0	0	0	0	0	0	3
rs9905761	0	0	0	0	0	0	0	0	0	0	0	0	0	0	0	0	0	0	0	0	0	0	0	0	0	0	0	0	1	1
rs9922341	1	1	1	0	1	1	1	1	1	1	1	1	1	1	1	0	0	1	1	0	1	1	1	1	0	1	1	1	1	24
rs9925045	0	0	0	0	1	0	0	0	0	0	0	0	0	0	0	0	0	0	0	0	0	0	0	1	1	0	0	0	0	3
rs9952412	0	0	0	1	0	0	0	0	0	0	0	0	0	0	0	0	0	0	0	0	0	0	0	0	1	0	0	0	0	2
rs9972936	0	0	0	0	1	0	0	0	0	0	0	0	0	0	0	0	0	0	0	0	0	0	0	0	0	0	0	0	0	1

## Sheet: Supplementary Table_4
Supplementary Table 4: ATAC-seq sites in PTC
Defintion of accessible chromatin in PTC (SPM cut-off value 3.5).
seqnames	start	end	width	score_per_mio
chr1	778489	778990	502	16.1061
chr1	827273	827774	502	4.88475
chr1	869672	870173	502	5.50381
chr1	904442	904943	502	4.21749
chr1	906702	907203	502	15.4189
chr1	911100	911601	502	5.35893
chr1	912700	913201	502	10.1685
chr1	920932	921433	502	3.9073
chr1	938038	938539	502	10.9111
chr1	940659	941160	502	3.76157
chr1	966093	966594	502	21.501
chr1	966696	967197	502	14.8733
chr1	967928	968429	502	4.21749
chr1	975971	976472	502	17.3572
chr1	996914	997415	502	3.50251
chr1	999299	999800	502	3.50251
chr1	999918	1000419	502	12.3148
chr1	1001735	1002236	502	10.6559
chr1	1005126	1005627	502	5.31798
chr1	1013207	1013708	502	11.4251
chr1	1019531	1020032	502	7.12369
chr1	1021028	1021529	502	9.02785
chr1	1021721	1022222	502	8.44774
chr1	1024601	1025102	502	10.3406
chr1	1032908	1033409	502	8.97224
chr1	1040535	1041036	502	6.75603
chr1	1058240	1058741	502	5.31798
chr1	1059238	1059739	502	6.48483
chr1	1063949	1064450	502	26.7031
chr1	1067882	1068383	502	9.77243
chr1	1068492	1068993	502	4.01009
chr1	1069022	1069523	502	6.41076
chr1	1070161	1070662	502	9.77243
chr1	1073810	1074311	502	15.5644
chr1	1079396	1079897	502	32.6085
chr1	1079991	1080492	502	7.89565
chr1	1115966	1116467	502	22.3781
chr1	1122005	1122506	502	9.39863
chr1	1128357	1128858	502	8.73047
chr1	1130358	1130859	502	10.4308
chr1	1133280	1133781	502	7.81493
chr1	1144294	1144795	502	4.32209
chr1	1156100	1156601	502	4.85364
chr1	1157367	1157868	502	11.1675
chr1	1158063	1158564	502	5.74706
chr1	1162695	1163196	502	15.0093
chr1	1163416	1163917	502	5.15149
chr1	1164697	1165198	502	18.8185
chr1	1165849	1166350	502	6.30252
chr1	1207926	1208427	502	11.8959
chr1	1217814	1218315	502	4.16148
chr1	1231786	1232287	502	10.0379
chr1	1264767	1265268	502	9.13303
chr1	1272404	1272905	502	11.1675
chr1	1273858	1274359	502	4.52947
chr1	1282023	1282524	502	13.9278
chr1	1291743	1292244	502	9.88582
chr1	1305496	1305997	502	4.45991
chr1	1308057	1308558	502	8.53833
chr1	1309065	1309566	502	5.17909
chr1	1318166	1318667	502	6.09602
chr1	1324417	1324918	502	9.10738
chr1	1325355	1325856	502	5.82144
chr1	1344208	1344709	502	8.86519
chr1	1344734	1345235	502	28.2251
chr1	1345380	1345881	502	3.62668
chr1	1347727	1348228	502	8.78239
chr1	1360498	1360999	502	14.9513
chr1	1371954	1372455	502	6.17358
chr1	1375127	1375628	502	28.2404
chr1	1399243	1399744	502	21.7129
chr1	1407071	1407572	502	9.64801
chr1	1430371	1430872	502	4.53303
chr1	1433134	1433635	502	6.01883
chr1	1435436	1435937	502	4.64726
chr1	1437915	1438416	502	10.2895
chr1	1462332	1462833	502	15.3542
chr1	1471435	1471936	502	10.5541
chr1	1504984	1505485	502	7.97083
chr1	1510863	1511364	502	3.53417
chr1	1511736	1512237	502	14.9306
chr1	1574762	1575263	502	6.64044
chr1	1615135	1615636	502	15.6632
chr1	1658949	1659450	502	10.5624
chr1	1692281	1692782	502	7.74726
chr1	1692919	1693420	502	10.9652
chr1	1724277	1724778	502	17.3594
chr1	1746211	1746712	502	7.13677
chr1	1758776	1759277	502	32.7197
chr1	1777781	1778282	502	5.01759
chr1	1778716	1779217	502	12.0742
chr1	1782226	1782727	502	4.02458
chr1	1782791	1783292	502	7.93456
chr1	1826700	1827201	502	6.74097
chr1	1832795	1833296	502	4.13247
chr1	1833945	1834446	502	6.89064
chr1	1891398	1891899	502	6.35853
chr1	1906155	1906656	502	9.77763
chr1	1908889	1909390	502	7.77421
chr1	1919165	1919666	502	12.0289
chr1	1943932	1944433	502	3.65515
chr1	1959914	1960415	502	7.13326
chr1	1976603	1977104	502	5.2643
chr1	1988909	1989410	502	5.50917
chr1	2046401	2046902	502	8.53833
chr1	2049448	2049949	502	5.15149
chr1	2049997	2050498	502	13.909
chr1	2104626	2105127	502	3.63289
chr1	2132424	2132925	502	7.29892
chr1	2133122	2133623	502	10.6655
chr1	2135395	2135896	502	12.9842
chr1	2139949	2140450	502	8.49742
chr1	2189468	2189969	502	23.9289
chr1	2193617	2194118	502	6.13741
chr1	2194953	2195454	502	21.4098
chr1	2199233	2199734	502	20.3043
chr1	2204517	2205018	502	3.86772
chr1	2205204	2205705	502	5.1247
chr1	2208251	2208752	502	16.0419
chr1	2212466	2212967	502	12.7302
chr1	2227584	2228085	502	11.2962
chr1	2229201	2229702	502	4.63997
chr1	2231080	2231581	502	3.70484
chr1	2231689	2232190	502	7.62363
chr1	2246038	2246539	502	3.70484
chr1	2250490	2250991	502	3.59962
chr1	2255767	2256268	502	4.19394
chr1	2311378	2311879	502	4.01009
chr1	2322135	2322636	502	10.9111
chr1	2381676	2382177	502	9.5229
chr1	2391444	2391945	502	20.7464
chr1	2399834	2400335	502	5.38301
chr1	2412299	2412800	502	14.4972
chr1	2414196	2414697	502	4.18002
chr1	2451767	2452268	502	26.9964
chr1	2475035	2475536	502	5.12604
chr1	2480941	2481442	502	10.0379
chr1	2481915	2482416	502	7.74222
chr1	2526013	2526514	502	16.66
chr1	2526545	2527046	502	5.62019
chr1	2533303	2533804	502	7.89565
chr1	2534816	2535317	502	20.9271
chr1	2546141	2546642	502	9.89769
chr1	2546761	2547262	502	16.5256
chr1	2547983	2548484	502	9.77763
chr1	2548576	2549077	502	8.98673
chr1	2566070	2566571	502	5.12604
chr1	2578258	2578759	502	16.1295
chr1	2585362	2585863	502	4.42727
chr1	2586246	2586747	502	17.0906
chr1	2586999	2587500	502	5.28861
chr1	2642858	2643359	502	4.64726
chr1	3060884	3061385	502	6.75603
chr1	3066106	3066607	502	3.74186
chr1	3069738	3070239	502	4.88475
chr1	3172971	3173472	502	10.4427
chr1	3174761	3175262	502	5.14312
chr1	3213649	3214150	502	5.72848
chr1	3307350	3307851	502	6.18243
chr1	3313062	3313563	502	19.2223
chr1	3319827	3320328	502	6.18243
chr1	3352947	3353448	502	8.55232
chr1	3380419	3380920	502	4.59568
chr1	3453088	3453589	502	6.29627
chr1	3454135	3454636	502	6.06905
chr1	3459546	3460047	502	9.89769
chr1	3460587	3461088	502	6.25647
chr1	3482216	3482717	502	14.6019
chr1	3491258	3491759	502	4.42727
chr1	3530477	3530978	502	8.73047
chr1	3530997	3531498	502	8.97224
chr1	3624615	3625116	502	11.8864
chr1	3625457	3625958	502	5.17909
chr1	3649849	3650350	502	9.00517
chr1	3668759	3669260	502	7.17288
chr1	3671745	3672246	502	7.69568
chr1	3747197	3747698	502	10.0316
chr1	3772431	3772932	502	5.99246
chr1	3775508	3776009	502	7.13326
chr1	3796319	3796820	502	18.7618
chr1	3801355	3801856	502	4.96159
chr1	3811238	3811739	502	5.39864
chr1	3856338	3856839	502	3.81075
chr1	3857130	3857631	502	32.4206
chr1	3858078	3858579	502	4.90491
chr1	3869779	3870280	502	4.57028
chr1	3900319	3900820	502	24.6287
chr1	3901004	3901505	502	13.8253
chr1	3909866	3910367	502	4.41152
chr1	3910726	3911227	502	8.29572
chr1	3956490	3956991	502	3.70361
chr1	4267417	4267918	502	4.88907
chr1	4346097	4346598	502	5.203
chr1	4375746	4376247	502	4.19302
chr1	4395152	4395653	502	7.8713
chr1	4603211	4603712	502	42.5269
chr1	4644955	4645456	502	21.3449
chr1	4650414	4650915	502	37.7428
chr1	4652560	4653061	502	9.51874
chr1	4653169	4653670	502	3.60273
chr1	4656213	4656714	502	8.78239
chr1	4668727	4669228	502	12.5984
chr1	4673288	4673789	502	3.70843
chr1	4684141	4684642	502	5.85062
chr1	4690857	4691358	502	7.10534
chr1	4702876	4703377	502	3.52127
chr1	4745437	4745938	502	4.53303
chr1	4931441	4931942	502	9.5229
chr1	4963160	4963661	502	14.8584
chr1	5140071	5140572	502	5.99246
chr1	5424779	5425280	502	9.75926
chr1	5992267	5992768	502	30.6229
chr1	6026005	6026506	502	6.87205
chr1	6034350	6034851	502	4.97471
chr1	6157625	6158126	502	15.7445
chr1	6199395	6199896	502	19.8524
chr1	6205098	6205599	502	10.1492
chr1	6205942	6206443	502	14.9306
chr1	6220213	6220714	502	7.45835
chr1	6235803	6236304	502	6.61163
chr1	6244984	6245485	502	5.38301
chr1	6246656	6247157	502	3.70484
chr1	6259832	6260333	502	4.19302
chr1	6273296	6273797	502	14.6682
chr1	6343396	6343897	502	5.47378
chr1	6363032	6363533	502	6.41076
chr1	6385738	6386239	502	9.62858
chr1	6393402	6393903	502	19.6614
chr1	6414394	6414895	502	5.9382
chr1	6422768	6423269	502	3.9073
chr1	6423359	6423860	502	9.5229
chr1	6437045	6437546	502	9.13303
chr1	6438011	6438512	502	3.65515
chr1	6475462	6475963	502	4.85364
chr1	6486370	6486871	502	11.6255
chr1	6489032	6489533	502	13.2598
chr1	6490077	6490578	502	10.4019
chr1	6490643	6491144	502	7.45835
chr1	6491431	6491932	502	20.7711
chr1	6497349	6497850	502	4.0649
chr1	6519915	6520416	502	5.14693
chr1	6554314	6554815	502	9.37881
chr1	6579661	6580162	502	26.9745
chr1	6599226	6599727	502	16.5212
chr1	6601081	6601582	502	22.5249
chr1	6602152	6602653	502	4.02458
chr1	6602671	6603172	502	16.1371
chr1	6603324	6603825	502	6.76999
chr1	6603893	6604394	502	3.64461
chr1	6612743	6613244	502	7.81493
chr1	6613394	6613895	502	19.4081
chr1	6624780	6625281	502	9.38982
chr1	6625489	6625990	502	4.63934
chr1	6653856	6654357	502	10.4427
chr1	6701597	6702098	502	5.85847
chr1	6770676	6771177	502	4.78767
chr1	6784323	6784824	502	10.7834
chr1	6784918	6785419	502	38.3531
chr1	6867686	6868187	502	4.45991
chr1	6991224	6991725	502	5.01759
chr1	7026114	7026615	502	7.25522
chr1	7110239	7110740	502	15.9224
chr1	7117561	7118062	502	34.1374
chr1	7250091	7250592	502	6.75603
chr1	7265705	7266206	502	30.1239
chr1	7299286	7299787	502	8.12057
chr1	7300865	7301366	502	3.85393
chr1	7334601	7335102	502	4.24099
chr1	7401746	7402247	502	35.3427
chr1	7462589	7463090	502	5.60688
chr1	7469325	7469826	502	6.99496
chr1	7470878	7471379	502	21.7103
chr1	7471723	7472224	502	6.86743
chr1	7515177	7515678	502	3.63142
chr1	7526433	7526934	502	4.79279
chr1	7539621	7540122	502	7.34028
chr1	7549275	7549776	502	11.4905
chr1	7552375	7552876	502	19.2604
chr1	7621359	7621860	502	8.98673
chr1	7642757	7643258	502	5.51725
chr1	7667507	7668008	502	4.35015
chr1	7704409	7704910	502	10.9957
chr1	7745702	7746203	502	4.42288
chr1	7771165	7771666	502	5.61163
chr1	7783353	7783854	502	8.17496
chr1	7783864	7784365	502	16.8927
chr1	7948908	7949409	502	9.26124
chr1	7953988	7954489	502	11.8351
chr1	7961307	7961808	502	27.1322
chr1	7975189	7975690	502	8.47571
chr1	8004888	8005389	502	3.59962
chr1	8014926	8015427	502	4.30366
chr1	8018689	8019190	502	4.53818
chr1	8019950	8020451	502	5.60588
chr1	8026135	8026636	502	11.8864
chr1	8040533	8041034	502	10.3053
chr1	8061184	8061685	502	6.59431
chr1	8075677	8076178	502	4.74866
chr1	8077157	8077658	502	14.2729
chr1	8078143	8078644	502	11.554
chr1	8087136	8087637	502	7.3776
chr1	8090215	8090716	502	14.2025
chr1	8097348	8097849	502	25.1618
chr1	8121260	8121761	502	5.99246
chr1	8137692	8138193	502	3.65515
chr1	8155486	8155987	502	3.76157
chr1	8167132	8167633	502	4.09369
chr1	8169655	8170156	502	14.8096
chr1	8182246	8182747	502	4.77149
chr1	8197635	8198136	502	7.3555
chr1	8202116	8202617	502	8.87768
chr1	8211934	8212435	502	9.37881
chr1	8258995	8259496	502	3.83795
chr1	8314234	8314735	502	5.38301
chr1	8317862	8318363	502	3.53417
chr1	8343353	8343854	502	12.401
chr1	8373587	8374088	502	10.9592
chr1	8381899	8382400	502	13.6918
chr1	8396869	8397370	502	18.3033
chr1	8409043	8409544	502	4.53303
chr1	8419892	8420393	502	12.2048
chr1	8423864	8424365	502	5.00442
chr1	8424451	8424952	502	4.85364
chr1	8477066	8477567	502	6.48948
chr1	8480823	8481324	502	4.68124
chr1	8525761	8526262	502	16.4944
chr1	8560615	8561116	502	4.78204
chr1	8598036	8598537	502	7.63593
chr1	8603962	8604463	502	7.1364
chr1	8626401	8626902	502	8.02616
chr1	8660371	8660872	502	4.90555
chr1	8661674	8662175	502	7.63593
chr1	8670450	8670951	502	7.76558
chr1	8674922	8675423	502	3.86772
chr1	8698991	8699492	502	4.67041
chr1	8703240	8703741	502	11.0382
chr1	8712160	8712661	502	5.50381
chr1	8740093	8740594	502	15.1135
chr1	8745695	8746196	502	3.74231
chr1	8817475	8817976	502	10.0379
chr1	8822632	8823133	502	5.8695
chr1	8829405	8829906	502	5.31798
chr1	8848755	8849256	502	13.8121
chr1	8858014	8858515	502	6.52527
chr1	8859289	8859790	502	7.8713
chr1	8869012	8869513	502	5.13082
chr1	8871224	8871725	502	14.7375
chr1	8873564	8874065	502	22.9664
chr1	8877807	8878308	502	9.77763
chr1	8878580	8879081	502	18.7674
chr1	8879129	8879630	502	4.96159
chr1	8880089	8880590	502	12.4378
chr1	8890294	8890795	502	16.9259
chr1	8899834	8900335	502	18.4559
chr1	8903846	8904347	502	20.4476
chr1	8910948	8911449	502	3.84235
chr1	8939513	8940014	502	4.0793
chr1	8941777	8942278	502	7.3555
chr1	8986141	8986642	502	7.50041
chr1	9001686	9002187	502	6.23996
chr1	9044234	9044735	502	6.52527
chr1	9084821	9085322	502	5.48583
chr1	9100590	9101091	502	3.54944
chr1	9110619	9111120	502	12.9919
chr1	9114831	9115332	502	6.29627
chr1	9128723	9129224	502	6.10746
chr1	9129383	9129884	502	3.72378
chr1	9162750	9163251	502	11.0596
chr1	9163639	9164140	502	16.799
chr1	9182027	9182528	502	4.37738
chr1	9200354	9200855	502	5.93833
chr1	9201335	9201836	502	4.97471
chr1	9231514	9232015	502	6.05947
chr1	9234645	9235146	502	6.35853
chr1	9249955	9250456	502	3.91733
chr1	9269150	9269651	502	3.7558
chr1	9275459	9275960	502	11.0921
chr1	9280315	9280816	502	15.1527
chr1	9290079	9290580	502	7.2226
chr1	9292571	9293072	502	7.64321
chr1	9294370	9294871	502	11.7612
chr1	9300061	9300562	502	5.99246
chr1	9303009	9303510	502	27.1595
chr1	9315523	9316024	502	6.41055
chr1	9400493	9400994	502	5.70504
chr1	9413179	9413680	502	8.75055
chr1	9428767	9429268	502	13.9278
chr1	9436210	9436711	502	4.55377
chr1	9438623	9439124	502	16.66
chr1	9441298	9441799	502	9.13303
chr1	9472998	9473499	502	3.84235
chr1	9476729	9477230	502	13.8121
chr1	9490983	9491484	502	4.85364
chr1	9501007	9501508	502	16.0419
chr1	9521883	9522384	502	4.30366
chr1	9539068	9539569	502	14.0621
chr1	9539877	9540378	502	5.43349
chr1	9561438	9561939	502	4.63934
chr1	9588409	9588910	502	9.5151
chr1	9589774	9590275	502	4.53303
chr1	9593386	9593887	502	8.49742
chr1	9626908	9627409	502	9.51874
chr1	9671299	9671800	502	21.5612
chr1	9687330	9687831	502	10.3406
chr1	9689397	9689898	502	6.48483
chr1	9699273	9699774	502	4.02458
chr1	9700290	9700791	502	16.66
chr1	9719018	9719519	502	20.5969
chr1	9724874	9725375	502	5.01759
chr1	9766675	9767176	502	27.8167
chr1	9792309	9792810	502	4.11349
chr1	9796541	9797042	502	22.5551
chr1	9809068	9809569	502	20.2985
chr1	9824238	9824739	502	4.85364
chr1	9825459	9825960	502	24.9393
chr1	9835754	9836255	502	6.61649
chr1	9836363	9836864	502	11.5544
chr1	9865289	9865790	502	4.01009
chr1	9867391	9867892	502	4.78767
chr1	9874810	9875311	502	3.70361
chr1	9877989	9878490	502	12.5432
chr1	9881710	9882211	502	12.5432
chr1	9890366	9890867	502	21.8675
chr1	9892409	9892910	502	10.1492
chr1	9893129	9893630	502	12.401
chr1	9894095	9894596	502	8.02616
chr1	9910376	9910877	502	31.6243
chr1	9943116	9943617	502	18.3421
chr1	9950279	9950780	502	7.8713
chr1	10032536	10033037	502	19.9735
chr1	10033118	10033619	502	10.1492
chr1	10074300	10074801	502	14.4666
chr1	10108236	10108737	502	7.7067
chr1	10195580	10196081	502	6.53004
chr1	10210182	10210683	502	28.6846
chr1	10211304	10211805	502	11.3588
chr1	10288039	10288540	502	9.08491
chr1	10377344	10377845	502	3.54944
chr1	10398643	10399144	502	30.8365
chr1	10399349	10399850	502	4.96159
chr1	10425687	10426188	502	5.8695
chr1	10430352	10430853	502	10.6186
chr1	10459029	10459530	502	7.3776
chr1	10472301	10472802	502	14.3693
chr1	10474687	10475188	502	7.34028
chr1	10494717	10495218	502	6.13741
chr1	10495905	10496406	502	20.9199
chr1	10508591	10509092	502	9.6475
chr1	10510801	10511302	502	11.2253
chr1	10518986	10519487	502	3.86772
chr1	10528292	10528793	502	20.1496
chr1	10530710	10531211	502	6.99437
chr1	10599319	10599820	502	17.0702
chr1	10605967	10606468	502	7.61287
chr1	10665859	10666360	502	13.8367
chr1	10671553	10672054	502	5.50381
chr1	10675274	10675775	502	6.11595
chr1	10677043	10677544	502	4.13247
chr1	10679551	10680052	502	8.37142
chr1	10680480	10680981	502	6.11595
chr1	10686418	10686919	502	15.8306
chr1	10692295	10692796	502	6.75603
chr1	10704547	10705048	502	13.3929
chr1	10726400	10726901	502	10.9957
chr1	10730953	10731454	502	6.23996
chr1	10755859	10756360	502	3.65515
chr1	10779152	10779653	502	6.46911
chr1	10796319	10796820	502	4.7657
chr1	10804233	10804734	502	4.52543
chr1	10824845	10825346	502	3.81075
chr1	10891020	10891521	502	9.75703
chr1	10899871	10900372	502	3.52917
chr1	10900961	10901462	502	6.37601
chr1	10960931	10961432	502	7.99574
chr1	10975710	10976211	502	11.9438
chr1	10980095	10980596	502	5.13082
chr1	11012183	11012684	502	6.97281
chr1	11012739	11013240	502	9.37386
chr1	11059919	11060420	502	11.1675
chr1	11099465	11099966	502	10.2895
chr1	11134272	11134773	502	4.55377
chr1	11180241	11180742	502	8.98673
chr1	11246304	11246805	502	3.73728
chr1	11262431	11262932	502	35.002
chr1	11272624	11273125	502	4.74866
chr1	11273179	11273680	502	13.951
chr1	11642324	11642825	502	3.65515
chr1	11650356	11650857	502	5.84367
chr1	11653179	11653680	502	4.32209
chr1	11663931	11664432	502	6.25647
chr1	11664762	11665263	502	3.59962
chr1	11681012	11681513	502	10.4794
chr1	11693061	11693562	502	5.74706
chr1	11735897	11736398	502	9.15111
chr1	11736864	11737365	502	6.37601
chr1	11749099	11749600	502	3.65515
chr1	11784989	11785490	502	14.4666
chr1	11787470	11787971	502	8.12057
chr1	11790810	11791311	502	11.1675
chr1	11796378	11796879	502	16.208
chr1	11797582	11798083	502	11.2253
chr1	11803312	11803813	502	13.6734
chr1	11805093	11805594	502	4.41152
chr1	11805689	11806190	502	32.5628
chr1	11838587	11839088	502	4.24099
chr1	11893850	11894351	502	4.79279
chr1	11901340	11901841	502	7.69568
chr1	11908148	11908649	502	36.1969
chr1	11908666	11909167	502	14.6733
chr1	11909419	11909920	502	16.7818
chr1	11934388	11934889	502	15.7445
chr1	11967068	11967569	502	3.60273
chr1	11980024	11980525	502	25.1618
chr1	11990548	11991049	502	6.98849
chr1	12002116	12002617	502	6.53004
chr1	12019106	12019607	502	35.3792
chr1	12040561	12041062	502	4.90491
chr1	12051942	12052443	502	16.7898
chr1	12161755	12162256	502	9.73141
chr1	12208796	12209297	502	4.21749
chr1	12229749	12230250	502	6.23274
chr1	12230871	12231372	502	4.98721
chr1	12342440	12342941	502	4.78767
chr1	12386080	12386581	502	12.401
chr1	12434136	12434637	502	3.52127
chr1	12436907	12437408	502	4.42288
chr1	12454615	12455116	502	3.64461
chr1	12478085	12478586	502	22.6266
chr1	12480724	12481225	502	23.9288
chr1	12486420	12486921	502	5.50917
chr1	12549770	12550271	502	21.1075
chr1	12573793	12574294	502	4.57028
chr1	12595820	12596321	502	8.87768
chr1	12596407	12596908	502	7.44178
chr1	12601891	12602392	502	9.39863
chr1	12604269	12604770	502	12.9371
chr1	12616080	12616581	502	8.75055
chr1	12618928	12619429	502	6.59431
chr1	12619763	12620264	502	6.64979
chr1	12810696	12811197	502	5.90075
chr1	12851729	12852230	502	9.09126
chr1	13749121	13749622	502	11.8351
chr1	13754608	13755109	502	4.57028
chr1	13798779	13799280	502	8.29572
chr1	13812928	13813429	502	4.02458
chr1	13921733	13922234	502	4.55377
chr1	14017550	14018051	502	6.52527
chr1	14037035	14037536	502	3.52127
chr1	14055438	14055939	502	3.9073
chr1	14128057	14128558	502	9.4884
chr1	14138018	14138519	502	4.67041
chr1	14190491	14190992	502	5.62516
chr1	14215108	14215609	502	9.08491
chr1	14267947	14268448	502	18.915
chr1	14282732	14283233	502	6.36447
chr1	14302999	14303500	502	5.31798
chr1	14304489	14304990	502	11.0921
chr1	14486538	14487039	502	26.6706
chr1	14517231	14517732	502	5.10414
chr1	14543176	14543677	502	5.47378
chr1	14553645	14554146	502	25.9478
chr1	14560943	14561444	502	4.07366
chr1	14598295	14598796	502	5.00442
chr1	14605901	14606402	502	5.35893
chr1	14699557	14700058	502	6.73743
chr1	14704790	14705291	502	15.7445
chr1	14731775	14732276	502	20.4859
chr1	14732693	14733194	502	4.07366
chr1	14733320	14733821	502	4.01009
chr1	14738192	14738693	502	5.54953
chr1	14742227	14742728	502	24.4089
chr1	14756942	14757443	502	6.41055
chr1	14765737	14766238	502	13.1215
chr1	14768579	14769080	502	5.35893
chr1	14786032	14786533	502	6.61498
chr1	14787663	14788164	502	4.77149
chr1	14815073	14815574	502	5.54953
chr1	14850147	14850648	502	4.42727
chr1	14880876	14881377	502	6.09648
chr1	14894702	14895203	502	4.55377
chr1	14923855	14924356	502	4.52947
chr1	14929411	14929912	502	12.2591
chr1	14939929	14940430	502	7.31424
chr1	14945434	14945935	502	6.85882
chr1	14946865	14947366	502	7.24964
chr1	14950283	14950784	502	3.7558
chr1	14968449	14968950	502	22.3403
chr1	14970119	14970620	502	4.32209
chr1	14976148	14976649	502	32.4061
chr1	14977320	14977821	502	36.3661
chr1	14996245	14996746	502	21.8647
chr1	15001210	15001711	502	6.29627
chr1	15005091	15005592	502	3.64461
chr1	15019900	15020401	502	3.53417
chr1	15025390	15025891	502	3.60909
chr1	15027537	15028038	502	4.27176
chr1	15028056	15028557	502	28.7176
chr1	15030553	15031054	502	12.3019
chr1	15056828	15057329	502	5.60688
chr1	15090328	15090829	502	9.26124
chr1	15128450	15128951	502	5.58916
chr1	15139639	15140140	502	8.48835
chr1	15152295	15152796	502	12.2048
chr1	15153243	15153744	502	11.2962
chr1	15154541	15155042	502	4.41152
chr1	15168432	15168933	502	20.4859
chr1	15178874	15179375	502	18.9095
chr1	15188160	15188661	502	5.17909
chr1	15189584	15190085	502	6.99437
chr1	15196987	15197488	502	3.70484
chr1	15198636	15199137	502	5.95613
chr1	15200668	15201169	502	27.0063
chr1	15201827	15202328	502	19.5303
chr1	15206318	15206819	502	15.0032
chr1	15207710	15208211	502	5.95202
chr1	15212101	15212602	502	5.26278
chr1	15214408	15214909	502	3.53417
chr1	15247028	15247529	502	4.0649
chr1	15283454	15283955	502	5.01759
chr1	15323427	15323928	502	3.59962
chr1	15337599	15338100	502	6.11595
chr1	15352335	15352836	502	15.0054
chr1	15356122	15356623	502	4.47525
chr1	15409659	15410160	502	6.23274
chr1	15415935	15416436	502	8.75055
chr1	15417451	15417952	502	11.8137
chr1	15418779	15419280	502	13.5262
chr1	15523910	15524411	502	7.93456
chr1	15524544	15525045	502	5.54953
chr1	15525053	15525554	502	4.57028
chr1	15526536	15527037	502	26.5616
chr1	15530913	15531414	502	5.99246
chr1	15559415	15559916	502	7.50041
chr1	15603412	15603913	502	15.9224
chr1	15617142	15617643	502	11.8864
chr1	15617697	15618198	502	4.85364
chr1	15678517	15679018	502	18.3033
chr1	15680080	15680581	502	14.3315
chr1	15680600	15681101	502	11.8137
chr1	15703499	15704000	502	18.8651
chr1	15741294	15741795	502	9.50362
chr1	15749447	15749948	502	4.43776
chr1	15760504	15761005	502	7.12178
chr1	15764105	15764606	502	6.41076
chr1	15787980	15788481	502	3.70361
chr1	15795082	15795583	502	12.1629
chr1	15796682	15797183	502	16.4899
chr1	15799346	15799847	502	20.2051
chr1	15800062	15800563	502	28.6846
chr1	15800991	15801492	502	14.9306
chr1	15830652	15831153	502	8.78239
chr1	15834425	15834926	502	9.63374
chr1	15835005	15835506	502	5.28861
chr1	15835708	15836209	502	9.26124
chr1	15847396	15847897	502	14.9413
chr1	15849242	15849743	502	8.53833
chr1	15849752	15850253	502	3.7558
chr1	15886214	15886715	502	9.02785
chr1	15949427	15949928	502	24.0024
chr1	15952691	15953192	502	11.3558
chr1	15975845	15976346	502	7.3776
chr1	15994452	15994953	502	5.82144
chr1	16008947	16009448	502	3.80513
chr1	16015919	16016420	502	5.26278
chr1	16032755	16033256	502	3.59962
chr1	16055957	16056458	502	6.01883
chr1	16068318	16068819	502	7.34028
chr1	16075950	16076451	502	6.17358
chr1	16076771	16077272	502	14.0556
chr1	16078853	16079354	502	6.53004
chr1	16088975	16089476	502	17.3594
chr1	16122862	16123363	502	8.53833
chr1	16138769	16139270	502	14.5092
chr1	16139451	16139952	502	6.13741
chr1	16143687	16144188	502	14.3693
chr1	16145252	16145753	502	24.7839
chr1	16145762	16146263	502	6.05947
chr1	16146271	16146772	502	12.574
chr1	16146817	16147318	502	5.50381
chr1	16152690	16153191	502	6.37601
chr1	16154921	16155422	502	13.9818
chr1	16155903	16156404	502	12.031
chr1	16156775	16157276	502	7.62363
chr1	16158941	16159442	502	21.6467
chr1	16164161	16164662	502	16.9382
chr1	16167701	16168202	502	7.3776
chr1	16173382	16173883	502	23.9288
chr1	16175802	16176303	502	11.0921
chr1	16178538	16179039	502	6.27315
chr1	16181796	16182297	502	24.4089
chr1	16183068	16183569	502	3.70361
chr1	16187636	16188137	502	10.1395
chr1	16188939	16189440	502	4.30742
chr1	16189882	16190383	502	4.63651
chr1	16206544	16207045	502	22.5249
chr1	16216132	16216633	502	3.76157
chr1	16217306	16217807	502	9.89523
chr1	16226522	16227023	502	3.70361
chr1	16236155	16236656	502	10.0262
chr1	16236968	16237469	502	7.2226
chr1	16260737	16261238	502	6.36447
chr1	16352396	16352897	502	10.5624
chr1	16366865	16367366	502	18.6254
chr1	16367392	16367893	502	13.4074
chr1	16386315	16386816	502	9.11541
chr1	16396551	16397052	502	3.59962
chr1	16440387	16440888	502	11.6255
chr1	16441047	16441548	502	3.50251
chr1	16498975	16499476	502	10.064
chr1	16499727	16500228	502	4.36377
chr1	16513549	16514050	502	20.1
chr1	16514166	16514667	502	9.49083
chr1	16534854	16535355	502	11.4139
chr1	16612584	16613085	502	5.49731
chr1	16613356	16613857	502	36.4938
chr1	16620947	16621448	502	30.8365
chr1	16623974	16624475	502	11.6624
chr1	16624836	16625337	502	7.22566
chr1	16644484	16644985	502	12.2067
chr1	16677940	16678441	502	9.4884
chr1	16709559	16710060	502	4.01009
chr1	16717502	16718003	502	3.91733
chr1	16727170	16727671	502	4.32241
chr1	16764423	16764924	502	8.98673
chr1	16764949	16765450	502	18.9708
chr1	16766718	16767219	502	7.37796
chr1	16770307	16770808	502	22.6565
chr1	16772602	16773103	502	19.2223
chr1	16872575	16873076	502	13.3673
chr1	16889393	16889894	502	5.9827
chr1	16895415	16895916	502	9.05857
chr1	16896325	16896826	502	27.2603
chr1	16903781	16904282	502	3.81075
chr1	16904956	16905457	502	32.5628
chr1	16913767	16914268	502	16.4386
chr1	16921237	16921738	502	3.94809
chr1	16948330	16948831	502	20.8961
chr1	16951593	16952094	502	7.22748
chr1	16960748	16961249	502	5.48904
chr1	17003767	17004268	502	6.89064
chr1	17011770	17012271	502	12.1174
chr1	17053897	17054398	502	14.5092
chr1	17055084	17055585	502	6.87205
chr1	17059566	17060067	502	8.6238
chr1	17119241	17119742	502	8.12057
chr1	17125691	17126192	502	5.72076
chr1	17128316	17128817	502	22.6565
chr1	17140012	17140513	502	6.23996
chr1	17162854	17163355	502	20.6304
chr1	17167936	17168437	502	36.2013
chr1	17189861	17190362	502	16.799
chr1	17191335	17191836	502	4.14269
chr1	17192331	17192832	502	5.17909
chr1	17198675	17199176	502	5.62516
chr1	17200721	17201222	502	10.0316
chr1	17204522	17205023	502	3.63142
chr1	17207998	17208499	502	12.3675
chr1	17214908	17215409	502	3.52127
chr1	17226471	17226972	502	9.6475
chr1	17229357	17229858	502	5.72076
chr1	17233046	17233547	502	8.90806
chr1	17233614	17234115	502	35.8841
chr1	17237008	17237509	502	18.525
chr1	17239359	17239860	502	3.86772
chr1	17250521	17251022	502	6.97281
chr1	17251687	17252188	502	8.02616
chr1	17287359	17287860	502	4.65452
chr1	17297942	17298443	502	4.24099
chr1	17348269	17348770	502	3.76157
chr1	17369374	17369875	502	11.4927
chr1	17406089	17406590	502	5.73169
chr1	17474244	17474745	502	3.63142
chr1	17475674	17476175	502	7.872
chr1	17494162	17494663	502	5.93833
chr1	17502275	17502776	502	6.53004
chr1	17516846	17517347	502	4.01009
chr1	17519995	17520496	502	18.3421
chr1	17523552	17524053	502	4.29584
chr1	17526183	17526684	502	7.97083
chr1	17540581	17541082	502	3.91733
chr1	17545279	17545780	502	10.1683
chr1	17550908	17551409	502	14.6733
chr1	17551670	17552171	502	13.5472
chr1	17553961	17554462	502	15.3003
chr1	17559700	17560201	502	19.2223
chr1	17561146	17561647	502	10.2754
chr1	17564621	17565122	502	3.70484
chr1	17565451	17565952	502	5.62516
chr1	17569589	17570090	502	12.8286
chr1	17580124	17580625	502	15.0716
chr1	17586156	17586657	502	9.64801
chr1	17588361	17588862	502	4.09369
chr1	17591928	17592429	502	3.59962
chr1	17611925	17612426	502	5.02404
chr1	17624764	17625265	502	6.52527
chr1	17633540	17634041	502	9.15111
chr1	17671713	17672214	502	5.35893
chr1	17681590	17682091	502	3.96626
chr1	17682332	17682833	502	8.98673
chr1	17765469	17765970	502	6.76999
chr1	17768554	17769055	502	14.8584
chr1	17866408	17866909	502	7.8713
chr1	17874205	17874706	502	11.8028
chr1	17875853	17876354	502	5.35893
chr1	17878830	17879331	502	9.77763
chr1	18149177	18149678	502	15.4959
chr1	18182698	18183199	502	3.52917
chr1	18339097	18339598	502	5.01759
chr1	18341290	18341791	502	12.9945
chr1	18396205	18396706	502	6.25647
chr1	18480666	18481167	502	30.0367
chr1	18481197	18481698	502	8.39531
chr1	18875161	18875662	502	4.47525
chr1	18882399	18882900	502	4.35015
chr1	18902641	18903142	502	20.8961
chr1	18913049	18913550	502	10.0233
chr1	18926538	18927039	502	23.7055
chr1	18927064	18927565	502	5.95613
chr1	18931658	18932159	502	4.78767
chr1	18932370	18932871	502	9.51874
chr1	18937128	18937629	502	6.06838
chr1	18938308	18938809	502	17.3594
chr1	18948421	18948922	502	5.01759
chr1	18955499	18956000	502	3.61155
chr1	18956540	18957041	502	14.9413
chr1	19009815	19010316	502	32.1236
chr1	19010981	19011482	502	20.41
chr1	19014060	19014561	502	5.08858
chr1	19034012	19034513	502	5.60588
chr1	19048837	19049338	502	3.50251
chr1	19067246	19067747	502	9.00517
chr1	19074785	19075286	502	21.9388
chr1	19079969	19080470	502	7.8713
chr1	19080672	19081173	502	6.13741
chr1	19099965	19100466	502	8.05457
chr1	19110187	19110688	502	7.72078
chr1	19113584	19114085	502	5.39864
chr1	19210140	19210641	502	18.8185
chr1	19251421	19251922	502	13.535
chr1	19252140	19252641	502	7.10534
chr1	19288717	19289218	502	7.64321
chr1	19311164	19311665	502	5.43349
chr1	19311925	19312426	502	12.8904
chr1	19312432	19312933	502	13.951
chr1	19315233	19315734	502	6.23996
chr1	19336520	19337021	502	6.41055
chr1	19395654	19396155	502	4.16148
chr1	19430011	19430512	502	7.8713
chr1	19440388	19440889	502	15.9224
chr1	19445815	19446316	502	4.8614
chr1	19448480	19448981	502	16.9599
chr1	19448991	19449492	502	4.8614
chr1	19450783	19451284	502	3.52127
chr1	19452266	19452767	502	6.74097
chr1	19454479	19454980	502	4.13247
chr1	19468293	19468794	502	7.34028
chr1	19469347	19469848	502	9.26124
chr1	19485339	19485840	502	8.97224
chr1	19596590	19597091	502	12.9919
chr1	19616387	19616888	502	4.68124
chr1	19622133	19622634	502	6.76999
chr1	19643090	19643591	502	9.02785
chr1	19643938	19644439	502	3.50008
chr1	19651064	19651565	502	4.63651
chr1	19653641	19654142	502	5.47378
chr1	19659664	19660165	502	9.6475
chr1	19704470	19704971	502	4.13247
chr1	19715516	19716017	502	12.4419
chr1	19734581	19735082	502	4.30366
chr1	19735751	19736252	502	4.68124
chr1	19737323	19737824	502	9.89523
chr1	19750476	19750977	502	3.81075
chr1	19758264	19758765	502	17.0906
chr1	19759655	19760156	502	5.74706
chr1	19764721	19765222	502	14.9306
chr1	19765552	19766053	502	12.5432
chr1	19800141	19800642	502	7.72078
chr1	19800946	19801447	502	9.08491
chr1	19882107	19882608	502	14.5271
chr1	19903519	19904020	502	4.96159
chr1	19925191	19925692	502	10.0149
chr1	19926537	19927038	502	3.85393
chr1	19948961	19949462	502	6.37601
chr1	20058448	20058949	502	5.13082
chr1	20105813	20106314	502	4.05446
chr1	20109446	20109947	502	9.11824
chr1	20112208	20112709	502	5.2454
chr1	20114176	20114677	502	9.62858
chr1	20124426	20124927	502	4.13247
chr1	20152200	20152701	502	7.3776
chr1	20171426	20171927	502	8.49742
chr1	20185990	20186491	502	3.63289
chr1	20211424	20211925	502	10.8569
chr1	20212891	20213392	502	12.031
chr1	20234697	20235198	502	4.65452
chr1	20279446	20279947	502	14.5203
chr1	20411143	20411644	502	8.55232
chr1	20426853	20427354	502	10.2763
chr1	20476315	20476816	502	4.18679
chr1	20480308	20480809	502	15.6378
chr1	20481222	20481723	502	11.6839
chr1	20486281	20486782	502	3.86866
chr1	20493783	20494284	502	7.34028
chr1	20494293	20494794	502	5.43349
chr1	20494913	20495414	502	10.1395
chr1	20496114	20496615	502	24.5693
chr1	20507827	20508328	502	10.2995
chr1	20511849	20512350	502	3.63289
chr1	20575195	20575696	502	5.31798
chr1	20577988	20578489	502	3.7558
chr1	20588803	20589304	502	5.93833
chr1	20604106	20604607	502	13.3969
chr1	20612376	20612877	502	4.90555
chr1	20613804	20614305	502	28.1419
chr1	20633619	20634120	502	4.41232
chr1	20634426	20634927	502	4.57028
chr1	20661265	20661766	502	31.2902
chr1	20696585	20697086	502	15.6931
chr1	20717859	20718360	502	3.91733
chr1	20724988	20725489	502	8.87768
chr1	20732053	20732554	502	9.7888
chr1	20732980	20733481	502	25.3463
chr1	20786518	20787019	502	12.746
chr1	20787596	20788097	502	4.32209
chr1	20871356	20871857	502	5.62516
chr1	20896728	20897229	502	4.18679
chr1	21022223	21022724	502	19.91
chr1	21024695	21025196	502	4.18563
chr1	21077075	21077576	502	4.32209
chr1	21091008	21091509	502	10.4019
chr1	21149741	21150242	502	8.6238
chr1	21176681	21177182	502	15.3542
chr1	21195076	21195577	502	6.13741
chr1	21206050	21206551	502	9.4884
chr1	21222213	21222714	502	3.52917
chr1	21238391	21238892	502	27.1595
chr1	21239039	21239540	502	7.1364
chr1	21252085	21252586	502	20.4859
chr1	21255157	21255658	502	4.01009
chr1	21261724	21262225	502	11.0392
chr1	21289871	21290372	502	3.83676
chr1	21294360	21294861	502	8.78239
chr1	21297899	21298400	502	7.57682
chr1	21298858	21299359	502	6.87205
chr1	21309183	21309684	502	16.0419
chr1	21324490	21324991	502	38.1282
chr1	21329308	21329809	502	16.799
chr1	21334173	21334674	502	18.4837
chr1	21335759	21336260	502	9.62365
chr1	21345312	21345813	502	10.3406
chr1	21368363	21368864	502	6.76999
chr1	21379080	21379581	502	8.06422
chr1	21439821	21440322	502	8.90806
chr1	21568265	21568766	502	10.1395
chr1	21574010	21574511	502	4.13247
chr1	21586790	21587291	502	22.5551
chr1	21607710	21608211	502	3.63267
chr1	21623554	21624055	502	6.73743
chr1	21626794	21627295	502	13.3673
chr1	21635109	21635610	502	3.54944
chr1	21638633	21639134	502	17.6951
chr1	21642161	21642662	502	5.1247
chr1	21764632	21765133	502	8.2458
chr1	21782802	21783303	502	7.86785
chr1	21783323	21783824	502	16.3813
chr1	21816844	21817345	502	14.1052
chr1	21869727	21870228	502	23.7755
chr1	21904768	21905269	502	15.6931
chr1	21921399	21921900	502	20.6153
chr1	21922458	21922959	502	5.08858
chr1	21931065	21931566	502	15.8306
chr1	21933708	21934209	502	8.9757
chr1	21935804	21936305	502	10.7834
chr1	21937297	21937798	502	5.9827
chr1	21939580	21940081	502	11.8028
chr1	21956853	21957354	502	24.7839
chr1	21963892	21964393	502	4.74866
chr1	21966168	21966669	502	7.50041
chr1	21972858	21973359	502	4.70121
chr1	22018978	22019479	502	10.2895
chr1	22025069	22025570	502	9.26124
chr1	22025605	22026106	502	12.9945
chr1	22052399	22052900	502	12.031
chr1	22053268	22053769	502	4.24099
chr1	22070140	22070641	502	4.08487
chr1	22132405	22132906	502	3.91733
chr1	22142176	22142677	502	4.01009
chr1	22229442	22229943	502	6.29627
chr1	22420390	22420891	502	4.79279
chr1	22447514	22448015	502	5.24461
chr1	22451698	22452199	502	10.4308
chr1	22469383	22469884	502	3.94809
chr1	22689427	22689928	502	19.4081
chr1	22704426	22704927	502	6.61649
chr1	22738462	22738963	502	4.78204
chr1	22739617	22740118	502	11.4905
chr1	22746090	22746591	502	12.574
chr1	22747289	22747790	502	16.9401
chr1	22750282	22750783	502	25.374
chr1	22789284	22789785	502	17.6951
chr1	22826711	22827212	502	5.31798
chr1	22831981	22832482	502	24.0824
chr1	22861817	22862318	502	4.74866
chr1	22872981	22873482	502	17.4973
chr1	22903009	22903510	502	5.24461
chr1	22976348	22976849	502	5.35893
chr1	23010625	23011126	502	8.36348
chr1	23013694	23014195	502	4.96159
chr1	23019116	23019617	502	13.6598
chr1	23100151	23100652	502	9.50362
chr1	23149044	23149545	502	3.65515
chr1	23168620	23169121	502	4.18002
chr1	23177508	23178009	502	8.16981
chr1	23188808	23189309	502	7.0473
chr1	23196832	23197333	502	12.5432
chr1	23248411	23248912	502	13.5472
chr1	23344243	23344744	502	29.6075
chr1	23368135	23368636	502	26.4054
chr1	23368679	23369180	502	15.5962
chr1	23369348	23369849	502	4.11349
chr1	23377334	23377835	502	5.85062
chr1	23393546	23394047	502	5.35893
chr1	23402883	23403384	502	9.21903
chr1	23403694	23404195	502	24.2361
chr1	23451891	23452392	502	5.72076
chr1	23472913	23473414	502	12.6858
chr1	23477305	23477806	502	4.37738
chr1	23484353	23484854	502	6.89064
chr1	23528139	23528640	502	8.68488
chr1	23531237	23531738	502	4.74866
chr1	23539728	23540229	502	9.51874
chr1	23554714	23555215	502	11.8864
chr1	23555850	23556351	502	7.25728
chr1	23559267	23559768	502	18.4837
chr1	23562253	23562754	502	8.81783
chr1	23593482	23593983	502	8.81783
chr1	23594794	23595295	502	10.5288
chr1	23619594	23620095	502	5.03922
chr1	23691508	23692009	502	11.5544
chr1	23728450	23728951	502	3.80513
chr1	23743150	23743651	502	5.48904
chr1	23744558	23745059	502	3.7558
chr1	23756623	23757124	502	9.2747
chr1	23772061	23772562	502	3.63142
chr1	23777989	23778490	502	10.4216
chr1	23790037	23790538	502	6.36447
chr1	23790868	23791369	502	8.66018
chr1	23791613	23792114	502	4.21749
chr1	23793323	23793824	502	4.11349
chr1	23799395	23799896	502	20.775
chr1	23800592	23801093	502	12.602
chr1	23809650	23810151	502	4.11349
chr1	23825177	23825678	502	5.35893
chr1	23865463	23865964	502	11.0392
chr1	23868115	23868616	502	9.10738
chr1	23904600	23905101	502	4.78767
chr1	23916755	23917256	502	7.01173
chr1	23931025	23931526	502	11.9438
chr1	23951558	23952059	502	21.3964
chr1	23955098	23955599	502	4.78767
chr1	23958948	23959449	502	8.78239
chr1	23959467	23959968	502	23.8539
chr1	23980167	23980668	502	13.9651
chr1	23980673	23981174	502	4.82264
chr1	23984496	23984997	502	5.66609
chr1	24009354	24009855	502	10.3053
chr1	24018756	24019257	502	12.3019
chr1	24022635	24023136	502	13.5472
chr1	24070780	24071281	502	3.91733
chr1	24108784	24109285	502	10.4308
chr1	24112418	24112919	502	9.9076
chr1	24117705	24118206	502	4.16148
chr1	24120189	24120690	502	4.63651
chr1	24150389	24150890	502	6.87205
chr1	24187087	24187588	502	9.24291
chr1	24191856	24192357	502	5.37764
chr1	24201885	24202386	502	10.6944
chr1	24236610	24237111	502	7.3488
chr1	24257357	24257858	502	4.20771
chr1	24266343	24266844	502	28.9917
chr1	24283276	24283777	502	6.67329
chr1	24283998	24284499	502	4.41152
chr1	24289908	24290409	502	20.0537
chr1	24293896	24294397	502	3.52917
chr1	24294691	24295192	502	13.8927
chr1	24309709	24310210	502	13.5472
chr1	24317015	24317516	502	9.39863
chr1	24319191	24319692	502	13.4805
chr1	24321878	24322379	502	13.3252
chr1	24323134	24323635	502	4.53303
chr1	24362929	24363430	502	5.47378
chr1	24365181	24365682	502	12.2585
chr1	24384132	24384633	502	3.64461
chr1	24393879	24394380	502	5.04164
chr1	24409446	24409947	502	5.93833
chr1	24413403	24413904	502	8.17496
chr1	24415413	24415914	502	20.0554
chr1	24416914	24417415	502	39.1255
chr1	24417667	24418168	502	7.63593
chr1	24459523	24460024	502	20.1976
chr1	24488071	24488572	502	6.64044
chr1	24502594	24503095	502	8.97224
chr1	24515514	24516015	502	10.1685
chr1	24536433	24536934	502	13.1152
chr1	24540957	24541458	502	4.79279
chr1	24544109	24544610	502	8.02616
chr1	24558978	24559479	502	8.15708
chr1	24562600	24563101	502	5.02404
chr1	24567890	24568391	502	6.53853
chr1	24642040	24642541	502	4.96159
chr1	24642773	24643274	502	19.1615
chr1	24657722	24658223	502	3.86772
chr1	24683552	24684053	502	19.9941
chr1	24688451	24688952	502	5.02404
chr1	24702406	24702907	502	6.53853
chr1	24705230	24705731	502	4.32209
chr1	24713173	24713674	502	7.63593
chr1	24744936	24745437	502	27.767
chr1	24748364	24748865	502	5.95613
chr1	24770133	24770634	502	4.63651
chr1	24786103	24786604	502	4.43776
chr1	24847961	24848462	502	11.1675
chr1	24909433	24909934	502	4.63651
chr1	24914733	24915234	502	4.57028
chr1	25232207	25232708	502	11.4905
chr1	25233013	25233514	502	4.96159
chr1	25237130	25237631	502	3.65515
chr1	25239776	25240277	502	17.9404
chr1	25247413	25247914	502	12.2048
chr1	25338170	25338671	502	12.0742
chr1	25425368	25425869	502	10.4216
chr1	25430488	25430989	502	18.4837
chr1	25503702	25504203	502	5.47378
chr1	25543363	25543864	502	7.38255
chr1	25549558	25550059	502	12.9919
chr1	25616210	25616711	502	5.8695
chr1	25737063	25737564	502	21.0649
chr1	25771691	25772192	502	10.1492
chr1	25773405	25773906	502	16.0419
chr1	25796732	25797233	502	3.97643
chr1	25819727	25820228	502	13.9278
chr1	25820602	25821103	502	6.98849
chr1	25821592	25822093	502	3.70484
chr1	25844736	25845237	502	4.02458
chr1	25859218	25859719	502	8.5692
chr1	25867330	25867831	502	10.9592
chr1	25875056	25875557	502	6.17358
chr1	25875601	25876102	502	8.87768
chr1	25890455	25890956	502	18.7674
chr1	25892402	25892903	502	15.8931
chr1	25895310	25895811	502	7.22566
chr1	25905141	25905642	502	8.43566
chr1	25906246	25906747	502	12.3148
chr1	25922667	25923168	502	4.0649
chr1	25997905	25998406	502	25.0516
chr1	26035249	26035750	502	11.9761
chr1	26035949	26036450	502	13.3929
chr1	26049678	26050179	502	4.24099
chr1	26064515	26065016	502	17.0475
chr1	26110916	26111417	502	8.03752
chr1	26111439	26111940	502	4.77149
chr1	26112009	26112510	502	14.2456
chr1	26169653	26170154	502	11.4566
chr1	26177159	26177660	502	8.84432
chr1	26181532	26182033	502	8.87768
chr1	26218879	26219380	502	4.32241
chr1	26225126	26225627	502	4.67041
chr1	26233840	26234341	502	22.9327
chr1	26276159	26276660	502	11.2742
chr1	26278835	26279336	502	5.39864
chr1	26279637	26280138	502	10.8266
chr1	26284666	26285167	502	7.06696
chr1	26289187	26289688	502	4.59568
chr1	26306427	26306928	502	18.128
chr1	26321443	26321944	502	5.93833
chr1	26336351	26336852	502	9.10738
chr1	26349176	26349677	502	7.69568
chr1	26351500	26352001	502	6.22019
chr1	26353950	26354451	502	8.239
chr1	26356999	26357500	502	4.59568
chr1	26416965	26417466	502	4.45991
chr1	26431973	26432474	502	15.9224
chr1	26471960	26472461	502	8.12057
chr1	26472777	26473278	502	6.73893
chr1	26500365	26500866	502	10.8201
chr1	26500939	26501440	502	6.17358
chr1	26510632	26511133	502	6.29627
chr1	26529663	26530164	502	5.61163
chr1	26531095	26531596	502	18.525
chr1	26620722	26621223	502	6.86743
chr1	26621225	26621726	502	10.8266
chr1	26637773	26638274	502	4.90491
chr1	26677400	26677901	502	19.7041
chr1	26687765	26688266	502	5.70504
chr1	26692356	26692857	502	6.45661
chr1	26692857	26693358	502	10.6869
chr1	26695376	26695877	502	11.7612
chr1	26698000	26698501	502	8.2458
chr1	26723422	26723923	502	15.6378
chr1	26744011	26744512	502	10.2895
chr1	26771541	26772042	502	12.0742
chr1	26772641	26773142	502	5.14312
chr1	26787785	26788286	502	8.30253
chr1	26788941	26789442	502	3.9073
chr1	26799835	26800336	502	9.6475
chr1	26849201	26849702	502	29.8771
chr1	26853061	26853562	502	20.9199
chr1	26858902	26859403	502	8.11489
chr1	26861839	26862340	502	10.5347
chr1	26862761	26863262	502	12.0742
chr1	26864132	26864633	502	4.45991
chr1	26865074	26865575	502	32.6085
chr1	26865601	26866102	502	4.70314
chr1	26872329	26872830	502	3.7558
chr1	26889908	26890409	502	8.99153
chr1	26900056	26900557	502	13.3969
chr1	26907518	26908019	502	23.3949
chr1	26921406	26921907	502	20.6554
chr1	26929994	26930495	502	3.81075
chr1	26940311	26940812	502	3.70484
chr1	26960259	26960760	502	6.18243
chr1	26961727	26962228	502	6.23996
chr1	26966830	26967331	502	4.90555
chr1	26990487	26990988	502	18.3033
chr1	26991233	26991734	502	6.64044
chr1	26993439	26993940	502	9.77243
chr1	26995010	26995511	502	4.57028
chr1	26995971	26996472	502	3.97828
chr1	26997595	26998096	502	9.6475
chr1	26998824	26999325	502	7.31424
chr1	26999358	26999859	502	18.7618
chr1	27001600	27002101	502	7.10294
chr1	27005714	27006215	502	3.52127
chr1	27008089	27008590	502	5.4915
chr1	27009604	27010105	502	4.18563
chr1	27010928	27011429	502	11.0382
chr1	27012736	27013237	502	19.5303
chr1	27031407	27031908	502	17.6883
chr1	27044491	27044992	502	4.02458
chr1	27097333	27097834	502	6.29193
chr1	27102630	27103131	502	4.02458
chr1	27112019	27112520	502	37.6888
chr1	27117673	27118174	502	4.70572
chr1	27122568	27123069	502	12.1663
chr1	27137536	27138037	502	7.2226
chr1	27142413	27142914	502	12.467
chr1	27145874	27146375	502	9.88582
chr1	27155020	27155521	502	9.7642
chr1	27234280	27234781	502	18.1141
chr1	27300728	27301229	502	4.68124
chr1	27321965	27322466	502	21.1075
chr1	27340400	27340901	502	3.80513
chr1	27341751	27342252	502	9.77243
chr1	27342786	27343287	502	6.29193
chr1	27349430	27349931	502	11.3558
chr1	27365525	27366026	502	11.0873
chr1	27366735	27367236	502	11.8137
chr1	27372116	27372617	502	6.64044
chr1	27392339	27392840	502	8.8375
chr1	27402303	27402804	502	4.21749
chr1	27418302	27418803	502	8.90495
chr1	27428509	27429010	502	7.13326
chr1	27436477	27436978	502	5.31798
chr1	27455205	27455706	502	7.62363
chr1	27483206	27483707	502	3.70361
chr1	27490230	27490731	502	16.8385
chr1	27518255	27518756	502	5.15149
chr1	27519476	27519977	502	5.35893
chr1	27528170	27528671	502	7.29892
chr1	27528746	27529247	502	4.68124
chr1	27536720	27537221	502	5.35893
chr1	27537531	27538032	502	5.70504
chr1	27538709	27539210	502	6.23996
chr1	27540264	27540765	502	13.2686
chr1	27542304	27542805	502	33.8136
chr1	27556668	27557169	502	4.25291
chr1	27557248	27557749	502	14.2296
chr1	27557788	27558289	502	6.41076
chr1	27563719	27564220	502	5.81744
chr1	27568308	27568809	502	18.4559
chr1	27572600	27573101	502	4.8614
chr1	27575048	27575549	502	8.12057
chr1	27575805	27576306	502	5.39864
chr1	27594504	27595005	502	3.81075
chr1	27595089	27595590	502	5.50381
chr1	27599145	27599646	502	5.08858
chr1	27601883	27602384	502	5.03922
chr1	27603868	27604369	502	6.64044
chr1	27658793	27659294	502	3.74186
chr1	27659880	27660381	502	6.23996
chr1	27663038	27663539	502	4.67041
chr1	27672068	27672569	502	17.7781
chr1	27725551	27726052	502	23.6224
chr1	27772895	27773396	502	23.701
chr1	27785744	27786245	502	4.79279
chr1	27830503	27831004	502	15.8306
chr1	27858012	27858513	502	10.6944
chr1	27863099	27863600	502	37.3241
chr1	27872403	27872904	502	8.66018
chr1	27873012	27873513	502	6.53853
chr1	27875197	27875698	502	32.093
chr1	27914443	27914944	502	25.5355
chr1	27934806	27935307	502	14.6019
chr1	27959572	27960073	502	13.6598
chr1	27960921	27961422	502	4.53303
chr1	27966676	27967177	502	3.9073
chr1	27968655	27969156	502	4.11349
chr1	28056166	28056667	502	3.50251
chr1	28065875	28066376	502	6.22019
chr1	28078422	28078923	502	14.7899
chr1	28088398	28088899	502	23.7055
chr1	28091155	28091656	502	3.7558
chr1	28105002	28105503	502	9.77184
chr1	28112638	28113139	502	11.6624
chr1	28123610	28124111	502	5.50917
chr1	28129101	28129602	502	25.1963
chr1	28135506	28136007	502	21.9722
chr1	28144458	28144959	502	10.7185
chr1	28153099	28153600	502	5.66609
chr1	28183341	28183842	502	5.58916
chr1	28193693	28194194	502	19.3371
chr1	28196909	28197410	502	10.5347
chr1	28232754	28233255	502	5.95613
chr1	28235839	28236340	502	20.1976
chr1	28243761	28244262	502	4.08487
chr1	28247045	28247546	502	25.3167
chr1	28248902	28249403	502	10.9957
chr1	28259141	28259642	502	18.275
chr1	28260028	28260529	502	4.90555
chr1	28313920	28314421	502	11.8137
chr1	28322114	28322615	502	26.9964
chr1	28326908	28327409	502	9.00517
chr1	28327415	28327916	502	3.68598
chr1	28328724	28329225	502	6.86671
chr1	28341548	28342049	502	9.6475
chr1	28343341	28343842	502	8.81783
chr1	28348112	28348613	502	11.8959
chr1	28369500	28370001	502	20.775
chr1	28399740	28400241	502	15.0716
chr1	28417301	28417802	502	13.7937
chr1	28437236	28437737	502	8.53833
chr1	28437844	28438345	502	21.7982
chr1	28500935	28501436	502	11.4566
chr1	28505658	28506159	502	12.4419
chr1	28510560	28511061	502	6.64044
chr1	28511188	28511689	502	4.96159
chr1	28513896	28514397	502	5.17909
chr1	28514543	28515044	502	4.03312
chr1	28515102	28515603	502	8.57568
chr1	28515929	28516430	502	5.17909
chr1	28517909	28518410	502	17.5436
chr1	28518830	28519331	502	7.33121
chr1	28520246	28520747	502	5.85062
chr1	28520893	28521394	502	4.42248
chr1	28526747	28527248	502	15.2128
chr1	28552698	28553199	502	13.909
chr1	28553452	28553953	502	5.62019
chr1	28577111	28577612	502	4.32209
chr1	28577631	28578132	502	3.60273
chr1	28581198	28581699	502	3.54944
chr1	28581710	28582211	502	20.1496
chr1	28582622	28583123	502	4.9272
chr1	28586927	28587428	502	5.60688
chr1	28594609	28595110	502	4.42727
chr1	28599046	28599547	502	3.85177
chr1	28601653	28602154	502	18.1357
chr1	28642852	28643353	502	15.2353
chr1	28643743	28644244	502	4.97471
chr1	28648543	28649044	502	21.5612
chr1	28668425	28668926	502	3.98035
chr1	28669166	28669667	502	4.63934
chr1	28736536	28737037	502	14.7899
chr1	28762795	28763296	502	3.54944
chr1	28775096	28775597	502	5.17909
chr1	28785152	28785653	502	8.6238
chr1	28860356	28860857	502	16.7818
chr1	28877113	28877614	502	6.75603
chr1	28882006	28882507	502	12.4378
chr1	28884913	28885414	502	14.0621
chr1	28886801	28887302	502	10.5804
chr1	28914218	28914719	502	11.4608
chr1	28965474	28965975	502	7.37857
chr1	28972406	28972907	502	18.3421
chr1	29094393	29094894	502	3.76157
chr1	29122558	29123059	502	7.45835
chr1	29124155	29124656	502	8.66018
chr1	29181114	29181615	502	5.31798
chr1	29181846	29182347	502	15.3542
chr1	29202735	29203236	502	15.7445
chr1	29230713	29231214	502	10.898
chr1	29236255	29236756	502	4.32209
chr1	29239130	29239631	502	3.74231
chr1	29271654	29272155	502	6.84617
chr1	29513238	29513739	502	4.32209
chr1	29550191	29550692	502	8.41685
chr1	29570018	29570519	502	34.5861
chr1	29579785	29580286	502	4.43776
chr1	29584770	29585271	502	16.5212
chr1	29590800	29591301	502	20.5653
chr1	29639134	29639635	502	17.3963
chr1	29640040	29640541	502	23.5539
chr1	29649364	29649865	502	3.86772
chr1	29649913	29650414	502	6.29627
chr1	29688440	29688941	502	5.99246
chr1	29706903	29707404	502	3.97643
chr1	29709391	29709892	502	22.1004
chr1	29711852	29712353	502	17.8468
chr1	29789577	29790078	502	5.60588
chr1	29792956	29793457	502	4.24099
chr1	29851693	29852194	502	6.29193
chr1	29938996	29939497	502	6.17358
chr1	29967187	29967688	502	4.90305
chr1	29974295	29974796	502	16.4899
chr1	29985171	29985672	502	6.22019
chr1	30006227	30006728	502	10.9279
chr1	30033214	30033715	502	4.05446
chr1	30058887	30059388	502	7.37796
chr1	30083820	30084321	502	10.7185
chr1	30345665	30346166	502	3.7558
chr1	30380132	30380633	502	4.52496
chr1	30522982	30523483	502	16.0651
chr1	30525945	30526446	502	20.775
chr1	30618350	30618851	502	3.63142
chr1	30645785	30646286	502	3.9073
chr1	30649429	30649930	502	6.97281
chr1	30685287	30685788	502	8.92513
chr1	30690083	30690584	502	3.54944
chr1	30697991	30698492	502	4.79279
chr1	30700898	30701399	502	6.37601
chr1	30708008	30708509	502	3.91733
chr1	30718027	30718528	502	22.3781
chr1	30718581	30719082	502	13.5262
chr1	30719097	30719598	502	4.74866
chr1	30722091	30722592	502	3.81075
chr1	30730258	30730759	502	5.58916
chr1	30732660	30733161	502	4.88907
chr1	30741104	30741605	502	4.45991
chr1	30748700	30749201	502	18.4222
chr1	30756530	30757031	502	12.031
chr1	30778265	30778766	502	6.01883
chr1	30779549	30780050	502	4.24099
chr1	30782726	30783227	502	4.63934
chr1	30801756	30802257	502	4.13247
chr1	30809539	30810040	502	6.23996
chr1	30816489	30816990	502	32.8004
chr1	30824111	30824612	502	28.0816
chr1	30847295	30847796	502	7.10534
chr1	30858892	30859393	502	4.70572
chr1	30898825	30899326	502	13.2686
chr1	30909965	30910466	502	7.93456
chr1	30911284	30911785	502	3.53417
chr1	30933826	30934327	502	8.49742
chr1	30976059	30976560	502	5.31798
chr1	31004136	31004637	502	4.35015
chr1	31007345	31007846	502	14.7116
chr1	31013346	31013847	502	6.37601
chr1	31065535	31066036	502	18.3785
chr1	31099611	31100112	502	8.55232
chr1	31102348	31102849	502	5.72848
chr1	31154575	31155076	502	9.89501
chr1	31155235	31155736	502	7.90565
chr1	31169612	31170113	502	4.11349
chr1	31170747	31171248	502	25.5355
chr1	31182293	31182794	502	7.72078
chr1	31185600	31186101	502	3.74186
chr1	31196626	31197127	502	3.81075
chr1	31296647	31297148	502	27.923
chr1	31306187	31306688	502	5.203
chr1	31364538	31365039	502	15.0054
chr1	31372905	31373406	502	3.64461
chr1	31373448	31373949	502	8.49742
chr1	31374764	31375265	502	6.86743
chr1	31376696	31377197	502	7.34028
chr1	31377224	31377725	502	4.18002
chr1	31389990	31390491	502	4.0793
chr1	31394596	31395097	502	15.3003
chr1	31412854	31413355	502	3.7558
chr1	31413552	31414053	502	6.98849
chr1	31416238	31416739	502	6.99437
chr1	31422559	31423060	502	19.0518
chr1	31471447	31471948	502	7.2226
chr1	31477367	31477868	502	5.39864
chr1	31483270	31483771	502	10.4308
chr1	31548900	31549401	502	12.3019
chr1	31562902	31563403	502	5.08858
chr1	31573726	31574227	502	18.1141
chr1	31575506	31576007	502	10.5804
chr1	31576163	31576664	502	14.2729
chr1	31577734	31578235	502	5.84367
chr1	31579359	31579860	502	4.13247
chr1	31581738	31582239	502	8.95118
chr1	31584009	31584510	502	4.43776
chr1	31587744	31588245	502	4.08487
chr1	31591681	31592182	502	7.97083
chr1	31593924	31594425	502	7.25522
chr1	31644765	31645266	502	17.6883
chr1	31666442	31666943	502	5.62019
chr1	31669935	31670436	502	5.01759
chr1	31701034	31701535	502	4.24099
chr1	31715205	31715706	502	18.7173
chr1	31772328	31772829	502	9.6475
chr1	31788734	31789235	502	8.09646
chr1	31798585	31799086	502	14.7899
chr1	31815833	31816334	502	3.59962
chr1	31843458	31843959	502	7.25522
chr1	31937390	31937891	502	4.30366
chr1	31938269	31938770	502	17.3489
chr1	31939717	31940218	502	13.127
chr1	31942466	31942967	502	16.638
chr1	31944501	31945002	502	4.85364
chr1	31950708	31951209	502	3.96626
chr1	31954612	31955113	502	12.9945
chr1	31955927	31956428	502	14.8733
chr1	31964031	31964532	502	8.49742
chr1	32013351	32013852	502	13.535
chr1	32014533	32015034	502	5.28861
chr1	32066383	32066884	502	3.59962
chr1	32072696	32073197	502	17.8347
chr1	32108028	32108529	502	8.2458
chr1	32116093	32116594	502	12.7302
chr1	32133372	32133873	502	12.574
chr1	32179429	32179930	502	12.1686
chr1	32180113	32180614	502	7.25522
chr1	32200337	32200838	502	8.12057
chr1	32200944	32201445	502	5.95613
chr1	32205358	32205859	502	11.554
chr1	32205962	32206463	502	3.50251
chr1	32208813	32209314	502	6.05571
chr1	32215570	32216071	502	3.76157
chr1	32220652	32221153	502	8.73047
chr1	32222092	32222593	502	7.72078
chr1	32236018	32236519	502	13.1215
chr1	32240305	32240806	502	12.5789
chr1	32241232	32241733	502	10.4216
chr1	32248235	32248736	502	10.2754
chr1	32249707	32250208	502	11.3558
chr1	32291748	32292249	502	14.7116
chr1	32337281	32337782	502	6.89594
chr1	32351381	32351882	502	9.92621
chr1	32361980	32362481	502	3.80513
chr1	32393838	32394339	502	5.17909
chr1	32394455	32394956	502	22.4034
chr1	32400814	32401315	502	7.22566
chr1	32405666	32406167	502	3.70361
chr1	32406739	32407240	502	12.9945
chr1	32448248	32448749	502	5.84367
chr1	32464732	32465233	502	4.55377
chr1	32520406	32520907	502	5.70504
chr1	32539080	32539581	502	3.7558
chr1	32612053	32612554	502	17.2173
chr1	32650361	32650862	502	14.3693
chr1	32650903	32651404	502	19.4586
chr1	32695090	32695591	502	5.62019
chr1	32702690	32703191	502	3.98035
chr1	32703367	32703868	502	12.8472
chr1	32712140	32712641	502	4.02458
chr1	32716571	32717072	502	17.4973
chr1	32725099	32725600	502	15.1527
chr1	32729844	32730345	502	5.02404
chr1	32742457	32742958	502	6.75603
chr1	32743331	32743832	502	5.78317
chr1	32753647	32754148	502	8.30253
chr1	32754503	32755004	502	5.73169
chr1	32759406	32759907	502	6.89594
chr1	32759973	32760474	502	18.5712
chr1	32761405	32761906	502	8.37142
chr1	32772896	32773397	502	8.78239
chr1	32789297	32789798	502	4.45991
chr1	32817283	32817784	502	14.6494
chr1	32817952	32818453	502	9.63374
chr1	32912691	32913192	502	9.13303
chr1	32919748	32920249	502	5.51725
chr1	32925460	32925961	502	3.65515
chr1	32939565	32940066	502	5.48583
chr1	32948854	32949355	502	6.99437
chr1	32953462	32953963	502	7.25522
chr1	32954159	32954660	502	7.13326
chr1	32962095	32962596	502	6.99437
chr1	32963648	32964149	502	4.32209
chr1	32964666	32965167	502	17.4973
chr1	32972790	32973291	502	4.32241
chr1	32981128	32981629	502	22.2518
chr1	32989142	32989643	502	10.0233
chr1	32992341	32992842	502	22.6266
chr1	33007157	33007658	502	10.9111
chr1	33026136	33026637	502	4.63651
chr1	33027104	33027605	502	6.75603
chr1	33036714	33037215	502	29.6075
chr1	33050120	33050621	502	5.08858
chr1	33055088	33055589	502	3.91733
chr1	33080796	33081297	502	16.3403
chr1	33099212	33099713	502	36.696
chr1	33120396	33120897	502	5.54953
chr1	33127125	33127626	502	24.6982
chr1	33180626	33181127	502	9.75926
chr1	33181227	33181728	502	4.74866
chr1	33181869	33182370	502	6.35853
chr1	33219803	33220304	502	8.41685
chr1	33255367	33255868	502	9.89501
chr1	33295407	33295908	502	6.61649
chr1	33298568	33299069	502	4.74866
chr1	33322846	33323347	502	12.574
chr1	33327860	33328361	502	16.0651
chr1	33338737	33339238	502	5.82144
chr1	33342223	33342724	502	24.3518
chr1	33346868	33347369	502	20.9271
chr1	33350022	33350523	502	12.5789
chr1	33367694	33368195	502	4.87706
chr1	33384262	33384763	502	3.59962
chr1	33430872	33431373	502	16.191
chr1	33433598	33434099	502	14.8198
chr1	33455766	33456267	502	8.12057
chr1	33458498	33458999	502	4.45991
chr1	33470445	33470946	502	8.75055
chr1	33472300	33472801	502	26.8744
chr1	33473853	33474354	502	4.08487
chr1	33586058	33586559	502	4.52543
chr1	33763357	33763858	502	12.9945
chr1	33818048	33818549	502	4.42248
chr1	33836914	33837415	502	4.78767
chr1	33872679	33873180	502	5.60688
chr1	33903181	33903682	502	8.81783
chr1	33985623	33986124	502	4.16148
chr1	34009532	34010033	502	6.48948
chr1	34162984	34163485	502	21.5532
chr1	34199882	34200383	502	27.9778
chr1	34407082	34407583	502	4.20771
chr1	34590106	34590607	502	18.0597
chr1	34597811	34598312	502	4.45991
chr1	34684194	34684695	502	5.80027
chr1	34696146	34696647	502	4.18679
chr1	34742594	34743095	502	7.47238
chr1	34758712	34759213	502	20.149
chr1	34759398	34759899	502	8.66018
chr1	34762802	34763303	502	4.08487
chr1	34763448	34763949	502	17.5436
chr1	34779431	34779932	502	14.7116
chr1	34780970	34781471	502	8.55232
chr1	34781979	34782480	502	5.62516
chr1	34783531	34784032	502	5.8695
chr1	34786385	34786886	502	6.49602
chr1	34851624	34852125	502	5.01759
chr1	34852617	34853118	502	9.02785
chr1	34859554	34860055	502	12.8286
chr1	34866100	34866601	502	5.58916
chr1	34984051	34984552	502	3.76157
chr1	34985096	34985597	502	5.84367
chr1	35031549	35032050	502	15.78
chr1	35047359	35047860	502	6.06905
chr1	35079228	35079729	502	15.0093
chr1	35120650	35121151	502	3.81075
chr1	35191893	35192394	502	3.50008
chr1	35193060	35193561	502	13.951
chr1	35202044	35202545	502	6.25647
chr1	35264812	35265313	502	6.99437
chr1	35268525	35269026	502	8.5692
chr1	35287785	35288286	502	5.47378
chr1	35288727	35289228	502	4.57028
chr1	35298416	35298917	502	4.13247
chr1	35320023	35320524	502	13.1215
chr1	35450984	35451485	502	3.65515
chr1	35505874	35506375	502	15.8524
chr1	35555551	35556052	502	3.64461
chr1	35557408	35557909	502	29.9163
chr1	35564594	35565095	502	4.45991
chr1	35573127	35573628	502	5.01759
chr1	35577538	35578039	502	5.62019
chr1	35641342	35641843	502	10.9592
chr1	35675665	35676166	502	7.01173
chr1	35715420	35715921	502	4.53303
chr1	35718702	35719203	502	9.7888
chr1	35769708	35770209	502	18.9095
chr1	35776126	35776627	502	5.78317
chr1	35807413	35807914	502	4.21749
chr1	35808626	35809127	502	4.35015
chr1	35882904	35883405	502	10.064
chr1	35930404	35930905	502	7.89565
chr1	35930947	35931448	502	13.535
chr1	36034593	36035094	502	9.00517
chr1	36088700	36089201	502	14.0556
chr1	36089208	36089709	502	4.42727
chr1	36099564	36100065	502	8.6029
chr1	36108954	36109455	502	17.2173
chr1	36133440	36133941	502	16.0651
chr1	36149421	36149922	502	41.5641
chr1	36150703	36151204	502	27.1581
chr1	36155517	36156018	502	6.23996
chr1	36156664	36157165	502	4.47525
chr1	36160795	36161296	502	7.50672
chr1	36162029	36162530	502	19.1615
chr1	36167420	36167921	502	7.47238
chr1	36172929	36173430	502	10.8201
chr1	36187987	36188488	502	16.638
chr1	36200087	36200588	502	5.38301
chr1	36203591	36204092	502	3.70484
chr1	36224092	36224593	502	29.8771
chr1	36248245	36248746	502	10.6559
chr1	36256524	36257025	502	5.203
chr1	36257333	36257834	502	4.74622
chr1	36258328	36258829	502	8.53833
chr1	36299910	36300411	502	29.9579
chr1	36306168	36306669	502	9.77243
chr1	36306787	36307288	502	25.0516
chr1	36321456	36321957	502	8.41685
chr1	36323042	36323543	502	5.17909
chr1	36323655	36324156	502	10.6052
chr1	36326423	36326924	502	4.32241
chr1	36342743	36343244	502	14.2296
chr1	36349325	36349826	502	3.52127
chr1	36350648	36351149	502	16.2443
chr1	36351254	36351755	502	23.2615
chr1	36352889	36353390	502	7.24964
chr1	36359805	36360306	502	5.84367
chr1	36368959	36369460	502	4.67041
chr1	36373716	36374217	502	19.0216
chr1	36374544	36375045	502	26.9964
chr1	36384816	36385317	502	7.62363
chr1	36385365	36385866	502	4.21749
chr1	36385871	36386372	502	20.8961
chr1	36386460	36386961	502	34.7708
chr1	36397659	36398160	502	17.2506
chr1	36408494	36408995	502	5.47378
chr1	36420743	36421244	502	6.25647
chr1	36432532	36433033	502	7.37796
chr1	36436716	36437217	502	11.4927
chr1	36450295	36450796	502	26.9964
chr1	36464199	36464700	502	10.6944
chr1	36691413	36691914	502	18.6087
chr1	36703639	36704140	502	4.24099
chr1	37123284	37123785	502	5.99246
chr1	37454802	37455303	502	6.76999
chr1	37471606	37472107	502	22.7796
chr1	37473551	37474052	502	5.50381
chr1	37474261	37474762	502	9.7888
chr1	37476504	37477005	502	16.2713
chr1	37477242	37477743	502	16.3826
chr1	37478547	37479048	502	6.64979
chr1	37479664	37480165	502	23.8539
chr1	37487276	37487777	502	6.29193
chr1	37499061	37499562	502	5.74706
chr1	37514704	37515205	502	14.2456
chr1	37534378	37534879	502	13.7756
chr1	37554009	37554510	502	5.70504
chr1	37556638	37557139	502	8.47571
chr1	37576512	37577013	502	3.60273
chr1	37595724	37596225	502	27.0311
chr1	37690384	37690885	502	15.8931
chr1	37692124	37692625	502	27.8138
chr1	37739163	37739664	502	9.5229
chr1	37807467	37807968	502	8.73047
chr1	37808088	37808589	502	15.6931
chr1	37808603	37809104	502	5.66609
chr1	37859466	37859967	502	18.2008
chr1	37859990	37860491	502	6.86743
chr1	37865340	37865841	502	6.41055
chr1	37931633	37932134	502	25.2127
chr1	37932697	37933198	502	10.1683
chr1	37946810	37947311	502	7.89565
chr1	37958644	37959145	502	4.08487
chr1	37989942	37990443	502	24.7474
chr1	37995745	37996246	502	3.61155
chr1	37999517	38000018	502	7.24964
chr1	38012380	38012881	502	23.6224
chr1	38027955	38028456	502	4.26912
chr1	38029937	38030438	502	8.87768
chr1	38038818	38039319	502	10.0316
chr1	38046807	38047308	502	7.25289
chr1	38047311	38047812	502	4.35015
chr1	38126076	38126577	502	4.19302
chr1	38138474	38138975	502	36.1969
chr1	38173278	38173779	502	6.41055
chr1	38246820	38247321	502	5.50381
chr1	38745405	38745906	502	3.96626
chr1	38783594	38784095	502	4.90491
chr1	38858844	38859345	502	7.74726
chr1	38859619	38860120	502	17.4973
chr1	38873224	38873725	502	18.3421
chr1	38941630	38942131	502	5.48583
chr1	38990979	38991480	502	13.535
chr1	38992031	38992532	502	3.70484
chr1	39026463	39026964	502	13.3969
chr1	39047755	39048256	502	5.203
chr1	39086324	39086825	502	4.30366
chr1	39092285	39092786	502	3.76157
chr1	39098490	39098991	502	7.17288
chr1	39102435	39102936	502	4.52496
chr1	39104930	39105431	502	4.7657
chr1	39106119	39106620	502	5.84367
chr1	39132974	39133475	502	5.31798
chr1	39142564	39143065	502	10.4134
chr1	39154580	39155081	502	8.37142
chr1	39158525	39159026	502	6.53004
chr1	39159143	39159644	502	15.0054
chr1	39178474	39178975	502	17.9987
chr1	39179052	39179553	502	7.13326
chr1	39183692	39184193	502	22.3403
chr1	39185678	39186179	502	9.89769
chr1	39192050	39192551	502	23.7691
chr1	39204470	39204971	502	6.49602
chr1	39205055	39205556	502	4.90555
chr1	39293324	39293825	502	10.9535
chr1	39387378	39387879	502	8.2458
chr1	39391988	39392489	502	18.1509
chr1	39394519	39395020	502	7.12178
chr1	39395333	39395834	502	19.556
chr1	39398539	39399040	502	31.1574
chr1	39408529	39409030	502	22.3406
chr1	39409376	39409877	502	3.50251
chr1	39410816	39411317	502	7.13326
chr1	39414051	39414552	502	3.65515
chr1	39434942	39435443	502	10.0379
chr1	39491288	39491789	502	9.92621
chr1	39539122	39539623	502	5.82144
chr1	39559302	39559803	502	5.43349
chr1	39576648	39577149	502	4.52947
chr1	39605804	39606305	502	9.23961
chr1	39609539	39610040	502	3.72314
chr1	39688657	39689158	502	7.42539
chr1	39691217	39691718	502	10.7185
chr1	39738613	39739114	502	10.4427
chr1	39788727	39789228	502	8.43566
chr1	39799187	39799688	502	8.53833
chr1	39799736	39800237	502	10.2895
chr1	39816693	39817194	502	6.89594
chr1	39817290	39817791	502	4.53303
chr1	39845599	39846100	502	9.13303
chr1	39883254	39883755	502	6.61498
chr1	39893115	39893616	502	5.74706
chr1	39901085	39901586	502	4.01009
chr1	39902030	39902531	502	12.7163
chr1	39919443	39919944	502	7.81493
chr1	39926379	39926880	502	5.01759
chr1	39934186	39934687	502	5.2454
chr1	39954903	39955404	502	11.6839
chr1	39955776	39956277	502	7.8713
chr1	39980515	39981016	502	4.77149
chr1	39981905	39982406	502	8.87768
chr1	39991425	39991926	502	3.85393
chr1	40039791	40040292	502	12.2585
chr1	40040318	40040819	502	22.8194
chr1	40042287	40042788	502	4.02458
chr1	40084650	40085151	502	4.57899
chr1	40097001	40097502	502	6.98849
chr1	40143905	40144406	502	3.52422
chr1	40161079	40161580	502	12.2048
chr1	40186381	40186882	502	4.02458
chr1	40241753	40242254	502	10.5624
chr1	40257730	40258231	502	16.638
chr1	40270137	40270638	502	4.68124
chr1	40305009	40305510	502	4.42248
chr1	40315204	40315705	502	5.01759
chr1	40373401	40373902	502	10.1683
chr1	40374429	40374930	502	9.15111
chr1	40449865	40450366	502	14.6682
chr1	40450810	40451311	502	3.86772
chr1	40477076	40477577	502	3.72378
chr1	40508494	40508995	502	10.0379
chr1	40531385	40531886	502	16.7818
chr1	40612257	40612758	502	6.76999
chr1	40625028	40625529	502	3.81075
chr1	40625921	40626422	502	3.59962
chr1	40628763	40629264	502	19.1129
chr1	40634867	40635368	502	3.70484
chr1	40665606	40666107	502	3.65515
chr1	40691585	40692086	502	12.7163
chr1	40692114	40692615	502	8.19302
chr1	40708954	40709455	502	14.5092
chr1	40711312	40711813	502	7.37796
chr1	40783437	40783938	502	3.61155
chr1	40818517	40819018	502	4.02458
chr1	40841581	40842082	502	3.53417
chr1	40842139	40842640	502	7.50672
chr1	40847302	40847803	502	6.61649
chr1	40848464	40848965	502	4.48623
chr1	40862255	40862756	502	23.9432
chr1	40868238	40868739	502	7.48396
chr1	40875676	40876177	502	19.6847
chr1	40877645	40878146	502	16.7898
chr1	40897459	40897960	502	12.8286
chr1	40898422	40898923	502	7.6224
chr1	40899442	40899943	502	4.74866
chr1	40901920	40902421	502	7.50672
chr1	40919385	40919886	502	6.59431
chr1	40944265	40944766	502	12.8286
chr1	40944925	40945426	502	13.5472
chr1	40948751	40949252	502	5.35893
chr1	40952395	40952896	502	3.65515
chr1	40967763	40968264	502	25.2506
chr1	40979545	40980046	502	17.6543
chr1	40980687	40981188	502	3.97643
chr1	40986484	40986985	502	7.01173
chr1	41003588	41004089	502	25.4717
chr1	41045610	41046111	502	9.26124
chr1	41073924	41074425	502	4.90491
chr1	41109246	41109747	502	9.63374
chr1	41123144	41123645	502	9.4884
chr1	41149513	41150014	502	3.54944
chr1	41152547	41153048	502	13.1215
chr1	41174125	41174626	502	6.11595
chr1	41241191	41241692	502	4.63934
chr1	41268054	41268555	502	7.8713
chr1	41277567	41278068	502	4.79279
chr1	41360970	41361471	502	12.1717
chr1	41361477	41361978	502	3.50008
chr1	41382506	41383007	502	5.07008
chr1	41417009	41417510	502	3.60273
chr1	41418794	41419295	502	17.6375
chr1	41432671	41433172	502	26.3453
chr1	41455923	41456424	502	13.535
chr1	41476766	41477267	502	3.80513
chr1	41484386	41484887	502	16.3826
chr1	41485572	41486073	502	11.2962
chr1	41486225	41486726	502	17.9987
chr1	41490873	41491374	502	3.64461
chr1	41493003	41493504	502	20.6304
chr1	41496148	41496649	502	6.99437
chr1	41498743	41499244	502	18.2323
chr1	41500344	41500845	502	19.3371
chr1	41501585	41502086	502	16.3826
chr1	41504035	41504536	502	17.7781
chr1	41515094	41515595	502	14.3072
chr1	41516048	41516549	502	12.7104
chr1	41574008	41574509	502	4.01009
chr1	41623678	41624179	502	8.05457
chr1	41626118	41626619	502	8.86519
chr1	41626929	41627430	502	8.86519
chr1	41629509	41630010	502	5.38301
chr1	41631920	41632421	502	4.90555
chr1	41662265	41662766	502	3.61155
chr1	41662801	41663302	502	5.07008
chr1	41665190	41665691	502	6.74097
chr1	41670437	41670938	502	9.21903
chr1	41672184	41672685	502	13.8367
chr1	41712631	41713132	502	3.54944
chr1	41713713	41714214	502	6.13741
chr1	41738995	41739496	502	4.21749
chr1	41742170	41742671	502	3.59962
chr1	41751949	41752450	502	4.30449
chr1	41783088	41783589	502	14.2729
chr1	41840760	41841261	502	16.6397
chr1	41851553	41852054	502	7.25728
chr1	41862231	41862732	502	6.61498
chr1	41862819	41863320	502	12.9842
chr1	41870036	41870537	502	4.0649
chr1	41900555	41901056	502	8.78239
chr1	41902076	41902577	502	5.14312
chr1	41919953	41920454	502	14.1272
chr1	41936040	41936541	502	4.20771
chr1	41954439	41954940	502	15.2608
chr1	41955443	41955944	502	29.2954
chr1	41957556	41958057	502	13.5472
chr1	42035185	42035686	502	7.45835
chr1	42035828	42036329	502	6.18243
chr1	42165692	42166193	502	11.4927
chr1	42222171	42222672	502	5.72848
chr1	42226292	42226793	502	3.50251
chr1	42334423	42334924	502	3.52917
chr1	42335235	42335736	502	8.09646
chr1	42340060	42340561	502	7.48396
chr1	42368369	42368870	502	11.554
chr1	42380494	42380995	502	3.72378
chr1	42456460	42456961	502	10.5288
chr1	42462946	42463447	502	23.1322
chr1	42484311	42484812	502	5.73169
chr1	42529822	42530323	502	12.5984
chr1	42658104	42658605	502	19.7041
chr1	42682049	42682550	502	20.0537
chr1	42743111	42743612	502	4.55377
chr1	42765877	42766378	502	6.61649
chr1	42766957	42767458	502	30.9969
chr1	42816964	42817465	502	7.77421
chr1	42846269	42846770	502	19.9941
chr1	42922902	42923403	502	7.2226
chr1	42924179	42924680	502	17.9188
chr1	42932016	42932517	502	11.1675
chr1	42936491	42936992	502	7.99574
chr1	42937159	42937660	502	6.18243
chr1	42940977	42941478	502	20.6153
chr1	42941652	42942153	502	7.81493
chr1	42943138	42943639	502	11.4927
chr1	42950146	42950647	502	6.23996
chr1	42952492	42952993	502	6.05571
chr1	42958046	42958547	502	4.64726
chr1	42958729	42959230	502	17.2414
chr1	42961215	42961716	502	5.43349
chr1	42962559	42963060	502	11.554
chr1	42967026	42967527	502	18.9656
chr1	42973240	42973741	502	4.90555
chr1	43021773	43022274	502	3.86866
chr1	43058505	43059006	502	3.81075
chr1	43147586	43148087	502	4.26912
chr1	43172081	43172582	502	8.41685
chr1	43206772	43207273	502	16.208
chr1	43270396	43270897	502	7.1364
chr1	43285411	43285912	502	9.5229
chr1	43293062	43293563	502	3.73728
chr1	43294298	43294799	502	4.52543
[truncated: 66,408 more rows]

## Sheet: Supplementary Table_5
Supplementary Table 5: Matrix of variants overlapping open chromatin (spm3.5) in kidney and PTC
RSID: Reference SNP ID; Locus_id: ID of the corresponding locus ('n' for novel, 'k' for known); Signal_id: ID of independent signal within a locus; EA: Effect allele; EAF: Effect allele frequency, PPA:Posterior probability of association (probability of a variant to be the causal variant for the association signal)
seqnames	start	end	P.value	RSID	Locus_id	Signal_id	EA	EAF	cPPP	PPA	bun_association	cys_association	Kidney_all_variants	PTC_all_variants	Kidney_PPA-filtered_variants	PTC_PPA-filtered_variants
chr15	45345145	45345145	2.62374e-81	rs35861938	k1	1	T	0.6237	0.706073	0.0388001	no	no	1	0	1	0
chr15	45362129	45362129	7.277e-81	rs1145086	k1	1	A	0.6237	0.960466	0.0140615	no	no	1	0	0	0
chr15	45648764	45648764	2.89783e-06	rs72715005	k1	3	A	0.1129	0.945556	0.000736431	no	no	0	1	0	0
chr15	45617106	45617106	8.11691e-06	rs3649	k1	3	T	0.891	0.977951	0.000285091	no	no	0	1	0	0
chr15	45279205	45279205	1.12954e-05	rs78212061	k1	3	C	0.8981	0.981964	0.000207359	no	no	1	1	0	0
chr15	45430441	45430441	1.31814e-05	rs56327050	k1	3	A	0.8784	0.983816	0.000170303	no	no	1	1	0	0
chr15	45448194	45448194	1.8084e-05	rs9806699	k1	3	A	0.2862	0.989408	9.37407e-05	no	no	0	1	0	0
chr12	48350416	48350416	3.962e-16	rs2732439	k100	1	a	0.5465	0.963763	0.0396521	no	no	0	1	0	1
chr11	5550667	5550667	6.892e-21	rs396341	k101	1	t	0.2588	0.160028	0.0283914	yes	yes	0	1	0	1
chr11	5550874	5550874	6.814e-21	rs1874828	k101	1	a	0.2588	0.188359	0.0283313	yes	yes	0	1	0	1
chr11	5550928	5550928	7.859e-21	rs429957	k101	1	a	0.7412	0.370972	0.0250874	yes	yes	0	1	0	1
chr2	54657733	54657733	3.13779e-17	rs966003	k104	1	T	0.3938	0.625217	0.270851	no	yes	1	0	1	0
chr2	54560203	54560203	8.01416e-15	rs12713261	k104	1	T	0.6481	0.990792	0.00120929	no	yes	0	1	0	0
chr2	54347805	54347805	4.59058e-12	rs1405833	k104	2	C	0.8026	0.718641	0.0386068	no	yes	1	1	1	1
chr2	54360459	54360459	7.46273e-12	rs2280718	k104	2	T	0.8	0.952674	0.0238977	no	yes	1	0	0	0
chr16	69755293	69755293	9.228e-15	rs56259873	k105	1	t	0.1639	0.937452	0.0133084	yes	yes	1	0	0	0
chr16	69741597	69741597	1.929e-14	rs17299478	k105	1	t	0.1637	0.944018	0.00656557	yes	yes	0	1	0	0
chr16	69565900	69565900	9.706e-14	rs8048032	k105	1	a	0.1511	0.988907	0.00138394	yes	yes	1	1	0	0
chr11	47408353	47408353	3.431e-15	rs7947450	k106	1	a	0.3845	0.632022	0.0540124	yes	yes	1	1	1	1
chr11	47409048	47409048	4.326e-15	rs11039225	k106	1	a	0.3845	0.823823	0.0431064	yes	yes	1	1	1	1
chr1	56456904	56456904	5.80293e-10	rs76616650	k108	2	T	0.0381	0.501705	0.0428251	yes	yes	0	1	0	1
chr1	56450345	56450345	6.34008e-10	rs77049555	k108	2	A	0.0381	0.707482	0.0393445	yes	yes	1	0	1	0
chr15	98731097	98731097	4.523e-14	rs4966019	k109	1	t	0.64	0.666347	0.0511479	yes	yes	0	1	0	1
chr15	98727906	98727906	5.668e-14	rs6598541	k109	1	a	0.3578	0.707076	0.0407291	yes	yes	1	1	1	1
chr15	98724801	98724801	4.708e-12	rs932071	k109	1	a	0.3175	0.990191	0.000562949	yes	yes	1	0	0	0
chr6	160348391	160348391	2.25542e-08	rs555754	k11	10	A	0.4741	0.290792	0.0391482	no	no	1	0	1	0
chr6	160355293	160355293	7.3776e-08	rs675162	k11	10	A	0.5142	0.782567	0.0124794	no	no	0	1	0	0
chr6	160348779	160348779	9.29608e-08	rs668871	k11	10	T	0.4748	0.792522	0.00995495	no	no	0	1	0	0
chr6	160354985	160354985	1.05675e-07	rs543159	k11	10	A	0.4759	0.801325	0.0088034	no	no	0	1	0	0
chr6	160387012	160387012	7.54279e-07	rs2313453	k11	10	T	0.4926	0.962647	0.00132217	no	no	0	1	0	0
chr6	159969939	159969939	2.17791e-06	rs115657196	k11	10	A	0.912	0.982574	0.000844224	no	no	1	1	0	0
chr6	160255184	160255184	1.17614e-84	rs3798156	k11	1	T	0.1359	0.962382	0.0102691	no	no	1	1	0	0
chr6	160254732	160254732	2.66932e-54	rs316009	k11	2	T	0.1065	0.970845	0.169982	no	no	0	1	0	1
chr6	160167977	160167977	4.47199e-11	rs9457848	k11	7	A	0.9214	0.984114	0.0104729	no	no	0	1	0	0
chr6	159970157	159970157	9.39189e-06	rs9456484	k11	9	T	0.0976	0.990027	0.000506581	no	no	1	1	0	0
chr3	49358324	49358324	1.00687e-10	rs1800668	k110	1	A	0.3129	0.65236	0.0108936	no	yes	1	1	0	0
chr3	52771077	52771077	9.45565e-15	rs998909	k110	2	A	0.5846	0.933491	0.00600353	no	yes	1	1	0	0
chr3	52714841	52714841	2.59032e-14	rs11716747	k110	2	T	0.4153	0.963247	0.00223414	no	yes	1	1	0	0
chr3	52704149	52704149	3.37371e-14	rs12635140	k110	2	T	0.5848	0.967105	0.00172597	no	yes	0	1	0	0
chr3	52706166	52706166	4.05954e-14	rs6617	k110	2	C	0.5846	0.970017	0.00143881	no	yes	1	1	0	0
chr3	53040808	53040808	1.19538e-08	rs13100714	k110	3	T	0.899	0.631486	0.0107366	no	yes	0	1	0	0
chr3	53046132	53046132	1.93976e-08	rs2564941	k110	3	A	0.101	0.858369	0.00672075	no	yes	1	0	0	0
chr3	48402409	48402409	2.43413e-08	rs7651407	k110	4	T	0.4573	0.0231554	0.0231554	no	yes	0	1	0	0
chr3	48440024	48440024	3.94273e-08	rs9876891	k110	4	T	0.4567	0.503038	0.0137571	no	yes	1	1	0	0
chr3	48446507	48446507	4.32971e-08	rs9881491	k110	4	A	0.4567	0.6596	0.0125762	no	yes	1	0	0	0
chr3	48440237	48440237	4.41309e-08	rs3774808	k110	4	A	0.4616	0.671967	0.0123672	no	yes	1	1	0	0
chr9	116504416	116504416	5.67337e-19	rs4836732	k112	1	T	0.5286	0.446037	0.446037	yes	yes	0	1	0	1
chr9	116547246	116547246	3.96888e-18	rs4837613	k112	1	C	0.4893	0.903216	0.065909	yes	yes	1	0	1	0
chr9	116687467	116687467	0.000191907	rs112643631	k112	2	T	0.093	0.990153	0.000170892	yes	yes	1	1	0	0
chr3	63863367	63863367	6.149e-16	rs2276863	k115	1	a	0.1327	0.869024	0.0124161	yes	yes	0	1	0	0
chr7	32892294	32892294	1.15747e-14	rs1817050	k116	1	T	0.6016	0.122804	0.0545215	no	yes	0	1	0	1
chr7	33063100	33063100	2.18994e-10	rs10262141	k116	2	C	0.7098	0.83157	0.0099289	no	yes	0	1	0	0
chr7	33044360	33044360	2.22641e-10	rs7801986	k116	2	T	0.7102	0.870878	0.00976226	no	yes	1	0	0	0
chr7	33062850	33062850	2.27425e-10	rs13228639	k116	2	T	0.7049	0.899729	0.00957861	no	yes	1	1	0	0
chr7	33062902	33062902	2.35107e-10	rs13228827	k116	2	A	0.7101	0.918549	0.00927502	no	yes	1	1	0	0
chr7	33055370	33055370	2.60654e-10	rs10251079	k116	2	T	0.7099	0.945124	0.00839244	no	yes	1	0	0	0
chr16	72990377	72990377	1.244e-16	rs1858800	k117	1	t	0.3474	0.873949	0.873949	no	yes	1	0	1	0
chr6	43838872	43838872	8.32399e-74	rs881858	k12	1	A	0.6967	0.994921	0.994921	no	yes	0	1	0	1
chr6	43427363	43427363	5.57267e-08	rs75320251	k12	4	A	0.1106	0.971147	0.0016088	no	yes	1	1	0	0
chr3	136142824	136142824	2.659e-16	rs9881400	k120	1	t	0.2704	0.763952	0.00629305	yes	yes	0	1	0	0
chr2	280819	280819	3.555e-14	rs7605824	k122	1	a	0.3499	0.36101	0.0324421	yes	yes	1	0	1	0
chr2	228088	228088	4.341e-14	rs57542652	k122	1	a	0.3492	0.55597	0.0260346	yes	yes	1	0	1	0
chr2	264227	264227	5.596e-14	rs7584915	k122	1	a	0.3499	0.76884	0.0203543	yes	yes	0	1	0	0
chr2	264019	264019	1.115e-13	rs7595075	k122	1	a	0.3486	0.953715	0.0103113	yes	yes	0	1	0	0
chr2	264621	264621	1.337e-13	rs114976176	k122	1	a	0.65	0.972135	0.00873011	yes	yes	1	0	0	0
chr1	171486183	171486183	5.17836e-07	rs34720381	k123	1	T	0.0948	0.751423	0.00404441	yes	yes	0	1	0	0
chr1	171600366	171600366	4.55641e-07	rs235885	k123	1	C	0.8204	0.758702	0.00363059	yes	yes	0	1	0	0
chr1	171601134	171601134	9.92606e-07	rs235887	k123	1	T	0.1795	0.949809	0.001721	yes	yes	1	0	0	0
chr1	171486140	171486140	6.98912e-06	rs12733939	k123	1	A	0.8346	0.989507	0.000306369	yes	yes	0	1	0	0
chr1	172383850	172383850	2.09712e-09	rs714515	k123	3	A	0.5684	0.23303	0.049897	yes	yes	0	1	0	1
chr1	172343629	172343629	3.2239e-09	rs9425291	k123	3	A	0.4334	0.473339	0.0329897	yes	yes	0	1	0	1
chr1	172391024	172391024	1.05453e-08	rs2227198	k123	3	A	0.4319	0.97401	0.0105088	yes	yes	1	1	0	0
chr1	172118179	172118179	6.0247e-08	rs17350586	k123	4	T	0.7175	0.42028	0.089314	yes	yes	0	1	0	1
chr1	172117958	172117958	7.57758e-08	rs16843855	k123	4	T	0.2824	0.576477	0.0716195	yes	yes	0	1	0	1
chr1	172090206	172090206	1.59212e-07	rs4540689	k123	4	T	0.2811	0.848719	0.0350764	yes	yes	1	1	1	1
chr1	171868566	171868566	8.86111e-05	rs78682777	k123	4	A	0.9832	0.98775	0.000220917	yes	yes	1	0	0	0
chr6	154555582	154555582	2.79636e-12	rs17085528	k124	2	T	0.8125	0.948676	0.0115715	yes	yes	1	1	0	0
chr14	88554903	88554903	4.191e-13	rs3742681	k125	1	a	0.6567	0.971951	0.00122741	yes	yes	1	1	0	0
chr14	88545833	88545833	5.706e-13	rs2052989	k125	1	a	0.652	0.983316	0.000925373	yes	yes	0	1	0	0
chr14	88551622	88551622	6.324e-13	rs7146241	k125	1	t	0.3481	0.989436	0.000830393	yes	yes	1	1	0	0
chr13	50081853	50081853	5.25427e-16	rs41284816	k126	1	T	0.0225	0.858346	0.858346	no	yes	0	1	0	1
chr13	50513307	50513307	1.22139e-13	rs202346	k126	2	A	0.2564	0.92606	0.00861899	no	yes	1	0	0	0
chr17	36544998	36544998	3.116e-14	rs3736167	k127	1	a	0.5913	0.373336	0.0481235	yes	yes	0	1	0	1
chr17	36544793	36544793	3.256e-14	rs3736165	k127	1	a	0.4089	0.465655	0.0458445	yes	yes	0	1	0	1
chr17	36534535	36534535	3.713e-14	rs2291285	k127	1	a	0.4094	0.638744	0.0410847	yes	yes	0	1	0	1
chr17	36592931	36592931	1.876e-13	rs1005551	k127	1	t	0.4091	0.942894	0.00837305	yes	yes	0	1	0	0
chr6	51644819	51644819	2.70926e-11	rs2661503	k128	1	A	0.3778	0.98812	0.0100626	no	yes	0	1	0	0
chr6	50850526	50850526	6.05875e-08	rs2746646	k128	4	T	0.5503	0.53826	0.0169909	no	yes	1	1	0	0
chr6	50928082	50928082	6.29e-08	rs1178066	k128	4	A	0.4655	0.621688	0.0161336	no	yes	0	1	0	0
chr6	50928129	50928129	1.5911e-06	rs1928188	k128	4	C	0.393	0.973235	0.000734629	no	yes	0	1	0	0
chr6	50927690	50927690	1.83752e-06	rs987842	k128	4	T	0.393	0.982023	0.000640004	no	yes	0	1	0	0
chr22	30560135	30560135	5.20549e-08	rs35908001	k129	2	T	0.0821	0.808781	0.0255875	no	no	1	0	1	0
chr2	27566994	27566994	4.19788e-07	rs965813	k13	2	A	0.2158	0.815564	0.0145405	no	yes	0	1	0	0
chr2	27729368	27729368	3.23738e-06	rs2384655	k13	2	A	0.242	0.964707	0.00198038	no	yes	1	1	0	0
chr2	27765954	27765954	1.01207e-05	rs13013484	k13	2	A	0.7238	0.978735	0.000643461	no	yes	1	1	0	0
chr2	27729539	27729539	1.42233e-05	rs12994085	k13	2	T	0.7586	0.981453	0.000501068	no	yes	1	1	0	0
chr2	27844103	27844103	1.96634e-05	rs11127128	k13	2	A	0.1927	0.985292	0.000384142	no	yes	0	1	0	0
chr2	27844037	27844037	3.23802e-05	rs11127127	k13	2	T	0.1924	0.987775	0.000240013	no	yes	0	1	0	0
chr11	69166584	69166584	1.44274e-10	rs1011175	k130	1	A	0.5995	0.987424	0.00151162	yes	yes	0	1	0	0
chr11	69112447	69112447	3.79033e-07	rs56238214	k130	2	T	0.97	0.988304	0.00114475	yes	yes	1	0	0	0
chr1	18481562	18481562	8.885e-15	rs7515150	k131	1	c	0.1287	0.119406	0.119406	no	yes	1	1	1	1
chr1	18481575	18481575	9.305e-15	rs7528572	k131	1	a	0.8713	0.232585	0.113179	no	yes	1	1	1	1
chr1	18481042	18481042	1.26e-14	rs7512414	k131	1	t	0.1287	0.317639	0.0850539	no	yes	1	1	1	1
chr1	18481126	18481126	1.937e-14	rs34109355	k131	1	c	0.1287	0.630092	0.0551029	no	yes	1	1	1	1
chr1	18481287	18481287	2.198e-14	rs35013594	k131	1	t	0.1287	0.729217	0.0485712	no	yes	1	1	1	1
chr1	18481261	18481261	2.267e-14	rs34976233	k131	1	a	0.1288	0.776673	0.0474568	no	yes	1	1	1	1
chr1	18481459	18481459	3.109e-14	rs11261022	k131	1	a	0.3578	0.959143	0.026383	no	yes	1	1	1	1
chr6	89385125	89385125	7.93297e-14	rs11963273	k134	1	T	0.7622	0.980825	0.00507008	yes	yes	0	1	0	0
chr6	89412231	89412231	8.30408e-10	rs854922	k134	2	A	0.0917	0.931559	0.931559	yes	yes	1	1	1	1
chr17	56699594	56699594	9.865e-15	rs227727	k136	1	a	0.5418	0.921907	0.162056	no	no	1	1	1	1
chr3	169379545	169379545	2.127e-13	rs80292783	k137	1	a	0.8691	0.285135	0.130762	yes	yes	0	1	0	1
chr1	207078173	207078173	7.574e-13	rs1564879	k138	1	a	0.4737	0.925776	0.0110715	yes	yes	1	0	0	0
chr1	207051647	207051647	9.657e-13	rs2306714	k138	1	a	0.4082	0.934821	0.00904544	yes	yes	1	1	0	0
chr5	132437982	132437982	1.66506e-11	rs62385693	k139	3	T	0.8057	0.187856	0.0554428	no	no	1	1	1	1
chr5	132445653	132445653	2.44639e-11	rs1012793	k139	3	C	0.1948	0.462903	0.0380663	no	no	0	1	0	1
chr5	132458606	132458606	3.16138e-11	rs2405528	k139	3	A	0.1962	0.627434	0.029543	no	no	0	1	0	1
chr5	132445596	132445596	3.41044e-11	rs7730247	k139	3	A	0.8052	0.738814	0.0276026	no	no	0	1	0	1
chr5	132471932	132471932	2.6125e-10	rs2057655	k139	3	A	0.1936	0.887226	0.00384863	no	no	0	1	0	0
chr5	132419959	132419959	5.85112e-10	rs1003533	k139	3	T	0.1939	0.902169	0.00174553	no	no	1	1	0	0
chr5	132369574	132369574	6.17744e-10	rs2631369	k139	3	C	0.3065	0.911231	0.00145255	no	no	1	1	0	0
chr5	132364266	132364266	6.24245e-10	rs200837	k139	3	A	0.6934	0.912668	0.00143709	no	no	1	0	0	0
chr5	132377534	132377534	7.33254e-10	rs274570	k139	3	T	0.3014	0.932318	0.0012332	no	no	1	0	0	0
chr5	132321304	132321304	9.26915e-10	rs270601	k139	3	T	0.3014	0.959826	0.000981767	no	no	1	0	0	0
chr5	132369605	132369605	9.43116e-10	rs2631368	k139	3	T	0.6935	0.960789	0.000962873	no	no	1	1	0	0
chr5	132354548	132354548	1.19072e-09	rs272849	k139	3	A	0.3789	0.970301	0.000732058	no	no	1	0	0	0
chr5	132321007	132321007	1.45817e-09	rs270602	k139	3	T	0.3786	0.974867	0.000602189	no	no	1	0	0	0
chr5	132254841	132254841	1.61247e-09	rs7727544	k139	3	T	0.5497	0.977165	0.0005349	no	no	1	0	0	0
chr5	132254564	132254564	1.65502e-09	rs7727038	k139	3	T	0.5497	0.978206	0.000519943	no	no	1	0	0	0
chr5	132378717	132378717	1.81016e-09	rs274567	k139	3	T	0.3779	0.979704	0.000488707	no	no	0	1	0	0
chr5	132260726	132260726	2.21149e-09	rs10076701	k139	3	T	0.4503	0.982595	0.000392406	no	no	0	1	0	0
chr5	132365587	132365587	2.69974e-09	rs367805	k139	3	T	0.3114	0.984752	0.000343997	no	no	0	1	0	0
chr5	132266027	132266027	2.87924e-09	rs1979981	k139	3	A	0.6503	0.986382	0.000315571	no	no	1	1	0	0
chr5	132263954	132263954	3.26954e-09	rs4361510	k139	3	T	0.6503	0.988185	0.000278879	no	no	0	1	0	0
chr7	127751798	127751798	4.373e-15	rs1348103	k142	1	a	0.7122	0.303286	0.0309439	no	yes	0	1	0	1
chr7	127651967	127651967	1.022e-14	rs73234874	k142	1	a	0.2875	0.895693	0.0135157	no	yes	1	1	0	0
chr7	127651950	127651950	1.109e-14	rs73234873	k142	1	t	0.2875	0.920896	0.0122696	no	yes	1	1	0	0
chr19	49056436	49056436	8.05534e-07	rs79891871	k143	2	T	0.7916	0.979846	0.00335091	no	yes	1	1	0	0
chr10	49749468	49749468	5.052e-15	rs1258179	k144	1	a	0.4901	0.235812	0.235812	no	yes	1	0	1	0
chr10	49749277	49749277	3.621e-14	rs1258178	k144	1	c	0.4767	0.841383	0.0334788	no	yes	1	0	1	0
chr1	78089278	78089278	1.275e-10	rs571988	k146	1	t	0.2533	0.977069	0.000456034	yes	yes	1	0	0	0
chr1	78070800	78070800	1.405e-10	rs11162412	k146	1	t	0.2543	0.983633	0.000408789	yes	yes	1	1	0	0
chr1	78145451	78145451	1.486e-10	rs558643	k146	1	t	0.2274	0.984039	0.000406411	yes	yes	1	1	0	0
chr1	78145383	78145383	1.567e-10	rs637943	k146	1	c	0.7726	0.987202	0.000383072	yes	yes	1	1	0	0
chr1	78145185	78145185	1.628e-10	rs561289	k146	1	a	0.2275	0.988706	0.000368279	yes	yes	1	1	0	0
chr21	36461453	36461453	7.852e-15	rs219779	k147	1	a	0.2566	0.411339	0.0672097	yes	yes	0	1	0	1
chr21	36464080	36464080	1.657e-13	rs219767	k147	1	t	0.237	0.984528	0.00360012	yes	yes	0	1	0	0
chr7	129825769	129825769	8.43424e-13	rs117647646	k149	1	A	0.9078	0.146497	0.00635931	yes	yes	1	1	0	0
chr7	129830442	129830442	9.54903e-13	rs76522594	k149	1	T	0.094	0.211938	0.00564289	yes	yes	0	1	0	0
chr7	129906832	129906832	9.91393e-13	rs75287736	k149	1	T	0.9084	0.245	0.00544234	yes	yes	1	0	0	0
chr7	129830231	129830231	1.01545e-12	rs78138358	k149	1	A	0.0941	0.266515	0.00531763	yes	yes	0	1	0	0
chr7	129851317	129851317	1.09472e-12	rs12534320	k149	1	T	0.9084	0.367975	0.00494125	yes	yes	0	1	0	0
chr7	129896815	129896815	1.17149e-12	rs12534043	k149	1	T	0.9084	0.482255	0.00463421	yes	yes	0	1	0	0
chr7	129907168	129907168	1.22702e-12	rs74756677	k149	1	A	0.0941	0.549767	0.00442254	yes	yes	1	0	0	0
chr7	129845890	129845890	1.24036e-12	rs76843721	k149	1	A	0.9084	0.562935	0.00437581	yes	yes	0	1	0	0
chr7	129896773	129896773	1.44925e-12	rs12536424	k149	1	A	0.9084	0.85179	0.00376067	yes	yes	0	1	0	0
chr7	129948107	129948107	1.52822e-12	rs1464970	k149	1	A	0.0933	0.880997	0.00361592	yes	yes	0	1	0	0
chr7	129865030	129865030	1.93654e-12	rs12534061	k149	1	A	0.0943	0.959947	0.00283391	yes	yes	1	0	0	0
chr8	23890907	23890907	3.3668e-76	rs34861762	k15	1	T	0.4167	0.68839	0.18082	yes	yes	0	1	0	1
chr8	23890723	23890723	7.7221e-12	rs73555379	k15	2	T	0.0759	0.650347	0.0169861	yes	yes	0	1	0	0
chr9	33172919	33172919	5.91221e-10	rs13296902	k150	2	T	0.1078	0.223657	0.109286	yes	no	1	0	1	0
chr3	126191538	126191538	1.55703e-15	rs9862438	k151	1	T	0.4237	0.970557	0.0847018	no	no	1	0	1	0
chr11	121754619	121754619	2.456e-12	rs2156665	k152	1	t	0.7863	0.744297	0.00507639	yes	yes	1	0	0	0
chr11	121755074	121755074	2.643e-12	rs1893845	k152	1	t	0.7863	0.763763	0.0047649	yes	yes	1	0	0	0
chr11	121754969	121754969	2.926e-12	rs1893844	k152	1	c	0.7864	0.822311	0.00431678	yes	yes	1	0	0	0
chr11	121722677	121722677	4.418e-12	rs1893841	k152	1	a	0.7388	0.938859	0.00270888	yes	yes	1	1	0	0
chr20	62026447	62026447	3.72495e-08	rs4266091	k153	2	A	0.8937	0.618502	0.0179318	yes	yes	1	0	0	0
chr20	62026068	62026068	1.13725e-07	rs7509143	k153	2	C	0.126	0.933559	0.00583081	yes	yes	1	1	0	0
chr20	62064257	62064257	1.71682e-07	rs3746650	k153	2	A	0.1059	0.973191	0.0042287	yes	yes	1	1	0	0
chr1	93585354	93585354	1.902e-14	rs7543734	k155	1	c	0.2029	0.497191	0.115818	yes	yes	1	1	1	1
chr1	93585307	93585307	4.903e-14	rs7511890	k155	1	a	0.7976	0.541447	0.0442563	yes	yes	1	1	1	1
chr1	93585429	93585429	6.028e-14	rs7543763	k155	1	a	0.2024	0.695961	0.0362201	yes	yes	1	1	1	1
chr2	151374435	151374435	2.2551e-12	rs6715069	k156	2	A	0.863	0.702163	0.0295152	no	no	0	1	0	1
chr2	151374780	151374780	6.18349e-12	rs3845844	k156	2	A	0.8632	0.980401	0.0110965	no	no	0	1	0	0
chr14	100305146	100305146	1.981e-13	rs12432201	k157	1	t	0.6926	0.405431	0.405431	yes	yes	0	1	0	1
chr11	78312310	78312310	1.787e-10	rs11237450	k159	1	a	0.1657	0.630292	0.00562081	yes	no	1	0	0	0
chr11	78277771	78277771	7.407e-10	rs2510046	k159	1	t	0.8426	0.831207	0.00141309	yes	no	1	0	0	0
chr11	78417001	78417001	2.18e-09	rs881361	k159	1	c	0.8249	0.94199	0.00048282	yes	no	1	1	0	0
chr11	78417289	78417289	2.509e-09	rs881337	k159	1	c	0.1744	0.949625	0.000423565	yes	no	1	1	0	0
chr11	78416868	78416868	3.247e-09	rs869202	k159	1	a	0.8256	0.97055	0.000331307	yes	no	1	1	0	0
chr11	78406829	78406829	4.126e-09	rs7110387	k159	1	a	0.8348	0.978513	0.000262728	yes	no	0	1	0	0
chr20	58888938	58888938	2.688e-10	rs6026579	k160	1	t	0.6645	0.985999	0.00741216	yes	yes	1	0	0	0
chr6	52761774	52761774	8.852e-13	rs2749010	k161	1	t	0.6476	0.371353	0.0220032	yes	yes	1	0	0	0
chr6	52815802	52815802	3.55e-12	rs2894805	k161	1	t	0.5764	0.863438	0.00564222	yes	yes	1	0	0	0
chr6	52788526	52788526	2.122e-11	rs2397105	k161	1	a	0.5672	0.98907	0.000960873	yes	yes	1	0	0	0
chr15	84672152	84672152	2.178e-12	rs7176522	k165	1	c	0.529	0.774113	0.0349861	no	no	1	0	1	0
chr15	84671998	84671998	1.486e-11	rs6496318	k165	1	t	0.4588	0.94862	0.00531917	no	no	1	0	0	0
chr4	10089306	10089306	6.995e-14	rs3775932	k166	1	a	0.4965	0.412136	0.412136	no	yes	1	1	1	1
chr7	66557902	66557902	4.875e-12	rs810400	k167	1	c	0.469	0.49596	0.00818529	yes	yes	1	0	0	0
chr7	66619753	66619753	6.711e-12	rs6460308	k167	1	t	0.5312	0.671286	0.00609698	yes	yes	1	0	0	0
chr7	65872915	65872915	8.122e-12	rs55773927	k167	1	t	0.4457	0.711517	0.00506155	yes	yes	1	1	0	0
chr7	66682114	66682114	1.138e-11	rs2420827	k167	1	a	0.4539	0.783696	0.00360295	yes	yes	1	1	0	0
chr7	65903721	65903721	1.313e-11	rs4467826	k167	1	a	0.446	0.81752	0.00318125	yes	yes	1	0	0	0
chr7	66682191	66682191	1.901e-11	rs3800820	k167	1	t	0.459	0.878008	0.00221144	yes	yes	1	1	0	0
chr7	66682123	66682123	2.039e-11	rs3800823	k167	1	a	0.4578	0.91203	0.00202942	yes	yes	1	1	0	0
chr7	66742705	66742705	2.37e-11	rs2707822	k167	1	c	0.541	0.940216	0.00180101	yes	yes	0	1	0	0
chr7	66740595	66740595	2.425e-11	rs1110414	k167	1	a	0.459	0.943766	0.00175734	yes	yes	1	1	0	0
chr17	17738689	17738689	2.759e-12	rs12938840	k168	1	a	0.5796	0.332134	0.090528	no	no	1	0	1	0
chr17	17446181	17446181	9.999e-12	rs1242485	k168	1	a	0.7454	0.623305	0.0277265	no	no	1	1	1	1
chr17	17448329	17448329	1.854e-10	rs1242484	k168	1	t	0.6931	0.989232	0.00156564	no	no	0	1	0	0
chr19	32930580	32930580	2.52711e-08	rs1865038	k17	2	T	0.1431	0.907363	0.00156266	yes	yes	1	0	0	0
chr19	32691896	32691896	2.18142e-08	rs8108837	k17	2	T	0.3019	0.914922	0.00143803	yes	yes	1	1	0	0
chr19	32868573	32868573	5.2483e-08	rs11084677	k17	2	A	0.0579	0.92969	0.00105158	yes	yes	1	0	0	0
chr19	32692446	32692446	3.32754e-08	rs61732600	k17	2	C	0.3023	0.935632	0.000955891	yes	yes	0	1	0	0
chr19	32870231	32870231	9.69951e-08	rs28521355	k17	2	T	0.0588	0.967454	0.000582945	yes	yes	1	0	0	0
chr2	232856745	232856745	1.02822e-11	rs1947105	k171	1	A	0.643	0.451839	0.0122804	yes	yes	0	1	0	0
chr2	232860773	232860773	1.11975e-11	rs895430	k171	1	A	0.6429	0.581711	0.0112949	yes	yes	1	0	0	0
chr2	232854098	232854098	1.40822e-11	rs2044449	k171	1	A	0.6428	0.799688	0.00903076	yes	yes	0	1	0	0
chr2	232781795	232781795	2.99161e-11	rs283484	k171	1	A	0.6495	0.959846	0.00433487	yes	yes	1	1	0	0
chr2	233388004	233388004	8.34291e-07	rs838718	k171	2	A	0.4818	0.949182	0.00779863	yes	yes	1	0	0	0
chr2	233387798	233387798	1.23719e-06	rs838717	k171	2	A	0.5635	0.954541	0.00535925	yes	yes	1	0	0	0
chr2	233415586	233415586	1.9424e-06	rs838736	k171	2	A	0.5523	0.961793	0.00350014	yes	yes	0	1	0	0
chr2	233566769	233566769	5.6745e-06	rs62192778	k171	2	A	0.1595	0.977897	0.00168845	yes	yes	1	1	0	0
chr2	233350824	233350824	1.45941e-05	rs4663540	k171	2	A	0.3733	0.984166	0.000522869	yes	yes	0	1	0	0
chr22	36160775	36160775	6.437e-11	rs132653	k172	1	t	0.8199	0.953492	0.0249376	yes	yes	1	0	0	0
chr1	55253035	55253035	1.01e-12	rs17413465	k173	1	a	0.1849	0.522627	0.522627	yes	yes	1	0	1	0
chr4	23819105	23819105	2.96663e-10	rs2970851	k174	1	A	0.7458	0.920504	0.0248173	yes	yes	1	0	0	0
chr4	23741827	23741827	1.25957e-09	rs16874072	k174	2	T	0.9513	0.985112	0.061785	yes	yes	1	0	1	0
chr10	62077247	62077247	2.077e-06	rs2393730	k175	1	a	0.4208	0.973353	0.00202149	yes	yes	0	1	0	0
chr10	62077257	62077257	2.926e-06	rs2393729	k175	1	t	0.4208	0.976465	0.00145129	yes	yes	0	1	0	0
chr11	57712392	57712392	9.147e-12	rs1424753	k176	1	t	0.4448	0.624548	0.0148829	no	yes	1	1	0	0
chr11	57680853	57680853	1.054e-11	rs1783980	k176	1	t	0.555	0.762602	0.0131379	no	yes	0	1	0	0
chr11	57761957	57761957	1.8e-11	rs11570176	k176	1	a	0.5727	0.911004	0.00783503	no	yes	1	1	0	0
chr15	82832759	82832759	2.851e-12	rs12905388	k178	1	t	0.3803	0.94757	0.0179687	yes	yes	0	1	0	0
chr15	82832970	82832970	6.406e-12	rs11259952	k178	1	t	0.4776	0.95546	0.00789011	yes	yes	0	1	0	0
chr15	83053307	83053307	1.822e-11	rs17507300	k178	1	a	0.8262	0.967303	0.00356911	yes	yes	0	1	0	0
chr16	79892424	79892424	3.30517e-12	rs11646139	k181	1	A	0.1482	0.953008	0.00666721	yes	yes	1	0	0	0
chr16	79897823	79897823	5.43228e-12	rs4077451	k181	1	A	0.8526	0.980509	0.00417546	yes	yes	1	0	0	0
chr16	79721549	79721549	2.57534e-07	rs4575545	k181	2	A	0.3033	0.971682	0.000992082	yes	yes	1	0	0	0
chr3	12198352	12198352	9.356e-08	rs1663070	k182	1	t	0.755	0.383572	0.0158619	no	no	0	1	0	0
chr3	12800305	12800305	3.913e-07	rs7650482	k182	1	a	0.3542	0.922164	0.00365361	no	no	1	0	0	0
chr3	12287780	12287780	3.201e-06	rs183181489	k182	1	t	0.764	0.98803	0.000600539	no	no	1	0	0	0
chr6	24250283	24250283	6.277e-10	rs9295619	k185	1	t	0.3921	0.303532	0.101221	yes	yes	0	1	0	1
chr6	24273889	24273889	8.046e-08	rs12055879	k185	1	a	0.6599	0.985091	0.000931774	yes	yes	0	1	0	0
chr6	24273645	24273645	9.147e-08	rs12216513	k185	1	a	0.6598	0.987575	0.00081742	yes	yes	0	1	0	0
chr10	80455036	80455036	2.518e-10	rs4934189	k186	1	t	0.5328	0.835481	0.00720734	yes	yes	0	1	0	0
chr10	80429722	80429722	3.823e-10	rs66586255	k186	1	t	0.4512	0.879865	0.00469098	yes	yes	0	1	0	0
chr10	80356846	80356846	5.204e-10	rs4146515	k186	1	a	0.5462	0.921231	0.00351393	yes	yes	1	0	0	0
chr10	80444864	80444864	5.546e-10	rs10887881	k186	1	c	0.4984	0.924506	0.00327447	yes	yes	1	1	0	0
chr10	80443927	80443927	5.685e-10	rs4934170	k186	1	a	0.498	0.930996	0.00321577	yes	yes	1	1	0	0
chr10	80444940	80444940	1.183e-09	rs11202929	k186	1	a	0.5071	0.956033	0.00159738	yes	yes	1	1	0	0
chr10	80444824	80444824	1.908e-09	rs10887880	k186	1	a	0.4981	0.963429	0.00107655	yes	yes	1	1	0	0
chr10	80444944	80444944	2.249e-09	rs11202930	k186	1	c	0.4714	0.971372	0.000914015	yes	yes	1	1	0	0
chr10	80444908	80444908	2.267e-09	rs10887884	k186	1	t	0.4981	0.972264	0.000892426	yes	yes	1	1	0	0
chr10	80442859	80442859	2.243e-09	rs7895779	k186	1	t	0.5256	0.97401	0.000868201	yes	yes	1	1	0	0
chr10	80442863	80442863	2.246e-09	rs7917136	k186	1	t	0.4744	0.975713	0.000849495	yes	yes	1	1	0	0
chr10	80442877	80442877	2.359e-09	rs7917145	k186	1	t	0.4743	0.977362	0.000810423	yes	yes	1	1	0	0
chr10	80443778	80443778	2.611e-09	rs4934168	k186	1	a	0.4766	0.981946	0.000727853	yes	yes	1	1	0	0
chr10	80460758	80460758	3.976e-09	rs7086496	k186	1	t	0.4992	0.987488	0.000489033	yes	yes	1	1	0	0
chr10	80443215	80443215	5.13e-09	rs10788626	k186	1	a	0.4767	0.990175	0.000388711	yes	yes	1	1	0	0
chr2	226426699	226426699	3.69449e-09	rs11686139	k187	1	A	0.8087	0.305657	0.0579863	no	yes	0	1	0	1
chr2	226445309	226445309	3.08623e-08	rs74602746	k187	1	T	0.0306	0.644085	0.0124962	no	yes	1	0	0	0
chr2	226428816	226428816	3.69787e-08	rs78248499	k187	1	T	0.9698	0.744281	0.0105196	no	yes	1	0	0	0
chr2	226427780	226427780	4.28105e-08	rs150181834	k187	1	T	0.0307	0.832489	0.00915681	no	yes	0	1	0	0
chr2	226431469	226431469	5.78583e-08	rs79609806	k187	1	A	0.9698	0.912043	0.00693946	no	yes	0	1	0	0
chr2	226428006	226428006	7.10927e-08	rs116345901	k187	1	T	0.9698	0.973992	0.00571139	no	yes	0	1	0	0
chr4	3041786	3041786	9.623e-06	rs2857850	k188	1	a	0.6181	0.984945	0.000312328	no	no	0	1	0	0
chr4	3480827	3480827	1.477e-05	rs2699433	k188	1	t	0.144	0.987293	0.000277771	no	no	1	1	0	0
chr10	34739856	34739856	5.983e-08	rs10827411	k189	1	t	0.7202	0.978282	0.000608503	yes	yes	1	0	0	0
chr10	34737213	34737213	1.563e-07	rs10450314	k189	1	a	0.2797	0.98281	0.000242844	yes	yes	1	0	0	0
chr10	34744188	34744188	2.807e-07	rs11009912	k189	1	a	0.2602	0.986115	0.000141083	yes	yes	1	1	0	0
chr10	34760930	34760930	3.116e-07	rs7915211	k189	1	t	0.7398	0.988929	0.000127647	yes	yes	0	1	0	0
chr10	34697546	34697546	2.948e-07	rs3002033	k189	1	a	0.6803	0.989564	0.000126596	yes	yes	1	1	0	0
chr17	39553753	39553753	1.12643e-47	rs35335692	k19	1	A	0.2509	0.0910233	0.0126093	no	yes	0	1	0	0
chr17	39358120	39358120	1.53899e-47	rs6503503	k19	1	A	0.2514	0.276979	0.00925579	no	yes	1	0	0	0
chr17	39553529	39553529	7.52229e-47	rs11658219	k19	1	A	0.7484	0.932119	0.00191964	no	yes	0	1	0	0
chr17	38914936	38914936	2.75516e-10	rs2241009	k19	3	T	0.6557	0.617047	0.10634	no	yes	1	0	1	0
chr17	40452336	40452336	4.76987e-06	rs72819623	k19	5	A	0.0329	0.961474	0.000900428	no	yes	1	0	0	0
chr17	40452558	40452558	6.64081e-06	rs72819624	k19	5	A	0.9675	0.962136	0.000661726	no	yes	1	0	0	0
chr17	39730733	39730733	4.09835e-06	rs3809717	k19	5	A	0.3036	0.963809	0.000504939	no	yes	1	0	0	0
chr17	39953001	39953001	1.24401e-05	rs56410675	k19	5	A	0.3845	0.976288	0.000175846	no	yes	1	0	0	0
chr17	39952822	39952822	2.01248e-05	rs28618095	k19	5	T	0.3766	0.981247	0.000106591	no	yes	1	0	0	0
chr17	40345730	40345730	7.653e-05	rs145105278	k19	5	A	0.0239	0.986661	7.33862e-05	no	yes	1	1	0	0
chr17	40318276	40318276	7.86618e-05	rs143494424	k19	5	T	0.0239	0.986877	7.17199e-05	no	yes	1	1	0	0
chr17	40314516	40314516	7.97088e-05	rs137891066	k19	5	A	0.9775	0.98702	7.0843e-05	no	yes	1	0	0	0
chr4	114554497	114554497	1.682e-10	rs35594431	k190	1	t	0.8548	0.975841	0.000517155	no	yes	1	0	0	0
chr4	114561897	114561897	1.774e-10	rs1903365	k190	1	a	0.1457	0.977321	0.000489779	no	yes	1	0	0	0
chr4	114563572	114563572	1.801e-10	rs13110751	k190	1	c	0.8544	0.978772	0.000481863	no	yes	0	1	0	0
chr4	114563873	114563873	1.872e-10	rs13105144	k190	1	a	0.1457	0.981589	0.000466572	no	yes	0	1	0	0
chr4	114563925	114563925	2.097e-10	rs13129837	k190	1	t	0.1456	0.986956	0.000420116	no	yes	0	1	0	0
chr1	155086187	155086187	9.10217e-09	rs17723260	k191	2	A	0.1389	0.935362	0.0525862	yes	yes	0	1	0	1
chr1	155208991	155208991	7.79231e-08	rs760077	k191	2	A	0.3992	0.979188	0.0049108	yes	yes	1	1	0	0
chr1	155051833	155051833	4.50813e-07	rs4845407	k191	2	C	0.8694	0.991046	0.00127114	yes	yes	0	1	0	0
chr5	44809843	44809843	3.167e-10	rs1866406	k192	1	c	0.3782	0.193659	0.00935561	yes	yes	0	1	0	0
chr5	44881402	44881402	5.68e-10	rs13157608	k192	1	t	0.6217	0.666168	0.00537697	yes	yes	1	0	0	0
chr9	137176959	137176959	1.241e-10	9:140071411_A_G	k194	1	a	0.7468	0.554214	0.0320151	yes	yes	0	1	0	1
chr9	137200984	137200984	1.751e-10	9:140095436_C_A	k194	1	a	0.2624	0.706253	0.0231439	yes	yes	1	1	0	0
chr9	137188868	137188868	2.499e-10	9:140083320_G_C	k194	1	c	0.2543	0.88145	0.0162723	yes	yes	1	1	0	0
chr15	67049641	67049641	1.774e-07	rs11638002	k195	1	c	0.0993	0.969262	0.000627222	no	no	0	1	0	0
chr15	67254963	67254963	2.346e-07	rs3743347	k195	1	a	0.2307	0.972285	0.000356996	no	no	1	0	0	0
chr15	67065420	67065420	4.744e-07	rs11633026	k195	1	t	0.0998	0.988795	0.000242375	no	no	1	1	0	0
chr17	67374692	67374692	2.882e-09	rs12939848	k196	1	t	0.3962	0.585982	0.162317	yes	yes	0	1	0	1
chr19	12919466	12919466	5.566e-08	rs8113575	k197	1	a	0.6359	0.981945	0.00112657	no	no	1	1	0	0
chr19	12945743	12945743	6.052e-08	rs2974752	k197	1	a	0.6006	0.984029	0.00103171	no	no	1	1	0	0
chr16	20381010	20381010	3.23373e-40	rs77924615	k2	1	A	0.1984	1	1	yes	yes	1	1	1	1
chr16	20356323	20356323	2.38476e-22	rs12922822	k2	2	T	0.1855	0.441215	0.0871158	yes	yes	1	0	1	0
chr16	20348509	20348509	6.7486e-22	rs13335818	k2	2	T	0.1852	0.910474	0.0313231	yes	yes	1	0	1	0
chr16	20356368	20356368	1.52026e-21	rs12917707	k2	2	T	0.1852	0.994618	0.0140943	yes	yes	1	0	0	0
chr16	20381069	20381069	8.37441e-10	rs73543356	k2	4	A	0.1045	0.311848	0.0444039	yes	yes	1	1	1	1
chr16	20383470	20383470	1.05059e-09	rs75585851	k2	4	T	0.1046	0.587418	0.0356553	yes	yes	1	1	1	1
chr6	100446711	100446711	1.644e-06	rs1857859	k200	1	a	0.2696	0.0956454	0.0956454	yes	no	0	1	0	1
chr6	100456229	100456229	2.667e-06	rs3798488	k200	1	c	0.2694	0.387526	0.060847	yes	no	1	1	1	1
chr6	100505272	100505272	9.524e-05	rs240764	k200	1	a	0.4738	0.879611	0.00183275	yes	no	0	1	0	0
chr6	100663645	100663645	0.0001202	rs151640	k200	1	a	0.4885	0.899029	0.00145626	yes	no	0	1	0	0
chr6	100472779	100472779	0.0006067	rs2157342	k200	1	a	0.5474	0.981494	0.000323214	yes	no	0	1	0	0
chr5	149162843	149162843	1.092e-08	rs4705067	k201	1	c	0.2087	0.185054	0.185054	yes	yes	0	1	0	1
chr5	149154189	149154189	1.322e-08	rs6580598	k201	1	a	0.2084	0.517909	0.154347	yes	yes	1	1	1	1
chr5	149162707	149162707	1.725e-08	rs10044814	k201	1	t	0.2085	0.760052	0.118996	yes	yes	0	1	0	1
chr5	149152420	149152420	4.632e-08	rs10783193	k201	1	a	0.7264	0.979622	0.0422469	yes	yes	1	1	1	1
chr15	57501567	57501567	6.766e-11	rs1994887	k203	1	a	0.2741	0.941474	0.0204242	yes	yes	0	1	0	0
chr15	57522123	57522123	6.365e-10	rs1280364	k203	1	c	0.9784	0.992628	0.00386484	yes	yes	1	0	0	0
chr1	228210109	228210109	1.228e-07	rs72757829	k204	1	a	0.3543	0.941792	0.00283298	no	no	0	1	0	0
chr1	228082567	228082567	1.469e-06	rs822733	k204	1	a	0.3363	0.988493	0.000264005	no	no	1	1	0	0
chr10	74176853	74176853	2.88852e-12	rs10824095	k205	1	T	0.7392	0.267978	0.00670887	yes	yes	1	1	0	0
chr10	74190172	74190172	3.51345e-12	rs7915999	k205	1	T	0.739	0.408789	0.00554102	yes	yes	0	1	0	0
chr10	74266487	74266487	3.90218e-12	rs6480730	k205	1	C	0.7377	0.512883	0.00501107	yes	yes	0	1	0	0
chr10	74224248	74224248	1.11281e-11	rs10824119	k205	1	C	0.2617	0.911097	0.00181199	yes	yes	0	1	0	0
chr10	74224084	74224084	1.53012e-11	rs10762586	k205	1	T	0.2615	0.941973	0.00132872	yes	yes	0	1	0	0
chr10	73785493	73785493	2.90805e-09	rs12256103	k205	2	A	0.2847	0.0691986	0.0691986	yes	yes	1	1	1	1
chr10	73759564	73759564	6.12185e-09	rs10740418	k205	2	T	0.2848	0.561296	0.033672	yes	yes	1	1	1	1
chr10	73886124	73886124	2.09672e-08	rs2633303	k205	2	T	0.7427	0.742781	0.0104009	yes	yes	1	1	0	0
chr10	73889290	73889290	2.70696e-08	rs2675675	k205	2	A	0.7427	0.786475	0.00811101	yes	yes	0	1	0	0
chr10	73886389	73886389	3.12056e-08	rs2688617	k205	2	A	0.2572	0.816396	0.00707549	yes	yes	1	1	0	0
chr10	73913343	73913343	1.66536e-07	rs2227564	k205	2	T	0.2575	0.916777	0.00142473	yes	yes	0	1	0	0
chr10	73909255	73909255	2.63614e-07	rs2459449	k205	2	T	0.276	0.921882	0.00088697	yes	yes	0	1	0	0
chr10	73934174	73934174	4.72906e-07	rs2633322	k205	2	T	0.2669	0.925162	0.000511137	yes	yes	0	1	0	0
chr10	73339209	73339209	1.75887e-06	rs7079748	k205	2	T	0.0622	0.952444	0.000240446	yes	yes	0	1	0	0
chr10	73339166	73339166	1.7913e-06	rs7097514	k205	2	T	0.9392	0.957692	0.000236312	yes	yes	0	1	0	0
chr10	73262312	73262312	1.96239e-06	rs3998306	k205	2	A	0.9392	0.965296	0.000216914	yes	yes	0	1	0	0
chr10	73262546	73262546	3.56994e-06	rs3957119	k205	2	A	0.0622	0.977481	0.000122328	yes	yes	0	1	0	0
chr10	73247517	73247517	3.62476e-06	rs14488	k205	2	A	0.9392	0.977965	0.000120529	yes	yes	1	0	0	0
chr10	73407266	73407266	3.73721e-06	rs58942053	k205	2	A	0.0608	0.978203	0.000118397	yes	yes	0	1	0	0
chr10	73529486	73529486	5.55502e-06	rs78581136	k205	2	C	0.0609	0.985343	8.07705e-05	yes	yes	1	0	0	0
chr10	73909432	73909432	3.97914e-06	rs2227551	k205	2	T	0.7196	0.987271	6.5345e-05	yes	yes	0	1	0	0
chr10	73625224	73625224	9.30457e-06	rs11000723	k205	2	T	0.935	0.989999	5.05281e-05	yes	yes	0	1	0	0
chr4	51960892	51960892	5.927e-09	rs28704930	k206	1	t	0.7179	0.278963	0.0138683	no	no	0	1	0	0
chr4	51964484	51964484	7.273e-09	rs2319747	k206	1	t	0.7177	0.352566	0.0115627	no	no	1	1	0	0
chr4	51964278	51964278	7.588e-09	rs11735705	k206	1	t	0.7091	0.363468	0.0109019	no	no	1	1	0	0
chr4	51845019	51845019	1.252e-08	rs6824707	k206	1	a	0.2917	0.597774	0.0068052	no	no	1	0	0	0
chr4	51844747	51844747	1.331e-08	rs10009426	k206	1	a	0.7083	0.650041	0.00637419	no	no	1	1	0	0
chr1	207867582	207867582	8.543e-10	rs78477968	k209	1	a	0.0605	0.637416	0.0547792	no	no	1	0	1	0
chr1	207797375	207797375	1.067e-08	rs75920586	k209	1	c	0.072	0.914594	0.0045383	no	no	1	1	0	0
chr1	207752016	207752016	1.535e-08	rs41266397	k209	1	c	0.9282	0.971689	0.00319319	no	no	1	1	0	0
chr3	142028798	142028798	5.11473e-42	rs10935453	k21	1	T	0.3277	0.947849	0.0074924	no	yes	1	0	0	0
chr3	141402972	141402972	1.06606e-07	rs2871960	k21	3	A	0.5574	0.587781	0.0242367	no	yes	1	0	0	0
chr3	141426560	141426560	2.63969e-07	rs55715186	k21	3	T	0.898	0.752247	0.015571	no	yes	1	0	0	0
chr3	141426473	141426473	5.33151e-07	rs6762826	k21	3	A	0.9119	0.871526	0.00839828	no	yes	1	0	0	0
chr3	141367241	141367241	1.58272e-06	rs78502471	k21	3	T	0.057	0.94831	0.00346891	no	yes	0	1	0	0
chr3	141426631	141426631	3.67885e-06	rs6802753	k21	3	T	0.9407	0.961106	0.00152242	no	yes	1	0	0	0
chr3	141996701	141996701	5.83757e-06	rs2063453	k21	3	T	0.8447	0.9723	0.000699706	no	yes	1	1	0	0
chr3	141996529	141996529	6.53469e-06	rs2063454	k21	3	T	0.8448	0.97425	0.000628663	no	yes	1	1	0	0
chr3	141337565	141337565	1.39663e-05	rs77630894	k21	3	T	0.0476	0.984326	0.000470549	no	yes	0	1	0	0
chr11	119094769	119094769	1.04634e-09	rs1134734	k210	1	A	0.3635	0.282266	0.126	no	yes	0	1	0	1
chr11	119107422	119107422	3.15856e-09	rs7936752	k210	1	C	0.6286	0.587206	0.0423138	no	yes	1	1	1	1
chr11	119107201	119107201	4.1858e-09	rs2509050	k210	1	A	0.6287	0.734141	0.0322064	no	yes	1	1	1	1
chr11	119094628	119094628	1.70124e-08	rs1064193	k210	1	A	0.3485	0.873928	0.00878956	no	yes	0	1	0	0
chr11	119149167	119149167	2.72603e-08	rs71482170	k210	1	A	0.4124	0.923399	0.00515754	no	yes	1	0	0	0
chr11	119121467	119121467	3.63242e-08	rs583713	k210	1	T	0.4132	0.944833	0.00394197	no	yes	1	1	0	0
chr11	119422002	119422002	3.41155e-07	rs1001205	k210	1	T	0.4037	0.98591	0.000455495	no	yes	1	0	0	0
chr11	119475487	119475487	4.68863e-07	rs535831	k210	1	T	0.6689	0.988539	0.000352517	no	yes	0	1	0	0
chr11	118928115	118928115	7.93771e-08	rs112119822	k210	2	A	0.898	0.423571	0.0595488	no	yes	1	1	1	1
chr11	118928497	118928497	8.0077e-08	rs7101680	k210	2	A	0.1016	0.482628	0.0590572	no	yes	0	1	0	1
chr11	119475268	119475268	2.19004e-06	rs662646	k210	2	T	0.3229	0.917962	0.00169418	no	yes	0	1	0	0
chr11	119417909	119417909	4.58167e-06	rs3138094	k210	2	A	0.6968	0.978666	0.000846356	no	yes	0	1	0	0
chr14	81408765	81408765	1.868e-09	rs17638807	k213	1	t	0.4485	0.214797	0.0585004	no	no	1	1	1	1
chr14	81400336	81400336	6.424e-09	rs3915221	k213	1	a	0.4398	0.685656	0.0173532	no	no	1	1	0	0
chr14	81393650	81393650	7.096e-09	rs4089876	k213	1	a	0.5591	0.751874	0.0156942	no	no	1	1	0	0
chr14	81407033	81407033	1.73e-07	rs2371597	k213	1	c	0.3437	0.982485	0.000754486	no	no	1	1	0	0
chr6	44743143	44743143	2.966e-08	rs1418435	k214	1	a	0.7939	0.89447	0.00706627	no	yes	1	0	0	0
chr1	10599281	10599281	1.72336e-06	rs41274482	k216	1	C	0.9798	0.973657	0.00203533	yes	yes	1	0	0	0
chr1	10651853	10651853	2.78542e-06	rs116052684	k216	1	T	0.979	0.9769	0.00130543	yes	yes	1	0	0	0
chr1	10671568	10671568	2.82843e-06	rs284317	k216	1	A	0.4978	0.990356	0.000541385	yes	yes	0	1	0	0
chr1	10796635	10796635	6.32751e-09	rs11121627	k216	2	T	0.5852	0.62219	0.308504	yes	yes	1	1	1	1
chr16	16013420	16013420	2.368e-05	rs4781721	k217	1	a	0.6095	0.906986	0.00612696	no	no	0	1	0	0
chr16	16022165	16022165	6.136e-05	rs246213	k217	1	c	0.9095	0.938221	0.00396814	no	no	0	1	0	0
chr16	16074483	16074483	0.0002452	rs35620	k217	1	c	0.8386	0.972901	0.000868131	no	no	0	1	0	0
chr16	16013477	16013477	0.002662	rs113774659	k217	1	a	0.0875	0.989534	0.000122871	no	no	0	1	0	0
chr16	1984144	1984144	1.09225e-05	rs566466090	k218	2	C	0.9828	0.987886	0.000760207	yes	no	1	1	0	0
chr3	14178595	14178595	8.788e-08	rs2607775	k219	1	c	0.515	0.264947	0.0236766	no	yes	1	1	0	0
chr3	14147262	14147262	9.029e-08	rs2733534	k219	1	c	0.4836	0.31119	0.0229774	no	yes	1	0	0	0
chr3	14147200	14147200	1.355e-07	rs2733533	k219	1	a	0.4837	0.71844	0.0158068	no	yes	1	0	0	0
chr3	14199790	14199790	7.312e-07	rs2607773	k219	1	a	0.4991	0.892038	0.00314222	no	yes	1	0	0	0
chr3	14144127	14144127	2.204e-06	rs2607770	k219	1	a	0.3929	0.912641	0.00109119	no	yes	0	1	0	0
chr3	14144093	14144093	2.581e-06	rs2607769	k219	1	a	0.3929	0.920594	0.000936686	no	yes	0	1	0	0
chr3	14017509	14017509	4.794e-06	rs6797895	k219	1	t	0.42	0.983006	0.000518586	no	yes	1	0	0	0
chr17	59158956	59158956	8.651e-10	rs8073699	k220	1	a	0.3204	0.0777624	0.0136808	yes	yes	0	1	0	0
chr17	58659424	58659424	1.426e-09	rs372648	k220	1	a	0.665	0.270861	0.0082884	yes	yes	1	0	0	0
chr17	58631725	58631725	7.736e-09	rs369184	k220	1	t	0.3234	0.825256	0.00160554	yes	yes	1	1	0	0
chr17	58659129	58659129	8.903e-09	rs654743	k220	1	t	0.6759	0.849405	0.00140781	yes	yes	0	1	0	0
chr17	58764682	58764682	9.368e-09	rs11657676	k220	1	a	0.6759	0.854888	0.0013619	yes	yes	1	1	0	0
chr17	58631845	58631845	9.952e-09	rs430973	k220	1	t	0.676	0.866626	0.00127539	yes	yes	1	1	0	0
chr17	58692526	58692526	1.138e-08	rs16943176	k220	1	a	0.2238	0.871652	0.00123497	yes	yes	1	1	0	0
chr17	58692618	58692618	1.422e-08	rs12946397	k220	1	t	0.2238	0.918244	0.00100205	yes	yes	1	1	0	0
chr17	58659186	58659186	1.43e-08	rs35797125	k220	1	a	0.2238	0.925175	0.00098305	yes	yes	0	1	0	0
chr17	58631861	58631861	1.936e-08	rs444393	k220	1	a	0.6756	0.960134	0.000685408	yes	yes	1	1	0	0
chr17	58394758	58394758	5.047e-08	rs3785493	k220	1	t	0.7864	0.985995	0.000298314	yes	yes	0	1	0	0
chr20	8334670	8334670	6.314e-10	rs6055748	k221	1	a	0.6914	0.760452	0.760452	yes	yes	1	1	1	1
chr20	14617088	14617088	1.202e-07	rs11699420	k222	1	a	0.7354	0.937492	0.00607757	yes	yes	0	1	0	0
chr20	14712443	14712443	1.744e-06	rs6110404	k222	1	t	0.2723	0.985706	0.000461576	yes	yes	0	1	0	0
chr1	219939086	219939086	9.846e-06	rs1694594	k223	1	t	0.2027	0.308762	0.0248444	no	no	1	1	0	0
chr1	219991671	219991671	2.314e-05	rs1768672	k223	1	a	0.6907	0.444545	0.00970683	no	no	1	1	0	0
chr1	219991820	219991820	2.855e-05	rs1694577	k223	1	t	0.2997	0.556316	0.00797471	no	no	1	1	0	0
chr1	219991512	219991512	0.0001423	rs1622508	k223	1	c	0.1891	0.920297	0.00203167	no	no	1	1	0	0
chr1	219991573	219991573	0.0001504	rs1768671	k223	1	a	0.1892	0.932132	0.00194489	no	no	1	1	0	0
chr1	220090042	220090042	0.003356	rs79281902	k223	1	c	0.9012	0.979118	0.000143871	no	no	1	1	0	0
chr1	220218859	220218859	0.004093	rs80013761	k223	1	c	0.9069	0.982114	0.000120607	no	no	1	0	0	0
chr17	19533874	19533874	6.46558e-40	rs2252281	k23	2	T	0.6107	0.315824	0.315824	no	no	1	0	1	0
chr17	19538723	19538723	1.35384e-38	rs2453583	k23	2	A	0.6115	0.97394	0.0155971	no	no	1	0	0	0
chr15	53634532	53634532	5.64218e-15	rs11858440	k25	1	A	0.5429	0.781975	0.0208811	yes	yes	1	0	0	0
chr15	53710894	53710894	1.16233e-14	rs551225	k25	1	A	0.4798	0.871572	0.0101682	yes	yes	1	0	0	0
chr15	53694282	53694282	5.10729e-07	rs62007983	k25	2	T	0.151	0.929145	0.00289413	yes	yes	1	0	0	0
chr15	53694129	53694129	5.25722e-07	rs62007982	k25	2	T	0.1509	0.931963	0.00281755	yes	yes	1	0	0	0
chr4	76489165	76489165	3.51103e-123	rs4859682	k3	1	A	0.4477	0.988308	0.0234557	yes	yes	1	0	0	0
chr20	34861888	34861888	9.133e-43	rs11698977	k30	1	t	0.3859	0.47056	0.208476	yes	no	1	0	1	0
chr20	34861966	34861966	3.56e-42	rs6120747	k30	1	t	0.6146	0.755753	0.0537989	yes	no	1	0	1	0
chr20	54174247	54174247	4.17553e-17	rs2762943	k31	2	T	0.0805	1	0.366226	yes	yes	1	0	1	0
chr20	54116172	54116172	6.80514e-10	rs209969	k31	3	A	0.8505	0.979648	0.0328569	yes	yes	1	0	1	0
chr1	113042639	113042639	3.54993e-05	rs3889656	k32	2	A	0.6732	0.982729	0.000409616	no	no	0	1	0	0
chr1	113035498	113035498	3.71954e-05	rs11102576	k32	2	T	0.6733	0.984335	0.000388617	no	no	0	1	0	0
chr22	40498459	40498459	9.35936e-21	rs73167096	k33	1	T	0.8993	0.452112	0.0213993	no	no	0	1	0	0
chr22	40453058	40453058	2.94461e-20	rs5995856	k33	1	A	0.1021	0.907579	0.00692333	no	no	1	0	0	0
chr2	15642347	15642347	1.11783e-36	rs807624	k34	1	T	0.3489	0.918626	0.918626	yes	yes	1	0	1	0
chr5	68447208	68447208	9.23777e-36	rs6898254	k35	1	T	0.1084	0.971546	0.0448039	yes	yes	1	0	1	0
chr5	68747126	68747126	2.44291e-25	rs67817891	k35	2	A	0.0926	0.56362	0.0371517	yes	yes	1	0	1	0
chr5	68746359	68746359	2.49895e-25	rs35094860	k35	2	A	0.9059	0.599949	0.0363294	yes	yes	1	1	1	1
chr5	68746623	68746623	2.83805e-25	rs34587017	k35	2	T	0.0926	0.700924	0.0320581	yes	yes	0	1	0	1
chr5	68747008	68747008	2.84043e-25	rs67205506	k35	2	A	0.9059	0.732961	0.0320363	yes	yes	1	0	1	0
chr5	68746769	68746769	2.97292e-25	rs66941667	k35	2	C	0.9059	0.794256	0.0306358	yes	yes	1	0	1	0
chr5	68396052	68396052	1.12915e-08	rs7707989	k35	4	A	0.7987	0.347158	0.347158	yes	yes	1	1	1	1
chr19	37655135	37655135	3.115e-34	rs73035160	k36	1	a	0.3774	0.411228	0.0455317	yes	yes	0	1	0	1
chr19	37967197	37967197	1.405e-33	rs7245962	k36	1	t	0.6401	0.905006	0.0100777	yes	yes	1	0	0	0
chr2	176128855	176128855	1.21381e-35	rs187355703	k37	1	C	0.9724	0.999234	0.999234	yes	yes	0	1	0	1
chr2	176141029	176141029	1.26517e-05	rs1348807	k37	5	T	0.6955	0.990174	0.000248274	yes	yes	0	1	0	0
chr2	176552743	176552743	1.77175e-08	rs1992909	k37	6	A	0.5967	0.225467	0.225467	yes	yes	0	1	0	1
chr2	176535129	176535129	2.08084e-08	rs877740	k37	6	T	0.5959	0.4184	0.192933	yes	yes	1	1	1	1
chr2	176543122	176543122	2.07932e-08	rs1530695	k37	6	A	0.4041	0.607813	0.189413	yes	yes	1	0	1	0
chr2	176553874	176553874	3.2811e-06	rs4894125	k37	6	A	0.507	0.9776	0.00145251	yes	yes	1	1	0	0
chr2	176552754	176552754	5.08758e-06	rs1448538	k37	6	T	0.5282	0.982242	0.000956858	yes	yes	0	1	0	0
chr2	176125811	176125811	3.14611e-05	rs711823	k37	6	C	0.7307	0.989187	0.000187175	yes	yes	0	1	0	0
chr2	176178477	176178477	3.20302e-05	rs6755766	k37	6	T	0.3188	0.989539	0.000173724	yes	yes	1	1	0	0
chr2	176175356	176175356	3.305e-05	rs1124052	k37	6	A	0.3119	0.989709	0.000169318	yes	yes	1	0	0	0
chr7	151716038	151716038	3.19e-140	rs6464165	k4	1	t	0.718	0.998458	0.010047	yes	yes	1	1	0	0
chr7	46714086	46714086	2.299e-32	rs700753	k42	1	c	0.3435	0.720713	0.720713	yes	yes	1	0	1	0
chr7	46713893	46713893	1.731e-31	rs700750	k42	1	a	0.6293	0.822227	0.101513	yes	yes	1	0	1	0
chr7	46713955	46713955	9.549e-31	rs700752	k42	1	c	0.3436	0.999992	0.0186031	yes	yes	1	0	0	0
chr12	3242104	3242104	8.87247e-09	rs73047004	k43	1	T	0.0772	0.674949	0.0534843	no	yes	1	0	1	0
chr12	3241625	3241625	3.67571e-16	rs116646608	k43	2	A	0.0891	0.198932	0.0971365	no	yes	1	0	1	0
chr12	3242077	3242077	4.84453e-16	rs77737253	k43	2	A	0.9104	0.357437	0.0741741	no	yes	1	0	1	0
chr12	3242003	3242003	5.10636e-16	rs74576293	k43	2	T	0.9103	0.427811	0.0703747	no	yes	1	0	1	0
chr12	3241806	3241806	5.20796e-16	rs74528062	k43	2	C	0.0896	0.496847	0.0690358	no	yes	1	0	1	0
chr12	3241854	3241854	5.79406e-16	rs17835600	k43	2	A	0.0896	0.559068	0.0622208	no	yes	1	0	1	0
chr12	3242357	3242357	5.8414e-16	rs7979731	k43	2	T	0.0895	0.620884	0.0618161	no	yes	1	0	1	0
chr12	3241752	3241752	6.70589e-16	rs78338058	k43	2	T	0.9104	0.731517	0.0539377	no	yes	1	0	1	0
chr12	3241629	3241629	8.22997e-16	rs113867519	k43	2	A	0.0891	0.775718	0.0442014	no	yes	1	0	1	0
chr12	3123508	3123508	1.31355e-12	rs34117451	k43	3	T	0.1681	0.0587656	0.0587656	no	yes	0	1	0	1
chr12	3123513	3123513	1.31355e-12	rs35096434	k43	3	T	0.1681	0.117531	0.0587656	no	yes	0	1	0	1
chr12	3123493	3123493	2.019e-12	rs34623502	k43	3	A	0.1681	0.243838	0.0386198	no	yes	0	1	0	1
chr12	3130295	3130295	5.12477e-12	rs34827888	k43	3	A	0.1691	0.894394	0.0156123	no	yes	1	1	0	0
chr12	3117193	3117193	2.42228e-11	rs12816126	k43	3	T	0.1676	0.991874	0.00345339	no	yes	0	1	0	0
chr16	89641595	89641595	3.15485e-32	rs154656	k44	1	A	0.4318	0.464953	0.220066	no	yes	1	1	1	1
chr16	89274760	89274760	1.21332e-11	rs12709112	k44	2	C	0.8882	0.757804	0.340307	no	yes	1	0	1	0
chr16	89262069	89262069	1.51044e-09	rs4785648	k44	2	A	0.1198	0.974706	0.00311817	no	yes	1	0	0	0
chr16	89289545	89289545	1.56127e-08	rs55670800	k44	2	A	0.05	0.988893	0.00042901	no	yes	1	1	0	0
chr16	89505407	89505407	6.01593e-10	rs9922341	k44	3	C	0.4444	0.756865	0.0671451	no	yes	1	1	1	1
chr16	89502467	89502467	9.51219e-10	rs4785574	k44	3	A	0.4425	0.863754	0.0430834	no	yes	0	1	0	1
chr16	51155633	51155633	6.71593e-10	rs12925759	k46	3	A	0.211	0.966762	0.00565028	yes	yes	0	1	0	0
chr16	51152566	51152566	7.83451e-10	rs4785505	k46	3	A	0.6048	0.975272	0.00411068	yes	yes	1	1	0	0
chr3	38479934	38479934	1.224e-29	rs4407366	k47	1	t	0.6119	0.647334	0.0168424	no	no	1	1	0	0
chr3	38471288	38471288	2.141e-28	rs2276541	k47	1	a	0.6094	0.973858	0.000986701	no	no	1	0	0	0
chr10	68203197	68203197	5.22663e-20	rs10998018	k49	1	A	0.4973	0.617857	0.0316528	no	yes	0	1	0	1
chr5	177303677	177303677	1.73924e-07	rs9313754	k5	3	C	0.8444	0.863345	0.0389333	yes	yes	1	1	1	1
chr5	177390582	177390582	3.96726e-06	rs55785724	k5	3	A	0.6792	0.982387	0.00149338	yes	yes	1	1	0	0
chr5	177390635	177390635	8.19979e-06	rs6420094	k5	3	A	0.6783	0.990489	0.000749751	yes	yes	1	1	0	0
chr11	2773162	2773162	2.00865e-09	rs233438	k50	1	A	0.8141	0.52595	0.071851	yes	yes	0	1	0	1
chr11	2769506	2769506	2.32951e-09	rs163158	k50	1	A	0.1574	0.661506	0.0660472	yes	yes	0	1	0	1
chr11	2773118	2773118	9.17087e-09	rs163152	k50	1	T	0.8195	0.936839	0.0166386	yes	yes	0	1	0	0
chr11	2760440	2760440	1.62048e-08	rs463535	k50	1	T	0.1784	0.961601	0.00968139	yes	yes	1	1	0	0
chr11	2928631	2928631	9.16636e-11	rs1056819	k50	2	T	0.1904	0.551075	0.551075	yes	yes	0	1	0	1
chr11	2777574	2777574	2.34916e-08	rs81205	k50	3	A	0.5375	0.232155	0.232155	yes	yes	0	1	0	1
chr21	15421571	15421571	5.6354e-15	rs6517422	k51	2	A	0.2954	0.389199	0.0236068	yes	yes	1	0	0	0
chr21	15422042	15422042	6.66443e-15	rs2242828	k51	2	A	0.2955	0.494039	0.0200214	yes	yes	0	1	0	0
chr21	15421720	15421720	7.45099e-15	rs6517423	k51	2	A	0.2955	0.58594	0.017958	yes	yes	1	1	0	0
chr3	185586230	185586230	4.79873e-20	rs17523471	k53	1	T	0.6582	0.906674	0.00536016	yes	no	1	1	0	0
chr1	15526781	15526781	2.55643e-25	rs12741552	k55	1	T	0.6883	0.142273	0.0264965	yes	yes	1	1	1	1
chr1	15584854	15584854	2.86242e-25	rs3737705	k55	1	A	0.3165	0.317294	0.0239033	yes	yes	1	0	0	0
chr1	15585235	15585235	2.92474e-25	rs6690219	k55	1	T	0.6883	0.412195	0.0234091	yes	yes	1	0	0	0
chr1	15542789	15542789	3.70646e-25	rs12736181	k55	1	A	0.3167	0.815828	0.0183597	yes	yes	1	0	0	0
chr1	16227075	16227075	5.29759e-11	rs11578280	k55	2	A	0.6718	0.101874	0.0503754	yes	yes	1	0	1	0
chr1	16244344	16244344	5.11721e-10	rs6683278	k55	2	T	0.6242	0.724685	0.00533296	yes	yes	1	0	0	0
chr10	92114732	92114732	1.02805e-10	rs1935865	k58	2	T	0.6688	0.921089	0.0019425	yes	yes	1	0	0	0
chr10	92114352	92114352	1.79711e-10	rs766398	k58	2	A	0.6684	0.94511	0.00112945	yes	yes	1	0	0	0
chr10	92114578	92114578	2.12116e-10	rs766399	k58	2	T	0.6684	0.958726	0.000958762	yes	yes	1	0	0	0
chr4	102878375	102878375	8.987e-28	rs2850599	k59	1	t	0.4821	0.272437	0.0171729	yes	yes	1	0	0	0
chr4	102890220	102890220	1.376e-27	rs223310	k59	1	a	0.5162	0.370209	0.0109713	yes	yes	0	1	0	0
chr4	102869029	102869029	1.921e-27	rs223332	k59	1	t	0.4838	0.488723	0.0080112	yes	yes	1	1	0	0
chr4	102878412	102878412	2.111e-27	rs223323	k59	1	a	0.4838	0.511539	0.00725672	yes	yes	1	0	0	0
chr4	102828287	102828287	3.606e-27	rs223388	k59	1	a	0.4819	0.674112	0.00439844	yes	yes	1	1	0	0
chr4	102829159	102829159	3.477e-27	rs223385	k59	1	a	0.482	0.678497	0.00438558	yes	yes	0	1	0	0
chr4	102829111	102829111	4.254e-27	rs223386	k59	1	t	0.482	0.710797	0.0036041	yes	yes	0	1	0	0
chr4	102828359	102828359	7.928e-27	rs223387	k59	1	c	0.5177	0.825861	0.00198692	yes	yes	1	1	0	0
chr4	102780661	102780661	1.156e-26	rs223462	k59	1	t	0.4834	0.908311	0.00143378	yes	yes	0	1	0	0
chr4	102780603	102780603	1.107e-26	rs223464	k59	1	a	0.4825	0.909742	0.00143023	yes	yes	0	1	0	0
chr4	102780620	102780620	1.137e-26	rs223463	k59	1	t	0.5166	0.9181	0.00137497	yes	yes	0	1	0	0
chr4	103009354	103009354	2.962e-26	rs4698874	k59	1	t	0.5173	0.983252	0.000549489	yes	yes	1	0	0	0
chr2	210198628	210198628	4.15606e-07	rs263681	k6	2	C	0.0979	0.635396	0.00491894	no	no	0	1	0	0
chr2	210170701	210170701	7.06588e-07	rs35125543	k6	2	T	0.0976	0.807143	0.00296694	no	no	0	1	0	0
chr2	210189875	210189875	7.32693e-07	rs1155845	k6	2	T	0.9027	0.821533	0.00284936	no	no	1	0	0	0
chr2	148020703	148020703	6.579e-26	rs897172	k60	1	a	0.6868	0.557797	0.00767054	yes	yes	1	1	0	0
chr2	147844091	147844091	1.951e-25	rs12053113	k60	1	t	0.6869	0.966981	0.00257421	yes	yes	1	1	0	0
chr3	186717288	186717288	1.777e-22	rs3806689	k61	1	a	0.6823	0.826065	0.0330702	yes	yes	1	0	1	0
chr3	186717030	186717030	1.96e-22	rs3806688	k61	1	t	0.6823	0.886897	0.0299064	yes	yes	1	0	1	0
chr22	42716469	42716469	2.55183e-20	rs738526	k62	1	T	0.6804	0.736995	0.0663768	yes	yes	1	1	1	1
chr22	42720979	42720979	6.76287e-20	rs28910285	k62	1	T	0.3197	0.865708	0.0256279	yes	yes	1	0	1	0
chr22	41570145	41570145	1.55231e-05	rs146674911	k62	3	A	0.0156	0.978477	0.000576066	yes	yes	1	0	0	0
chr22	42841633	42841633	4.31389e-05	rs738534	k62	3	A	0.4496	0.987277	8.24545e-05	yes	yes	0	1	0	0
chr22	42844800	42844800	4.90846e-05	rs4822203	k62	3	T	0.5505	0.988286	7.29202e-05	yes	yes	1	1	0	0
chr22	42844997	42844997	4.93125e-05	rs4820489	k62	3	C	0.5505	0.988432	7.26553e-05	yes	yes	1	1	0	0
chr1	23368782	23368782	5.565e-16	rs680386	k65	1	t	0.1856	0.985614	0.00109564	no	no	1	1	0	0
chr2	169362773	169362773	6.36249e-17	rs16856847	k67	2	A	0.988	0.625462	0.185396	yes	yes	1	0	1	0
chr7	129100706	129100706	6.67578e-15	rs6467228	k69	1	A	0.4561	0.32867	0.16125	yes	yes	1	1	1	1
chr7	129100859	129100859	6.88395e-15	rs6467229	k69	1	T	0.5439	0.485143	0.156473	yes	yes	1	1	1	1
chr7	129102897	129102897	1.95792e-14	rs1077481	k69	1	T	0.5446	0.666106	0.056122	yes	yes	1	1	1	1
chr7	129102595	129102595	2.58194e-14	rs10254963	k69	1	T	0.4553	0.761826	0.0427915	yes	yes	1	1	1	1
chr7	129098971	129098971	3.34334e-14	rs34673027	k69	1	A	0.4541	0.795316	0.0334899	yes	yes	0	1	0	1
chr7	129098887	129098887	3.52435e-14	rs7799991	k69	1	A	0.5446	0.827148	0.0318321	yes	yes	0	1	0	1
chr7	129098896	129098896	3.64612e-14	rs7799998	k69	1	A	0.5446	0.857948	0.0308007	yes	yes	0	1	0	1
chr7	129098910	129098910	4.9348e-14	rs13222837	k69	1	A	0.5446	0.938049	0.0228831	yes	yes	0	1	0	0
chr7	128939148	128939148	1.12227e-11	rs3807307	k69	2	T	0.5422	0.99162	0.0102061	yes	yes	1	0	0	0
chr17	61379228	61379228	1.29443e-36	rs9895661	k7	1	T	0.8247	0.993422	0.17137	no	yes	1	0	1	0
chr17	61161898	61161898	3.01955e-61	rs9905761	k7	2	T	0.1878	0.569148	0.569148	no	yes	1	0	1	0
chr17	61161788	61161788	4.38088e-59	rs2378816	k7	2	A	0.8069	0.982216	0.00408093	no	yes	1	0	0	0
chr17	61161860	61161860	4.64034e-59	rs11868441	k7	2	A	0.1932	0.986072	0.00385613	no	yes	1	0	0	0
chr17	61409438	61409438	6.21029e-25	rs729781	k7	3	A	0.2675	0.345335	0.128379	no	yes	1	0	1	0
chr17	61407472	61407472	7.36384e-25	rs8073698	k7	3	T	0.7322	0.453884	0.10855	no	yes	1	0	1	0
chr17	61407656	61407656	1.09077e-24	rs8074151	k7	3	A	0.7322	0.716632	0.073632	no	yes	1	0	1	0
chr2	121228183	121228183	2.28e-25	rs34773350	k70	1	t	0.1397	0.576957	0.115618	yes	yes	1	1	1	1
chr2	121238062	121238062	9.436e-25	rs11689538	k70	1	c	0.1394	0.933109	0.0291428	yes	yes	0	1	0	1
chr2	121238301	121238301	5.18e-24	rs11678466	k70	1	a	0.8597	0.990476	0.00536305	yes	yes	0	1	0	0
chr8	8702073	8702073	2.33354e-09	rs11783735	k71	2	A	0.2461	0.597331	0.00761236	no	no	1	1	0	0
chr8	8701891	8701891	2.85835e-09	rs11776987	k71	2	C	0.7539	0.644695	0.00624844	no	no	1	1	0	0
chr8	8701884	8701884	3.23758e-09	rs11783670	k71	2	A	0.2461	0.685676	0.00553748	no	no	1	1	0	0
chr8	8701745	8701745	3.52653e-09	rs35382339	k71	2	A	0.2461	0.722303	0.00509429	no	no	1	1	0	0
chr8	8701784	8701784	4.05627e-09	rs34762800	k71	2	A	0.246	0.774687	0.00448748	no	no	1	1	0	0
chr8	8723528	8723528	2.92522e-08	rs11777719	k71	2	A	0.7131	0.974828	0.000637371	no	no	1	1	0	0
chr8	8701998	8701998	7.16098e-08	rs34491508	k71	2	A	0.7547	0.986454	0.0002977	no	no	1	1	0	0
chr8	8310872	8310872	8.17824e-08	rs2945236	k71	2	A	0.5253	0.989128	0.000213944	no	no	1	1	0	0
chr6	31665719	31665719	2.09411e-10	rs3117579	k73	1	T	0.1886	0.645555	0.0162207	yes	yes	0	1	0	0
chr6	31664357	31664357	3.91726e-10	rs3130618	k73	1	A	0.1887	0.817877	0.00885599	yes	yes	0	1	0	0
chr6	31729610	31729610	2.54472e-09	rs805305	k73	1	C	0.6426	0.953468	0.00120949	yes	yes	0	1	0	0
chr6	31730311	31730311	3.18268e-09	rs805304	k73	1	T	0.6425	0.964177	0.000973292	yes	yes	0	1	0	0
chr6	31729781	31729781	3.52703e-09	rs707916	k73	1	A	0.3578	0.966909	0.000880185	yes	yes	0	1	0	0
chr6	30769814	30769814	1.41975e-08	rs3095337	k73	1	C	0.1939	0.983306	0.000278631	yes	yes	0	1	0	0
chr6	30828768	30828768	1.64973e-08	rs1264350	k73	1	T	0.8465	0.9841	0.000259712	yes	yes	0	1	0	0
chr6	30726039	30726039	2.02928e-08	rs3095329	k73	1	A	0.7852	0.986297	0.000190684	yes	yes	0	1	0	0
chr6	25833494	25833494	3.1991e-19	rs62394273	k73	2	T	0.1184	0.355425	0.0693838	yes	yes	1	0	0	0
chr6	25830848	25830848	3.2499e-19	rs62394272	k73	2	A	0.8816	0.423737	0.0683123	yes	yes	1	0	0	0
chr6	34224259	34224259	3.51518e-18	rs114760566	k73	3	A	0.0429	0.988963	0.00322129	yes	yes	1	1	0	0
chr6	33747004	33747004	7.93967e-11	rs530614	k73	5	A	0.1937	0.236079	0.0492256	yes	yes	1	0	0	0
chr6	33700593	33700593	3.75672e-10	rs942643	k73	5	A	0.5528	0.67724	0.00839851	yes	yes	0	1	0	0
chr6	33732105	33732105	6.17296e-10	rs4713670	k73	5	T	0.5606	0.842766	0.00522566	yes	yes	1	0	0	0
chr6	33732122	33732122	7.47718e-10	rs4713671	k73	5	T	0.5607	0.861181	0.0043477	yes	yes	1	0	0	0
chr6	33711819	33711819	9.37277e-10	rs2274458	k73	5	A	0.5539	0.888212	0.00357223	yes	yes	1	1	0	0
chr6	33759213	33759213	2.54826e-09	rs9461907	k73	5	A	0.2025	0.935532	0.00158717	yes	yes	1	1	0	0
chr6	33314851	33314851	2.15461e-09	rs1061783	k73	5	T	0.5118	0.938628	0.00154166	yes	yes	0	1	0	0
chr6	33289409	33289409	3.19255e-09	rs464865	k73	5	A	0.4702	0.957683	0.00105519	yes	yes	0	1	0	0
chr6	33289207	33289207	4.43742e-09	rs463260	k73	5	T	0.5296	0.973053	0.00076593	yes	yes	0	1	0	0
chr6	33705021	33705021	7.93143e-09	rs9366828	k73	5	A	0.4394	0.988401	0.000469399	yes	yes	0	1	0	0
chr6	34425871	34425871	5.44575e-07	rs4713779	k73	6	T	0.9565	0.970531	0.000709275	yes	yes	0	1	0	0
chr6	34392076	34392076	5.98414e-07	rs58648597	k73	6	T	0.0424	0.97183	0.000644188	yes	yes	0	1	0	0
chr6	26123274	26123274	1.08814e-06	rs115740542	k73	6	T	0.9278	0.984233	0.000314636	yes	yes	1	1	0	0
chr6	26240369	26240369	1.27049e-07	rs73736567	k73	7	A	0.0207	0.852452	0.0028698	yes	yes	1	0	0	0
chr6	26033615	26033615	1.06198e-07	rs76616834	k73	7	T	0.0085	0.857496	0.00250166	yes	yes	1	1	0	0
chr6	26124015	26124015	1.15283e-07	rs198820	k73	7	A	0.3753	0.893965	0.00146991	yes	yes	1	1	0	0
chr6	26055162	26055162	2.26909e-07	rs114170326	k73	7	A	0.0087	0.91193	0.00129508	yes	yes	0	1	0	0
chr6	26104220	26104220	1.69537e-07	rs198852	k73	7	A	0.6254	0.923476	0.00101313	yes	yes	1	1	0	0
chr6	26125483	26125483	1.92118e-07	rs198818	k73	7	A	0.6246	0.928269	0.000896042	yes	yes	0	1	0	0
chr6	26056249	26056249	4.09461e-07	rs41266787	k73	7	A	0.9909	0.941641	0.000772872	yes	yes	1	1	0	0
chr6	26327725	26327725	3.06557e-07	rs6939048	k73	7	A	0.6285	0.953144	0.000574836	yes	yes	0	1	0	0
chr6	26032718	26032718	4.30627e-07	rs143703334	k73	7	A	0.0059	0.961313	0.000456	yes	yes	0	1	0	0
chr6	26189193	26189193	9.80994e-07	rs114555315	k73	7	A	0.0179	0.963969	0.00043068	yes	yes	1	1	0	0
chr6	26285455	26285455	4.28148e-07	rs2393593	k73	7	T	0.4595	0.965611	0.00040464	yes	yes	1	1	0	0
chr6	26285639	26285639	4.31269e-07	rs3999544	k73	7	T	0.5405	0.966013	0.000402138	yes	yes	1	1	0	0
chr6	26313077	26313077	4.43543e-07	rs4145910	k73	7	T	0.3716	0.966415	0.000401241	yes	yes	0	1	0	0
chr6	26003172	26003172	1.10017e-06	rs114190760	k73	7	A	0.0087	0.973064	0.000303386	yes	yes	1	0	0	0
chr6	25992844	25992844	1.75981e-06	rs116448232	k73	7	A	0.9911	0.981055	0.000202182	yes	yes	1	1	0	0
chr6	33323048	33323048	1.05507e-06	rs2073525	k73	7	A	0.4779	0.983621	0.000170589	yes	yes	0	1	0	0
chr6	30695789	30695789	2.53067e-06	rs141202333	k73	7	A	0.0152	0.983961	0.000169937	yes	yes	0	1	0	0
chr6	33314225	33314225	1.48073e-06	rs3106189	k73	7	T	0.5042	0.988371	0.000122924	yes	yes	0	1	0	0
chr6	33312852	33312852	1.79163e-06	rs3106190	k73	7	C	0.4957	0.989941	0.000102354	yes	yes	0	1	0	0
chr6	34426068	34426068	9.4362e-06	rs9469779	k73	8	A	0.8064	0.891582	0.00037705	yes	yes	1	1	0	0
chr6	34392019	34392019	1.11063e-05	rs9461981	k73	8	A	0.8067	0.897075	0.000322744	yes	yes	0	1	0	0
chr6	26384400	26384400	3.63419e-05	rs3885849	k73	8	A	0.0125	0.907622	0.000232251	yes	yes	0	1	0	0
chr6	26331265	26331265	5.61747e-05	rs11962660	k73	8	A	0.9846	0.920792	0.000158598	yes	yes	0	1	0	0
chr6	34887971	34887971	3.28779e-05	rs1051115	k73	8	C	0.1118	0.925571	0.000140949	yes	yes	1	1	0	0
chr6	29753044	29753044	8.26517e-05	rs17184911	k73	8	C	0.9925	0.941509	9.46679e-05	yes	yes	0	1	0	0
chr6	34792385	34792385	3.53176e-05	rs7769961	k73	8	C	0.3287	0.943277	9.14233e-05	yes	yes	0	1	0	0
chr6	28789854	28789854	0.000104504	rs80184985	k73	8	A	0.9822	0.944891	8.85514e-05	yes	yes	0	1	0	0
chr6	29993239	29993239	0.000104134	rs113699636	k73	8	A	0.0062	0.948537	8.11693e-05	yes	yes	0	1	0	0
chr6	33272092	33272092	7.22378e-05	rs17215231	k73	8	T	0.0742	0.948618	8.08669e-05	yes	yes	0	1	0	0
chr6	31060130	31060130	0.000120873	rs138167616	k73	8	T	0.0125	0.949181	7.97525e-05	yes	yes	0	1	0	0
chr6	27097101	27097101	0.000118058	rs73739549	k73	8	T	0.9917	0.950836	7.75757e-05	yes	yes	0	1	0	0
chr6	31665031	31665031	0.000128705	rs62395807	k73	8	A	0.0141	0.95168	7.58338e-05	yes	yes	0	1	0	0
chr6	34792177	34792177	4.54426e-05	rs6457791	k73	8	A	0.6709	0.953151	7.22431e-05	yes	yes	1	1	0	0
chr6	31272222	31272222	0.000102035	rs6457358	k73	8	A	0.9367	0.958154	6.1761e-05	yes	yes	0	1	0	0
chr6	34596181	34596181	6.55727e-05	rs205260	k73	8	C	0.6715	0.960584	5.46557e-05	yes	yes	1	0	0	0
chr6	31542257	31542257	0.000192827	rs62395766	k73	8	A	0.9866	0.961545	5.25461e-05	yes	yes	0	1	0	0
chr6	29650255	29650255	0.000174537	rs6920297	k73	8	A	0.0064	0.962473	5.09363e-05	yes	yes	0	1	0	0
chr6	30687579	30687579	0.000294902	rs191563425	k73	8	T	0.9845	0.970788	3.66799e-05	yes	yes	0	1	0	0
chr6	31159260	31159260	0.000232819	rs17190769	k73	8	T	0.041	0.972155	3.38086e-05	yes	yes	0	1	0	0
chr6	26125596	26125596	0.000142609	rs6931863	k73	8	A	0.1634	0.973191	3.08703e-05	yes	yes	0	1	0	0
chr6	34609999	34609999	0.000115781	rs2814978	k73	8	A	0.3287	0.973586	2.99859e-05	yes	yes	1	1	0	0
chr6	26125598	26125598	0.000149152	rs6931542	k73	8	A	0.1634	0.973675	2.96433e-05	yes	yes	0	1	0	0
chr6	27230605	27230605	0.000344657	rs149810000	k73	8	A	0.9936	0.975379	2.51433e-05	yes	yes	0	1	0	0
chr6	34246893	34246893	0.000379054	rs4711389	k73	8	A	0.9729	0.975479	2.49881e-05	yes	yes	0	1	0	0
chr6	26122980	26122980	0.000200668	rs77919048	k73	8	T	0.8359	0.97664	2.23131e-05	yes	yes	1	1	0	0
chr6	31546839	31546839	0.000513601	rs62395767	k73	8	A	0.9864	0.976816	2.19538e-05	yes	yes	0	1	0	0
chr6	34295966	34295966	0.000159796	rs10947494	k73	8	A	0.476	0.977266	2.09605e-05	yes	yes	0	1	0	0
chr6	26537502	26537502	0.00058392	rs78665123	k73	8	T	0.0061	0.977816	1.96358e-05	yes	yes	1	1	0	0
chr6	31271999	31271999	0.000219557	rs2074493	k73	8	A	0.7526	0.978287	1.82652e-05	yes	yes	0	1	0	0
chr6	34596110	34596110	0.000307528	rs205261	k73	8	C	0.1076	0.978432	1.79831e-05	yes	yes	1	0	0	0
chr6	34596289	34596289	0.000224239	rs205259	k73	8	A	0.6705	0.979605	1.61106e-05	yes	yes	1	0	0	0
chr6	30742457	30742457	0.00064388	rs28600807	k73	8	A	0.032	0.980406	1.46933e-05	yes	yes	0	1	0	0
chr6	31037936	31037936	0.000650838	rs9262556	k73	8	T	0.0327	0.980552	1.45623e-05	yes	yes	0	1	0	0
chr6	34224197	34224197	0.000703203	rs117525671	k73	8	T	0.025	0.980696	1.42983e-05	yes	yes	1	1	0	0
chr6	30742494	30742494	0.000686662	rs116771824	k73	8	A	0.9693	0.98102	1.38442e-05	yes	yes	0	1	0	0
chr6	31494003	31494003	0.000933968	rs62395345	k73	8	A	0.9868	0.981556	1.30253e-05	yes	yes	0	1	0	0
chr6	30742358	30742358	0.000744055	rs10947089	k73	8	A	0.9692	0.98162	1.29131e-05	yes	yes	0	1	0	0
chr6	30742855	30742855	0.000745003	rs114965076	k73	8	T	0.0324	0.981736	1.28565e-05	yes	yes	0	1	0	0
chr6	26305415	26305415	0.00103219	rs7745232	k73	8	A	0.9918	0.981914	1.26074e-05	yes	yes	0	1	0	0
chr6	33673097	33673097	0.000357639	rs12212284	k73	8	A	0.2175	0.982441	1.19126e-05	yes	yes	1	1	0	0
chr6	27872271	27872271	0.00112125	rs113997190	k73	8	T	0.9922	0.982547	1.17308e-05	yes	yes	0	1	0	0
chr6	26195677	26195677	0.00112263	rs806791	k73	8	T	0.0131	0.982687	1.15569e-05	yes	yes	1	1	0	0
chr6	27873637	27873637	0.00117271	rs111883623	k73	8	C	0.9922	0.98287	1.13092e-05	yes	yes	0	1	0	0
chr6	26022164	26022164	0.000634015	rs75397441	k73	8	T	0.0982	0.983652	1.01508e-05	yes	yes	0	1	0	0
chr6	28167466	28167466	0.00132865	rs80168551	k73	8	A	0.0059	0.983863	9.92882e-06	yes	yes	0	1	0	0
chr6	27672475	27672475	0.00118	rs142019185	k73	8	A	0.0049	0.983971	9.75821e-06	yes	yes	0	1	0	0
chr6	28252080	28252080	0.00150149	rs76574137	k73	8	A	0.006	0.984534	9.03878e-06	yes	yes	1	1	0	0
chr6	30722488	30722488	0.00112831	rs75955575	k73	8	A	0.9692	0.984624	8.82985e-06	yes	yes	0	1	0	0
chr6	28252396	28252396	0.00155041	rs79880617	k73	8	A	0.006	0.984632	8.80645e-06	yes	yes	1	1	0	0
chr6	28924079	28924079	0.00156433	rs6934771	k73	8	T	0.0128	0.984702	8.7035e-06	yes	yes	0	1	0	0
chr6	26327586	26327586	0.00048432	rs6917995	k73	8	T	0.5113	0.985943	7.38054e-06	yes	yes	0	1	0	0
chr6	31660956	31660956	0.000495218	rs805262	k73	8	T	0.4697	0.985988	7.31936e-06	yes	yes	0	1	0	0
chr6	30076002	30076002	0.00108212	rs3807032	k73	8	C	0.9202	0.986703	6.46002e-06	yes	yes	0	1	0	0
chr6	31004598	31004598	0.00236593	rs73727152	k73	8	A	0.0098	0.986806	6.3812e-06	yes	yes	0	1	0	0
chr6	33633705	33633705	0.000657816	rs9461894	k73	8	T	0.3077	0.987064	6.17852e-06	yes	yes	1	0	0	0
chr6	27505599	27505599	0.00253276	rs78108913	k73	8	T	0.0075	0.987253	6.04169e-06	yes	yes	0	1	0	0
chr6	28953347	28953347	0.00242294	rs9767253	k73	8	C	0.0128	0.987313	6.00223e-06	yes	yes	0	1	0	0
chr6	28866510	28866510	0.00237375	rs11759525	k73	8	A	0.0141	0.987414	5.90691e-06	yes	yes	0	1	0	0
chr6	31796165	31796165	0.00156018	rs534892	k73	8	C	0.0418	0.987426	5.8781e-06	yes	yes	0	1	0	0
chr6	28951221	28951221	0.00249991	rs79578426	k73	8	T	0.0128	0.987432	5.84341e-06	yes	yes	0	1	0	0
chr6	27495946	27495946	0.00265954	rs58945181	k73	8	T	0.992	0.987461	5.81593e-06	yes	yes	0	1	0	0
chr6	31740370	31740370	0.000964718	rs409558	k73	8	T	0.8474	0.987924	5.4722e-06	yes	yes	0	1	0	0
chr6	34792104	34792104	0.00082074	rs13215181	k73	8	A	0.6925	0.98794	5.45844e-06	yes	yes	1	1	0	0
chr6	28589368	28589368	0.00166312	rs116739834	k73	8	T	0.0512	0.988043	5.36813e-06	yes	yes	0	1	0	0
chr6	27237692	27237692	0.00296286	rs116471051	k73	8	T	0.9925	0.988129	5.31224e-06	yes	yes	0	1	0	0
chr6	28838852	28838852	0.0029369	rs73407237	k73	8	T	0.9852	0.988373	5.10664e-06	yes	yes	0	1	0	0
chr6	33080577	33080577	0.00158269	rs7765682	k73	8	A	0.9406	0.988383	5.09108e-06	yes	yes	0	1	0	0
chr6	34889249	34889249	0.0018592	rs74723861	k73	8	C	0.9535	0.988419	5.06688e-06	yes	yes	1	1	0	0
chr6	31008146	31008146	0.00321994	rs117171207	k73	8	T	0.0115	0.988742	4.8598e-06	yes	yes	0	1	0	0
chr6	30496430	30496430	0.00323911	rs146894800	k73	8	C	0.99	0.988872	4.80172e-06	yes	yes	0	1	0	0
chr6	34709794	34709794	0.00281921	rs146703431	k73	8	C	0.0162	0.988886	4.79442e-06	yes	yes	1	0	0	0
chr6	33312728	33312728	0.000907118	rs3106191	k73	8	A	0.3072	0.989263	4.49245e-06	yes	yes	0	1	0	0
chr6	31734933	31734933	0.00173161	rs400547	k73	8	T	0.0642	0.989276	4.4879e-06	yes	yes	0	1	0	0
chr6	33323095	33323095	0.00090956	rs3106194	k73	8	A	0.3072	0.989285	4.47989e-06	yes	yes	0	1	0	0
chr6	26285332	26285332	0.000835119	rs2393592	k73	8	A	0.4728	0.989326	4.45284e-06	yes	yes	0	1	0	0
chr6	34757603	34757603	0.0031236	rs45468793	k73	8	T	0.0162	0.989401	4.38019e-06	yes	yes	1	1	0	0
chr6	28896393	28896393	0.00362324	rs74672902	k73	8	T	0.9853	0.989513	4.29513e-06	yes	yes	0	1	0	0
chr6	35162644	35162644	0.00114289	rs9394277	k73	8	A	0.8184	0.989552	4.27497e-06	yes	yes	1	0	0	0
chr6	31153125	31153125	0.00364073	rs28652698	k73	8	T	0.0051	0.989628	4.22716e-06	yes	yes	0	1	0	0
chr6	31246063	31246063	0.00372011	rs139416387	k73	8	T	0.0174	0.989867	4.03845e-06	yes	yes	0	1	0	0
chr6	34757371	34757371	0.00199629	rs60410089	k73	8	A	0.9402	0.989908	4.0064e-06	yes	yes	1	1	0	0
chr6	31272351	31272351	0.000529113	rs2074489	k73	9	T	0.2393	0.989283	6.22415e-06	yes	yes	0	1	0	0
chr6	41712928	41712928	8.447e-21	rs9471632	k74	1	t	0.5344	0.933053	0.150806	yes	yes	1	1	1	1
chr18	61664796	61664796	1.152e-25	rs17068778	k75	1	a	0.2105	0.798337	0.0310613	no	no	1	0	1	0
chr18	61687383	61687383	2.262e-25	rs4940525	k75	1	t	0.2201	0.924979	0.0156569	no	no	1	0	0	0
chr7	155869692	155869692	2.95669e-14	rs28691751	k76	2	A	0.1209	0.983292	0.00473895	yes	yes	1	0	0	0
chr7	155869688	155869688	3.26809e-14	rs28380269	k76	2	T	0.8791	0.98759	0.00429725	yes	yes	1	0	0	0
chr7	156334749	156334749	6.03489e-13	rs10241238	k76	4	A	0.1265	0.889915	0.022014	yes	yes	0	1	0	0
chr7	156610725	156610725	2.49672e-11	rs2530738	k76	5	A	0.7865	0.955949	0.0293083	yes	yes	1	0	1	0
chr7	155803897	155803897	3.97176e-08	rs73735499	k76	6	C	0.9233	0.99356	0.00389083	yes	yes	0	1	0	0
chr15	38996400	38996400	7.264e-23	rs11070167	k77	1	a	0.5712	0.281234	0.114749	yes	yes	0	1	0	1
chr15	38996326	38996326	1.28e-22	rs7180968	k77	1	c	0.4294	0.518467	0.0640294	yes	yes	0	1	0	1
chr21	33984405	33984405	2.797e-22	rs2834317	k78	1	a	0.1521	0.865801	0.865801	yes	yes	1	1	1	1
chr10	124792022	124792022	8.039e-22	rs12218394	k79	1	c	0.5714	0.927999	0.0160655	yes	yes	1	1	0	0
chr1	109397881	109397881	2.70878e-22	rs72646553	k80	1	C	0.2277	0.993906	0.037657	no	yes	1	1	1	1
chr1	109275908	109275908	1.2346e-16	rs646776	k80	2	T	0.7789	0.497328	0.232866	no	yes	0	1	0	1
chr1	109274968	109274968	2.21649e-16	rs12740374	k80	2	T	0.2207	0.839691	0.131089	no	yes	1	1	1	1
chr18	5601404	5601404	1.937e-21	rs1785418	k81	1	a	0.4748	0.986916	0.00636328	no	yes	1	0	0	0
chr2	43194322	43194322	4.5063e-18	rs12614953	k82	1	T	0.5173	0.537352	0.113014	no	yes	1	1	1	1
chr2	43196040	43196040	5.48228e-18	rs35936219	k82	1	T	0.5164	0.630293	0.0929405	no	yes	0	1	0	1
chr2	43194205	43194205	8.02144e-18	rs12617964	k82	1	A	0.5165	0.69436	0.064067	no	yes	1	1	1	1
chr2	43226582	43226582	9.18246e-16	rs112694524	k82	2	A	0.0725	0.0679543	0.0679543	no	yes	1	1	1	1
chr2	43300918	43300918	4.06248e-15	rs74382177	k82	2	A	0.0979	0.195648	0.014734	no	yes	0	1	0	0
chr2	43371021	43371021	5.87089e-15	rs78681698	k82	2	A	0.9047	0.293404	0.0102911	no	yes	1	0	0	0
chr2	43370003	43370003	6.57592e-15	rs76215753	k82	2	T	0.0975	0.361055	0.00921701	no	yes	0	1	0	0
chr2	43443044	43443044	8.24565e-15	rs17030798	k82	2	T	0.104	0.42655	0.00727329	no	yes	1	0	0	0
chr16	53185507	53185507	1.906e-20	rs11859591	k83	1	t	0.2932	0.627618	0.0116071	yes	yes	1	0	0	0
chr16	53131721	53131721	8.981e-20	rs73590892	k83	1	a	0.2863	0.91757	0.00255366	yes	yes	0	1	0	0
chr16	53130721	53130721	1.067e-19	rs116470308	k83	1	c	0.2862	0.941067	0.00219475	yes	yes	1	1	0	0
chr6	7203920	7203920	5.22759e-08	rs6910463	k84	3	T	0.6037	0.939992	0.0408791	yes	yes	1	1	1	1
chr15	63276985	63276985	1.74e-20	rs3784671	k85	1	a	0.4719	0.78827	0.153681	yes	yes	0	1	0	1
chr6	108677702	108677702	4.222e-20	rs1935952	k87	1	c	0.7069	0.837657	0.017299	no	yes	0	1	0	0
chr6	108622962	108622962	4.905e-19	rs3813498	k87	1	t	0.8114	0.982248	0.001657	no	yes	0	1	0	0
chr5	1201349	1201349	5.18043e-08	rs7379677	k88	3	A	0.1119	0.943282	0.00717427	no	yes	1	0	0	0
chr8	86320323	86320323	2.691e-18	rs2976178	k89	1	c	0.756	0.118484	0.118484	no	yes	1	0	1	0
chr8	86320316	86320316	3.541e-18	rs2953516	k89	1	t	0.2435	0.321619	0.0939188	no	yes	1	0	1	0
chr16	68328906	68328906	3.964e-16	rs2290698	k90	1	a	0.594	0.990987	0.00101402	no	no	1	1	0	0
chr12	56752285	56752285	2.81292e-08	rs2277339	k91	3	T	0.8933	0.625282	0.625282	yes	yes	1	1	1	1
chr2	113209498	113209498	2.006e-13	rs11123169	k94	1	t	0.6637	0.992389	0.992389	yes	yes	0	1	0	1
chr20	57568113	57568113	1.33807e-16	rs2235826	k97	1	A	0.812	0.425422	0.425422	yes	yes	1	0	1	0
chr22	38203357	38203357	6.012e-17	rs4821764	k98	1	a	0.5805	0.938191	0.0332208	yes	yes	0	1	0	1
chr20	63521166	63521166	4.97081e-18	rs72629024	k99	1	C	0.8506	0.876541	0.876541	no	yes	0	1	0	1
chr20	64080106	64080106	9.24217e-13	rs8126001	k99	2	T	0.4899	0.591418	0.2333	no	yes	1	0	1	0
chr20	64064578	64064578	1.02333e-12	rs6062343	k99	2	A	0.4382	0.801109	0.20969	no	yes	0	1	0	1
chr20	64064671	64064671	1.43418e-12	rs6062344	k99	2	T	0.4984	0.951076	0.149968	no	yes	0	1	0	1
chr20	63739537	63739537	4.5644e-12	rs4809331	k99	3	A	0.0796	0.509983	0.064165	no	yes	1	1	1	1
chr20	63721475	63721475	1.03687e-11	rs1758199	k99	3	T	0.0785	0.797131	0.0289542	no	yes	1	0	1	0
chr20	63699064	63699064	1.84109e-11	rs1291208	k99	3	T	0.0808	0.937179	0.0166035	no	yes	0	1	0	0
chr20	63697022	63697022	3.16522e-11	rs2738787	k99	3	A	0.0806	0.960306	0.00982682	no	yes	0	1	0	0
chr20	64286314	64286314	3.22591e-07	rs116843256	k99	4	T	0.1482	0.864554	0.0144726	no	yes	1	0	0	0
chr20	64255659	64255659	4.00539e-06	rs60461814	k99	4	T	0.1836	0.961117	0.00120206	no	yes	0	1	0	0
chr20	63721274	63721274	7.75519e-06	rs1291213	k99	4	T	0.2469	0.977979	0.000564262	no	yes	1	0	0	0
chr20	63739379	63739379	1.23702e-05	rs6122159	k99	4	T	0.2468	0.988071	0.000362329	no	yes	0	1	0	0
chr8	143939607	143939607	2.00745e-15	rs11784619	n1	1	A	0.0562	0.992891	0.00817517	no	no	1	1	0	0
chr8	143815893	143815893	2.04439e-08	rs73373197	n1	2	A	0.2932	0.522784	0.1994	no	no	0	1	0	1
chr14	72895231	72895231	9.58502e-14	rs3814863	n10	1	C	0.3445	0.547707	0.160179	no	yes	0	1	0	1
chr14	72894313	72894313	1.31704e-13	rs3814866	n10	1	A	0.6549	0.786608	0.117292	no	yes	1	1	1	1
chr14	72638287	72638287	3.8921e-08	rs757655	n10	2	T	0.559	0.752311	0.0664657	no	yes	0	1	0	1
chr14	72618053	72618053	7.3665e-06	rs2803963	n10	2	A	0.4526	0.989976	0.000434241	no	yes	0	1	0	0
chr8	133320717	133320717	2.24e-08	rs10283362	n100	1	t	0.1581	0.152519	0.152519	yes	yes	1	1	1	1
chr9	89605006	89605006	1.816e-05	rs3138499	n103	1	a	0.4812	0.967074	0.000980764	no	yes	1	1	0	0
chr9	89551008	89551008	3.573e-05	rs77640769	n103	1	c	0.9341	0.969981	0.000963404	no	yes	1	1	0	0
chr9	89549371	89549371	6.145e-05	rs17054974	n103	1	t	0.942	0.982922	0.000600433	no	yes	1	0	0	0
chr9	89604085	89604085	3.866e-05	rs3138490	n103	1	a	0.5188	0.988128	0.000474305	no	yes	1	0	0	0
chr9	89603395	89603395	4.037e-05	rs2031968	n103	1	t	0.4812	0.988581	0.000453365	no	yes	1	1	0	0
chr19	14075150	14075150	5.154e-10	rs7255254	n105	1	a	0.3573	0.727073	0.127636	no	yes	1	1	1	1
chr19	14062084	14062084	8.288e-09	rs7252372	n105	1	c	0.4374	0.981703	0.00853502	no	yes	1	1	0	0
chr19	14062139	14062139	1.241e-08	rs10421262	n105	1	t	0.5782	0.987565	0.00586235	no	yes	1	1	0	0
chr3	39153769	39153769	1.714e-09	rs784504	n107	1	c	0.807	0.716785	0.110572	no	yes	1	1	1	1
chr14	34843066	34843066	6.47e-06	rs60007157	n108	1	a	0.7519	0.777708	0.0046519	no	no	0	1	0	0
chr14	34982954	34982954	3.212e-05	rs12891283	n108	1	t	0.5544	0.940023	0.000892863	no	no	0	1	0	0
chr14	35047007	35047007	6.206e-05	rs799473	n108	1	t	0.848	0.963509	0.000640785	no	no	0	1	0	0
chr14	35046714	35046714	0.0006265	rs2295103	n108	1	c	0.8107	0.986017	6.91435e-05	no	no	0	1	0	0
chr14	35046893	35046893	0.000629	rs799474	n108	1	c	0.4314	0.987627	5.54939e-05	no	no	0	1	0	0
chr14	34781641	34781641	0.0007324	rs1959159	n108	1	a	0.3953	0.988574	5.03422e-05	no	no	0	1	0	0
chr14	35046751	35046751	0.001209	rs45530731	n108	1	a	0.1109	0.989732	4.63447e-05	no	no	0	1	0	0
chr3	124986267	124986267	8.276e-09	rs6438865	n109	1	a	0.3328	0.214886	0.0686427	yes	yes	0	1	0	1
chr3	124992251	124992251	1.336e-08	rs59471264	n109	1	a	0.3335	0.517839	0.0429329	yes	yes	1	0	1	0
chr3	125008934	125008934	2.82e-08	rs4368548	n109	1	t	0.6184	0.935583	0.0201509	yes	yes	1	0	0	0
chr3	125008903	125008903	2.897e-08	rs4395444	n109	1	a	0.3812	0.955489	0.0199056	yes	yes	1	0	0	0
chr6	20428201	20428201	1.92e-16	rs9465741	n11	1	a	0.5438	0.99446	0.99446	no	yes	1	0	1	0
chr4	1010000	1010000	1.99e-08	rs4569707	n111	1	c	0.706	0.871701	0.0391571	yes	yes	1	1	1	1
chr3	69787441	69787441	5.447e-08	rs62250977	n112	1	a	0.2237	0.758253	0.00816054	yes	yes	0	1	0	0
chr3	69762749	69762749	3.208e-07	rs62250968	n112	1	t	0.4313	0.933381	0.00129197	yes	yes	0	1	0	0
chr17	42347180	42347180	3.344e-09	rs35950888	n116	1	a	0.6483	0.171489	0.0541787	yes	yes	0	1	0	1
chr17	42387807	42387807	8.064e-08	rs3736164	n116	1	t	0.2818	0.992333	0.00242979	yes	yes	0	1	0	0
chr6	125899862	125899862	2.264e-08	rs11154336	n117	1	a	0.479	0.669929	0.038293	yes	yes	1	1	1	1
chr12	123984025	123984025	2.314e-08	rs7978610	n119	1	c	0.3321	0.785802	0.00942183	no	yes	1	0	0	0
chr8	94895839	94895839	9.152e-08	rs34208552	n125	1	c	0.3341	0.933963	0.00425853	no	yes	1	1	0	0
chr8	94895850	94895850	1.145e-07	rs34293080	n125	1	t	0.6659	0.94543	0.00344292	no	yes	1	1	0	0
chr8	94905542	94905542	1.59e-07	rs4735330	n125	1	a	0.3345	0.953114	0.00252254	no	yes	1	0	0	0
chr9	109441117	109441117	3.457e-09	rs10816810	n128	1	a	0.343	0.0812661	0.0812661	no	no	1	1	1	1
chr12	115314098	115314098	6.706e-08	rs1003385	n129	1	a	0.2163	0.338364	0.146025	no	yes	1	0	1	0
chr10	122374526	122374526	1.219e-07	rs7900012	n131	1	t	0.1623	0.81001	0.0209601	no	yes	1	1	0	0
chr14	67622713	67622713	8.513e-06	rs8013117	n134	1	a	0.2542	0.116985	0.0556045	no	no	0	1	0	1
chr14	67623106	67623106	1.826e-05	rs6573788	n134	1	t	0.7528	0.605389	0.027009	no	no	0	1	0	1
chr14	67564335	67564335	0.001104	rs10140512	n134	1	a	0.0521	0.934225	0.00108056	no	no	1	1	0	0
chr14	67622703	67622703	0.00203	rs61990120	n134	1	a	0.1398	0.946906	0.000422914	no	no	0	1	0	0
chr14	67526916	67526916	0.002213	rs12101021	n134	1	t	0.7271	0.954527	0.000306388	no	no	1	1	0	0
chr14	67584378	67584378	0.01245	rs147684286	n134	1	c	0.9923	0.959711	0.000250928	no	no	1	0	0	0
chr14	67695842	67695842	0.003415	rs17104597	n134	1	a	0.858	0.959961	0.000250037	no	no	1	1	0	0
chr14	67583970	67583970	0.01161	rs76327566	n134	1	a	0.9897	0.961639	0.000228563	no	no	1	0	0	0
chr14	67674312	67674312	0.005462	rs2234511	n134	1	a	0.8595	0.969529	0.000164231	no	no	0	1	0	0
chr14	67646066	67646066	0.008142	rs7151205	n134	1	a	0.86	0.976197	0.000115623	no	no	1	0	0	0
chr14	67667491	67667491	0.008173	rs72723115	n134	1	t	0.86	0.976313	0.000115377	no	no	1	0	0	0
chr14	67412320	67412320	0.01197	rs2296565	n134	1	a	0.5794	0.983101	6.2793e-05	no	no	1	1	0	0
chr14	67412000	67412000	0.02556	rs12888674	n134	1	a	0.6677	0.986609	3.21836e-05	no	no	1	1	0	0
chr14	67557417	67557417	0.04479	rs3825723	n134	1	a	0.845	0.987923	2.58028e-05	no	no	1	1	0	0
chr14	67461531	67461531	0.1415	rs77148991	n134	1	t	0.0205	0.987949	2.57502e-05	no	no	1	0	0	0
chr14	67360380	67360380	0.2232	rs533445951	n134	1	c	0.0137	0.988221	2.40724e-05	no	no	0	1	0	0
chr14	67412048	67412048	0.1273	rs115017102	n134	1	a	0.0321	0.988792	2.18038e-05	no	no	1	1	0	0
chr14	67526957	67526957	0.05684	rs72721018	n134	1	a	0.8064	0.989665	2.01462e-05	no	no	1	1	0	0
chr12	93570097	93570097	7.048e-08	rs2200160	n135	1	t	0.2125	0.530053	0.0697615	yes	yes	1	0	1	0
chr12	93591706	93591706	3.337e-06	rs11107120	n135	1	t	0.7744	0.980554	0.00169169	yes	yes	1	1	0	0
chr1	53739512	53739512	7.51e-07	rs75348889	n137	1	c	0.0933	0.982314	0.00170058	yes	yes	1	1	0	0
chr1	53740605	53740605	9.08e-07	rs797901	n137	1	c	0.0946	0.988082	0.00141625	yes	yes	1	0	0	0
chr12	65537114	65537114	6.822e-07	rs2245210	n139	1	a	0.2149	0.974078	0.000869763	no	no	0	1	0	0
chr12	65635099	65635099	7.937e-07	rs2254518	n139	1	t	0.8213	0.977305	0.000762803	no	no	1	1	0	0
chr4	5798767	5798767	2.759e-07	rs2279252	n141	1	a	0.0162	0.226166	0.226166	no	yes	1	0	1	0
chr4	5751326	5751326	5.262e-05	rs899694	n141	1	a	0.3511	0.989301	0.000730591	no	yes	1	1	0	0
chr6	106725104	106725104	9.537e-06	rs7766720	n142	1	t	0.9205	0.270188	0.270188	yes	yes	1	1	0	0
chr6	106721448	106721448	0.0002094	rs9386589	n142	1	t	0.0829	0.773049	0.0147469	yes	yes	0	1	0	0
chr6	106721447	106721447	0.000252	rs9400060	n142	1	a	0.0829	0.799706	0.0123399	yes	yes	0	1	0	0
chr6	106629632	106629632	0.141	rs72945092	n142	1	a	0.0138	0.938246	0.00011155	yes	yes	1	1	0	0
chr6	106629305	106629305	0.02627	rs9384625	n142	1	a	0.4827	0.939331	0.000106105	yes	yes	1	0	0	0
chr6	106731464	106731464	0.06707	rs77665351	n142	1	t	0.9422	0.940487	0.000104452	yes	yes	1	1	0	0
chr6	106820402	106820402	0.2177	rs1997966	n142	1	a	0.019	0.940902	0.000102817	yes	yes	0	1	0	0
chr6	106746778	106746778	0.3019	rs117941846	n142	1	a	0.0073	0.941209	0.000102133	yes	yes	0	1	0	0
chr6	106519956	106519956	0.3704	rs144881884	n142	1	t	0.993	0.944698	8.79812e-05	yes	yes	0	1	0	0
chr6	106750649	106750649	0.2947	rs78520295	n142	1	t	0.0111	0.947899	7.62289e-05	yes	yes	0	1	0	0
chr6	106629435	106629435	0.112	rs113968187	n142	1	a	0.0503	0.949463	7.21474e-05	yes	yes	1	1	0	0
chr6	106750804	106750804	0.8174	rs147273473	n142	1	a	0.0054	0.951071	6.83585e-05	yes	yes	0	1	0	0
chr6	106751489	106751489	0.215	rs62427583	n142	1	a	0.0221	0.952793	6.44823e-05	yes	yes	1	0	0	0
chr6	106739651	106739651	0.5169	rs139738683	n142	1	t	0.009	0.952986	6.39763e-05	yes	yes	1	1	0	0
chr6	106566659	106566659	0.7806	rs146932516	n142	1	t	0.9915	0.955332	6.02494e-05	yes	yes	1	0	0	0
chr6	106510995	106510995	0.1319	rs783422	n142	1	t	0.9349	0.9568	5.74085e-05	yes	yes	0	1	0	0
chr6	106694448	106694448	0.06353	rs2354549	n142	1	a	0.6543	0.960251	5.18771e-05	yes	yes	1	0	0	0
chr6	106781464	106781464	0.6792	rs140016587	n142	1	a	0.0099	0.960817	5.10914e-05	yes	yes	1	0	0	0
chr6	106751594	106751594	0.1866	rs72948573	n142	1	t	0.0558	0.963477	4.74566e-05	yes	yes	1	1	0	0
chr6	107028072	107028072	0.5536	rs111504202	n142	1	t	0.017	0.96737	4.41915e-05	yes	yes	1	1	0	0
chr6	106546757	106546757	0.5551	rs17067245	n142	1	a	0.0297	0.969291	4.30096e-05	yes	yes	0	1	0	0
chr6	107028024	107028024	0.6326	rs112797051	n142	1	a	0.9835	0.970729	4.16549e-05	yes	yes	1	1	0	0
chr6	106510869	106510869	0.2014	rs783423	n142	1	a	0.0661	0.97297	3.99797e-05	yes	yes	0	1	0	0
chr6	107027957	107027957	0.8822	rs112340971	n142	1	t	0.9838	0.973605	3.94924e-05	yes	yes	1	1	0	0
chr6	107028202	107028202	0.9172	rs55823720	n142	1	t	0.0176	0.973841	3.92576e-05	yes	yes	1	1	0	0
chr6	106694270	106694270	0.8233	rs17567332	n142	1	t	0.0255	0.974115	3.90265e-05	yes	yes	1	0	0	0
chr6	106702666	106702666	0.8564	rs77642179	n142	1	a	0.9722	0.974387	3.87844e-05	yes	yes	1	1	0	0
chr6	106773449	106773449	0.8643	rs4945761	n142	1	a	0.0271	0.975877	3.72257e-05	yes	yes	1	1	0	0
chr6	106694222	106694222	0.9112	rs79676563	n142	1	a	0.965	0.976248	3.68084e-05	yes	yes	1	0	0	0
chr6	106739506	106739506	0.7339	rs56688330	n142	1	t	0.0258	0.976468	3.65516e-05	yes	yes	1	1	0	0
chr6	106512061	106512061	0.228	rs783420	n142	1	c	0.0661	0.976541	3.64767e-05	yes	yes	0	1	0	0
chr6	106512086	106512086	0.1257	rs4946759	n142	1	a	0.1868	0.976577	3.64081e-05	yes	yes	0	1	0	0
chr6	106820571	106820571	0.9823	rs72931655	n142	1	t	0.0182	0.977467	3.48573e-05	yes	yes	0	1	0	0
chr6	106781184	106781184	0.6688	rs12529841	n142	1	a	0.0262	0.97822	3.34009e-05	yes	yes	1	0	0	0
chr6	106804793	106804793	0.2589	rs910529	n142	1	a	0.0675	0.978353	3.32907e-05	yes	yes	0	1	0	0
chr6	106804895	106804895	0.2885	rs11752168	n142	1	a	0.0675	0.97989	3.08467e-05	yes	yes	0	1	0	0
chr6	106684207	106684207	0.3566	rs73509865	n142	1	t	0.939	0.981143	2.89948e-05	yes	yes	1	0	0	0
chr6	106684549	106684549	0.7856	rs187801561	n142	1	t	0.971	0.98211	2.81285e-05	yes	yes	1	0	0	0
chr6	106591652	106591652	0.3041	rs12530093	n142	1	t	0.0776	0.98225	2.78336e-05	yes	yes	0	1	0	0
chr6	106591845	106591845	0.3108	rs12523666	n142	1	a	0.0776	0.982637	2.74491e-05	yes	yes	0	1	0	0
chr6	106799814	106799814	0.1549	rs3117413	n142	1	t	0.2955	0.983018	2.71107e-05	yes	yes	1	0	0	0
chr6	106629627	106629627	0.157	rs2054365	n142	1	a	0.4085	0.985567	2.4447e-05	yes	yes	1	1	0	0
chr6	107028304	107028304	0.6968	rs76852209	n142	1	c	0.0494	0.986099	2.39263e-05	yes	yes	1	1	0	0
chr6	106799256	106799256	0.882	rs111738670	n142	1	a	0.0474	0.986894	2.30485e-05	yes	yes	0	1	0	0
chr6	106566859	106566859	0.3326	rs9486403	n142	1	a	0.8911	0.987305	2.27477e-05	yes	yes	1	0	0	0
chr6	106512124	106512124	0.3057	rs1340623	n142	1	c	0.1222	0.987351	2.26934e-05	yes	yes	0	1	0	0
chr6	107064662	107064662	0.2939	rs9486512	n142	1	c	0.1658	0.98809	2.21593e-05	yes	yes	1	1	0	0
chr6	106572464	106572464	0.3619	rs56257618	n142	1	t	0.1024	0.988552	2.18931e-05	yes	yes	1	0	0	0
chr6	106566767	106566767	0.3535	rs9480685	n142	1	t	0.1089	0.988596	2.18868e-05	yes	yes	1	0	0	0
chr6	106572574	106572574	0.3572	rs58742517	n142	1	a	0.1089	0.989163	2.16978e-05	yes	yes	1	0	0	0
chr6	106575130	106575130	0.368	rs6926307	n142	1	a	0.8912	0.989873	2.1353e-05	yes	yes	0	1	0	0
chr15	65979434	65979434	0.005096	rs428658	n144	1	t	0.9105	0.988118	5.68568e-05	yes	yes	0	1	0	0
chr15	65979704	65979704	0.007427	rs11854757	n144	1	a	0.9108	0.989503	4.08368e-05	yes	yes	0	1	0	0
chr1	94246808	94246808	3.54e-08	rs61784299	n146	1	a	0.3124	0.68542	0.0149654	yes	yes	0	1	0	0
chr1	94463929	94463929	3.356e-08	rs927728	n146	1	t	0.4793	0.699946	0.0145259	yes	yes	1	0	0	0
chr1	94265398	94265398	5.997e-08	rs17396055	n146	1	a	0.3309	0.914399	0.00888445	yes	yes	0	1	0	0
chr1	94131275	94131275	2.673e-07	rs6686599	n146	1	a	0.3679	0.969287	0.00204479	yes	yes	0	1	0	0
chr1	94126239	94126239	1.408e-06	rs34497591	n146	1	t	0.3796	0.988113	0.000410759	yes	yes	1	1	0	0
chr4	94641726	94641726	2.887e-08	rs17021918	n147	1	t	0.3484	0.633881	0.0244394	no	yes	1	1	0	0
chr9	127979614	127979614	2.623e-06	rs1571141	n148	1	a	0.8747	0.893648	0.00367145	yes	yes	0	1	0	0
chr9	127932447	127932447	3.439e-06	rs4837209	n148	1	c	0.8727	0.896552	0.00290437	yes	yes	0	1	0	0
chr9	127937638	127937638	3.326e-06	rs2274424	n148	1	a	0.8719	0.899401	0.00284848	yes	yes	0	1	0	0
chr9	127973658	127973658	4.877e-06	rs7865476	n148	1	t	0.9507	0.902231	0.00283067	yes	yes	1	0	0	0
chr9	127952339	127952339	3.644e-06	rs4836595	n148	1	a	0.8719	0.910369	0.00261438	yes	yes	1	1	0	0
chr9	127955698	127955698	3.686e-06	rs7028190	n148	1	a	0.1281	0.915516	0.00256554	yes	yes	1	1	0	0
chr9	127919613	127919613	3.813e-06	rs4837205	n148	1	t	0.128	0.920607	0.00253484	yes	yes	1	1	0	0
chr9	127942841	127942841	3.82e-06	rs1043060	n148	1	t	0.8696	0.923061	0.00245387	yes	yes	1	0	0	0
chr9	127955841	127955841	4.154e-06	rs7028676	n148	1	a	0.8718	0.930218	0.00230041	yes	yes	0	1	0	0
chr9	127991375	127991375	6.881e-06	rs75465804	n148	1	t	0.9511	0.942892	0.00206365	yes	yes	1	0	0	0
chr9	127937972	127937972	4.861e-06	rs6478802	n148	1	t	0.128	0.946848	0.00196896	yes	yes	1	1	0	0
chr9	127943849	127943849	5.308e-06	rs11789803	n148	1	a	0.1228	0.958157	0.00184042	yes	yes	1	1	0	0
chr9	127943817	127943817	5.832e-06	rs2031693	n148	1	c	0.8772	0.961623	0.00168634	yes	yes	1	1	0	0
chr9	127968698	127968698	1.349e-05	rs76415427	n148	1	t	0.9513	0.978927	0.00109106	yes	yes	0	1	0	0
chr9	128007464	128007464	2.213e-05	rs75390484	n148	1	a	0.0474	0.989851	0.000694803	yes	yes	1	1	0	0
chr11	75803335	75803335	3.032e-07	rs11236533	n149	1	t	0.0895	0.178114	0.0180496	no	yes	1	0	0	0
chr11	75760804	75760804	9.97e-07	rs10899115	n149	1	a	0.9027	0.902165	0.00554233	no	yes	1	0	0	0
chr11	75803483	75803483	7.477e-06	rs11236534	n149	1	t	0.9121	0.977556	0.000881873	no	yes	1	0	0	0
chr8	119874681	119874681	1.67867e-12	rs2326379	n15	1	T	0.6922	0.482524	0.0869925	yes	yes	0	1	0	1
chr8	119873704	119873704	5.25954e-12	rs7840156	n15	1	T	0.6927	0.863773	0.0285291	yes	yes	1	1	1	1
chr8	119978215	119978215	5.41192e-09	rs1106481	n15	2	T	0.2564	0.456909	0.0398796	yes	yes	1	0	1	0
chr8	119978207	119978207	5.86196e-09	rs1106482	n15	2	A	0.7436	0.530983	0.0368829	yes	yes	1	0	1	0
chr8	120001531	120001531	2.26456e-08	rs2271900	n15	2	A	0.2734	0.923772	0.00979982	yes	yes	0	1	0	0
chr8	120089283	120089283	8.64834e-08	rs876084	n15	2	T	0.3887	0.987794	0.00251134	yes	yes	1	0	0	0
chr6	130827242	130827242	1.906e-07	rs9402288	n150	1	a	0.7019	0.781042	0.0225074	no	no	1	0	0	0
chr6	130827346	130827346	1.924e-07	rs9402289	n150	1	t	0.2981	0.803155	0.022113	no	no	1	0	0	0
chr6	130827597	130827597	2.1e-07	rs1044303	n150	1	a	0.2983	0.845119	0.0206121	no	no	1	0	0	0
chr17	45172077	45172077	0.0001968	rs4792867	n151	1	t	0.2982	0.98865	0.000403435	no	yes	0	1	0	0
chr5	127073496	127073496	1.015e-08	rs13154281	n152	1	c	0.5362	0.122638	0.0148269	yes	yes	1	1	0	0
chr5	127011258	127011258	2.405e-08	rs12515192	n152	1	a	0.5192	0.588728	0.00622727	yes	yes	0	1	0	0
chr3	57544429	57544429	5.974e-08	rs9311652	n153	1	a	0.17	0.0752445	0.0752445	no	yes	1	0	1	0
chr3	57596361	57596361	2.584e-07	rs4340676	n153	1	a	0.1728	0.249356	0.0178355	no	yes	1	0	0	0
chr3	57597538	57597538	3.745e-07	rs9844780	n153	1	a	0.1732	0.497656	0.0125631	no	yes	1	1	0	0
chr3	57596651	57596651	4.171e-07	rs4340677	n153	1	a	0.1732	0.651737	0.0112909	no	yes	1	1	0	0
chr3	57694141	57694141	9.067e-07	rs4681743	n153	1	t	0.8217	0.900057	0.00535655	no	yes	0	1	0	0
chr3	57597784	57597784	1.136e-05	rs9882859	n153	1	t	0.4449	0.983191	0.000375632	no	yes	0	1	0	0
chr22	19122442	19122442	2.774e-08	rs2283643	n154	1	a	0.1953	0.538229	0.0160944	no	no	1	1	0	0
chr22	19085574	19085574	3.149e-08	rs7284846	n154	1	t	0.1962	0.723238	0.0131638	no	no	0	1	0	0
chr22	19066780	19066780	4.161e-08	rs17810780	n154	1	t	0.8095	0.839207	0.0100987	no	no	0	1	0	0
chr22	19066647	19066647	4.885e-08	rs73158808	n154	1	c	0.1904	0.885231	0.00853068	no	no	0	1	0	0
chr16	30091839	30091839	1.591e-07	rs3809627	n155	1	a	0.4106	0.242772	0.242772	no	yes	1	1	1	1
chr16	30409530	30409530	7.568e-06	rs11150586	n155	1	t	0.3807	0.758033	0.00588312	no	yes	1	1	0	0
chr16	30395948	30395948	8.716e-06	rs13333093	n155	1	a	0.6138	0.785587	0.00512934	no	yes	0	1	0	0
chr16	30378993	30378993	1.493e-05	rs12447833	n155	1	t	0.3503	0.87289	0.00315221	no	yes	0	1	0	0
chr16	30123358	30123358	1.64e-05	rs61764202	n155	1	t	0.3321	0.882096	0.00298652	no	yes	1	0	0	0
chr16	30096460	30096460	7.279e-05	rs73530179	n155	1	a	0.5258	0.978727	0.000679344	no	yes	1	1	0	0
chr16	30090275	30090275	8.533e-05	rs8060511	n155	1	a	0.4751	0.981318	0.000587472	no	yes	0	1	0	0
chr16	30335371	30335371	0.0002169	rs146098127	n155	1	a	0.6342	0.986611	0.000279708	no	yes	1	0	0	0
chr8	85463306	85463306	1.449e-08	rs3758076	n156	1	c	0.6018	0.59726	0.0453964	no	no	1	1	1	1
chr8	85463274	85463274	1.828e-08	rs3758077	n156	1	a	0.6017	0.716276	0.0358946	no	no	1	1	1	1
chr8	85477174	85477174	7.658e-08	rs703	n156	1	t	0.3889	0.964204	0.00903733	no	no	1	0	0	0
chr17	37743158	37743158	5.127e-07	rs9901746	n157	1	a	0.4213	0.806246	0.11755	no	yes	0	1	0	1
chr17	37742842	37742842	8.131e-07	rs757209	n157	1	a	0.4213	0.959269	0.0744118	no	yes	0	1	0	1
chr1	211323749	211323749	1.401e-06	rs1533217	n158	1	a	0.6173	0.825996	0.00548685	yes	yes	0	1	0	0
chr1	211372002	211372002	6.228e-06	rs3738199	n158	1	a	0.6264	0.968311	0.00134129	yes	yes	0	1	0	0
chr2	203450671	203450671	5.041e-06	rs11679740	n159	1	a	0.5544	0.299189	0.0208477	yes	no	1	0	0	0
chr2	203450895	203450895	2.952e-05	rs72926436	n159	1	t	0.5498	0.953584	0.00393594	yes	no	1	0	0	0
chr4	143184856	143184856	6.94282e-10	rs62330278	n16	2	A	0.4108	0.492278	0.00553043	yes	yes	1	1	0	0
chr14	103386270	103386270	1.974e-06	rs12436956	n160	1	t	0.2864	0.124744	0.0175021	yes	no	0	1	0	0
chr14	103378561	103378561	5.538e-06	rs11621300	n160	1	t	0.2763	0.884501	0.00648973	yes	no	1	0	0	0
chr14	103607214	103607214	6.348e-05	rs745079	n160	1	a	0.6599	0.972754	0.000607622	yes	no	0	1	0	0
chr14	103595309	103595309	0.00011	rs1078756	n160	1	a	0.2642	0.981378	0.000387943	yes	no	1	1	0	0
chr14	103625097	103625097	0.0001462	rs3759586	n160	1	a	0.3382	0.983033	0.000278572	yes	no	0	1	0	0
chr14	103378293	103378293	0.0002453	rs58153827	n160	1	a	0.2119	0.987778	0.000196782	yes	no	1	0	0	0
chr11	122642847	122642847	2.899e-06	rs10790517	n161	1	a	0.6128	0.924837	0.00308901	yes	no	0	1	0	0
chr11	122647095	122647095	3.228e-06	rs10892870	n161	1	a	0.6117	0.930736	0.00281225	yes	no	0	1	0	0
chr11	122655793	122655793	4.879e-06	rs7127978	n161	1	a	0.6306	0.962236	0.00187188	yes	no	1	1	0	0
chr11	122655893	122655893	5.874e-06	rs7128198	n161	1	t	0.3693	0.977476	0.00156627	yes	no	1	1	0	0
chr11	122656412	122656412	7.048e-06	rs7129071	n161	1	a	0.3693	0.981721	0.00131558	yes	no	0	1	0	0
chr11	70175038	70175038	3.11e-06	rs78243950	n163	1	a	0.1349	0.92112	0.00551487	yes	no	1	0	0	0
chr11	70175163	70175163	3.327e-06	rs75725796	n163	1	a	0.1349	0.947281	0.00518216	yes	no	1	0	0	0
chr1	245298946	245298946	2.468e-06	rs6665809	n165	1	t	0.316	0.959592	0.00438349	no	yes	1	1	0	0
chr4	38687569	38687569	4.305e-07	rs4240247	n166	1	t	0.795	0.905831	0.0141644	no	yes	0	1	0	0
chr17	4987797	4987797	3.051e-05	rs76016560	n167	1	a	0.1266	0.961123	0.000670016	yes	yes	1	1	0	0
chr17	4949010	4949010	3.564e-05	rs2283568	n167	1	a	0.1227	0.966943	0.000599496	yes	yes	1	0	0	0
chr17	5282070	5282070	6.149e-05	rs113151753	n167	1	c	0.8754	0.971825	0.00035612	yes	yes	1	0	0	0
chr17	4903443	4903443	6.547e-05	rs35031588	n167	1	a	0.8601	0.974165	0.000318818	yes	yes	0	1	0	0
chr17	4850439	4850439	9.24e-05	rs72835021	n167	1	a	0.9047	0.979707	0.000265778	yes	yes	0	1	0	0
chr17	4910070	4910070	0.0001566	rs8081611	n167	1	t	0.905	0.988601	0.000163606	yes	yes	0	1	0	0
chr17	4987548	4987548	0.0001109	rs8071428	n167	1	t	0.2432	0.989085	0.000160262	yes	yes	1	1	0	0
chr17	4909783	4909783	0.0001586	rs8077580	n167	1	t	0.904	0.989245	0.000159572	yes	yes	0	1	0	0
chr17	4909108	4909108	0.0001603	rs16954243	n167	1	a	0.9047	0.989562	0.000158382	yes	yes	1	1	0	0
chr3	15903262	15903262	7.982e-07	rs114866886	n168	1	a	0.0128	0.993709	0.0103848	yes	yes	1	0	0	0
chr13	48096945	48096945	2.874e-14	rs1571256	n17	1	a	0.3402	0.313995	0.0618741	yes	yes	1	0	1	0
chr13	48122008	48122008	7.463e-14	rs7326363	n17	1	c	0.34	0.927014	0.0242482	yes	yes	1	1	0	0
chr8	17467373	17467373	2.388e-06	rs2720526	n170	1	a	0.7363	0.501716	0.0532533	no	no	0	1	0	1
chr8	17467346	17467346	2.57e-06	rs2720527	n170	1	t	0.7362	0.551402	0.0496854	no	no	0	1	0	1
chr8	17467259	17467259	3.021e-06	rs2588172	n170	1	t	0.2637	0.642834	0.0426907	no	no	0	1	0	1
chr8	17576830	17576830	4.907e-05	rs2517262	n170	1	a	0.7991	0.920117	0.00347315	no	no	0	1	0	0
chr3	152385811	152385811	1.538e-05	rs13093929	n172	1	a	0.7388	0.981679	0.00523617	no	yes	0	1	0	0
chr4	95165950	95165950	3.794e-06	rs7694531	n173	1	a	0.4079	0.951164	0.00406269	no	yes	1	0	0	0
chr4	95250924	95250924	0.0001691	rs4699415	n173	1	a	0.3273	0.989392	0.000118034	no	yes	1	0	0	0
chr16	84738928	84738928	2.897e-07	rs36081182	n174	1	a	0.2787	0.661805	0.0364199	no	yes	1	0	1	0
chr16	84740514	84740514	3.037e-07	rs4510001	n174	1	t	0.4074	0.72918	0.0316659	no	yes	1	0	1	0
chr16	84740019	84740019	3.556e-07	rs12149780	n174	1	t	0.5919	0.786223	0.0276172	no	yes	0	1	0	1
chr16	84726455	84726455	3.636e-06	rs62048854	n174	1	a	0.426	0.902078	0.00292689	no	yes	1	1	0	0
chr16	84726152	84726152	4.664e-06	rs8052070	n174	1	t	0.4262	0.925551	0.00229989	no	yes	1	1	0	0
chr16	84741193	84741193	1.083e-05	rs60566983	n174	1	a	0.7837	0.951044	0.00122115	no	yes	0	1	0	0
chr16	84726267	84726267	9.325e-06	rs11149678	n174	1	t	0.5851	0.95225	0.00120637	no	yes	1	1	0	0
chr16	84730885	84730885	1.376e-05	rs62048856	n174	1	a	0.2095	0.969485	0.000973798	no	yes	0	1	0	0
chr16	84738867	84738867	2.405e-05	rs34139611	n174	1	t	0.2093	0.982852	0.000579044	no	yes	1	1	0	0
chr16	84739854	84739854	2.6e-05	rs34923260	n174	1	a	0.7906	0.985026	0.00053303	no	yes	0	1	0	0
chr11	32707227	32707227	1.084e-05	rs115618387	n175	1	t	0.0558	0.99003	0.000945193	yes	yes	0	1	0	0
chr8	6506429	6506429	2.422e-07	rs2442468	n176	1	c	0.4881	0.829738	0.0155528	no	no	1	0	0	0
chr8	6515444	6515444	3.355e-07	rs2515424	n176	1	t	0.4367	0.910962	0.0110605	no	no	1	0	0	0
chr8	6506102	6506102	4.565e-07	rs17077194	n176	1	c	0.4828	0.919275	0.00831289	no	no	1	0	0	0
chr8	6515454	6515454	5.188e-06	rs3020219	n176	1	t	0.373	0.977341	0.000832477	no	no	1	0	0	0
chr8	6515535	6515535	5.323e-06	rs2959791	n176	1	t	0.6264	0.979782	0.0008041	no	no	1	0	0	0
chr8	6506463	6506463	5.683e-06	rs3020210	n176	1	a	0.3615	0.982128	0.000764243	no	no	1	0	0	0
chr8	6515283	6515283	6.268e-06	rs2916726	n176	1	a	0.6262	0.985637	0.000683763	no	no	1	0	0	0
chr8	134682867	134682867	2.127e-06	rs4398863	n179	1	c	0.7335	0.943097	0.00304305	no	yes	1	0	0	0
chr8	134685708	134685708	2.515e-06	rs7829427	n179	1	a	0.2665	0.945701	0.00260392	no	yes	1	0	0	0
chr8	134720657	134720657	2.555e-05	rs67880203	n179	1	t	0.1569	0.983348	0.000342456	no	yes	1	0	0	0
chr8	134595580	134595580	2.355e-05	rs2119880	n179	1	a	0.2162	0.984698	0.000331744	no	yes	0	1	0	0
chr8	134595890	134595890	2.901e-05	rs11998509	n179	1	t	0.7838	0.988547	0.000270173	no	yes	0	1	0	0
chr8	22668467	22668467	2.655e-13	rs2280104	n18	1	t	0.3514	0.668493	0.144786	no	yes	0	1	0	1
chr8	22622475	22622475	6.234e-12	rs11136093	n18	1	c	0.6784	0.909454	0.00680668	no	yes	1	1	0	0
chr8	22599875	22599875	8.599e-12	rs2272718	n18	1	a	0.3286	0.92095	0.0048947	no	yes	0	1	0	0
chr8	22599693	22599693	1.65e-11	rs755935	n18	1	t	0.6748	0.939225	0.00281389	no	yes	0	1	0	0
chr8	22634109	22634109	1.754e-11	rs35952885	n18	1	t	0.6784	0.949847	0.00246901	no	yes	1	0	0	0
chr8	22604861	22604861	1.814e-11	rs3735901	n18	1	t	0.6707	0.954593	0.00237243	no	yes	1	1	0	0
chr8	22599692	22599692	2.319e-11	rs755934	n18	1	t	0.6748	0.969753	0.00205467	no	yes	0	1	0	0
chr8	22597313	22597313	2.463e-11	rs3735894	n18	1	a	0.6619	0.975307	0.00176491	no	yes	1	1	0	0
chr8	22595191	22595191	2.822e-11	rs3735893	n18	1	a	0.6602	0.983262	0.00151358	no	yes	0	1	0	0
chr2	207529807	207529807	4.266e-07	rs2464976	n180	1	t	0.1915	0.71901	0.0122717	no	no	1	1	0	0
chr7	2633338	2633338	3.274e-07	rs12670408	n181	1	t	0.5333	0.662371	0.041818	no	no	0	1	0	1
chr7	2636028	2636028	8.98e-07	rs1105421	n181	1	t	0.4311	0.778587	0.0163133	no	no	1	0	0	0
chr7	2636122	2636122	9.154e-07	rs1105420	n181	1	t	0.4311	0.794554	0.0159669	no	no	1	0	0	0
chr7	2633432	2633432	1.187e-06	rs10950803	n181	1	a	0.5679	0.876353	0.0123669	no	no	0	1	0	0
chr7	2524038	2524038	1.988e-06	rs13234810	n181	1	a	0.6798	0.907021	0.00841703	no	no	0	1	0	0
chr7	2631589	2631589	2.882e-06	rs10274923	n181	1	a	0.5552	0.952965	0.00535351	no	no	1	1	0	0
chr7	2516523	2516523	1.174e-05	rs1982157	n181	1	a	0.2638	0.968808	0.00158398	no	no	1	1	0	0
chr7	2517199	2517199	0.0002085	rs190655193	n181	1	a	0.0187	0.989196	0.000267575	no	no	0	1	0	0
chr11	17014633	17014633	2.622e-07	rs34986803	n182	1	a	0.352	0.0936589	0.0310182	yes	yes	1	0	1	0
chr11	17013090	17013090	3.006e-07	rs6486336	n182	1	t	0.3474	0.120328	0.026669	yes	yes	1	1	1	1
chr11	17013097	17013097	3.497e-07	rs6486337	n182	1	c	0.3474	0.167538	0.0231639	yes	yes	1	1	0	0
chr11	17013328	17013328	4.762e-07	rs6486339	n182	1	a	0.6528	0.486653	0.0173594	yes	yes	1	1	0	0
chr11	17014544	17014544	1.917e-06	rs75533032	n182	1	c	0.6501	0.968729	0.00489637	yes	yes	1	0	0	0
chr11	17014610	17014610	2.424e-06	rs35115039	n182	1	a	0.3463	0.977163	0.00393083	yes	yes	1	0	0	0
chr11	16982937	16982937	2.708e-06	rs7481059	n182	1	a	0.6214	0.980328	0.00316541	yes	yes	0	1	0	0
chr10	115000335	115000335	0.0003255	rs12779231	n184	1	a	0.3534	0.921986	0.000795316	no	yes	1	1	0	0
chr10	114758303	114758303	0.004981	rs143120938	n184	1	t	0.9695	0.983008	0.000163292	no	yes	0	1	0	0
chr10	114876962	114876962	0.001736	rs10510007	n184	1	a	0.5972	0.983334	0.000163129	no	yes	1	0	0	0
chr10	110209375	110209375	1.123e-06	rs72830443	n185	1	a	0.0712	0.850893	0.0128315	yes	no	0	1	0	0
chr10	110222177	110222177	2.369e-06	rs12414179	n185	1	a	0.0725	0.912928	0.00623891	yes	no	0	1	0	0
chr18	35041267	35041267	2.908e-08	rs530081	n186	1	a	0.3244	0.605818	0.234178	no	yes	1	1	1	1
chr16	87952530	87952530	9.563e-07	rs7186168	n187	1	t	0.342	0.566187	0.0130566	no	no	1	1	0	0
chr16	87950871	87950871	1.169e-06	rs6540119	n187	1	a	0.337	0.577115	0.0109289	no	no	1	1	0	0
chr16	87966897	87966897	1.906e-06	rs11117317	n187	1	t	0.3419	0.658141	0.00668283	no	no	1	1	0	0
chr16	87983157	87983157	2.33e-06	rs12918162	n187	1	a	0.6561	0.787987	0.0054239	no	no	1	0	0	0
chr16	87983026	87983026	2.472e-06	rs11639873	n187	1	a	0.6514	0.809275	0.00525691	no	no	1	0	0	0
chr16	87982952	87982952	2.458e-06	rs12919517	n187	1	a	0.3438	0.824907	0.00520141	no	no	1	0	0	0
chr16	87966986	87966986	2.493e-06	rs11117320	n187	1	t	0.6578	0.830078	0.00517126	no	no	1	1	0	0
chr16	87967120	87967120	2.484e-06	rs11117322	n187	1	t	0.6579	0.835249	0.00517126	no	no	1	1	0	0
chr16	87967098	87967098	2.53e-06	rs11117321	n187	1	c	0.3422	0.845453	0.00508716	no	no	1	1	0	0
chr16	87966958	87966958	2.645e-06	rs11117319	n187	1	t	0.6578	0.860373	0.0048791	no	no	1	1	0	0
chr16	87966917	87966917	2.703e-06	rs11117318	n187	1	t	0.6578	0.884323	0.00476478	no	no	1	1	0	0
chr16	87983095	87983095	1.884e-05	rs11645107	n187	1	a	0.3427	0.982837	0.000818884	no	no	1	0	0	0
chr16	87983063	87983063	2.221e-05	rs11646226	n187	1	t	0.3464	0.984277	0.000705841	no	no	1	0	0	0
chr16	87982787	87982787	2.886e-05	rs11648703	n187	1	c	0.6565	0.985436	0.000537143	no	no	1	0	0	0
chr18	13369938	13369938	0.002294	rs79041076	n189	1	a	0.0977	0.986648	0.000173215	no	no	1	1	0	0
chr18	13471200	13471200	0.0018	rs8084766	n189	1	t	0.4433	0.987737	0.000124074	no	no	1	0	0	0
chr2	231227588	231227588	4.06e-08	rs16827879	n190	1	t	0.2436	0.0550859	0.0550859	yes	yes	1	1	1	1
chr2	231190183	231190183	4.247e-08	rs55748426	n190	1	c	0.2207	0.109326	0.0542398	yes	yes	1	0	1	0
chr2	231190439	231190439	4.259e-08	rs6761645	n190	1	a	0.2207	0.163566	0.0542398	yes	yes	1	0	1	0
chr2	231198864	231198864	1.666e-07	rs3731775	n190	1	a	0.2504	0.701309	0.013759	yes	yes	1	1	0	0
chr9	100586352	100586352	7.967e-07	rs2780956	n191	1	a	0.4132	0.124873	0.124873	no	yes	0	1	0	1
chr9	100575975	100575975	2.271e-06	rs2800285	n191	1	t	0.4132	0.910885	0.0448493	no	yes	0	1	0	1
chr9	100575793	100575793	0.000124	rs2780959	n191	1	t	0.6098	0.98203	0.00101814	no	yes	0	1	0	0
chr9	100575730	100575730	0.0003186	rs2800284	n191	1	t	0.6652	0.986849	0.000437311	no	yes	0	1	0	0
chr22	23771357	23771357	0.004404	rs131451	n192	1	t	0.8921	0.98946	9.92714e-05	yes	yes	0	1	0	0
chr5	77492094	77492094	0.0001005	rs42764	n193	1	c	0.5684	0.82985	0.00248652	no	no	0	1	0	0
chr5	77492617	77492617	0.0003231	rs40012	n193	1	c	0.48	0.942627	0.00082754	no	no	1	0	0	0
chr5	77356984	77356984	0.007092	rs12522076	n193	1	c	0.7306	0.989248	5.46179e-05	no	no	1	1	0	0
chr19	1232559	1232559	5.698e-08	rs12977299	n194	1	t	0.7269	0.80116	0.0746184	yes	yes	0	1	0	1
chr8	141237440	141237440	5.73e-06	rs4437700	n195	1	t	0.4324	0.885046	0.0139897	no	yes	0	1	0	0
chr8	141237880	141237880	9.437e-05	rs12543725	n195	1	a	0.4167	0.972251	0.000979498	no	yes	1	0	0	0
chr8	141235217	141235217	0.000137	rs34591810	n195	1	t	0.4255	0.980536	0.000692322	no	yes	0	1	0	0
chr8	141235000	141235000	0.0001482	rs35313521	n195	1	a	0.4255	0.98317	0.000644341	no	yes	1	1	0	0
chr3	143001992	143001992	3.572e-06	rs17557029	n197	1	t	0.6271	0.672529	0.0106067	yes	yes	0	1	0	0
chr3	143001506	143001506	8.708e-06	rs766360	n197	1	a	0.6268	0.870553	0.00451023	yes	yes	1	1	0	0
chr17	31328200	31328200	0.0001444	rs17885030	n198	1	t	0.6123	0.465184	0.00698426	no	no	0	1	0	0
chr17	31327858	31327858	0.0001697	rs2285894	n198	1	a	0.6123	0.541837	0.00598999	no	no	0	1	0	0
chr17	31327956	31327956	0.0002067	rs3815154	n198	1	a	0.6119	0.647127	0.0050063	no	no	0	1	0	0
chr17	31559321	31559321	0.0005505	rs183604092	n198	1	t	0.0453	0.694471	0.00460928	no	no	1	0	0	0
chr17	31189095	31189095	0.001135	rs2952989	n198	1	a	0.6943	0.930678	0.00108928	no	no	1	0	0	0
chr17	31394557	31394557	0.03241	rs76571954	n198	1	t	0.0066	0.967913	0.000260131	no	no	1	0	0	0
chr17	31468204	31468204	0.01394	rs4794889	n198	1	t	0.6445	0.979778	0.000110602	no	no	1	0	0	0
chr17	31495303	31495303	0.1123	rs149854872	n198	1	t	0.0149	0.983302	7.46524e-05	no	no	1	1	0	0
chr17	31533561	31533561	0.1864	rs146973893	n198	1	a	0.9921	0.983586	6.92352e-05	no	no	0	1	0	0
chr17	31565167	31565167	0.14	rs118043603	n198	1	a	0.0286	0.985874	4.78779e-05	no	no	0	1	0	0
chr17	31559361	31559361	0.2722	rs112566949	n198	1	t	0.0182	0.988801	3.623e-05	no	no	1	0	0	0
chr7	50677211	50677211	1.295e-17	rs17546879	n2	1	t	0.0995	0.277046	0.076476	yes	yes	1	0	1	0
chr7	102253445	102253445	1.313e-10	rs2529114	n20	1	t	0.5583	0.989126	0.00117189	no	yes	1	0	0	0
chr8	60516811	60516811	3.379e-05	rs80278351	n200	1	a	0.1407	0.904974	0.00413849	no	no	1	1	0	0
chr8	60653604	60653604	0.001076	rs612558	n200	1	t	0.457	0.988891	0.000114522	no	no	1	1	0	0
chr8	60652405	60652405	0.00111	rs685985	n200	1	a	0.5427	0.989115	0.000111557	no	no	1	1	0	0
chr8	60652212	60652212	0.001519	rs686852	n200	1	a	0.5377	0.989613	8.51198e-05	no	no	1	1	0	0
chr8	60652088	60652088	0.001718	rs687351	n200	1	a	0.4619	0.989764	7.54245e-05	no	no	1	1	0	0
chr7	41028974	41028974	1.075e-10	rs78503047	n21	1	t	0.0242	0.205361	0.0653763	no	no	1	1	1	1
chr13	73598296	73598296	1.51183e-10	rs9543410	n26	1	T	0.4343	0.981937	0.00291495	no	no	0	1	0	0
chr13	72953813	72953813	4.34696e-09	rs9530120	n26	2	A	0.8365	0.351651	0.013429	no	no	1	0	0	0
chr13	72851384	72851384	6.37115e-09	rs76917254	n26	2	T	0.1635	0.555059	0.00926152	no	no	1	0	0	0
chr13	73142489	73142489	1.78592e-08	rs4242949	n26	2	A	0.8067	0.872948	0.00325127	no	no	1	0	0	0
chr13	73142180	73142180	1.7939e-08	rs1108921	n26	2	T	0.193	0.87619	0.00324247	no	no	1	0	0	0
chr13	72953863	72953863	1.32896e-07	rs9530121	n26	2	A	0.8479	0.98341	0.0005126	no	no	1	0	0	0
chr13	110366931	110366931	1.557e-13	rs9559781	n27	1	a	0.4005	0.505475	0.0476429	yes	yes	0	1	0	1
chr13	110367115	110367115	1.705e-13	rs4773169	n27	1	a	0.5994	0.639076	0.0439944	yes	yes	0	1	0	1
chr13	110367125	110367125	1.86e-13	rs9555694	n27	1	t	0.5994	0.721234	0.04063	yes	yes	0	1	0	1
chr13	110366736	110366736	2.014e-13	rs9555692	n27	1	t	0.5993	0.79547	0.036982	yes	yes	0	1	0	1
chr13	110367161	110367161	2.257e-13	rs4773170	n27	1	t	0.4006	0.862995	0.0335149	yes	yes	0	1	0	1
chr2	102520100	102520100	9.484e-14	rs17027341	n28	1	t	0.8587	0.269374	0.0293099	no	yes	1	0	1	0
chr19	19367068	19367068	5.62478e-13	rs56255430	n29	1	A	0.9181	0.374086	0.374086	no	yes	1	1	1	1
chr19	18479133	18479133	1.3734e-10	rs11670056	n29	2	T	0.0754	0.53519	0.53519	no	yes	0	1	0	1
chr19	18275253	18275253	1.63045e-09	rs10416600	n29	3	A	0.6361	0.478085	0.0518226	no	yes	1	1	1	1
chr19	18282063	18282063	1.21409e-08	rs7247222	n29	3	A	0.6358	0.962784	0.00747249	no	yes	1	0	0	0
chr1	43241437	43241437	4.707e-12	rs2991340	n31	1	a	0.4152	0.465411	0.0696273	no	yes	1	0	1	0
chr1	43265670	43265670	5.843e-12	rs1198978	n31	1	a	0.5844	0.77019	0.0562772	no	yes	1	0	1	0
chr11	10122805	10122805	3.283e-13	rs79175090	n32	1	T	0.0568	0.414708	0.00868915	yes	no	0	1	0	0
chr11	10123033	10123033	5.45049e-13	rs75264274	n32	1	A	0.0568	0.54097	0.00531701	yes	no	0	1	0	0
chr11	10020318	10020318	1.25881e-12	rs78714142	n32	1	C	0.9406	0.874741	0.00235891	yes	no	1	0	0	0
chr11	10208126	10208126	1.53196e-12	rs78074949	n32	1	A	0.94	0.93647	0.00194511	yes	no	1	0	0	0
chr11	10450517	10450517	1.1333e-05	rs7938316	n32	2	T	0.3988	0.927696	0.000651335	yes	no	0	1	0	0
chr7	113710616	113710616	1.475e-11	rs12532997	n33	1	t	0.4533	0.351587	0.0215345	no	yes	1	0	0	0
chr7	113710306	113710306	1.734e-11	rs10953737	n33	1	t	0.5467	0.510272	0.018598	no	yes	1	0	0	0
chr7	113730581	113730581	2.466e-11	rs13228225	n33	1	t	0.5644	0.716326	0.0132346	no	yes	0	1	0	0
chr18	45155732	45155732	3.684e-12	rs35220808	n34	1	a	0.4007	0.988043	0.000757951	no	yes	0	1	0	0
chr1	183080657	183080657	9.225e-12	rs10911228	n36	1	t	0.5893	0.355549	0.0244315	yes	yes	0	1	0	0
chr1	183040142	183040142	1.298e-11	rs10911205	n36	1	a	0.4109	0.774889	0.0175946	yes	yes	0	1	0	0
chr1	183125667	183125667	5.32e-11	rs10797850	n36	1	a	0.4287	0.979939	0.00437517	yes	yes	1	0	0	0
chr4	128601363	128601363	6.01875e-11	rs904477	n37	1	A	0.3267	0.99435	0.00903363	no	yes	1	1	0	0
chr4	127416256	127416256	5.09938e-08	rs2034077	n37	2	A	0.4614	0.988281	0.000268332	no	yes	1	0	0	0
chr20	41340067	41340067	1.738e-10	rs4810312	n38	1	c	0.5802	0.498724	0.054738	no	yes	1	1	1	1
chr20	41005726	41005726	9.963e-10	rs1000410	n38	1	c	0.5603	0.782357	0.00979246	no	yes	1	1	0	0
chr20	41250316	41250316	3.548e-09	rs6016534	n38	1	t	0.4798	0.929841	0.00281166	no	yes	0	1	0	0
chr20	41249980	41249980	3.676e-09	rs6029588	n38	1	a	0.5201	0.932592	0.00275108	no	yes	0	1	0	0
chr20	41126055	41126055	5.105e-09	rs6029549	n38	1	c	0.5224	0.978502	0.00200621	no	yes	1	0	0	0
chr19	40268917	40268917	9.4e-11	rs62107590	n40	1	a	0.1495	0.770257	0.0219519	yes	no	1	0	0	0
chr2	136384930	136384930	1.04e-08	rs867563	n41	1	a	0.7303	0.824176	0.0129769	yes	yes	1	0	0	0
chr2	136385057	136385057	1.383e-08	rs11674348	n41	1	t	0.728	0.857144	0.00990088	yes	yes	1	0	0	0
chr2	229921377	229921377	1.05e-10	rs34360232	n42	1	t	0.3249	0.922055	0.00546556	no	no	0	1	0	0
chr2	229922345	229922345	2.115e-10	rs12993164	n42	1	t	0.3248	0.985336	0.00276025	no	no	1	1	0	0
chr14	31258485	31258485	1.269e-09	rs7156178	n43	1	t	0.4141	0.984848	0.0011446	yes	yes	1	0	0	0
chr14	31258122	31258122	1.746e-09	rs11156660	n43	1	a	0.5854	0.988572	0.000834235	yes	yes	1	0	0	0
chr19	38769830	38769830	6.733e-10	rs1966961	n44	1	a	0.4307	0.813285	0.0260594	no	yes	1	1	1	1
chr19	38769949	38769949	1.407e-09	rs1966962	n44	1	c	0.4313	0.897857	0.0122467	no	yes	1	1	0	0
chr19	38769904	38769904	1.514e-09	rs4547457	n44	1	a	0.5687	0.92052	0.0112581	no	yes	1	1	0	0
chr19	38770042	38770042	1.702e-09	rs9304579	n44	1	a	0.4318	0.930568	0.0100476	no	yes	1	1	0	0
chr19	38770062	38770062	1.81e-09	rs9304580	n44	1	c	0.4319	0.939976	0.00940842	no	yes	1	1	0	0
chr11	8021893	8021893	2.992e-12	rs11041713	n45	1	t	0.1325	0.811567	0.0526868	yes	yes	1	0	1	0
chr11	8021865	8021865	5.146e-12	rs141100072	n45	1	a	0.1324	0.968359	0.0313254	yes	yes	1	0	1	0
chr1	26695422	26695422	4.44809e-12	rs114165349	n46	1	C	0.0261	0.0359393	0.0359393	no	no	1	1	1	1
chr1	26890178	26890178	1.76902e-11	rs11555809	n46	1	A	0.0827	0.30907	0.00875801	no	no	1	1	0	0
chr1	26966865	26966865	2.18095e-11	rs17162387	n46	1	T	0.915	0.525269	0.00714161	no	no	1	1	0	0
chr1	26744038	26744038	2.5165e-11	rs58421016	n46	1	T	0.9143	0.697859	0.00618695	no	no	1	1	0	0
chr1	26921792	26921792	2.54695e-11	rs11538549	n46	1	C	0.9152	0.704003	0.00614369	no	no	1	1	0	0
chr1	26787956	26787956	2.67181e-11	rs71636780	n46	1	A	0.0842	0.745735	0.00584319	no	no	1	1	0	0
chr1	26771828	26771828	3.0883e-11	rs34618114	n46	1	A	0.0842	0.832219	0.00507294	no	no	0	1	0	0
chr1	26849628	26849628	3.76829e-11	rs17162313	n46	1	A	0.9146	0.915536	0.00419135	no	no	1	1	0	0
chr1	26688257	26688257	4.50852e-11	rs12754468	n46	1	C	0.9122	0.973132	0.00348384	no	no	0	1	0	0
chr1	26693253	26693253	4.67258e-11	rs12738345	n46	1	T	0.9136	0.976522	0.0033899	no	no	1	1	0	0
chr1	27392588	27392588	3.99068e-08	rs115072736	n46	2	A	0.9129	0.686675	0.00811892	no	no	1	1	0	0
chr1	27429047	27429047	4.0403e-08	rs74061798	n46	2	A	0.9128	0.694685	0.00800982	no	no	1	0	0	0
chr1	27392450	27392450	8.18639e-08	rs2504785	n46	2	A	0.9133	0.923878	0.00435219	no	no	1	1	0	0
chr1	27383368	27383368	1.28766e-07	rs734725	n46	2	T	0.0867	0.973539	0.00264029	no	no	1	0	0	0
chr12	53659462	53659462	3.4032e-11	rs10876477	n47	1	T	0.1612	0.817771	0.0608287	no	yes	1	0	1	0
chr12	53649356	53649356	3.43384e-10	rs10876474	n47	1	A	0.1636	0.944441	0.0061	no	yes	1	0	0	0
chr12	52970449	52970449	4.93713e-09	rs2682327	n47	2	A	0.3897	0.803234	0.106738	no	yes	1	0	1	0
chr12	52970230	52970230	1.70807e-08	rs7306790	n47	2	A	0.5728	0.866561	0.0315105	no	yes	1	0	1	0
chr12	52954179	52954179	3.9442e-08	rs10783551	n47	2	A	0.4549	0.970677	0.0142661	no	yes	0	1	0	0
chr12	52954119	52954119	1.88109e-07	rs10783549	n47	2	T	0.514	0.992236	0.0030999	no	yes	0	1	0	0
chr17	48048754	48048754	5.311e-11	rs12602010	n50	1	a	0.242	0.1494	0.0702863	yes	yes	0	1	0	1
chr17	48154418	48154418	9.006e-11	rs35371915	n50	1	t	0.2425	0.340023	0.041957	yes	yes	1	0	1	0
chr17	48160914	48160914	9.804e-11	rs11079812	n50	1	a	0.7575	0.461856	0.0392518	yes	yes	1	0	1	0
chr17	47905431	47905431	1.748e-10	rs1108833	n50	1	a	0.342	0.760967	0.0204765	yes	yes	1	0	0	0
chr17	48131431	48131431	4.888e-10	rs12601412	n50	1	a	0.7556	0.984965	0.00820987	yes	yes	1	0	0	0
chr7	56093284	56093284	3.101e-08	rs7801467	n53	1	a	0.2924	0.898185	0.0041585	no	no	1	1	0	0
chr7	56029572	56029572	4.247e-08	rs4948102	n53	1	c	0.2494	0.934997	0.0032691	no	no	1	0	0	0
chr2	101113631	101113631	5.37e-12	rs67087164	n54	1	t	0.8454	0.140325	0.0503438	yes	yes	0	1	0	1
chr2	101083860	101083860	7.268e-12	rs55674587	n54	1	t	0.1632	0.256008	0.0367294	yes	yes	0	1	0	1
chr2	101064213	101064213	8.718e-12	rs13426867	n54	1	a	0.1623	0.351688	0.0308148	yes	yes	0	1	0	1
chr12	50504945	50504945	1.078e-10	rs61927768	n55	1	a	0.3004	0.419234	0.123557	no	yes	1	1	1	1
chr12	50764080	50764080	3.455e-09	rs61926301	n55	1	t	0.397	0.778887	0.00399059	no	yes	1	1	0	0
chr12	50283723	50283723	2.678e-08	rs10876015	n55	1	t	0.66	0.949953	0.000563987	no	yes	1	1	0	0
chr12	50243157	50243157	3.449e-08	rs17124562	n55	1	t	0.6601	0.980995	0.000438263	no	yes	0	1	0	0
chr12	49873552	49873552	4.662e-08	rs836968	n55	1	t	0.2751	0.988643	0.000352914	no	yes	1	0	0	0
chr1	67540468	67540468	3.79756e-09	rs11209108	n56	2	T	0.257	0.210016	0.0957482	yes	yes	1	0	1	0
chr1	67535735	67535735	2.29869e-08	rs6702973	n56	2	A	0.7657	0.955772	0.0172963	yes	yes	1	0	0	0
chr1	116472496	116472496	2.514e-09	rs12078697	n57	1	c	0.2113	0.671425	0.0425501	yes	yes	0	1	0	1
chr1	116475281	116475281	3.136e-09	rs12087024	n57	1	t	0.2262	0.854361	0.0340026	yes	yes	1	1	1	1
chr1	116472877	116472877	1.003e-08	rs12406751	n57	1	a	0.1968	0.981675	0.0113759	yes	yes	0	1	0	0
chr3	154121676	154121676	1.752e-09	rs1727887	n60	1	t	0.8576	0.873225	0.00374984	yes	yes	0	1	0	0
chr3	154081333	154081333	3.332e-09	rs1713804	n60	1	a	0.1424	0.948968	0.00207057	yes	yes	1	0	0	0
chr1	205575543	205575543	9.611e-09	rs6658336	n63	1	a	0.35	0.778366	0.128934	yes	yes	1	0	1	0
chr1	205508335	205508335	9.234e-07	rs4615904	n63	1	a	0.9088	0.988514	0.00241785	yes	yes	1	0	0	0
chr16	28846324	28846324	2.368e-09	rs7187776	n65	1	a	0.5938	0.0313425	0.0313425	no	no	1	1	1	1
chr16	28880144	28880144	6.248e-09	rs8055138	n65	1	t	0.3996	0.611922	0.0120674	no	no	1	1	0	0
chr16	28863226	28863226	6.648e-09	rs62037367	n65	1	c	0.6004	0.681897	0.0113621	no	no	1	0	0	0
chr16	28554346	28554346	2.344e-07	rs7191618	n65	1	c	0.5828	0.988821	0.000360335	no	no	1	0	0	0
chr7	150826391	150826391	1.1195e-08	rs10452847	n66	1	A	0.2086	0.963531	0.0042399	no	yes	1	0	0	0
chr7	150826309	150826309	1.21217e-08	rs10269643	n66	1	A	0.2086	0.975794	0.00392504	no	yes	1	0	0	0
chr7	151087737	151087737	9.97864e-08	rs6464124	n66	2	T	0.2932	0.768551	0.0200908	no	yes	1	1	0	0
chr7	151087426	151087426	1.06617e-07	rs13225215	n66	2	T	0.2936	0.787428	0.0188774	no	yes	1	0	0	0
chr7	151087320	151087320	1.73747e-07	rs13239507	n66	2	T	0.7067	0.844505	0.0117854	no	yes	1	1	0	0
chr7	150800408	150800408	8.98239e-07	rs115946508	n66	2	A	0.1108	0.981759	0.00340928	no	yes	1	0	0	0
chr7	151087925	151087925	1.01064e-06	rs6464125	n66	2	A	0.3091	0.98616	0.00216746	no	yes	0	1	0	0
chr1	2104824	2104824	5.61728e-10	rs10797413	n67	1	A	0.6089	0.544624	0.016858	no	yes	0	1	0	0
chr1	2140326	2140326	1.40178e-09	rs364677	n67	1	A	0.3816	0.796588	0.00688611	no	yes	0	1	0	0
chr1	2140117	2140117	3.94978e-09	rs436045	n67	1	A	0.2759	0.94574	0.00271071	no	yes	0	1	0	0
chr1	2232129	2232129	1.22915e-08	rs263533	n67	1	T	0.422	0.987307	0.00083003	no	yes	0	1	0	0
chr1	1944216	1944216	1.80576e-05	rs2803335	n67	2	T	0.4987	0.964046	0.000544374	no	yes	1	1	0	0
chr1	1944091	1944091	1.80939e-05	rs2803333	n67	2	C	0.4987	0.96459	0.000543489	no	yes	1	1	0	0
chr1	1944419	1944419	2.13932e-05	rs2803336	n67	2	C	0.5013	0.97098	0.000464537	no	yes	0	1	0	0
chr1	1944420	1944420	2.2385e-05	rs2803337	n67	2	A	0.5012	0.971872	0.000445152	no	yes	0	1	0	0
chr1	1944074	1944074	2.40619e-05	rs2803332	n67	2	T	0.5014	0.975329	0.000414662	no	yes	1	1	0	0
chr1	1944182	1944182	2.80612e-05	rs2803334	n67	2	C	0.5	0.980716	0.000358427	no	yes	1	1	0	0
chr1	1782430	1782430	3.70009e-05	rs7534617	n67	2	T	0.7286	0.984711	0.000298875	no	yes	1	1	0	0
chr7	26542700	26542700	8.808e-10	rs10245341	n68	1	a	0.3998	0.454483	0.0687282	yes	yes	0	1	0	1
chr7	26542913	26542913	1.547e-09	rs6976270	n68	1	t	0.3999	0.547111	0.0394963	yes	yes	0	1	0	1
chr7	26542856	26542856	1.647e-09	rs10262030	n68	1	a	0.6001	0.584921	0.0378107	yes	yes	0	1	0	1
chr7	26542897	26542897	2.727e-09	rs10232785	n68	1	t	0.3998	0.924811	0.0227495	yes	yes	0	1	0	0
chr7	26542829	26542829	9.653e-09	rs10232690	n68	1	t	0.3959	0.980858	0.00729604	yes	yes	0	1	0	0
chr7	26542816	26542816	1.301e-08	rs10232686	n68	1	t	0.396	0.993347	0.00544809	yes	yes	0	1	0	0
chr17	81636805	81636805	2.325e-09	rs9895741	n70	1	a	0.3579	0.945124	0.00600831	yes	yes	0	1	0	0
chr14	102527728	102527728	8.396e-10	rs4900538	n71	1	t	0.3614	0.380502	0.166275	yes	yes	0	1	0	1
chr14	102508662	102508662	2.033e-09	rs2273905	n71	1	t	0.3574	0.720086	0.0689813	yes	yes	0	1	0	1
chr1	28233183	28233183	2.659e-10	rs474597	n73	1	a	0.7092	0.23474	0.0234267	no	no	1	1	0	0
chr1	28243838	28243838	2.925e-10	rs534121	n73	1	a	0.2959	0.413849	0.0214137	no	no	0	1	0	0
chr1	28236029	28236029	3.42e-10	rs476843	n73	1	a	0.2909	0.535884	0.0183182	no	no	1	1	0	0
chr1	28236165	28236165	3.405e-10	rs12154	n73	1	a	0.709	0.554053	0.0181696	no	no	1	1	0	0
chr1	28247532	28247532	3.597e-10	rs515437	n73	1	a	0.2914	0.624497	0.0174472	no	no	1	1	0	0
chr1	28247324	28247324	3.746e-10	rs492554	n73	1	t	0.2911	0.674946	0.0166802	no	no	1	1	0	0
chr1	28233063	28233063	4.788e-10	rs510803	n73	1	c	0.7094	0.792307	0.013028	no	no	1	1	0	0
chr1	28197194	28197194	1.684e-09	rs788634	n73	1	a	0.2969	0.958385	0.00381956	no	no	1	1	0	0
chr1	28183819	28183819	1.789e-09	rs11247759	n73	1	a	0.703	0.96207	0.00368475	no	no	0	1	0	0
chr2	158954179	158954179	2.812e-09	rs7565830	n74	1	a	0.7246	0.170338	0.170338	yes	yes	1	1	1	1
chr2	158984834	158984834	6.738e-07	rs1719078	n74	1	t	0.6337	0.988867	0.000797558	yes	yes	1	0	0	0
chr14	53953591	53953591	1.38142e-10	rs2761882	n76	1	T	0.4993	0.98815	0.00607544	yes	yes	1	1	0	0
chr14	53953247	53953247	2.29471e-10	rs2855532	n76	1	A	0.4594	0.991603	0.00345281	yes	yes	0	1	0	0
chr14	54182602	54182602	1.06948e-07	rs75594555	n76	2	T	0.9511	0.33273	0.0206287	yes	yes	0	1	0	0
chr10	129502012	129502012	3.228e-08	rs12762266	n77	1	t	0.708	0.946547	0.00290782	no	yes	1	0	0	0
chr10	129546149	129546149	7.454e-08	rs10829605	n77	1	t	0.6174	0.974326	0.00123394	no	yes	1	0	0	0
chr10	129569104	129569104	1.371e-07	rs10466114	n77	1	t	0.302	0.987505	0.000722521	no	yes	1	0	0	0
chr12	111569952	111569952	5.454e-08	rs653178	n79	1	t	0.5227	0.0803866	0.0385062	yes	yes	0	1	0	1
chr12	112012950	112012950	5.371e-07	rs11066128	n79	1	t	0.903	0.201704	0.00660184	yes	yes	0	1	0	0
chr12	112006156	112006156	6.64e-07	rs7310545	n79	1	a	0.097	0.25429	0.00539266	yes	yes	1	1	0	0
chr12	112006305	112006305	6.659e-07	rs7296841	n79	1	a	0.903	0.265019	0.00536254	yes	yes	1	1	0	0
chr12	112014458	112014458	6.9e-07	rs1880871	n79	1	t	0.903	0.322515	0.00516271	yes	yes	0	1	0	0
chr12	112418839	112418839	1.934e-06	rs58805176	n79	1	a	0.085	0.63174	0.00204881	yes	yes	1	1	0	0
chr12	112347778	112347778	3.932e-06	rs60258199	n79	1	t	0.9029	0.8768	0.000987072	yes	yes	0	1	0	0
chr12	111842969	111842969	3.304e-06	rs3213628	n79	1	t	0.1762	0.885493	0.000941425	yes	yes	0	1	0	0
chr12	112382690	112382690	5.457e-06	rs12423788	n79	1	t	0.0861	0.907002	0.000757779	yes	yes	1	1	0	0
chr12	111788123	111788123	8.547e-06	rs10774637	n79	1	t	0.1762	0.957577	0.000379008	yes	yes	1	0	0	0
chr12	111807366	111807366	1.432e-05	rs11066028	n79	1	a	0.7174	0.978745	0.000201673	yes	yes	1	0	0	0
chr12	112347767	112347767	2.878e-05	rs10850033	n79	1	t	0.8969	0.985935	0.000148807	yes	yes	0	1	0	0
chr12	111446611	111446611	2.316e-05	rs28362508	n79	1	t	0.7913	0.986795	0.000139077	yes	yes	1	0	0	0
chr3	132507973	132507973	8.24799e-07	rs2369802	n80	2	A	0.4664	0.96072	0.00258327	no	yes	1	1	0	0
chr3	132536440	132536440	2.74893e-06	rs2061196	n80	2	A	0.5458	0.985464	0.000816237	no	yes	1	0	0	0
chr15	78709357	78709357	3.67e-09	rs12899940	n81	1	t	0.7503	0.507867	0.0229273	yes	yes	1	1	0	0
chr15	78740402	78740402	7.092e-09	rs2017091	n81	1	a	0.75	0.676262	0.0126575	yes	yes	1	0	0	0
chr15	78754647	78754647	8.271e-09	rs12906835	n81	1	a	0.2551	0.755102	0.0108394	yes	yes	0	1	0	0
chr15	78738184	78738184	1.177e-08	rs11856441	n81	1	t	0.2488	0.822672	0.00770637	yes	yes	1	1	0	0
chr15	78751333	78751333	1.518e-08	rs4887092	n81	1	t	0.2548	0.940274	0.00597627	yes	yes	1	1	0	0
chr15	78751238	78751238	2.215e-08	rs4887091	n81	1	t	0.2556	0.955361	0.00414935	yes	yes	1	1	0	0
chr15	78755093	78755093	1.283e-07	rs12439049	n81	1	t	0.8043	0.981874	0.000836945	yes	yes	0	1	0	0
chr15	78740676	78740676	1.35e-07	rs2869571	n81	1	a	0.2158	0.986594	0.000766727	yes	yes	1	0	0	0
chr2	46306413	46306413	3.985e-08	rs11684885	n84	1	t	0.412	0.935334	0.0211686	yes	yes	1	1	0	0
chr2	46298957	46298957	1.342e-07	rs10211665	n84	1	t	0.4108	0.974615	0.00668156	yes	yes	0	1	0	0
chr4	40418691	40418691	1.08758e-11	rs278941	n86	1	A	0.7179	0.434278	0.434278	yes	yes	1	1	1	1
chr4	40418420	40418420	1.25773e-11	rs166775	n86	1	T	0.7188	0.813906	0.379628	yes	yes	0	1	0	1
chr4	40419551	40419551	4.30546e-11	rs278937	n86	1	T	0.7133	0.92781	0.113905	yes	yes	1	0	1	0
chr4	40418735	40418735	1.48187e-09	rs278940	n86	1	A	0.3454	0.992839	0.00346864	yes	yes	1	1	0	0
chr3	195908122	195908122	8.882e-11	rs13059257	n87	1	t	0.0294	0.30501	0.30501	yes	yes	0	1	0	1
chr3	195897522	195897522	2.615e-10	rs71321863	n87	1	a	0.0289	0.657444	0.109075	yes	yes	0	1	0	1
chr3	195896378	195896378	5.226e-10	rs112638966	n87	1	t	0.9688	0.929757	0.0566532	yes	yes	0	1	0	1
chr11	128467540	128467540	1.259e-07	rs11221318	n88	1	t	0.4108	0.971829	0.00314724	yes	no	0	1	0	0
chr20	44407812	44407812	9.686e-09	rs8114057	n89	1	a	0.4626	0.989941	0.0123141	no	yes	1	1	0	0
chr2	134846389	134846389	1.394e-07	rs10928519	n92	1	t	0.4142	0.642607	0.00444751	no	no	1	0	0	0
chr2	134846120	134846120	1.446e-07	rs1942051	n92	1	a	0.5859	0.646929	0.00432199	no	no	0	1	0	0
chr2	134670484	134670484	1.847e-07	rs11898084	n92	1	t	0.3394	0.753697	0.00354444	no	no	1	0	0	0
chr2	134840058	134840058	2.722e-07	rs10496731	n92	1	t	0.614	0.908768	0.00235749	no	no	1	1	0	0
chr2	134846613	134846613	2.811e-07	rs10928520	n92	1	t	0.6154	0.911081	0.00231285	no	no	1	0	0	0
chr13	95404434	95404434	3.045e-09	rs12858132	n93	1	t	0.8197	0.957393	0.0279522	yes	yes	1	1	1	1
chr8	101657765	101657765	5.152e-10	rs13271310	n94	1	a	0.4042	0.356554	0.0562704	no	yes	0	1	0	1
chr20	3204667	3204667	6.539e-06	rs11699145	n95	1	a	0.1342	0.972762	0.000689011	no	yes	1	1	0	0
chr20	3203925	3203925	1.07e-05	rs11697114	n95	1	t	0.8656	0.980042	0.000434817	no	yes	0	1	0	0
chr4	53476491	53476491	3.143e-08	rs6855607	n96	1	t	0.1449	0.676541	0.019729	no	yes	0	1	0	0
chr4	53497582	53497582	1.107e-07	rs62323593	n96	1	a	0.145	0.919567	0.0059305	no	yes	1	0	0	0
chr13	27183768	27183768	1.012e-09	rs2281979	n97	1	t	0.0759	0.356988	0.034257	yes	no	1	0	1	0
chr13	27251238	27251238	2.009e-09	rs3094294	n97	1	t	0.9222	0.739437	0.017837	yes	no	1	1	0	0
chr13	27183238	27183238	2.285e-09	rs7999846	n97	1	t	0.075	0.936206	0.0157842	yes	no	1	1	0	0
chr13	27251616	27251616	1.203e-08	rs3118727	n97	1	c	0.9111	0.990515	0.00305829	yes	no	0	1	0	0
chr9	134068323	134068323	1.41e-07	rs75318400	n98	1	t	0.6653	0.0662291	0.0321348	no	no	1	0	1	0
chr9	134065772	134065772	4.017e-06	rs2506715	n98	1	a	0.3058	0.98058	0.00130202	no	no	0	1	0	0
chr9	134068760	134068760	5.047e-06	rs2905066	n98	1	t	0.3057	0.983932	0.00104112	no	no	0	1	0	0
chr8	109082983	109082983	3.263e-07	rs3134103	n99	1	a	0.3968	0.861774	0.0129091	no	no	0	1	0	0
chr8	109025695	109025695	8.151e-06	rs4464938	n99	1	a	0.5654	0.971155	0.000586853	no	no	0	1	0	0
chr8	109025829	109025829	8.589e-06	rs4236798	n99	1	t	0.4346	0.975691	0.000555034	no	no	0	1	0	0
chr8	109025555	109025555	8.693e-06	rs4442116	n99	1	a	0.5655	0.976797	0.000551228	no	no	0	1	0	0
chr8	109022781	109022781	1.319e-05	rs6469217	n99	1	t	0.5651	0.988886	0.00037126	no	no	0	1	0	0

## Sheet: Supplementary Table_6
Supplementary Table 6: CADD variants
MarkerName: combination of chromosome, position of the variant and allele alteration; Chrom: chromosome; Pos: position at declared chromosome; Ref: Reference allele; Alt: alternative allele;
SNV: Single nucleotide variant;;PHRED: quality score for identification of nucleobases generated by automated DNA sequencing; Locus_id: ID of the correponding locus ('n' for novel, 'k' for known; RSID: Reference SNP ID
MarkerName	Chrom	Pos	Ref	Alt	Type	Consequence	ConsScore	ConsDetail	oAA	nAA	GeneID	FeatureID	GeneName	protPos	PHRED	Locus_id	RSID
15:45444133:C_T	15	45444133	T	C	SNV	NON_SYNONYMOUS	7	missense	C	R	ENSG00000137857	ENST00000321429	DUOX1	1026	20.2	k1.3	rs16939752
15:45449653:C_T	15	45449653	C	T	SNV	INTRONIC	2	intron			ENSG00000137857	ENST00000321429	DUOX1		15.72	k1.3	rs1648318
12:48744199:A_C	12	48744199	C	A	SNV	5PRIME_UTR	3	5_prime_UTR			ENSG00000167528	ENST00000544117	ZNF641		15.84	k100.1	rs2732439
1:100818178:C_G	1	100818178	G	C	SNV	5PRIME_UTR	3	5_prime_UTR			ENSG00000079335	ENST00000361544	CDC14A		20.2	k102.1	rs529224
1:100818728:G_T	1	100818728	T	G	SNV	INTRONIC	2	intron			ENSG00000079335	ENST00000361544	CDC14A		16.17	k102.1	rs17420882
2:54578310:A_T	2	54578310	A	T	SNV	INTRONIC	2	intron			ENSG00000177994	ENST00000398634	C2orf73		15.51	k104.2	rs10165083
2:54587596:C_T	2	54587596	C	T	SNV	NON_SYNONYMOUS	7	missense	P	L	ENSG00000177994	ENST00000398634	C2orf73	254	19.63	k104.2	rs2280718
15:99270441:C_T	15	99270441	T	C	SNV	INTRONIC	2	intron			ENSG00000140443	ENST00000268035	IGF1R		18.22	k109.1	rs55686521
6:160543148:C_T	6	160543148	C	T	SNV	NON_SYNONYMOUS	7	missense	R	C	ENSG00000175003	ENST00000366963	SLC22A1	61	23.3	k11.10	rs12208357
6:160543148:C_T	6	160543148	C	T	SNV	NON_SYNONYMOUS	7	missense	R	C	ENSG00000175003	ENST00000366963	SLC22A1	61	23.3	k11.9	rs12208357
6:160543148:C_T	6	160543148	C	T	SNV	NON_SYNONYMOUS	7	missense	R	C	ENSG00000175003	ENST00000366963	SLC22A1	61	23.3	k11.8	rs12208357
6:160543148:C_T	6	160543148	C	T	SNV	NON_SYNONYMOUS	7	missense	R	C	ENSG00000175003	ENST00000366963	SLC22A1	61	23.3	k11.7	rs12208357
6:160543148:C_T	6	160543148	C	T	SNV	NON_SYNONYMOUS	7	missense	R	C	ENSG00000175003	ENST00000366963	SLC22A1	61	23.3	k11.4	rs12208357
6:160952838:A_G	6	160952838	G	A	SNV	NON_SYNONYMOUS	7	missense	R	C	ENSG00000198670	ENST00000447678	LPA	2016	17.45	k11.10	rs3124784
6:160952838:A_G	6	160952838	G	A	SNV	NON_SYNONYMOUS	7	missense	R	C	ENSG00000198670	ENST00000447678	LPA	2016	17.45	k11.9	rs3124784
6:160952838:A_G	6	160952838	G	A	SNV	NON_SYNONYMOUS	7	missense	R	C	ENSG00000198670	ENST00000447678	LPA	2016	17.45	k11.6	rs3124784
3:49394834:A_G	3	49394834	G	A	SNV	NON_SYNONYMOUS	7	missense	P	L	ENSG00000233276	ENST00000419783	GPX1	200	19.22	k110.1	rs1050450
3:49572140:A_G	3	49572140	A	G	SNV	3PRIME_UTR	2	3_prime_UTR			ENSG00000173402	ENST00000545947	DAG1		16.19	k110.1	rs4625
3:52593138:A_G	3	52593138	A	G	SNV	INTRONIC	2	intron			ENSG00000163939	ENST00000394830	PBRM1		15.14	k110.2	rs17052259
3:52949254:A_G	3	52949254	A	G	SNV	INTRONIC	2	intron			ENSG00000163935	ENST00000394752	SFMBT1		18.67	k110.3	rs11708337
3:52963668:A_C	3	52963668	A	C	SNV	INTRONIC	2	intron			ENSG00000163935	ENST00000394752	SFMBT1		16.55	k110.3	rs11718834
3:53073314:A_C	3	53073314	C	A	SNV	INTRONIC	2	intron			ENSG00000163935	ENST00000394752	SFMBT1		15.65	k110.3	rs71301804
3:48470756:C_T	3	48470756	T	C	SNV	5PRIME_UTR	3	5_prime_UTR			ENSG00000164050	ENST00000358536	PLXNB1		17.09	k110.4	rs9817615
17:66449122:A_G	17	66449122	G	A	SNV	NON_SYNONYMOUS	7	missense	T	I	ENSG00000070540	ENST00000262139	WIPI1	31	21.5	k113.1	rs883541
3:63919876:C_T	3	63919876	T	C	SNV	INTRONIC	2	intron			ENSG00000163635	ENST00000398590	ATXN7		19.33	k115.1	rs3774715
3:135808620:G_T	3	135808620	T	G	SNV	INTRONIC	2	intron			ENSG00000073711	ENST00000264977	PPP2R3A		15.97	k120.1	rs9834966
2:264019:A_C	2	264019	C	A	SNV	5PRIME_UTR	3	5_prime_UTR			ENSG00000035115	ENST00000356150	SH3YL1		17.82	k122.1	rs7595075
2:272203:C_T	2	272203	C	T	SNV	SYNONYMOUS	5	synonymous	D	D	ENSG00000143727	ENST00000272067	ACP1	43	15.02	k122.1	rs11553746
2:277003:A_G	2	277003	A	G	SNV	NON_SYNONYMOUS	7	missense	Q	R	ENSG00000143727	ENST00000272067	ACP1	106	18.33	k122.1	rs79716074
1:171514731:C_G	1	171514731	C	G	SNV	NON_SYNONYMOUS	7	missense	S	C	ENSG00000117523	ENST00000338920	PRRC2C	1624	21.6	k123.1	rs235468
1:171558516:C_T	1	171558516	C	T	SNV	INTRONIC	2	intron			ENSG00000117523	ENST00000338920	PRRC2C		19.03	k123.1	rs235503
1:172368310:A_G	1	172368310	A	G	SNV	INTRONIC	2	intron			ENSG00000197959	ENST00000358155	DNM3		16.11	k123.3	rs7546252
1:172368310:A_G	1	172368310	A	G	SNV	INTRONIC	2	intron			ENSG00000197959	ENST00000358155	DNM3		16.11	k123.4	rs7546252
1:172105257:C_T	1	172105257	T	C	SNV	INTRONIC	2	intron			ENSG00000197959	ENST00000358155	DNM3		16.29	k123.4	rs17277015
1:172137134:A_T	1	172137134	A	T	SNV	INTRONIC	2	intron			ENSG00000197959	ENST00000358155	DNM3		17.28	k123.4	rs17277127
14:88862529:A_G	14	88862529	G	A	SNV	NON_SYNONYMOUS	7	missense	V	M	ENSG00000042317	ENST00000393545	SPATA7	74	16.05	k125.1	rs3179969
14:88938652:A_G	14	88938652	A	G	SNV	NON_SYNONYMOUS	7	missense	V	A	ENSG00000070778	ENST00000556564	PTPN21	936	16.87	k125.1	rs2274736
17:34900847:A_C	17	34900847	A	C	SNV	5PRIME_UTR	3	5_prime_UTR			ENSG00000005955	ENST00000304718	GGNBP2		19.37	k127.1	rs3736167
6:51497503:A_C	6	51497503	C	A	SNV	NON_SYNONYMOUS	7	missense	R	L	ENSG00000170927	ENST00000371117	PKHD1	3842	23.8	k128.4	rs76572975
6:51497503:A_C	6	51497503	C	A	SNV	NON_SYNONYMOUS	7	missense	R	L	ENSG00000170927	ENST00000371117	PKHD1	3842	23.8	k128.1	rs76572975
6:51497503:A_C	6	51497503	C	A	SNV	NON_SYNONYMOUS	7	missense	R	L	ENSG00000170927	ENST00000371117	PKHD1	3842	23.8	k128.2	rs76572975
6:51688362:A_G	6	51688362	G	A	SNV	INTRONIC	2	intron			ENSG00000170927	ENST00000371117	PKHD1		15.95	k128.3	rs9463719
6:51697658:C_T	6	51697658	T	C	SNV	INTRONIC	2	intron			ENSG00000170927	ENST00000371117	PKHD1		16.75	k128.3	rs9463725
6:50789176:A_G	6	50789176	G	A	SNV	INTRONIC	2	intron			ENSG00000008196	ENST00000393655	TFAP2B		17.14	k128.4	rs2817377
6:50789451:C_T	6	50789451	T	C	SNV	INTRONIC	2	intron			ENSG00000008196	ENST00000393655	TFAP2B		21.8	k128.4	rs2076309
6:51637536:G_T	6	51637536	G	T	SNV	NON_SYNONYMOUS	7	missense	T	K	ENSG00000170927	ENST00000371117	PKHD1	2869	24.7	k128.4	rs142522748
22:30221826:A_T	22	30221826	T	A	SNV	INTRONIC	2	intron			ENSG00000100325	ENST00000397771	ASCC2		18.01	k129.1	rs9306465
22:30421066:A_G	22	30421066	A	G	SNV	INTRONIC	2	intron			ENSG00000100330	ENST00000401950	MTMR3		19.12	k129.1	rs41170
22:30888494:C_T	22	30888494	C	T	SNV	NON_SYNONYMOUS	7	missense	E	K	ENSG00000133488	ENST00000255858	SEC14L4	211	30	k129.2	rs17738527
22:30888527:C_T	22	30888527	C	T	SNV	NON_SYNONYMOUS	7	missense	V	M	ENSG00000133488	ENST00000255858	SEC14L4	200	22.6	k129.2	rs17738540
22:30953295:C_T	22	30953295	C	T	SNV	NON_SYNONYMOUS	7	missense	V	M	ENSG00000128242	ENST00000402321	GAL3ST1	29	19.42	k129.2	rs2267161
2:27839832:C_G	2	27839832	C	G	SNV	INTRONIC	2	intron			ENSG00000243943	ENST00000355467	ZNF512		19.8	k13.2	rs7571558
1:18807620:C_G	1	18807620	G	C	SNV	NON_SYNONYMOUS	7	missense	G	R	ENSG00000179023	ENST00000400664	KLHDC7A	49	21.8	k131.1	rs34109355
16:3586230:C_T	16	3586230	C	T	SNV	NON_SYNONYMOUS	7	missense	R	W	ENSG00000103351	ENST00000576634	CLUAP1	401	22.8	k133.1	rs9790
6:90121950:A_G	6	90121950	G	A	SNV	5PRIME_UTR	3	5_prime_UTR			ENSG00000025039	ENST00000369415	RRAGD		17.98	k134.2	rs854922
3:169097936:C_T	3	169097936	T	C	SNV	INTRONIC	2	intron			ENSG00000085276	ENST00000494292	MECOM		17.33	k137.1	rs16853605
3:169148465:G_T	3	169148465	G	T	SNV	INTRONIC	2	intron			ENSG00000085276	ENST00000494292	MECOM		18.08	k137.1	rs16853717
3:169150632:C_T	3	169150632	T	C	SNV	INTRONIC	2	intron			ENSG00000085276	ENST00000494292	MECOM		16.79	k137.1	rs16853722
3:169150797:C_T	3	169150797	C	T	SNV	INTRONIC	2	intron			ENSG00000085276	ENST00000494292	MECOM		15.82	k137.1	rs57900283
3:169167965:A_C	3	169167965	C	A	SNV	INTRONIC	2	intron			ENSG00000085276	ENST00000494292	MECOM		18.11	k137.1	rs16853761
1:207235954:A_G	1	207235954	G	A	SNV	INTRONIC	2	intron			ENSG00000123836	ENST00000367080	PFKFB2		21.4	k138.1	rs2075863
5:132388068:G_T	5	132388068	T	G	SNV	INTRONIC	2	intron			ENSG00000170606	ENST00000304858	HSPA4		15.45	k139.1	rs76836760
5:131596419:C_T	5	131596419	T	C	SNV	INTRONIC	2	intron			ENSG00000131435	ENST00000253754	PDLIM4		15.44	k139.2	rs10076701
5:131596419:C_T	5	131596419	T	C	SNV	INTRONIC	2	intron			ENSG00000131435	ENST00000253754	PDLIM4		15.44	k139.3	rs10076701
5:131800105:G_T	5	131800105	G	T	SNV	DOWNSTREAM	1	downstream			ENSG00000197536	ENST00000337752	IRF1-AS1		19.01	k139.2	rs2706339
5:131800105:G_T	5	131800105	G	T	SNV	DOWNSTREAM	1	downstream			ENSG00000197536	ENST00000337752	IRF1-AS1		19.01	k139.3	rs2706339
14:93118229:C_T	14	93118229	C	T	SNV	NON_SYNONYMOUS	7	missense	R	C	ENSG00000100599	ENST00000216487	RIN3	279	25.4	k141.1	rs117068593
7:127391852:A_G	7	127391852	A	G	SNV	INTRONIC	2	intron			ENSG00000197157	ENST00000354725	SND1		16.38	k142.1	rs1348103
7:127404987:A_G	7	127404987	G	A	SNV	INTRONIC	2	intron			ENSG00000197157	ENST00000354725	SND1		15.99	k142.1	rs6959487
7:127584722:C_T	7	127584722	C	T	SNV	INTRONIC	2	intron			ENSG00000197157	ENST00000354725	SND1		15.19	k142.1	rs12154492
1:78392446:A_G	1	78392446	G	A	SNV	NON_SYNONYMOUS	7	missense	G	R	ENSG00000162614	ENST00000334785	NEXN	245	31	k146.1	rs1166698
1:78536484:C_T	1	78536484	C	T	SNV	INTRONIC	2	intron			ENSG00000137960	ENST00000370759	GIPC2		15.36	k146.1	rs11162412
8:32345693:C_T	8	32345693	T	C	SNV	INTRONIC	2	intron			ENSG00000157168	ENST00000519301	NRG1		17.16	k148.1	rs7844698
8:32347247:C_G	8	32347247	G	C	SNV	INTRONIC	2	intron			ENSG00000157168	ENST00000519301	NRG1		16.98	k148.1	rs7001605
7:129586238:A_G	7	129586238	A	G	SNV	INTRONIC	2	intron			ENSG00000186591	ENST00000355621	UBE2H		15.2	k149.1	rs55767113
7:129663496:C_T	7	129663496	C	T	SNV	NON_SYNONYMOUS	7	missense	R	H	ENSG00000091732	ENST00000358303	ZC3HC1	363	27.5	k149.2	rs11556924
3:125854409:C_T	3	125854409	T	C	SNV	NON_SYNONYMOUS	7	missense	S	G	ENSG00000144908	ENST00000273450	ALDH1L1	491	20.7	k151.2	rs2276724
2:152352843:C_G	2	152352843	C	G	SNV	NON_SYNONYMOUS	7	missense	A	P	ENSG00000183091	ENST00000397345	NEB	8145	16.94	k156.1	rs7575451
11:78042983:A_C	11	78042983	A	C	SNV	INTRONIC	2	intron			ENSG00000033327	ENST00000361507	GAB2		15.35	k159.1	rs10899473
11:78127914:A_G	11	78127914	A	G	SNV	INTRONIC	2	intron			ENSG00000033327	ENST00000361507	GAB2		15.13	k159.1	rs869202
11:78128047:C_G	11	78128047	C	G	SNV	INTRONIC	2	intron			ENSG00000033327	ENST00000361507	GAB2		16.29	k159.1	rs881361
11:78204406:C_T	11	78204406	C	T	SNV	INTRONIC	2	intron			ENSG00000137513	ENST00000281038	NARS2		18.3	k159.1	rs4474466
2:40680149:G_T	2	40680149	T	G	SNV	INTRONIC	2	intron			ENSG00000183023	ENST00000403092	SLC8A1		17.72	k162.1	rs2301343
15:85361960:C_T	15	85361960	C	T	SNV	INTRONIC	2	intron			ENSG00000136383	ENST00000258888	ALPK3		19.21	k165.1	rs4633690
15:85361977:G_T	15	85361977	G	T	SNV	INTRONIC	2	intron			ENSG00000136383	ENST00000258888	ALPK3		19.03	k165.1	rs2879828
7:66212597:A_G	7	66212597	G	A	SNV	INTRONIC	2	intron			ENSG00000154710	ENST00000284957	RABGEF1		16.97	k167.1	rs2707854
17:17596751:C_G	17	17596751	G	C	SNV	INTRONIC	2	intron			ENSG00000108557	ENST00000353383	RAI1		19.87	k168.1	rs4925102
5:78324352:A_G	5	78324352	A	G	SNV	NON_SYNONYMOUS	7	missense	S	P	ENSG00000132837	ENST00000255189	DMGDH	646	18.78	k169.1	rs1805074
5:78326750:C_G	5	78326750	G	C	SNV	NON_SYNONYMOUS	7	missense	A	G	ENSG00000132837	ENST00000255189	DMGDH	530	22	k169.1	rs1805073
19:33353061:G_T	19	33353061	G	T	SNV	NON_SYNONYMOUS	7	missense	L	M	ENSG00000021488	ENST00000023064	SLC7A9	223	21.7	k17.2	rs1007160
19:33372814:A_G	19	33372814	G	A	SNV	NON_SYNONYMOUS	7	missense	R	W	ENSG00000121289	ENST00000305768	CEP89	691	22.6	k17.2	rs34626245
19:33397705:A_G	19	33397705	A	G	SNV	INTRONIC	2	intron			ENSG00000121289	ENST00000305768	CEP89		16.59	k17.2	rs61395248
16:71801958:C_T	16	71801958	T	C	SNV	INTRONIC	2	intron			ENSG00000166747	ENST00000393512	AP1G1		16.81	k170.1	rs7192956
2:233599904:A_C	2	233599904	A	C	SNV	5PRIME_UTR	3	5_prime_UTR			ENSG00000204120	ENST00000409451	GIGYF2		17.05	k171.1	rs11555646
2:233600606:A_G	2	233600606	A	G	SNV	INTRONIC	2	intron			ENSG00000204120	ENST00000409451	GIGYF2		18.84	k171.1	rs13013142
2:233654627:A_G	2	233654627	A	G	SNV	INTRONIC	2	intron			ENSG00000204120	ENST00000409451	GIGYF2		15.54	k171.1	rs283474
4:23810178:C_T	4	23810178	C	T	SNV	INTRONIC	2	intron			ENSG00000109819	ENST00000264867	PPARGC1A		19.04	k174.1	rs2970886
4:23818820:A_G	4	23818820	G	A	SNV	INTRONIC	2	intron			ENSG00000109819	ENST00000264867	PPARGC1A		18.23	k174.1	rs2932970
4:23818884:C_T	4	23818884	C	T	SNV	INTRONIC	2	intron			ENSG00000109819	ENST00000264867	PPARGC1A		20.3	k174.1	rs2932971
4:23822328:A_G	4	23822328	G	A	SNV	INTRONIC	2	intron			ENSG00000109819	ENST00000264867	PPARGC1A		21.4	k174.1	rs2932976
10:63724773:A_C	10	63724773	A	C	SNV	INTRONIC	2	intron			ENSG00000150347	ENST00000279873	ARID5B		18.18	k175.1	rs10821938
10:63837006:A_G	10	63837006	G	A	SNV	INTRONIC	2	intron			ENSG00000150347	ENST00000279873	ARID5B		19.44	k175.1	rs2393730
10:63837016:C_T	10	63837016	C	T	SNV	INTRONIC	2	intron			ENSG00000150347	ENST00000279873	ARID5B		21.3	k175.1	rs2393729
10:63837255:A_G	10	63837255	G	A	SNV	INTRONIC	2	intron			ENSG00000150347	ENST00000279873	ARID5B		17.36	k175.1	rs2393728
11:57448932:C_G	11	57448932	C	G	SNV	INTRONIC	2	intron			ENSG00000156599	ENST00000287169	ZDHHC5		18.15	k176.1	rs1785498
11:57518392:C_T	11	57518392	T	C	SNV	INTRONIC	2	intron			ENSG00000233436	ENST00000422652	BTBD18		16.63	k176.1	rs56392705
11:57518392:C_T	11	57518392	T	C	SNV	INTRONIC	2	intron,NMD			ENSG00000254462	ENST00000528395	TMX2-CTNND1		16.63	k176.1	rs56392705
11:57529429:A_G	11	57529429	A	G	SNV	5PRIME_UTR	3	5_prime_UTR			ENSG00000198561	ENST00000399050	CTNND1		17.06	k176.1	rs11570176
11:57529429:A_G	11	57529429	A	G	SNV	INTRONIC	2	intron,NMD			ENSG00000254462	ENST00000528395	TMX2-CTNND1		17.06	k176.1	rs11570176
15:83481880:A_G	15	83481880	A	G	SNV	NON_SYNONYMOUS	7	missense	N	S	ENSG00000156232	ENST00000286760	WHAMM	212	16.96	k178.1	rs35270670
3:12229015:A_G	3	12229015	A	G	SNV	DOWNSTREAM	1	downstream			ENSG00000157152	ENST00000432424	SYN2		19.75	k182.1	rs794999
3:105431215:A_G	3	105431215	G	A	SNV	INTRONIC	2	intron			ENSG00000114423	ENST00000264122	CBLB		16.72	k183.1	rs7646159
10:97278922:A_G	10	97278922	G	A	SNV	INTRONIC	2	intron			ENSG00000095637	ENST00000371247	SORBS1		17.57	k184.1	rs4918943
6:24228685:G_T	6	24228685	T	G	SNV	INTRONIC	2	intron			ENSG00000146038	ENST00000378454	DCDC2		16.21	k185.1	rs793839
6:24232697:A_G	6	24232697	G	A	SNV	INTRONIC	2	intron			ENSG00000146038	ENST00000378454	DCDC2		18.64	k185.1	rs793836
4:3449652:A_G	4	3449652	G	A	SNV	NON_SYNONYMOUS	7	missense	R	H	ENSG00000109758	ENST00000382774	HGFAC	509	23.1	k188.1	rs16844401
10:35055464:C_T	10	35055464	C	T	SNV	INTRONIC	2	intron			ENSG00000148498	ENST00000374789	PARD3		15.84	k189.1	rs10764005
17:37417575:C_G	17	37417575	C	G	SNV	3PRIME_UTR	2	3_prime_UTR			ENSG00000108306	ENST00000264658	FBXL20		15.62	k19.1	rs3744348
17:37669704:A_G	17	37669704	A	G	SNV	INTRONIC	2	intron			ENSG00000167258	ENST00000447079	CDK12		16.37	k19.1	rs7503705
17:37669704:A_G	17	37669704	A	G	SNV	INTRONIC	2	intron			ENSG00000167258	ENST00000447079	CDK12		16.37	k19.5	rs7503705
17:37879588:A_G	17	37879588	A	G	SNV	NON_SYNONYMOUS	7	missense	I	V	ENSG00000141736	ENST00000269571	ERBB2	655	19.96	k19.5	rs1136201
17:37879588:A_G	17	37879588	A	G	SNV	NON_SYNONYMOUS	7	missense	I	V	ENSG00000141736	ENST00000269571	ERBB2	655	19.96	k19.4	rs1136201
17:38280916:C_T	17	38280916	C	T	SNV	INTRONIC	2	intron			ENSG00000188895	ENST00000579565	MSL1		16.6	k19.5	rs117374443
17:38282670:A_G	17	38282670	A	G	SNV	INTRONIC	2	intron			ENSG00000188895	ENST00000579565	MSL1		16.65	k19.5	rs140328859
17:38291821:C_T	17	38291821	C	T	SNV	DOWNSTREAM	1	downstream			ENSG00000188895	ENST00000579565	MSL1		17.7	k19.5	rs16965660
17:38470768:A_C	17	38470768	A	C	SNV	INTRONIC	2	intron			ENSG00000131759	ENST00000254066	RARA		16.92	k19.5	rs137891066
17:38474528:C_T	17	38474528	C	T	SNV	INTRONIC	2	intron			ENSG00000131759	ENST00000254066	RARA		19.3	k19.5	rs143494424
17:38555557:C_T	17	38555557	T	C	SNV	INTRONIC	2	intron			ENSG00000131747	ENST00000423485	TOP2A		17.24	k19.5	rs16965748
17:38609002:A_G	17	38609002	A	G	SNV	INTRONIC	2	intron			ENSG00000141753	ENST00000269593	IGFBP4		19.47	k19.5	rs72819626
1:155175089:C_T	1	155175089	C	T	SNV	NON_SYNONYMOUS	7	missense	R	Q	ENSG00000169231	ENST00000368378	THBS3	102	26.6	k191.1	rs72704117
1:155175089:C_T	1	155175089	C	T	SNV	NON_SYNONYMOUS	7	missense	R	Q	ENSG00000169231	ENST00000368378	THBS3	102	26.6	k191.2	rs72704117
1:155033308:A_G	1	155033308	G	A	SNV	SPLICE_SITE	5	splice,synonymous	K	K	ENSG00000143537	ENST00000356955	ADAM15	759	20.3	k191.2	rs11589479
1:155058663:A_G	1	155058663	G	A	SNV	NON_SYNONYMOUS	7	missense	V	M	ENSG00000251246	ENST00000505139	EFNA3	185	26	k191.2	rs17723260
1:155058663:A_G	1	155058663	G	A	SNV	NON_SYNONYMOUS	7	missense	V	M	ENSG00000143590	ENST00000368408	EFNA3	190	26	k191.2	rs17723260
9:140130606:A_T	9	140130606	A	T	SNV	NON_SYNONYMOUS	7	missense	E	V	ENSG00000198569	ENST00000538474	SLC34A3	513	16.47	k194.1	9:140130606_A_T
15:67454378:G_T	15	67454378	T	G	SNV	INTRONIC	2	intron			ENSG00000166949	ENST00000327367	SMAD3		15.48	k195.1	rs79483120
15:67535440:C_T	15	67535440	T	C	SNV	INTRONIC	2	intron			ENSG00000103591	ENST00000261880	AAGAB		19.82	k195.1	rs12900708
15:67599975:C_T	15	67599975	C	T	SNV	INTRONIC	2	intron			ENSG00000103599	ENST00000335894	IQCH		21.5	k195.1	rs34310656
15:76220673:A_G	15	76220673	A	G	SNV	INTRONIC	2	intron			ENSG00000167196	ENST00000308275	FBXO22		16.74	k20.1	rs11072563
15:76220673:A_G	15	76220673	A	G	SNV	INTRONIC	2	intron			ENSG00000167196	ENST00000308275	FBXO22		16.74	k20.4	rs11072563
15:76193199:C_T	15	76193199	T	C	SNV	3PRIME_UTR	2	3_prime_UTR			ENSG00000140367	ENST00000267938	UBE2Q2		16.63	k20.4	rs74024017
6:100964147:C_G	6	100964147	G	C	SNV	NON_SYNONYMOUS	7	missense	S	C	ENSG00000112249	ENST00000369162	ASCC3	1995	18.75	k200.1	rs240780
6:100978351:C_T	6	100978351	C	T	SNV	INTRONIC	2	intron			ENSG00000112249	ENST00000369162	ASCC3		15.83	k200.1	rs2001102
6:100978570:C_T	6	100978570	C	T	SNV	INTRONIC	2	intron			ENSG00000112249	ENST00000369162	ASCC3		16.43	k200.1	rs12660725
1:228402121:A_G	1	228402121	A	G	SNV	NON_SYNONYMOUS	7	missense	Q	R	ENSG00000154358	ENST00000570156	OBSCN	502	23.6	k204.1	rs1771487
1:228520973:C_G	1	228520973	C	G	SNV	NON_SYNONYMOUS	7	missense	L	V	ENSG00000154358	ENST00000570156	OBSCN	6226	18.89	k204.1	rs369909
10:76041892:G_T	10	76041892	T	G	SNV	INTRONIC	2	intron			ENSG00000156110	ENST00000286621	ADK		16.68	k205.1	rs10824138
10:76140728:A_G	10	76140728	G	A	SNV	INTRONIC	2	intron			ENSG00000156110	ENST00000286621	ADK		20.2	k205.1	rs10824165
10:76198822:A_G	10	76198822	A	G	SNV	INTRONIC	2	intron			ENSG00000156110	ENST00000286621	ADK		16.75	k205.1	rs7083427
10:76198975:C_G	10	76198975	G	C	SNV	INTRONIC	2	intron			ENSG00000156110	ENST00000286621	ADK		16.7	k205.1	rs7095850
10:74894375:C_T	10	74894375	T	C	SNV	NON_SYNONYMOUS	7	missense	D	G	ENSG00000122882	ENST00000430082	ECD	667	26.6	k205.2	rs2271904
10:74968564:A_C	10	74968564	A	C	SNV	INTRONIC	2	intron			ENSG00000138286	ENST00000242505	FAM149B1		15.38	k205.2	rs3736519
10:75035257:C_T	10	75035257	T	C	SNV	NON_SYNONYMOUS	7	missense	N	D	ENSG00000156042	ENST00000310715	CFAP70	944	20.2	k205.2	rs4294502
10:75035257:C_T	10	75035257	T	C	SNV	NONCODING_CHANGE	5	non_coding_exon			ENSG00000236756	ENST00000440197	DNAJC9-AS1		20.2	k205.2	rs4294502
10:75079280:A_C	10	75079280	C	A	SNV	INTRONIC	2	intron			ENSG00000156042	ENST00000310715	CFAP70		15.24	k205.2	rs2183902
10:75150184:A_G	10	75150184	G	A	SNV	INTRONIC	2	intron			ENSG00000138279	ENST00000372919	ANXA7		16.23	k205.2	rs7072404
10:75203308:C_G	10	75203308	G	C	SNV	INTRONIC	2	intron			ENSG00000107758	ENST00000394829	PPP3CB		18.31	k205.2	rs77267541
10:75313232:A_G	10	75313232	G	A	SNV	INTRONIC	2	intron			ENSG00000166348	ENST00000339859	USP54		21.7	k205.2	rs1880701
4:52710913:A_G	4	52710913	A	G	SNV	INTRONIC	2	intron			ENSG00000109184	ENST00000334635	DCUN1D4		18.3	k206.1	rs10009426
4:52780048:C_G	4	52780048	G	C	SNV	3PRIME_UTR	2	3_prime_UTR			ENSG00000109184	ENST00000334635	DCUN1D4		15.65	k206.1	rs13531
3:141825598:C_T	3	141825598	C	T	SNV	INTRONIC	2	intron			ENSG00000114126	ENST00000489671	TFDP2		18.07	k21.1	rs6773343
3:141825598:C_T	3	141825598	C	T	SNV	INTRONIC	2	intron			ENSG00000114126	ENST00000489671	TFDP2		18.07	k21.2	rs6773343
3:141087623:C_T	3	141087623	T	C	SNV	5PRIME_UTR	3	5_prime_UTR			ENSG00000177311	ENST00000509842	ZBTB38		15.62	k21.3	rs1863868
3:141106063:C_T	3	141106063	T	C	SNV	UPSTREAM	1	upstream			ENSG00000177311	ENST00000514251	ZBTB38		17.42	k21.3	rs7632381
3:141108338:C_T	3	141108338	C	T	SNV	INTRONIC	2	intron			ENSG00000177311	ENST00000514251	ZBTB38		15.52	k21.3	rs55715288
11:118967291:A_G	11	118967291	A	G	SNV	3PRIME_UTR	2	3_prime_UTR			ENSG00000172269	ENST00000409993	DPAGT1		15.86	k210.1	rs7759
11:118967291:A_G	11	118967291	A	G	SNV	3PRIME_UTR	2	3_prime_UTR			ENSG00000172269	ENST00000409993	DPAGT1		15.86	k210.2	rs7759
11:118982671:A_G	11	118982671	G	A	SNV	INTRONIC	2	intron			ENSG00000172375	ENST00000336702	C2CD2L		15.43	k210.1	rs588539
11:118982671:A_G	11	118982671	G	A	SNV	INTRONIC	2	intron			ENSG00000172375	ENST00000336702	C2CD2L		15.43	k210.2	rs588539
11:119299592:A_G	11	119299592	A	G	SNV	INTRONIC	2	intron,non_coding			ENSG00000245248	ENST00000498979	USP2-AS1		15.54	k210.1	rs12420302
11:119299592:A_G	11	119299592	A	G	SNV	INTRONIC	2	intron,non_coding			ENSG00000245248	ENST00000498979	USP2-AS1		15.54	k210.2	rs12420302
12:4607342:A_T	12	4607342	A	T	SNV	INTRONIC	2	intron			ENSG00000047621	ENST00000261250	C12orf4		18.88	k211.1	rs2909380
6:55638712:A_G	6	55638712	G	A	SNV	INTRONIC	2	intron			ENSG00000112175	ENST00000370830	BMP5		18.56	k215.1	rs1348892
6:55644002:A_T	6	55644002	T	A	SNV	INTRONIC	2	intron			ENSG00000112175	ENST00000370830	BMP5		18.35	k215.1	rs72868879
1:10724236:A_G	1	10724236	G	A	SNV	INTRONIC	2	intron			ENSG00000130940	ENST00000377022	CASZ1		18.16	k216.1	rs284324
1:10725193:A_G	1	10725193	G	A	SNV	NON_SYNONYMOUS	7	missense	S	L	ENSG00000130940	ENST00000377022	CASZ1	151	17.46	k216.1	rs116460699
1:10732378:C_T	1	10732378	C	T	SNV	INTRONIC	2	intron			ENSG00000130940	ENST00000377022	CASZ1		19.76	k216.1	rs4845840
1:10732378:C_T	1	10732378	C	T	SNV	INTRONIC	2	intron			ENSG00000130940	ENST00000377022	CASZ1		19.76	k216.2	rs4845840
1:10833232:C_G	1	10833232	C	G	SNV	INTRONIC	2	intron			ENSG00000130940	ENST00000377022	CASZ1		16.15	k216.2	rs58064215
1:10856692:C_T	1	10856692	C	T	SNV	5PRIME_UTR	3	5_prime_UTR			ENSG00000130940	ENST00000377022	CASZ1		19.94	k216.2	rs11121627
16:1997004:C_T	16	1997004	C	T	SNV	NON_SYNONYMOUS	7	missense	V	M	ENSG00000140986	ENST00000268661	RPL3L	262	24.6	k218.1	rs113956264
16:2025604:C_G	16	2025604	G	C	SNV	NON_SYNONYMOUS	7	missense	E	Q	ENSG00000183751	ENST00000568546	TBL3	294	18.29	k218.2	rs8052713
3:14187449:G_T	3	14187449	G	T	SNV	NON_SYNONYMOUS	7	missense	Q	K	ENSG00000154767	ENST00000285021	XPC	939	17.09	k219.1	rs2228001
17:56540267:C_T	17	56540267	C	T	SNV	NON_SYNONYMOUS	7	missense	S	N	ENSG00000176160	ENST00000323777	HSF5	473	18.73	k220.1	rs3803752
17:56568680:C_T	17	56568680	C	T	SNV	3PRIME_UTR	2	3_prime_UTR			ENSG00000108389	ENST00000323456	MTMR4		15.65	k220.1	rs3087762
17:56802059:A_G	17	56802059	G	A	SNV	INTRONIC	2	intron			ENSG00000108384	ENST00000337432	RAD51C		20.8	k220.1	rs304269
17:56964386:C_T	17	56964386	T	C	SNV	INTRONIC	2	intron			ENSG00000175175	ENST00000308249	PPM1E		15.15	k220.1	rs62083410
20:14546035:C_T	20	14546035	C	T	SNV	INTRONIC	2	intron			ENSG00000172264	ENST00000217246	MACROD2		15.01	k222.1	rs11700265
20:14546035:C_T	20	14546035	C	T	SNV	INTRONIC	2	intron,non_coding			ENSG00000227927	ENST00000448536	MACROD2-IT1		15.01	k222.1	rs11700265
20:14671075:A_C	20	14671075	A	C	SNV	INTRONIC	2	intron			ENSG00000172264	ENST00000217246	MACROD2		19.13	k222.1	rs6105308
20:14673838:G_T	20	14673838	G	T	SNV	INTRONIC	2	intron			ENSG00000172264	ENST00000217246	MACROD2		18.81	k222.1	rs1932953
1:220190845:A_C	1	220190845	C	A	SNV	INTRONIC	2	intron			ENSG00000136628	ENST00000366923	EPRS1		18.98	k223.1	rs2577156
1:220190967:A_G	1	220190967	A	G	SNV	INTRONIC	2	intron			ENSG00000136628	ENST00000366923	EPRS1		19.12	k223.1	rs2789813
1:220331205:C_G	1	220331205	C	G	SNV	NON_SYNONYMOUS	7	missense	S	T	ENSG00000118873	ENST00000358951	RAB3GAP2	1092	27.3	k223.1	rs2289189
1:220427144:A_C	1	220427144	A	C	SNV	INTRONIC	2	intron			ENSG00000118873	ENST00000358951	RAB3GAP2		15.45	k223.1	rs147558065
17:19474875:C_T	17	19474875	C	T	SNV	NON_SYNONYMOUS	7	missense	A	V	ENSG00000142494	ENST00000270570	SLC47A1	465	22.5	k23.1	rs111653425
1:150940625:G_T	1	150940625	T	G	SNV	NON_SYNONYMOUS	7	missense	E	A	ENSG00000143418	ENST00000271688	CERS2	115	26.8	k24.1	rs267738
15:53951435:A_C	15	53951435	A	C	SNV	INTRONIC	2	intron			ENSG00000166415	ENST00000396328	WDR72		16.7	k25.2	rs1031755
15:53951435:A_C	15	53951435	A	C	SNV	INTRONIC	2	intron			ENSG00000166415	ENST00000396328	WDR72		16.7	k25.1	rs1031755
15:53951548:C_G	15	53951548	G	C	SNV	INTRONIC	2	intron			ENSG00000166415	ENST00000396328	WDR72		15.03	k25.2	rs1031756
15:53951548:C_G	15	53951548	G	C	SNV	INTRONIC	2	intron			ENSG00000166415	ENST00000396328	WDR72		15.03	k25.1	rs1031756
15:54003091:A_G	15	54003091	G	A	SNV	NON_SYNONYMOUS	7	missense	P	L	ENSG00000166415	ENST00000396328	WDR72	306	26.7	k25.1	rs551225
15:54009231:C_T	15	54009231	T	C	SNV	INTRONIC	2	intron			ENSG00000166415	ENST00000396328	WDR72		15.69	k25.1	rs475377
15:53855925:C_T	15	53855925	T	C	SNV	INTRONIC	2	intron			ENSG00000166415	ENST00000396328	WDR72		17.9	k25.2	rs4774667
15:53859486:A_G	15	53859486	A	G	SNV	INTRONIC	2	intron			ENSG00000166415	ENST00000396328	WDR72		16.29	k25.2	rs9920245
15:53907948:A_G	15	53907948	G	A	SNV	NON_SYNONYMOUS	7	missense	L	F	ENSG00000166415	ENST00000396328	WDR72	819	25.3	k25.2	rs17730281
7:77515422:A_T	7	77515422	A	T	SNV	INTRONIC	2	intron			ENSG00000006576	ENST00000416283	PHTF2		15.08	k26.1	rs62462688
20:33449691:C_T	20	33449691	C	T	SNV	INTRONIC	2	intron			ENSG00000131067	ENST00000336431	GGT7		16.03	k30.1	rs11698977
1:113255456:A_C	1	113255456	C	A	SNV	NON_SYNONYMOUS	7	missense	L	F	ENSG00000155367	ENST00000309276	PPM1J	213	15.79	k32.1	rs34611728
1:113255456:A_C	1	113255456	C	A	SNV	NON_SYNONYMOUS	7	missense	L	F	ENSG00000155367	ENST00000309276	PPM1J	213	15.79	k32.2	rs34611728
1:113256368:C_G	1	113256368	G	C	SNV	INTRONIC	2	intron			ENSG00000155367	ENST00000309276	PPM1J		20.5	k32.1	rs12724682
1:113256368:C_G	1	113256368	G	C	SNV	INTRONIC	2	intron			ENSG00000155367	ENST00000309276	PPM1J		20.5	k32.2	rs12724682
1:113254648:A_G	1	113254648	A	G	SNV	NON_SYNONYMOUS	7	missense	I	T	ENSG00000155367	ENST00000309276	PPM1J	291	25.9	k32.2	rs78366259
22:40881402:C_T	22	40881402	T	C	SNV	INTRONIC	2	intron			ENSG00000196588	ENST00000355630	MRTFA		17.93	k33.1	rs3827381
22:40881403:A_G	22	40881403	G	A	SNV	INTRONIC	2	intron			ENSG00000196588	ENST00000355630	MRTFA		20.2	k33.1	rs3827382
22:40888363:A_G	22	40888363	G	A	SNV	INTRONIC	2	intron			ENSG00000196588	ENST00000355630	MRTFA		22	k33.1	rs73167090
22:40417820:A_G	22	40417820	A	G	SNV	NON_SYNONYMOUS	7	missense	R	G	ENSG00000133477	ENST00000333407	FAM83F	436	17.98	k33.3	rs5995794
5:68616331:C_T	5	68616331	C	T	SNV	NON_SYNONYMOUS	7	missense	V	M	ENSG00000183323	ENST00000396496	CCDC125	13	18.99	k35.3	rs10471774
5:68725130:C_T	5	68725130	T	C	SNV	INTRONIC	2	intron			ENSG00000152939	ENST00000325631	MARVELD2		16.85	k35.3	rs2561159
2:176974104:G_T	2	176974104	G	T	SNV	3PRIME_UTR	2	3_prime_UTR			ENSG00000128713	ENST00000249504	HOXD11		18.42	k37.3	rs863678
2:176974104:G_T	2	176974104	G	T	SNV	3PRIME_UTR	2	3_prime_UTR			ENSG00000128713	ENST00000249504	HOXD11		18.42	k37.6	rs863678
2:176974104:G_T	2	176974104	G	T	SNV	3PRIME_UTR	2	3_prime_UTR			ENSG00000128713	ENST00000249504	HOXD11		18.42	k37.5	rs863678
2:177043205:C_T	2	177043205	T	C	SNV	UPSTREAM	1	upstream			ENSG00000224189	ENST00000416928	HAGLR		19.16	k37.4	rs6755766
2:177043205:C_T	2	177043205	T	C	SNV	UPSTREAM	1	upstream			ENSG00000224189	ENST00000416928	HAGLR		19.16	k37.6	rs6755766
2:177043205:C_T	2	177043205	T	C	SNV	UPSTREAM	1	upstream			ENSG00000224189	ENST00000416928	HAGLR		19.16	k37.5	rs6755766
11:65143892:A_G	11	65143892	G	A	SNV	NON_SYNONYMOUS	7	missense	R	C	ENSG00000162241	ENST00000398802	SLC25A45	285	22.9	k38.2	rs34400381
10:52645424:C_T	10	52645424	C	T	SNV	5PRIME_UTR	3	5_prime_UTR			ENSG00000148584	ENST00000373995	A1CF		20.4	k40.1	rs10994860
1:201016296:A_G	1	201016296	G	A	SNV	NON_SYNONYMOUS	7	missense	R	C	ENSG00000081248	ENST00000362061	CACNA1S	1539	25.9	k48.1	rs3850625
10:69933969:A_G	10	69933969	G	A	SNV	NON_SYNONYMOUS	7	missense	S	N	ENSG00000138347	ENST00000358913	MYPN	707	19.53	k49.1	rs7916821
10:69933969:A_G	10	69933969	G	A	SNV	NON_SYNONYMOUS	7	missense	S	N	ENSG00000138347	ENST00000358913	MYPN	707	19.53	k49.2	rs7916821
10:69959242:A_C	10	69959242	C	A	SNV	NON_SYNONYMOUS	7	missense	P	T	ENSG00000138347	ENST00000358913	MYPN	1135	26.8	k49.1	rs7079481
10:69959242:A_C	10	69959242	C	A	SNV	NON_SYNONYMOUS	7	missense	P	T	ENSG00000138347	ENST00000358913	MYPN	1135	26.8	k49.2	rs7079481
10:70332672:A_T	10	70332672	T	A	SNV	NON_SYNONYMOUS	7	missense	S	T	ENSG00000138336	ENST00000373644	TET1	193	15.29	k49.2	rs12773594
11:2943671:C_G	11	2943671	G	C	SNV	NON_SYNONYMOUS	7	missense	W	C	ENSG00000110628	ENST00000380574	SLC22A18	324	22.4	k50.2	rs1129782
11:2943671:C_G	11	2943671	G	C	SNV	NON_SYNONYMOUS	7	missense	W	C	ENSG00000110628	ENST00000380574	SLC22A18	324	22.4	k50.3	rs1129782
2:220354108:A_G	2	220354108	A	G	SNV	NON_SYNONYMOUS	7	missense	R	G	ENSG00000072195	ENST00000312358	SPEG	2790	22.3	k52.1	rs55760516
1:15876578:A_G	1	15876578	A	G	SNV	INTRONIC	2	intron			ENSG00000116138	ENST00000375847	DNAJC16		15.65	k55.1	rs10803391
1:16576836:A_G	1	16576836	A	G	SNV	3PRIME_UTR	2	3_prime_UTR			ENSG00000037637	ENST00000375592	FBXO42		15.57	k55.2	rs7536390
1:184672098:A_G	1	184672098	G	A	SNV	NON_SYNONYMOUS	7	missense	P	S	ENSG00000116406	ENST00000318130	EDEM3	746	25.2	k57.1	rs78444298
10:93743172:C_G	10	93743172	G	C	SNV	INTRONIC	2	intron			ENSG00000095564	ENST00000265990	BTAF1		16.84	k58.2	rs1474051
10:93789267:C_T	10	93789267	T	C	SNV	3PRIME_UTR	2	3_prime_UTR			ENSG00000095564	ENST00000265990	BTAF1		16.09	k58.2	rs1914345
4:103925671:A_G	4	103925671	G	A	SNV	INTRONIC	2	intron			ENSG00000164037	ENST00000296422	SLC9B1		15.06	k59.1	rs4699046
2:211540507:A_C	2	211540507	C	A	SNV	NON_SYNONYMOUS	7	missense	T	N	ENSG00000021826	ENST00000430249	CPS1	1412	19.99	k6.1	rs1047891
2:210733835:A_G	2	210733835	G	A	SNV	INTRONIC	2	intron			ENSG00000144406	ENST00000439458	UNC80		16.48	k6.2	rs7593426
2:210856601:G_T	2	210856601	T	G	SNV	INTRONIC	2	intron			ENSG00000144406	ENST00000439458	UNC80		16.19	k6.2	rs13017752
2:211060050:G_T	2	211060050	T	G	SNV	NON_SYNONYMOUS	7	missense	K	Q	ENSG00000115361	ENST00000233710	ACADL	333	27.1	k6.2	rs2286963
2:211321200:A_G	2	211321200	G	A	SNV	INTRONIC	2	intron			ENSG00000115365	ENST00000443314	LANCL1		15.17	k6.2	rs3845633
2:211321473:A_G	2	211321473	G	A	SNV	INTRONIC	2	intron			ENSG00000115365	ENST00000443314	LANCL1		17.45	k6.2	rs3856339
2:211409732:C_T	2	211409732	C	T	SNV	INTRONIC	2	intron			ENSG00000021826	ENST00000430249	CPS1		15.61	k6.2	rs11904031
2:211409800:G_T	2	211409800	G	T	SNV	INTRONIC	2	intron			ENSG00000021826	ENST00000430249	CPS1		17.56	k6.2	rs10932342
2:148657117:A_G	2	148657117	G	A	SNV	SYNONYMOUS	5	synonymous	P	P	ENSG00000121989	ENST00000241416	ACVR2A	118	15.52	k60.1	rs1128919
2:148716428:C_T	2	148716428	T	C	SNV	NON_SYNONYMOUS	7	missense	N	S	ENSG00000115947	ENST00000392857	ORC4	78	19.05	k60.1	rs2307394
2:148723126:A_C	2	148723126	A	C	SNV	INTRONIC	2	intron			ENSG00000115947	ENST00000392857	ORC4		15.03	k60.1	rs6729465
3:186435370:A_G	3	186435370	G	A	SNV	SYNONYMOUS	5	synonymous	L	L	ENSG00000113889	ENST00000265023	KNG1	13	20.3	k61.1	rs1050274
3:121635230:A_G	3	121635230	G	A	SNV	INTRONIC	2	intron			ENSG00000163406	ENST00000489711	SLC15A2		17.66	k64.1	rs2700420
3:121647286:C_T	3	121647286	C	T	SNV	NON_SYNONYMOUS	7	missense	P	S	ENSG00000163406	ENST00000489711	SLC15A2	409	16.78	k64.1	rs1143671
2:120848049:C_T	2	120848049	C	T	SNV	NON_SYNONYMOUS	7	missense	H	Y	ENSG00000115109	ENST00000263713	EPB41L5	334	23.4	k66.2	rs28930677
2:170010985:C_T	2	170010985	T	C	SNV	NON_SYNONYMOUS	7	missense	K	E	ENSG00000081479	ENST00000263816	LRP2	4094	21.3	k67.1	rs2075252
2:170010985:C_T	2	170010985	T	C	SNV	NON_SYNONYMOUS	7	missense	K	E	ENSG00000081479	ENST00000263816	LRP2	4094	21.3	k67.3	rs2075252
2:170202833:G_T	2	170202833	T	G	SNV	INTRONIC	2	intron			ENSG00000081479	ENST00000263816	LRP2		19.15	k67.2	rs3770636
2:170202833:G_T	2	170202833	T	G	SNV	INTRONIC	2	intron			ENSG00000081479	ENST00000263816	LRP2		19.15	k67.4	rs3770636
13:72345089:C_T	13	72345089	C	T	SNV	INTRONIC	2	intron			ENSG00000165659	ENST00000305425	DACH1		19.92	k68.1	rs9529913
13:72364384:C_T	13	72364384	T	C	SNV	INTRONIC	2	intron			ENSG00000165659	ENST00000305425	DACH1		17.02	k68.1	rs303952
13:72371757:G_T	13	72371757	T	G	SNV	INTRONIC	2	intron			ENSG00000165659	ENST00000305425	DACH1		22.4	k68.1	rs303938
17:59456589:C_T	17	59456589	C	T	SNV	INTRONIC	2	intron			ENSG00000141376	ENST00000390652	BCAS3		15.99	k7.1	rs9895661
17:59239149:A_T	17	59239149	T	A	SNV	INTRONIC	2	intron			ENSG00000141376	ENST00000390652	BCAS3		18.64	k7.2	rs2378816
17:59239149:A_T	17	59239149	T	A	SNV	INTRONIC	2	intron			ENSG00000141376	ENST00000390652	BCAS3		18.64	k7.4	rs2378816
17:59239259:C_T	17	59239259	T	C	SNV	INTRONIC	2	intron			ENSG00000141376	ENST00000390652	BCAS3		15.19	k7.2	rs9905761
17:59239259:C_T	17	59239259	T	C	SNV	INTRONIC	2	intron			ENSG00000141376	ENST00000390652	BCAS3		15.19	k7.4	rs9905761
17:59478776:C_G	17	59478776	G	C	SNV	INTRONIC	2	intron			ENSG00000121068	ENST00000240328	TBX2		15.75	k7.3	rs2270114
17:59484833:C_T	17	59484833	C	T	SNV	INTRONIC	2	intron			ENSG00000121068	ENST00000240328	TBX2		16.9	k7.3	rs8073698
17:59486732:C_T	17	59486732	C	T	SNV	3PRIME_UTR	2	3_prime_UTR			ENSG00000121068	ENST00000240328	TBX2		15.92	k7.3	rs1058004
17:59486799:A_G	17	59486799	A	G	SNV	DOWNSTREAM	1	downstream			ENSG00000121068	ENST00000240328	TBX2		17.91	k7.3	rs729781
2:121985759:C_T	2	121985759	C	T	SNV	INTRONIC	2	intron			ENSG00000115112	ENST00000263707	TFCP2L1		16.16	k70.1	rs34773350
8:8560602:C_T	8	8560602	C	T	SNV	NON_SYNONYMOUS	7	missense	P	S	ENSG00000253958	ENST00000519106	CLDN23	232	15.93	k71.2	rs2280560
6:30711357:A_G	6	30711357	G	A	SNV	3PRIME_UTR	2	3_prime_UTR			ENSG00000137331	ENST00000259874	IER3		15.35	k73.7	rs8512
6:30711357:A_G	6	30711357	G	A	SNV	3PRIME_UTR	2	3_prime_UTR			ENSG00000137331	ENST00000259874	IER3		15.35	k73.8	rs8512
6:30711357:A_G	6	30711357	G	A	SNV	3PRIME_UTR	2	3_prime_UTR			ENSG00000137331	ENST00000259874	IER3		15.35	k73.9	rs8512
6:30711357:A_G	6	30711357	G	A	SNV	3PRIME_UTR	2	3_prime_UTR			ENSG00000137331	ENST00000259874	IER3		15.35	k73.6	rs8512
6:30711357:A_G	6	30711357	G	A	SNV	3PRIME_UTR	2	3_prime_UTR			ENSG00000137331	ENST00000259874	IER3		15.35	k73.1	rs8512
6:31083945:C_T	6	31083945	C	T	SNV	NON_SYNONYMOUS	7	missense	A	T	ENSG00000204539	ENST00000376288	CDSN	483	25.3	k73.8	rs145583110
6:31083945:C_T	6	31083945	C	T	SNV	INTRONIC	2	intron			ENSG00000204540	ENST00000259881	PSORS1C1		25.3	k73.9	rs145583110
6:31083945:C_T	6	31083945	C	T	SNV	INTRONIC	2	intron			ENSG00000204540	ENST00000259881	PSORS1C1		25.3	k73.6	rs145583110
6:31083945:C_T	6	31083945	C	T	SNV	INTRONIC	2	intron			ENSG00000204540	ENST00000259881	PSORS1C1		25.3	k73.7	rs145583110
6:31083945:C_T	6	31083945	C	T	SNV	NON_SYNONYMOUS	7	missense	A	T	ENSG00000204539	ENST00000376288	CDSN	483	25.3	k73.9	rs145583110
6:31083945:C_T	6	31083945	C	T	SNV	INTRONIC	2	intron			ENSG00000204540	ENST00000259881	PSORS1C1		25.3	k73.1	rs145583110
6:31083945:C_T	6	31083945	C	T	SNV	INTRONIC	2	intron			ENSG00000204540	ENST00000259881	PSORS1C1		25.3	k73.8	rs145583110
6:31083945:C_T	6	31083945	C	T	SNV	NON_SYNONYMOUS	7	missense	A	T	ENSG00000204539	ENST00000376288	CDSN	483	25.3	k73.7	rs145583110
6:31083945:C_T	6	31083945	C	T	SNV	NON_SYNONYMOUS	7	missense	A	T	ENSG00000204539	ENST00000376288	CDSN	483	25.3	k73.6	rs145583110
6:31083945:C_T	6	31083945	C	T	SNV	NON_SYNONYMOUS	7	missense	A	T	ENSG00000204539	ENST00000376288	CDSN	483	25.3	k73.1	rs145583110
6:31096073:G_T	6	31096073	T	G	SNV	INTRONIC	2	intron			ENSG00000204540	ENST00000259881	PSORS1C1		15.91	k73.9	rs186072506
6:31096073:G_T	6	31096073	T	G	SNV	INTRONIC	2	intron			ENSG00000204540	ENST00000259881	PSORS1C1		15.91	k73.6	rs186072506
6:31096073:G_T	6	31096073	T	G	SNV	INTRONIC	2	intron			ENSG00000204540	ENST00000259881	PSORS1C1		15.91	k73.8	rs186072506
6:31096073:G_T	6	31096073	T	G	SNV	INTRONIC	2	intron			ENSG00000204540	ENST00000259881	PSORS1C1		15.91	k73.7	rs186072506
6:31096073:G_T	6	31096073	T	G	SNV	INTRONIC	2	intron			ENSG00000204540	ENST00000259881	PSORS1C1		15.91	k73.1	rs186072506
6:31122502:C_T	6	31122502	C	T	SNV	NON_SYNONYMOUS	7	missense	R	Q	ENSG00000204536	ENST00000396268	CCHCR1	191	23.1	k73.9	rs130075
6:31122502:C_T	6	31122502	C	T	SNV	NON_SYNONYMOUS	7	missense	R	Q	ENSG00000204536	ENST00000396268	CCHCR1	191	23.1	k73.8	rs130075
6:31122502:C_T	6	31122502	C	T	SNV	NON_SYNONYMOUS	7	missense	R	Q	ENSG00000204536	ENST00000396268	CCHCR1	191	23.1	k73.7	rs130075
6:31122502:C_T	6	31122502	C	T	SNV	NON_SYNONYMOUS	7	missense	R	Q	ENSG00000204536	ENST00000396268	CCHCR1	191	23.1	k73.1	rs130075
6:31122502:C_T	6	31122502	C	T	SNV	NON_SYNONYMOUS	7	missense	R	Q	ENSG00000204536	ENST00000396268	CCHCR1	191	23.1	k73.6	rs130075
6:31603189:A_G	6	31603189	G	A	SNV	NON_SYNONYMOUS	7	missense	V	M	ENSG00000204469	ENST00000376033	PRRC2A	1774	21.5	k73.9	rs11538264
6:31603189:A_G	6	31603189	G	A	SNV	NON_SYNONYMOUS	7	missense	V	M	ENSG00000204469	ENST00000376033	PRRC2A	1774	21.5	k73.7	rs11538264
6:31603189:A_G	6	31603189	G	A	SNV	NON_SYNONYMOUS	7	missense	V	M	ENSG00000204469	ENST00000376033	PRRC2A	1774	21.5	k73.8	rs11538264
6:31603189:A_G	6	31603189	G	A	SNV	NON_SYNONYMOUS	7	missense	V	M	ENSG00000204469	ENST00000376033	PRRC2A	1774	21.5	k73.1	rs11538264
6:31603189:A_G	6	31603189	G	A	SNV	NON_SYNONYMOUS	7	missense	V	M	ENSG00000204469	ENST00000376033	PRRC2A	1774	21.5	k73.6	rs11538264
6:31604591:C_T	6	31604591	C	T	SNV	NON_SYNONYMOUS	7	missense	P	S	ENSG00000204469	ENST00000376033	PRRC2A	2006	26	k73.6	rs10885
6:31604591:C_T	6	31604591	C	T	SNV	NON_SYNONYMOUS	7	missense	P	S	ENSG00000204469	ENST00000376033	PRRC2A	2006	26	k73.7	rs10885
6:31604591:C_T	6	31604591	C	T	SNV	NON_SYNONYMOUS	7	missense	P	S	ENSG00000204469	ENST00000376033	PRRC2A	2006	26	k73.8	rs10885
6:31604591:C_T	6	31604591	C	T	SNV	NON_SYNONYMOUS	7	missense	P	S	ENSG00000204469	ENST00000376033	PRRC2A	2006	26	k73.9	rs10885
6:31604591:C_T	6	31604591	C	T	SNV	NON_SYNONYMOUS	7	missense	P	S	ENSG00000204469	ENST00000376033	PRRC2A	2006	26	k73.1	rs10885
6:31632134:A_C	6	31632134	C	A	SNV	NON_SYNONYMOUS	7	missense	R	L	ENSG00000204438	ENST00000375906	GPANK1	41	31	k73.8	rs3130618
6:31632134:A_C	6	31632134	C	A	SNV	NON_SYNONYMOUS	7	missense	R	L	ENSG00000204438	ENST00000375906	GPANK1	41	31	k73.6	rs3130618
6:31632134:A_C	6	31632134	C	A	SNV	NON_SYNONYMOUS	7	missense	R	L	ENSG00000204438	ENST00000375906	GPANK1	41	31	k73.9	rs3130618
6:31632134:A_C	6	31632134	C	A	SNV	NON_SYNONYMOUS	7	missense	R	L	ENSG00000204438	ENST00000375906	GPANK1	41	31	k73.1	rs3130618
6:31632134:A_C	6	31632134	C	A	SNV	NON_SYNONYMOUS	7	missense	R	L	ENSG00000204438	ENST00000375906	GPANK1	41	31	k73.7	rs3130618
6:31683157:G_T	6	31683157	T	G	SNV	NON_SYNONYMOUS	7	missense	L	V	ENSG00000244355	ENST00000375825	LY6G6D	9	17.54	k73.8	rs3749952
6:31683157:G_T	6	31683157	T	G	SNV	NON_SYNONYMOUS	7	missense	L	V	ENSG00000244355	ENST00000375825	LY6G6D	9	17.54	k73.9	rs3749952
6:31683157:G_T	6	31683157	T	G	SNV	NON_SYNONYMOUS	7	missense	L	V	ENSG00000244355	ENST00000375825	LY6G6D	9	17.54	k73.1	rs3749952
6:31683157:G_T	6	31683157	T	G	SNV	NON_SYNONYMOUS	7	missense	L	V	ENSG00000244355	ENST00000375825	LY6G6D	9	17.54	k73.6	rs3749952
6:31683157:G_T	6	31683157	T	G	SNV	NON_SYNONYMOUS	7	missense	L	V	ENSG00000244355	ENST00000375825	LY6G6D	9	17.54	k73.7	rs3749952
6:31750509:A_G	6	31750509	G	A	SNV	NON_SYNONYMOUS	7	missense	P	S	ENSG00000204394	ENST00000375663	VARS1	626	19.44	k73.7	rs11531
6:31750509:A_G	6	31750509	G	A	SNV	NON_SYNONYMOUS	7	missense	P	S	ENSG00000204394	ENST00000375663	VARS1	626	19.44	k73.8	rs11531
6:31750509:A_G	6	31750509	G	A	SNV	NON_SYNONYMOUS	7	missense	P	S	ENSG00000204394	ENST00000375663	VARS1	626	19.44	k73.6	rs11531
6:31750509:A_G	6	31750509	G	A	SNV	NON_SYNONYMOUS	7	missense	P	S	ENSG00000204394	ENST00000375663	VARS1	626	19.44	k73.9	rs11531
6:31750509:A_G	6	31750509	G	A	SNV	NON_SYNONYMOUS	7	missense	P	S	ENSG00000204394	ENST00000375663	VARS1	626	19.44	k73.1	rs11531
6:31783863:C_G	6	31783863	G	C	SNV	NON_SYNONYMOUS	7	missense	E	D	ENSG00000204389	ENST00000375651	HSPA1A	110	22.9	k73.6	rs562047
6:31783863:C_G	6	31783863	G	C	SNV	NON_SYNONYMOUS	7	missense	E	D	ENSG00000204389	ENST00000375651	HSPA1A	110	22.9	k73.9	rs562047
6:31783863:C_G	6	31783863	G	C	SNV	NON_SYNONYMOUS	7	missense	E	D	ENSG00000204389	ENST00000375651	HSPA1A	110	22.9	k73.1	rs562047
6:31783863:C_G	6	31783863	G	C	SNV	NON_SYNONYMOUS	7	missense	E	D	ENSG00000204389	ENST00000375651	HSPA1A	110	22.9	k73.8	rs562047
6:31783863:C_G	6	31783863	G	C	SNV	NON_SYNONYMOUS	7	missense	E	D	ENSG00000204389	ENST00000375651	HSPA1A	110	22.9	k73.7	rs562047
6:31929737:C_T	6	31929737	C	T	SNV	NON_SYNONYMOUS	7	missense	R	W	ENSG00000204351	ENST00000375394	SKIC2	324	26.5	k73.7	rs36038685
6:31929737:C_T	6	31929737	C	T	SNV	NON_SYNONYMOUS	7	missense	R	W	ENSG00000204351	ENST00000375394	SKIC2	324	26.5	k73.6	rs36038685
6:31929737:C_T	6	31929737	C	T	SNV	NON_SYNONYMOUS	7	missense	R	W	ENSG00000204351	ENST00000375394	SKIC2	324	26.5	k73.9	rs36038685
6:31929737:C_T	6	31929737	C	T	SNV	NON_SYNONYMOUS	7	missense	R	W	ENSG00000204351	ENST00000375394	SKIC2	324	26.5	k73.1	rs36038685
6:31929737:C_T	6	31929737	C	T	SNV	NON_SYNONYMOUS	7	missense	R	W	ENSG00000204351	ENST00000375394	SKIC2	324	26.5	k73.4	rs36038685
6:31929737:C_T	6	31929737	C	T	SNV	NON_SYNONYMOUS	7	missense	R	W	ENSG00000204351	ENST00000375394	SKIC2	324	26.5	k73.8	rs36038685
6:31946792:A_G	6	31946792	G	A	SNV	SPLICE_SITE	5	splice,intron			ENSG00000204344	ENST00000375333	STK19		21.8	k73.9	rs2746394
6:31946792:A_G	6	31946792	G	A	SNV	SPLICE_SITE	5	splice,intron			ENSG00000204344	ENST00000375333	STK19		21.8	k73.4	rs2746394
6:31946792:A_G	6	31946792	G	A	SNV	SPLICE_SITE	5	splice,intron			ENSG00000204344	ENST00000375333	STK19		21.8	k73.7	rs2746394
6:31946792:A_G	6	31946792	G	A	SNV	SPLICE_SITE	5	splice,intron			ENSG00000204344	ENST00000375333	STK19		21.8	k73.1	rs2746394
6:31946792:A_G	6	31946792	G	A	SNV	SPLICE_SITE	5	splice,intron			ENSG00000204344	ENST00000375333	STK19		21.8	k73.6	rs2746394
6:31946792:A_G	6	31946792	G	A	SNV	SPLICE_SITE	5	splice,intron			ENSG00000204344	ENST00000375333	STK19		21.8	k73.8	rs2746394
6:32151443:C_T	6	32151443	C	T	SNV	NON_SYNONYMOUS	7	missense	G	S	ENSG00000204305	ENST00000375076	AGER	82	26.8	k73.8	rs2070600
6:32151443:C_T	6	32151443	C	T	SNV	NON_SYNONYMOUS	7	missense	G	S	ENSG00000204305	ENST00000375076	AGER	82	26.8	k73.7	rs2070600
6:32151443:C_T	6	32151443	C	T	SNV	NON_SYNONYMOUS	7	missense	G	S	ENSG00000204305	ENST00000375076	AGER	82	26.8	k73.6	rs2070600
6:32151443:C_T	6	32151443	C	T	SNV	NON_SYNONYMOUS	7	missense	G	S	ENSG00000204305	ENST00000375076	AGER	82	26.8	k73.4	rs2070600
6:32151443:C_T	6	32151443	C	T	SNV	NON_SYNONYMOUS	7	missense	G	S	ENSG00000204305	ENST00000375076	AGER	82	26.8	k73.1	rs2070600
6:32151443:C_T	6	32151443	C	T	SNV	NON_SYNONYMOUS	7	missense	G	S	ENSG00000204305	ENST00000375076	AGER	82	26.8	k73.9	rs2070600
6:32157364:A_G	6	32157364	G	A	SNV	INTRONIC	2	intron			ENSG00000204304	ENST00000375050	PBX2		15.88	k73.6	rs2856437
6:32157364:A_G	6	32157364	G	A	SNV	INTRONIC	2	intron			ENSG00000204304	ENST00000375050	PBX2		15.88	k73.7	rs2856437
6:32157364:A_G	6	32157364	G	A	SNV	INTRONIC	2	intron			ENSG00000204304	ENST00000375050	PBX2		15.88	k73.4	rs2856437
6:32157364:A_G	6	32157364	G	A	SNV	INTRONIC	2	intron			ENSG00000204304	ENST00000375050	PBX2		15.88	k73.9	rs2856437
6:32157364:A_G	6	32157364	G	A	SNV	INTRONIC	2	intron			ENSG00000204304	ENST00000375050	PBX2		15.88	k73.8	rs2856437
6:32157364:A_G	6	32157364	G	A	SNV	INTRONIC	2	intron			ENSG00000204304	ENST00000375050	PBX2		15.88	k73.1	rs2856437
6:32157398:A_G	6	32157398	G	A	SNV	INTRONIC	2	intron			ENSG00000204304	ENST00000375050	PBX2		15.27	k73.6	rs186524891
6:32157398:A_G	6	32157398	G	A	SNV	INTRONIC	2	intron			ENSG00000204304	ENST00000375050	PBX2		15.27	k73.1	rs186524891
6:32157398:A_G	6	32157398	G	A	SNV	INTRONIC	2	intron			ENSG00000204304	ENST00000375050	PBX2		15.27	k73.7	rs186524891
6:32157398:A_G	6	32157398	G	A	SNV	INTRONIC	2	intron			ENSG00000204304	ENST00000375050	PBX2		15.27	k73.8	rs186524891
6:32157398:A_G	6	32157398	G	A	SNV	INTRONIC	2	intron			ENSG00000204304	ENST00000375050	PBX2		15.27	k73.4	rs186524891
6:32157398:A_G	6	32157398	G	A	SNV	INTRONIC	2	intron			ENSG00000204304	ENST00000375050	PBX2		15.27	k73.9	rs186524891
6:25850845:C_T	6	25850845	C	T	SNV	NON_SYNONYMOUS	7	missense	G	R	ENSG00000124564	ENST00000397060	SLC17A3	279	16.48	k73.9	rs56027330
6:25850845:C_T	6	25850845	C	T	SNV	NON_SYNONYMOUS	7	missense	G	R	ENSG00000124564	ENST00000397060	SLC17A3	279	16.48	k73.2	rs56027330
6:25850845:C_T	6	25850845	C	T	SNV	NON_SYNONYMOUS	7	missense	G	R	ENSG00000124564	ENST00000397060	SLC17A3	279	16.48	k73.7	rs56027330
6:25850845:C_T	6	25850845	C	T	SNV	NON_SYNONYMOUS	7	missense	G	R	ENSG00000124564	ENST00000397060	SLC17A3	279	16.48	k73.8	rs56027330
6:33282181:A_G	6	33282181	A	G	SNV	DOWNSTREAM	1	downstream			ENSG00000236104	ENST00000431845	ZBTB22		15.36	k73.7	rs3130099
6:33282181:A_G	6	33282181	A	G	SNV	DOWNSTREAM	1	downstream			ENSG00000236104	ENST00000431845	ZBTB22		15.36	k73.5	rs3130099
6:33282181:A_G	6	33282181	A	G	SNV	DOWNSTREAM	1	downstream			ENSG00000236104	ENST00000431845	ZBTB22		15.36	k73.6	rs3130099
6:33282181:A_G	6	33282181	A	G	SNV	DOWNSTREAM	1	downstream			ENSG00000236104	ENST00000431845	ZBTB22		15.36	k73.8	rs3130099
6:33282181:A_G	6	33282181	A	G	SNV	DOWNSTREAM	1	downstream			ENSG00000236104	ENST00000431845	ZBTB22		15.36	k73.9	rs3130099
6:33667839:A_G	6	33667839	A	G	SNV	INTRONIC	2	intron			ENSG00000137288	ENST00000607484	UQCC2		15.14	k73.8	rs4713659
6:33667839:A_G	6	33667839	A	G	SNV	INTRONIC	2	intron			ENSG00000137288	ENST00000607484	UQCC2		15.14	k73.5	rs4713659
6:33667839:A_G	6	33667839	A	G	SNV	INTRONIC	2	intron			ENSG00000137288	ENST00000607484	UQCC2		15.14	k73.7	rs4713659
6:33667839:A_G	6	33667839	A	G	SNV	INTRONIC	2	intron			ENSG00000137288	ENST00000607484	UQCC2		15.14	k73.9	rs4713659
6:33667839:A_G	6	33667839	A	G	SNV	INTRONIC	2	intron			ENSG00000137288	ENST00000607484	UQCC2		15.14	k73.6	rs4713659
6:33673831:A_G	6	33673831	A	G	SNV	INTRONIC	2	intron			ENSG00000137288	ENST00000607484	UQCC2		21	k73.9	rs6457739
6:33673831:A_G	6	33673831	A	G	SNV	INTRONIC	2	intron			ENSG00000137288	ENST00000607484	UQCC2		21	k73.6	rs6457739
6:33673831:A_G	6	33673831	A	G	SNV	INTRONIC	2	intron			ENSG00000137288	ENST00000607484	UQCC2		21	k73.8	rs6457739
6:33673831:A_G	6	33673831	A	G	SNV	INTRONIC	2	intron			ENSG00000137288	ENST00000607484	UQCC2		21	k73.7	rs6457739
6:33673831:A_G	6	33673831	A	G	SNV	INTRONIC	2	intron			ENSG00000137288	ENST00000607484	UQCC2		21	k73.5	rs6457739
6:33689520:C_T	6	33689520	C	T	SNV	3PRIME_UTR	2	3_prime_UTR			ENSG00000161896	ENST00000451316	IP6K3		15.07	k73.7	rs2966
6:33689520:C_T	6	33689520	C	T	SNV	3PRIME_UTR	2	3_prime_UTR			ENSG00000161896	ENST00000451316	IP6K3		15.07	k73.5	rs2966
6:33689520:C_T	6	33689520	C	T	SNV	3PRIME_UTR	2	3_prime_UTR			ENSG00000161896	ENST00000451316	IP6K3		15.07	k73.8	rs2966
6:33689520:C_T	6	33689520	C	T	SNV	3PRIME_UTR	2	3_prime_UTR			ENSG00000161896	ENST00000451316	IP6K3		15.07	k73.9	rs2966
6:33689520:C_T	6	33689520	C	T	SNV	3PRIME_UTR	2	3_prime_UTR			ENSG00000161896	ENST00000451316	IP6K3		15.07	k73.6	rs2966
6:33690796:C_T	6	33690796	C	T	SNV	NON_SYNONYMOUS	7	missense	V	I	ENSG00000161896	ENST00000451316	IP6K3	312	21.7	k73.9	rs4713668
6:33690796:C_T	6	33690796	C	T	SNV	NON_SYNONYMOUS	7	missense	V	I	ENSG00000161896	ENST00000451316	IP6K3	312	21.7	k73.6	rs4713668
6:33690796:C_T	6	33690796	C	T	SNV	NON_SYNONYMOUS	7	missense	V	I	ENSG00000161896	ENST00000451316	IP6K3	312	21.7	k73.8	rs4713668
6:33690796:C_T	6	33690796	C	T	SNV	NON_SYNONYMOUS	7	missense	V	I	ENSG00000161896	ENST00000451316	IP6K3	312	21.7	k73.5	rs4713668
6:33690796:C_T	6	33690796	C	T	SNV	NON_SYNONYMOUS	7	missense	V	I	ENSG00000161896	ENST00000451316	IP6K3	312	21.7	k73.7	rs4713668
6:33708169:A_G	6	33708169	A	G	SNV	INTRONIC	2	intron			ENSG00000161896	ENST00000451316	IP6K3		16.25	k73.9	rs4713674
6:33708169:A_G	6	33708169	A	G	SNV	INTRONIC	2	intron			ENSG00000161896	ENST00000451316	IP6K3		16.25	k73.6	rs4713674
6:33708169:A_G	6	33708169	A	G	SNV	INTRONIC	2	intron			ENSG00000161896	ENST00000451316	IP6K3		16.25	k73.8	rs4713674
6:33708169:A_G	6	33708169	A	G	SNV	INTRONIC	2	intron			ENSG00000161896	ENST00000451316	IP6K3		16.25	k73.7	rs4713674
6:33708169:A_G	6	33708169	A	G	SNV	INTRONIC	2	intron			ENSG00000161896	ENST00000451316	IP6K3		16.25	k73.5	rs4713674
6:26093141:A_G	6	26093141	G	A	SNV	NON_SYNONYMOUS	7	missense	C	Y	ENSG00000010704	ENST00000357618	HFE	282	25.1	k73.6	rs1800562
6:26093141:A_G	6	26093141	G	A	SNV	NON_SYNONYMOUS	7	missense	C	Y	ENSG00000010704	ENST00000357618	HFE	282	25.1	k73.9	rs1800562
6:26093141:A_G	6	26093141	G	A	SNV	NON_SYNONYMOUS	7	missense	C	Y	ENSG00000010704	ENST00000357618	HFE	282	25.1	k73.7	rs1800562
6:26093141:A_G	6	26093141	G	A	SNV	NON_SYNONYMOUS	7	missense	C	Y	ENSG00000010704	ENST00000357618	HFE	282	25.1	k73.8	rs1800562
6:26638417:A_G	6	26638417	G	A	SNV	NON_SYNONYMOUS	7	missense	A	V	ENSG00000181315	ENST00000415922	ZNF322	122	23.6	k73.6	rs111265204
6:26638417:A_G	6	26638417	G	A	SNV	NON_SYNONYMOUS	7	missense	A	V	ENSG00000181315	ENST00000415922	ZNF322	122	23.6	k73.8	rs111265204
6:26638417:A_G	6	26638417	G	A	SNV	NON_SYNONYMOUS	7	missense	A	V	ENSG00000181315	ENST00000415922	ZNF322	122	23.6	k73.9	rs111265204
6:26638417:A_G	6	26638417	G	A	SNV	NON_SYNONYMOUS	7	missense	A	V	ENSG00000181315	ENST00000415922	ZNF322	122	23.6	k73.7	rs111265204
6:28227217:C_T	6	28227217	C	T	SNV	NON_SYNONYMOUS	7	missense	S	F	ENSG00000189134	ENST00000343684	NKAPL	23	15.08	k73.7	rs61737338
6:28227217:C_T	6	28227217	C	T	SNV	NON_SYNONYMOUS	7	missense	S	F	ENSG00000189134	ENST00000343684	NKAPL	23	15.08	k73.8	rs61737338
6:28227217:C_T	6	28227217	C	T	SNV	NON_SYNONYMOUS	7	missense	S	F	ENSG00000189134	ENST00000343684	NKAPL	23	15.08	k73.6	rs61737338
6:28227217:C_T	6	28227217	C	T	SNV	NON_SYNONYMOUS	7	missense	S	F	ENSG00000189134	ENST00000343684	NKAPL	23	15.08	k73.9	rs61737338
6:29323276:C_T	6	29323276	C	T	SNV	NON_SYNONYMOUS	7	missense	G	R	ENSG00000243729	ENST00000377154	OR5V1	233	17.78	k73.8	rs61742983
6:29323276:C_T	6	29323276	C	T	SNV	NON_SYNONYMOUS	7	missense	G	R	ENSG00000243729	ENST00000377154	OR5V1	233	17.78	k73.9	rs61742983
6:29323276:C_T	6	29323276	C	T	SNV	NON_SYNONYMOUS	7	missense	G	R	ENSG00000243729	ENST00000377154	OR5V1	233	17.78	k73.6	rs61742983
6:29323276:C_T	6	29323276	C	T	SNV	NON_SYNONYMOUS	7	missense	G	R	ENSG00000243729	ENST00000377154	OR5V1	233	17.78	k73.7	rs61742983
6:29408090:A_G	6	29408090	A	G	SNV	NON_SYNONYMOUS	7	missense	M	V	ENSG00000206474	ENST00000444197	OR10C1	100	22.4	k73.9	rs17177632
6:29408090:A_G	6	29408090	A	G	SNV	NON_SYNONYMOUS	7	missense	M	V	ENSG00000206474	ENST00000444197	OR10C1	100	22.4	k73.8	rs17177632
6:29408090:A_G	6	29408090	A	G	SNV	NON_SYNONYMOUS	7	missense	M	V	ENSG00000206474	ENST00000444197	OR10C1	100	22.4	k73.7	rs17177632
6:29408090:A_G	6	29408090	A	G	SNV	NON_SYNONYMOUS	7	missense	M	V	ENSG00000206474	ENST00000444197	OR10C1	100	22.4	k73.6	rs17177632
6:29408275:A_C	6	29408275	C	A	SNV	NON_SYNONYMOUS	7	missense	F	L	ENSG00000206474	ENST00000444197	OR10C1	161	18.22	k73.6	rs2074467
6:29408275:A_C	6	29408275	C	A	SNV	NON_SYNONYMOUS	7	missense	F	L	ENSG00000206474	ENST00000444197	OR10C1	161	18.22	k73.9	rs2074467
6:29408275:A_C	6	29408275	C	A	SNV	NON_SYNONYMOUS	7	missense	F	L	ENSG00000206474	ENST00000444197	OR10C1	161	18.22	k73.8	rs2074467
6:29408275:A_C	6	29408275	C	A	SNV	NON_SYNONYMOUS	7	missense	F	L	ENSG00000206474	ENST00000444197	OR10C1	161	18.22	k73.7	rs2074467
6:29430213:A_G	6	29430213	G	A	SNV	NON_SYNONYMOUS	7	missense	V	M	ENSG00000204688	ENST00000377136	OR2H1	223	21.8	k73.7	rs17184086
6:29430213:A_G	6	29430213	G	A	SNV	NON_SYNONYMOUS	7	missense	V	M	ENSG00000204688	ENST00000377136	OR2H1	223	21.8	k73.9	rs17184086
6:29430213:A_G	6	29430213	G	A	SNV	NON_SYNONYMOUS	7	missense	V	M	ENSG00000204688	ENST00000377136	OR2H1	223	21.8	k73.6	rs17184086
6:29430213:A_G	6	29430213	G	A	SNV	NON_SYNONYMOUS	7	missense	V	M	ENSG00000204688	ENST00000377136	OR2H1	223	21.8	k73.8	rs17184086
6:29635410:G_T	6	29635410	T	G	SNV	INTRONIC	2	intron			ENSG00000204655	ENST00000376898	MOG		15.35	k73.9	rs17184514
6:29635410:G_T	6	29635410	T	G	SNV	INTRONIC	2	intron			ENSG00000204655	ENST00000376898	MOG		15.35	k73.6	rs17184514
6:29635410:G_T	6	29635410	T	G	SNV	INTRONIC	2	intron			ENSG00000204655	ENST00000376898	MOG		15.35	k73.7	rs17184514
6:29635410:G_T	6	29635410	T	G	SNV	INTRONIC	2	intron			ENSG00000204655	ENST00000376898	MOG		15.35	k73.8	rs17184514
6:29641329:A_G	6	29641329	G	A	SNV	NON_SYNONYMOUS	7	missense	R	C	ENSG00000204644	ENST00000488757	ZFP57	187	18.98	k73.9	rs61730330
6:29641329:A_G	6	29641329	G	A	SNV	NON_SYNONYMOUS	7	missense	R	C	ENSG00000204644	ENST00000488757	ZFP57	187	18.98	k73.6	rs61730330
6:29641329:A_G	6	29641329	G	A	SNV	NON_SYNONYMOUS	7	missense	R	C	ENSG00000204644	ENST00000488757	ZFP57	187	18.98	k73.7	rs61730330
6:29641329:A_G	6	29641329	G	A	SNV	NON_SYNONYMOUS	7	missense	R	C	ENSG00000204644	ENST00000488757	ZFP57	187	18.98	k73.8	rs61730330
6:30627867:C_T	6	30627867	T	C	SNV	NON_SYNONYMOUS	7	missense	D	G	ENSG00000204560	ENST00000376442	DHX16	566	23.2	k73.8	rs9262138
6:30627867:C_T	6	30627867	T	C	SNV	NON_SYNONYMOUS	7	missense	D	G	ENSG00000204560	ENST00000376442	DHX16	566	23.2	k73.9	rs9262138
6:30627867:C_T	6	30627867	T	C	SNV	NON_SYNONYMOUS	7	missense	D	G	ENSG00000204560	ENST00000376442	DHX16	566	23.2	k73.6	rs9262138
6:30627867:C_T	6	30627867	T	C	SNV	NON_SYNONYMOUS	7	missense	D	G	ENSG00000204560	ENST00000376442	DHX16	566	23.2	k73.7	rs9262138
6:30671726:C_G	6	30671726	G	C	SNV	NON_SYNONYMOUS	7	missense	P	R	ENSG00000137337	ENST00000376406	MDC1	1745	17.76	k73.8	rs28994871
6:30671726:C_G	6	30671726	G	C	SNV	NON_SYNONYMOUS	7	missense	P	R	ENSG00000137337	ENST00000376406	MDC1	1745	17.76	k73.9	rs28994871
6:30671726:C_G	6	30671726	G	C	SNV	NON_SYNONYMOUS	7	missense	P	R	ENSG00000137337	ENST00000376406	MDC1	1745	17.76	k73.6	rs28994871
6:30671726:C_G	6	30671726	G	C	SNV	NON_SYNONYMOUS	7	missense	P	R	ENSG00000137337	ENST00000376406	MDC1	1745	17.76	k73.7	rs28994871
6:30673625:A_G	6	30673625	G	A	SNV	NON_SYNONYMOUS	7	missense	S	F	ENSG00000137337	ENST00000376406	MDC1	1112	15.57	k73.7	rs28987085
6:30673625:A_G	6	30673625	G	A	SNV	NON_SYNONYMOUS	7	missense	S	F	ENSG00000137337	ENST00000376406	MDC1	1112	15.57	k73.9	rs28987085
6:30673625:A_G	6	30673625	G	A	SNV	NON_SYNONYMOUS	7	missense	S	F	ENSG00000137337	ENST00000376406	MDC1	1112	15.57	k73.8	rs28987085
6:30673625:A_G	6	30673625	G	A	SNV	NON_SYNONYMOUS	7	missense	S	F	ENSG00000137337	ENST00000376406	MDC1	1112	15.57	k73.6	rs28987085
6:32610934:A_G	6	32610934	A	G	SNV	3PRIME_UTR	2	3_prime_UTR			ENSG00000196735	ENST00000343139	HLA-DQA1		20.5	k73.7	rs3667
6:32610934:A_G	6	32610934	A	G	SNV	3PRIME_UTR	2	3_prime_UTR			ENSG00000196735	ENST00000343139	HLA-DQA1		20.5	k73.8	rs3667
6:32610934:A_G	6	32610934	A	G	SNV	3PRIME_UTR	2	3_prime_UTR			ENSG00000196735	ENST00000343139	HLA-DQA1		20.5	k73.9	rs3667
6:32610934:A_G	6	32610934	A	G	SNV	3PRIME_UTR	2	3_prime_UTR			ENSG00000196735	ENST00000343139	HLA-DQA1		20.5	k73.6	rs3667
6:33053577:A_G	6	33053577	G	A	SNV	NON_SYNONYMOUS	7	missense	R	Q	ENSG00000223865	ENST00000418931	HLA-DPB1	223	16.77	k73.6	rs9276
6:33053577:A_G	6	33053577	G	A	SNV	NON_SYNONYMOUS	7	missense	R	Q	ENSG00000223865	ENST00000418931	HLA-DPB1	223	16.77	k73.7	rs9276
6:33053577:A_G	6	33053577	G	A	SNV	NON_SYNONYMOUS	7	missense	R	Q	ENSG00000223865	ENST00000418931	HLA-DPB1	223	16.77	k73.8	rs9276
6:33053577:A_G	6	33053577	G	A	SNV	NON_SYNONYMOUS	7	missense	R	Q	ENSG00000223865	ENST00000418931	HLA-DPB1	223	16.77	k73.9	rs9276
6:33239869:C_T	6	33239869	C	T	SNV	5PRIME_UTR	3	5_prime_UTR			ENSG00000231500	ENST00000439602	RPS18		21.9	k73.7	rs17215231
6:33239869:C_T	6	33239869	C	T	SNV	5PRIME_UTR	3	5_prime_UTR			ENSG00000231500	ENST00000439602	RPS18		21.9	k73.8	rs17215231
6:33239869:C_T	6	33239869	C	T	SNV	5PRIME_UTR	3	5_prime_UTR			ENSG00000231500	ENST00000439602	RPS18		21.9	k73.6	rs17215231
6:33239869:C_T	6	33239869	C	T	SNV	5PRIME_UTR	3	5_prime_UTR			ENSG00000231500	ENST00000439602	RPS18		21.9	k73.9	rs17215231
6:34358990:C_G	6	34358990	G	C	SNV	INTRONIC	2	intron			ENSG00000272325	ENST00000607016	NUDT3		15.27	k73.9	rs3798564
6:34358990:C_G	6	34358990	G	C	SNV	INTRONIC	2	intron			ENSG00000270800	ENST00000605528	RPS10-NUDT3		15.27	k73.9	rs3798564
6:34358990:C_G	6	34358990	G	C	SNV	INTRONIC	2	intron			ENSG00000270800	ENST00000605528	RPS10-NUDT3		15.27	k73.7	rs3798564
6:34358990:C_G	6	34358990	G	C	SNV	INTRONIC	2	intron			ENSG00000272325	ENST00000607016	NUDT3		15.27	k73.7	rs3798564
6:34358990:C_G	6	34358990	G	C	SNV	INTRONIC	2	intron			ENSG00000270800	ENST00000605528	RPS10-NUDT3		15.27	k73.8	rs3798564
6:34358990:C_G	6	34358990	G	C	SNV	INTRONIC	2	intron			ENSG00000270800	ENST00000605528	RPS10-NUDT3		15.27	k73.6	rs3798564
6:34358990:C_G	6	34358990	G	C	SNV	INTRONIC	2	intron			ENSG00000272325	ENST00000607016	NUDT3		15.27	k73.6	rs3798564
6:34358990:C_G	6	34358990	G	C	SNV	INTRONIC	2	intron			ENSG00000272325	ENST00000607016	NUDT3		15.27	k73.8	rs3798564
6:34393845:A_G	6	34393845	G	A	SNV	5PRIME_UTR	3	5_prime_UTR			ENSG00000124614	ENST00000326199	RPS10		16.85	k73.6	rs9469779
6:34393845:A_G	6	34393845	G	A	SNV	5PRIME_UTR	3	5_prime_UTR			ENSG00000124614	ENST00000326199	RPS10		16.85	k73.7	rs9469779
6:34393845:A_G	6	34393845	G	A	SNV	UPSTREAM	1	upstream			ENSG00000270800	ENST00000605528	RPS10-NUDT3		16.85	k73.7	rs9469779
6:34393845:A_G	6	34393845	G	A	SNV	UPSTREAM	1	upstream			ENSG00000270800	ENST00000605528	RPS10-NUDT3		16.85	k73.9	rs9469779
6:34393845:A_G	6	34393845	G	A	SNV	UPSTREAM	1	upstream			ENSG00000270800	ENST00000605528	RPS10-NUDT3		16.85	k73.6	rs9469779
6:34393845:A_G	6	34393845	G	A	SNV	5PRIME_UTR	3	5_prime_UTR			ENSG00000124614	ENST00000326199	RPS10		16.85	k73.8	rs9469779
6:34393845:A_G	6	34393845	G	A	SNV	UPSTREAM	1	upstream			ENSG00000270800	ENST00000605528	RPS10-NUDT3		16.85	k73.8	rs9469779
6:34393845:A_G	6	34393845	G	A	SNV	5PRIME_UTR	3	5_prime_UTR			ENSG00000124614	ENST00000326199	RPS10		16.85	k73.9	rs9469779
6:34824107:A_C	6	34824107	A	C	SNV	NON_SYNONYMOUS	7	missense	K	N	ENSG00000065060	ENST00000192788	BLTP3A	404	18.97	k73.9	rs16894945
6:34824107:A_C	6	34824107	A	C	SNV	NON_SYNONYMOUS	7	missense	K	N	ENSG00000065060	ENST00000192788	BLTP3A	404	18.97	k73.8	rs16894945
6:34824636:A_G	6	34824636	A	G	SNV	NON_SYNONYMOUS	7	missense	Q	R	ENSG00000065060	ENST00000192788	BLTP3A	454	16.09	k73.8	rs11755393
6:34824636:A_G	6	34824636	A	G	SNV	NON_SYNONYMOUS	7	missense	Q	R	ENSG00000065060	ENST00000192788	BLTP3A	454	16.09	k73.9	rs11755393
6:34831856:C_T	6	34831856	T	C	SNV	NON_SYNONYMOUS	7	missense	M	T	ENSG00000065060	ENST00000192788	BLTP3A	1098	23.6	k73.9	rs13205210
6:34831856:C_T	6	34831856	T	C	SNV	NON_SYNONYMOUS	7	missense	M	T	ENSG00000065060	ENST00000192788	BLTP3A	1098	23.6	k73.8	rs13205210
6:34850826:C_G	6	34850826	G	C	SNV	NON_SYNONYMOUS	7	missense	T	R	ENSG00000064995	ENST00000361288	TAF11	68	22.7	k73.9	rs15922
6:34850826:C_G	6	34850826	G	C	SNV	NON_SYNONYMOUS	7	missense	T	R	ENSG00000064995	ENST00000361288	TAF11	68	22.7	k73.8	rs15922
6:34858578:A_G	6	34858578	A	G	SNV	INTRONIC	2	intron			ENSG00000064999	ENST00000360359	ANKS1A		16.51	k73.9	rs3756857
6:34858578:A_G	6	34858578	A	G	SNV	INTRONIC	2	intron			ENSG00000064999	ENST00000360359	ANKS1A		16.51	k73.8	rs3756857
6:34897174:G_T	6	34897174	G	T	SNV	INTRONIC	2	intron			ENSG00000064999	ENST00000360359	ANKS1A		15.05	k73.9	rs6457797
6:34897174:G_T	6	34897174	G	T	SNV	INTRONIC	2	intron			ENSG00000064999	ENST00000360359	ANKS1A		15.05	k73.8	rs6457797
6:34940344:A_T	6	34940344	T	A	SNV	INTRONIC	2	intron			ENSG00000064999	ENST00000360359	ANKS1A		19.13	k73.9	rs114463080
6:34940344:A_T	6	34940344	T	A	SNV	INTRONIC	2	intron			ENSG00000064999	ENST00000360359	ANKS1A		19.13	k73.8	rs114463080
6:35016437:G_T	6	35016437	T	G	SNV	INTRONIC	2	intron			ENSG00000064999	ENST00000360359	ANKS1A		15.82	k73.8	rs114825291
6:35016437:G_T	6	35016437	T	G	SNV	INTRONIC	2	intron			ENSG00000064999	ENST00000360359	ANKS1A		15.82	k73.9	rs114825291
5:39378115:C_T	5	39378115	C	T	SNV	INTRONIC	2	intron			ENSG00000153071	ENST00000320816	DAB2		19.14	k8.1	rs1362800
1:110023432:A_G	1	110023432	G	A	SNV	3PRIME_UTR	2	3_prime_UTR			ENSG00000143028	ENST00000369872	SYPL2		15.05	k80.1	rs485660
1:109817838:C_T	1	109817838	T	C	SNV	3PRIME_UTR	2	3_prime_UTR			ENSG00000143126	ENST00000271332	CELSR2		15.41	k80.2	rs660240
2:43451957:A_G	2	43451957	G	A	SNV	NON_SYNONYMOUS	7	missense	A	V	ENSG00000152518	ENST00000282388	ZFP36L2	329	18.39	k82.2	rs149290349
2:43453721:A_G	2	43453721	G	A	SNV	5PRIME_UTR	3	5_prime_UTR			ENSG00000152518	ENST00000282388	ZFP36L2		19.54	k82.2	rs112694524
2:43519977:C_T	2	43519977	C	T	SNV	NON_SYNONYMOUS	7	missense	C	Y	ENSG00000115970	ENST00000405006	THADA	1605	22.2	k82.2	rs35720761
2:43586287:G_T	2	43586287	T	G	SNV	INTRONIC	2	intron			ENSG00000115970	ENST00000405006	THADA		15.28	k82.2	rs6743071
2:43598160:A_G	2	43598160	A	G	SNV	INTRONIC	2	intron			ENSG00000115970	ENST00000405006	THADA		17.45	k82.2	rs78681698
2:43602932:G_T	2	43602932	T	G	SNV	INTRONIC	2	intron			ENSG00000115970	ENST00000405006	THADA		20.2	k82.2	rs79629200
2:43687542:C_T	2	43687542	T	C	SNV	INTRONIC	2	intron			ENSG00000115970	ENST00000405006	THADA		17.44	k82.2	rs6746058
2:43732823:C_T	2	43732823	T	C	SNV	NON_SYNONYMOUS	7	missense	T	A	ENSG00000115970	ENST00000405006	THADA	1187	23.4	k82.2	rs7578597
2:43748983:A_G	2	43748983	G	A	SNV	INTRONIC	2	intron			ENSG00000115970	ENST00000405006	THADA		18.07	k82.2	rs17030967
2:43749436:G_T	2	43749436	T	G	SNV	INTRONIC	2	intron			ENSG00000115970	ENST00000405006	THADA		17.03	k82.2	rs6753942
2:43751480:C_T	2	43751480	T	C	SNV	INTRONIC	2	intron			ENSG00000115970	ENST00000405006	THADA		15.43	k82.2	rs17030980
16:53163796:C_T	16	53163796	T	C	SNV	INTRONIC	2	intron			ENSG00000177200	ENST00000566029	CHD9		16.58	k83.1	rs62047987
16:53211665:A_G	16	53211665	G	A	SNV	INTRONIC	2	intron			ENSG00000177200	ENST00000566029	CHD9		16.32	k83.1	rs12596062
16:53241763:A_G	16	53241763	G	A	SNV	INTRONIC	2	intron			ENSG00000177200	ENST00000566029	CHD9		17.35	k83.1	rs62048054
16:53246553:A_G	16	53246553	G	A	SNV	INTRONIC	2	intron			ENSG00000177200	ENST00000566029	CHD9		15.93	k83.1	rs62048058
6:7109665:C_G	6	7109665	C	G	SNV	INTRONIC	2	intron			ENSG00000124782	ENST00000379938	RREB1		17.98	k84.1	rs3904600
12:57843711:A_G	12	57843711	G	A	SNV	NON_SYNONYMOUS	7	missense	R	Q	ENSG00000175189	ENST00000309668	INHBC	322	17.63	k91.1	rs2229357
12:57146069:G_T	12	57146069	T	G	SNV	NON_SYNONYMOUS	7	missense	D	A	ENSG00000198056	ENST00000338193	PRIM1	5	28.5	k91.3	rs2277339
5:34706321:C_T	5	34706321	C	T	SNV	INTRONIC	2	intron			ENSG00000039560	ENST00000515799	RAI14		15.84	k92.2	rs10036600
6:133789728:A_G	6	133789728	G	A	SNV	NON_SYNONYMOUS	7	missense	G	S	ENSG00000112319	ENST00000367895	EYA4	277	25.6	k96.1	rs9493627
20:56137895:C_G	20	56137895	G	C	SNV	NON_SYNONYMOUS	7	missense	V	L	ENSG00000124253	ENST00000319441	PCK1	184	15.32	k97.1	rs707555
20:62328375:A_G	20	62328375	A	G	SNV	SYNONYMOUS	5	synonymous	L	L	ENSG00000243509	ENST00000369996	TNFRSF6B	85	20.4	k99.3	rs2738787
20:62328375:A_G	20	62328375	A	G	SNV	SYNONYMOUS	5	synonymous	L	L	ENSG00000243509	ENST00000369996	TNFRSF6B	85	20.4	k99.4	rs2738787
20:62328375:A_G	20	62328375	A	G	SNV	NON_SYNONYMOUS	7	NMD,missense	R	G	ENSG00000026036	ENST00000482936	RTEL1-TNFRSF6B	1388	20.4	k99.4	rs2738787
20:62328375:A_G	20	62328375	A	G	SNV	NON_SYNONYMOUS	7	NMD,missense	R	G	ENSG00000026036	ENST00000482936	RTEL1-TNFRSF6B	1388	20.4	k99.3	rs2738787
20:62340115:C_G	20	62340115	C	G	SNV	NON_SYNONYMOUS	7	missense	S	R	ENSG00000197114	ENST00000328969	ZGPAT	61	16.67	k99.3	rs1291212
20:62340115:C_G	20	62340115	C	G	SNV	NON_SYNONYMOUS	7	missense	S	R	ENSG00000197114	ENST00000328969	ZGPAT	61	16.67	k99.4	rs1291212
8:145018354:C_T	8	145018354	C	T	SNV	INTRONIC	2	intron			ENSG00000178209	ENST00000322810	PLEC		16.1	n1.1	rs11786896
14:73355131:C_T	14	73355131	T	C	SNV	INTRONIC	2	intron			ENSG00000205683	ENST00000541685	DPF3		20.3	n10.1	rs2110552
14:73355131:C_T	14	73355131	T	C	SNV	INTRONIC	2	intron			ENSG00000205683	ENST00000541685	DPF3		20.3	n10.2	rs2110552
9:95887320:G_T	9	95887320	G	T	SNV	NON_SYNONYMOUS	7	missense	A	D	ENSG00000131669	ENST00000375446	NINJ1	110	22.3	n101.1	rs2275848
7:27221227:C_T	7	27221227	C	T	SNV	3PRIME_UTR	2	3_prime_UTR			ENSG00000005073	ENST00000006015	HOXA11		16.05	n102.1	rs67971665
7:27225619:C_T	7	27225619	C	T	SNV	INTRONIC	2	intron,non_coding			ENSG00000240990	ENST00000522863	HOXA11-AS		21.8	n102.1	rs189589409
7:27239201:G_T	7	27239201	G	T	SNV	NON_SYNONYMOUS	7	missense	P	T	ENSG00000106031	ENST00000222753	HOXA13	166	22.2	n102.1	rs34398255
14:35459315:A_T	14	35459315	T	A	SNV	INTRONIC	2	intron			ENSG00000100883	ENST00000556994	SRP54		15.03	n108.1	rs7154181
14:35546498:A_T	14	35546498	T	A	SNV	INTRONIC	2	intron			ENSG00000151327	ENST00000280987	FAM177A1		15.53	n108.1	rs8011242
14:35638937:A_G	14	35638937	G	A	SNV	INTRONIC	2	intron			ENSG00000100890	ENST00000534898	PRORP		15.34	n108.1	rs2415269
14:35638937:A_G	14	35638937	G	A	SNV	INTRONIC	2	intron,NMD			ENSG00000258790	ENST00000557565	PRORP		15.34	n108.1	rs2415269
3:69861423:A_G	3	69861423	G	A	SNV	INTRONIC	2	intron			ENSG00000187098	ENST00000352241	MITF		16.76	n112.1	rs55808455
3:69868530:C_T	3	69868530	C	T	SNV	INTRONIC	2	intron			ENSG00000187098	ENST00000352241	MITF		20.9	n112.1	rs34165775
3:69869653:A_G	3	69869653	A	G	SNV	INTRONIC	2	intron			ENSG00000187098	ENST00000352241	MITF		19.94	n112.1	rs6778747
3:69870465:A_T	3	69870465	T	A	SNV	INTRONIC	2	intron			ENSG00000187098	ENST00000352241	MITF		18.65	n112.1	rs1897159
3:69870595:A_G	3	69870595	A	G	SNV	INTRONIC	2	intron			ENSG00000187098	ENST00000352241	MITF		19.46	n112.1	rs1529585
4:49063872:A_C	4	49063872	C	A	SNV	NON_SYNONYMOUS	7	missense	H	N	ENSG00000109182	ENST00000226432	CWH43	689	23.9	n114.1	rs1051447
14:80746058:A_G	14	80746058	A	G	SNV	INTRONIC	2	intron,non_coding			ENSG00000258766	ENST00000553979	DIO2-AS1		18.26	n115.1	rs185538102
14:37891712:A_G	14	37891712	A	G	SNV	INTRONIC	2	intron			ENSG00000151338	ENST00000327441	MIPOL1		18.63	n12.1	rs8022848
14:37898410:A_G	14	37898410	A	G	SNV	INTRONIC	2	intron			ENSG00000151338	ENST00000327441	MIPOL1		15.03	n12.1	rs17768249
14:37999686:A_T	14	37999686	A	T	SNV	INTRONIC	2	intron			ENSG00000151338	ENST00000327441	MIPOL1		16.76	n12.1	rs12881012
12:67707441:A_G	12	67707441	A	G	SNV	3PRIME_UTR	2	3_prime_UTR			ENSG00000111530	ENST00000545606	CAND1		15.29	n122.1	rs1137465
10:90282582:C_T	10	90282582	T	C	SNV	INTRONIC	2	intron			ENSG00000184719	ENST00000331772	RNLS		16.22	n124.1	rs2765456
2:213083282:A_G	2	213083282	A	G	SNV	INTRONIC	2	intron			ENSG00000178568	ENST00000342788	ERBB4		17.41	n126.1	rs10048673
2:213083326:C_G	2	213083326	C	G	SNV	INTRONIC	2	intron			ENSG00000178568	ENST00000342788	ERBB4		16.61	n126.1	rs10048796
2:213096239:C_G	2	213096239	C	G	SNV	INTRONIC	2	intron			ENSG00000178568	ENST00000342788	ERBB4		20.8	n126.1	rs4233985
2:213130540:G_T	2	213130540	G	T	SNV	INTRONIC	2	intron			ENSG00000178568	ENST00000342788	ERBB4		15.21	n126.1	rs6745160
2:213130571:A_G	2	213130571	G	A	SNV	INTRONIC	2	intron			ENSG00000178568	ENST00000342788	ERBB4		16.68	n126.1	rs6745249
15:49748613:A_G	15	49748613	G	A	SNV	INTRONIC	2	intron			ENSG00000166262	ENST00000299338	FAM227B		15.08	n127.1	rs17479289
15:49748613:A_G	15	49748613	G	A	SNV	INTRONIC	2	intron			ENSG00000140285	ENST00000267843	FGF7		15.08	n127.1	rs17479289
9:112219474:C_G	9	112219474	C	G	SNV	NON_SYNONYMOUS	7	missense	A	P	ENSG00000070159	ENST00000374541	PTPN3	90	21.6	n128.1	rs3793524
5:90417593:C_T	5	90417593	T	C	SNV	INTRONIC	2	intron			ENSG00000164199	ENST00000405460	ADGRV1		16.44	n130.1	rs2973444
2:145634153:A_G	2	145634153	G	A	SNV	INTRONIC	2	intron,non_coding			ENSG00000226674	ENST00000445791	TEX41		17.65	n133.1	rs6738560
2:145653287:A_T	2	145653287	A	T	SNV	INTRONIC	2	intron,non_coding			ENSG00000226674	ENST00000445791	TEX41		21.2	n133.1	rs17479393
2:145672842:A_T	2	145672842	T	A	SNV	INTRONIC	2	intron,non_coding			ENSG00000226674	ENST00000445791	TEX41		19.47	n133.1	rs4508546
14:67850377:A_G	14	67850377	G	A	SNV	3PRIME_UTR	2	3_prime_UTR			ENSG00000134001	ENST00000256383	EIF2S1		17.19	n134.1	rs116606923
14:67862269:A_G	14	67862269	G	A	SNV	NON_SYNONYMOUS	7	missense	T	M	ENSG00000100558	ENST00000216446	PLEK2	80	22.6	n134.1	rs34300264
14:67878765:A_G	14	67878765	G	A	SNV	SYNONYMOUS	5	synonymous	G	G	ENSG00000100558	ENST00000216446	PLEK2	4	15.14	n134.1	rs115017102
14:68005334:A_G	14	68005334	A	G	SNV	INTRONIC	2	intron			ENSG00000054690	ENST00000329153	PLEKHH1		16.27	n134.1	rs4144498
14:68024134:A_T	14	68024134	A	T	SNV	NON_SYNONYMOUS	7	splice,missense	Q	L	ENSG00000054690	ENST00000329153	PLEKHH1	113	32	n134.1	rs3825723
14:68035879:A_G	14	68035879	A	G	SNV	NON_SYNONYMOUS	7	missense	T	A	ENSG00000054690	ENST00000329153	PLEKHH1	430	17.94	n134.1	rs3825725
14:68053807:G_T	14	68053807	T	G	SNV	NON_SYNONYMOUS	7	missense	F	C	ENSG00000054690	ENST00000329153	PLEKHH1	1317	25.1	n134.1	rs118013098
14:68054607:C_G	14	68054607	G	C	SNV	3PRIME_UTR	2	3_prime_UTR			ENSG00000054690	ENST00000329153	PLEKHH1		15.86	n134.1	rs117303644
14:68168886:A_T	14	68168886	A	T	SNV	INTRONIC	2	intron			ENSG00000139988	ENST00000551171	RDH12		15.06	n134.1	rs72723150
14:68219200:C_T	14	68219200	C	T	SNV	NON_SYNONYMOUS	7	missense	R	H	ENSG00000072121	ENST00000347230	ZFYVE26	2411	24.2	n134.1	rs34373049
14:68256184:C_G	14	68256184	C	G	SNV	NON_SYNONYMOUS	7	missense	V	L	ENSG00000072121	ENST00000347230	ZFYVE26	963	19.54	n134.1	rs116890187
14:68265135:A_G	14	68265135	G	A	SNV	NON_SYNONYMOUS	7	missense	S	F	ENSG00000072121	ENST00000347230	ZFYVE26	615	24.8	n134.1	rs117228915
14:68331333:C_T	14	68331333	T	C	SNV	INTRONIC	2	intron			ENSG00000182185	ENST00000487270	RAD51B		15.12	n134.1	rs78320382
1:54199484:C_T	1	54199484	C	T	SNV	INTRONIC	2	intron			ENSG00000174332	ENST00000312233	GLIS1		18.54	n137.1	rs12075528
21:46931109:A_G	21	46931109	G	A	SNV	NON_SYNONYMOUS	7	missense	D	N	ENSG00000182871	ENST00000355480	COL18A1	1440	26.6	n138.1	rs12483377
12:121416864:C_T	12	121416864	C	T	SNV	NON_SYNONYMOUS	7	missense	A	V	ENSG00000135100	ENST00000257555	HNF1A	98	22.7	n14.1	rs1800574
3:183976103:C_T	3	183976103	C	T	SNV	INTRONIC	2	intron			ENSG00000145194	ENST00000402825	ECE2		19.36	n140.1	rs11546878
4:5785442:A_G	4	5785442	G	A	SNV	NON_SYNONYMOUS	7	missense	R	Q	ENSG00000072840	ENST00000382674	EVC	576	24.4	n141.1	rs1383180
4:5800494:A_G	4	5800494	G	A	SNV	NON_SYNONYMOUS	7	missense	R	Q	ENSG00000072840	ENST00000382674	EVC	760	22.2	n141.1	rs2279252
6:106978190:C_T	6	106978190	C	T	SNV	NON_SYNONYMOUS	7	splice,missense	T	M	ENSG00000112297	ENST00000369066	CRYBG1	1165	22.4	n142.1	rs78055257
6:106987370:A_C	6	106987370	A	C	SNV	NON_SYNONYMOUS	7	missense	E	A	ENSG00000112297	ENST00000369066	CRYBG1	1196	18.87	n142.1	rs783396
6:106991361:C_T	6	106991361	T	C	SNV	NON_SYNONYMOUS	7	missense	L	P	ENSG00000112297	ENST00000369066	CRYBG1	1235	25	n142.1	rs61741114
6:107023005:A_C	6	107023005	A	C	SNV	INTRONIC	2	intron			ENSG00000130347	ENST00000369063	RTN4IP1		15.95	n142.1	rs6926307
6:107077502:A_G	6	107077502	G	A	SNV	5PRIME_UTR	3	5_prime_UTR			ENSG00000130348	ENST00000369046	QRSL1		15.01	n142.1	rs2054365
6:107088231:C_T	6	107088231	C	T	SNV	NON_SYNONYMOUS	7	missense	A	V	ENSG00000130348	ENST00000369046	QRSL1	11	21.6	n142.1	rs36016898
6:107089584:C_T	6	107089584	T	C	SNV	INTRONIC	2	intron			ENSG00000130348	ENST00000369046	QRSL1		18.67	n142.1	rs12214412
6:107098087:G_T	6	107098087	T	G	SNV	INTRONIC	2	intron			ENSG00000130348	ENST00000369046	QRSL1		18.81	n142.1	rs3804345
15:65676726:C_T	15	65676726	C	T	SNV	NON_SYNONYMOUS	7	missense	C	Y	ENSG00000103742	ENST00000352385	IGDCC4	1125	24.7	n144.1	rs33918653
15:65684690:C_T	15	65684690	T	C	SNV	NON_SYNONYMOUS	7	missense	E	G	ENSG00000103742	ENST00000352385	IGDCC4	635	32	n144.1	rs75405617
15:66084407:G_T	15	66084407	G	T	SNV	5PRIME_UTR	3	5_prime_UTR			ENSG00000174485	ENST00000443035	DENND4A		16.34	n144.1	rs1369312
4:95496882:C_T	4	95496882	C	T	SNV	INTRONIC	2	intron			ENSG00000163110	ENST00000514743	PDLIM5		18.94	n147.1	rs2452600
9:130742762:A_C	9	130742762	A	C	SNV	5PRIME_UTR	3	5_prime_UTR			ENSG00000167106	ENST00000373095	FAM102A		17.19	n148.1	rs79356092
8:121013770:A_G	8	121013770	A	G	SNV	NON_SYNONYMOUS	7	missense	N	S	ENSG00000155792	ENST00000286234	DEPTOR	204	17.12	n15.2	rs2271900
6:131148737:A_G	6	131148737	G	A	SNV	NON_SYNONYMOUS	7	missense	V	M	ENSG00000256162	ENST00000541421	SMLR1	62	22.4	n150.1	rs1044303
6:131152851:A_G	6	131152851	G	A	SNV	INTRONIC	2	intron			ENSG00000256162	ENST00000541421	SMLR1		17.54	n150.1	rs2281490
5:126307610:C_T	5	126307610	C	T	SNV	INTRONIC	2	intron			ENSG00000173926	ENST00000308660	MARCHF3		18.4	n152.1	rs4836307
5:126324100:C_T	5	126324100	C	T	SNV	INTRONIC	2	intron			ENSG00000173926	ENST00000308660	MARCHF3		16.95	n152.1	rs10057084
5:126347544:A_G	5	126347544	G	A	SNV	INTRONIC	2	intron			ENSG00000173926	ENST00000308660	MARCHF3		19.11	n152.1	rs9327428
5:126360675:A_G	5	126360675	G	A	SNV	INTRONIC	2	intron			ENSG00000173926	ENST00000308660	MARCHF3		18.28	n152.1	rs7706333
3:57542173:C_T	3	57542173	C	T	SNV	NON_SYNONYMOUS	7	missense	R	W	ENSG00000174840	ENST00000311180	PDE12	23	22.4	n153.1	rs2241988
3:57557124:A_G	3	57557124	A	G	SNV	3PRIME_UTR	2	3_prime_UTR			ENSG00000168374	ENST00000303436	ARF4		15.51	n153.1	rs6908
3:57557134:A_T	3	57557134	T	A	SNV	3PRIME_UTR	2	3_prime_UTR			ENSG00000168374	ENST00000303436	ARF4		16.05	n153.1	rs6907
3:57561598:A_G	3	57561598	A	G	SNV	INTRONIC	2	intron			ENSG00000168374	ENST00000303436	ARF4		15.05	n153.1	rs6808217
22:19109955:A_G	22	19109955	G	A	SNV	5PRIME_UTR	3	5_prime_UTR			ENSG00000070413	ENST00000263196	DGCR2		17.38	n154.1	rs2283643
16:30102802:C_T	16	30102802	T	C	SNV	INTRONIC	2	intron			ENSG00000149922	ENST00000395224	TBX6		18.7	n155.1	rs3809624
2:204154552:C_T	2	204154552	C	T	SNV	NON_SYNONYMOUS	7	missense	L	F	ENSG00000119004	ENST00000356079	CYP20A1	346	24.2	n159.1	rs1048013
4:144355290:C_G	4	144355290	G	C	SNV	INTRONIC	2	intron			ENSG00000109458	ENST00000262995	GAB1		21.9	n16.1	rs139323761
14:103931879:A_G	14	103931879	A	G	SNV	INTRONIC	2	intron			ENSG00000075413	ENST00000429436	MARK3		18.69	n160.1	rs1116095
16:84256410:C_T	16	84256410	C	T	SNV	NON_SYNONYMOUS	7	missense	G	R	ENSG00000168418	ENST00000308251	KCNG4	325	16.54	n162.1	rs7196482
16:84270476:A_G	16	84270476	G	A	SNV	NON_SYNONYMOUS	7	missense	R	W	ENSG00000168418	ENST00000308251	KCNG4	206	18.84	n162.1	rs11646443
11:70007770:C_T	11	70007770	T	C	SNV	NON_SYNONYMOUS	7	missense	F	S	ENSG00000131620	ENST00000355303	ANO1	608	27.6	n163.1	rs2186797
1:245462248:C_T	1	245462248	C	T	SNV	INTRONIC	2	intron			ENSG00000162849	ENST00000407071	KIF26B		18.07	n165.1	rs6665809
4:38674260:C_G	4	38674260	C	G	SNV	INTRONIC	2	intron			ENSG00000109787	ENST00000261438	KLF3		16.57	n166.1	rs2927270
17:4803711:A_G	17	4803711	G	A	SNV	INTRONIC	2	intron			ENSG00000108556	ENST00000293780	CHRNE		39	n167.1	rs35400274
17:4803711:A_G	17	4803711	G	A	SNV	STOP_GAINED	8	stop_gained	W	*	ENSG00000205710	ENST00000381365	C17orf107	152	39	n167.1	rs35400274
17:4890843:C_T	17	4890843	T	C	SNV	UPSTREAM	1	upstream			ENSG00000108509	ENST00000414043	CAMTA2		21.8	n167.1	rs8071428
3:15686693:C_G	3	15686693	G	C	SNV	NON_SYNONYMOUS	7	missense	D	H	ENSG00000169814	ENST00000303498	BTD	444	23.1	n168.1	rs13078881
3:15719049:C_T	3	15719049	T	C	SNV	NON_SYNONYMOUS	7	missense	S	G	ENSG00000206560	ENST00000399451	ANKRD28	880	22.9	n168.1	rs34208188
8:17434560:C_G	8	17434560	G	C	SNV	INTRONIC	2	intron			ENSG00000104213	ENST00000541323	PDGFRL		16.5	n170.1	rs117328805
3:152016969:C_T	3	152016969	C	T	SNV	INTRONIC	2	intron			ENSG00000152601	ENST00000282486	MBNL1		19.5	n172.1	rs1426383
3:152181040:C_T	3	152181040	T	C	SNV	3PRIME_UTR	2	3_prime_UTR			ENSG00000152601	ENST00000282486	MBNL1		17.51	n172.1	rs1801769
3:152183512:C_T	3	152183512	T	C	SNV	3PRIME_UTR	2	3_prime_UTR			ENSG00000152601	ENST00000282486	MBNL1		16.17	n172.1	rs7221
4:96106322:A_G	4	96106322	A	G	SNV	NON_SYNONYMOUS	7	missense	M	T	ENSG00000182168	ENST00000453304	UNC5C	721	22.3	n173.1	rs2289043
4:96117371:A_T	4	96117371	A	T	SNV	INTRONIC	2	intron			ENSG00000182168	ENST00000453304	UNC5C		20.6	n173.1	rs3775058
4:96172075:A_G	4	96172075	G	A	SNV	INTRONIC	2	intron			ENSG00000182168	ENST00000453304	UNC5C		17.33	n173.1	rs4699415
11:32956492:C_T	11	32956492	C	T	SNV	NON_SYNONYMOUS	7	missense	R	C	ENSG00000060749	ENST00000399302	QSER1	1101	29.3	n175.1	rs62618693
3:129599205:A_G	3	129599205	A	G	SNV	5PRIME_UTR	3	5_prime_UTR			ENSG00000172765	ENST00000393238	TMCC1		15.7	n177.1	rs61746150
8:135611117:A_G	8	135611117	G	A	SNV	INTRONIC	2	intron,non_coding			ENSG00000248492	ENST00000505776	ZFAT-AS1		15.04	n179.1	rs6982146
8:135611117:A_G	8	135611117	G	A	SNV	INTRONIC	2	intron			ENSG00000066827	ENST00000377838	ZFAT		15.04	n179.1	rs6982146
8:135612745:A_G	8	135612745	A	G	SNV	NONCODING_CHANGE	5	non_coding_exon			ENSG00000248492	ENST00000505776	ZFAT-AS1		16.56	n179.1	rs894344
8:135612745:A_G	8	135612745	A	G	SNV	SYNONYMOUS	5	synonymous	D	D	ENSG00000066827	ENST00000377838	ZFAT	803	16.56	n179.1	rs894344
2:208441776:C_T	2	208441776	C	T	SNV	INTRONIC	2	intron			ENSG00000118260	ENST00000432329	CREB1		15.36	n180.1	rs2551923
2:208467997:A_G	2	208467997	A	G	SNV	3PRIME_UTR	2	3_prime_UTR			ENSG00000118260	ENST00000432329	CREB1		18.63	n180.1	rs6785
2:208477852:A_G	2	208477852	G	A	SNV	NON_SYNONYMOUS	7	missense	T	I	ENSG00000144401	ENST00000411432	METTL21A	192	19.21	n180.1	rs2551949
11:17025712:A_G	11	17025712	G	A	SNV	INTRONIC	2	intron			ENSG00000166689	ENST00000355661	PLEKHA7		15.18	n182.1	rs4757483
22:28186775:C_T	22	28186775	T	C	SNV	INTRONIC	2	intron			ENSG00000169184	ENST00000302326	MN1		15.84	n183.1	rs28566624
22:28190414:A_T	22	28190414	A	T	SNV	INTRONIC	2	intron			ENSG00000169184	ENST00000302326	MN1		19.12	n183.1	rs5762358
10:116622339:A_G	10	116622339	A	G	SNV	3PRIME_UTR	2	3_prime_UTR			ENSG00000151553	ENST00000369248	FHIP2A		15.92	n184.1	rs41284358
10:116630048:A_T	10	116630048	A	T	SNV	INTRONIC	2	intron			ENSG00000151553	ENST00000369250	FHIP2A		15.38	n184.1	rs10885620
10:116634651:C_T	10	116634651	T	C	SNV	INTRONIC	2	intron			ENSG00000151553	ENST00000369250	FHIP2A		16.48	n184.1	rs7072356
10:116719543:A_G	10	116719543	G	A	SNV	NON_SYNONYMOUS	7	missense	R	K	ENSG00000165832	ENST00000298746	TRUB1	167	16.66	n184.1	rs7099565
10:116734069:C_G	10	116734069	G	C	SNV	INTRONIC	2	intron			ENSG00000165832	ENST00000298746	TRUB1		19.72	n184.1	rs6585312
10:111969133:A_C	10	111969133	C	A	SNV	INTRONIC	2	intron			ENSG00000119950	ENST00000332674	MXI1		19.44	n185.1	rs72830443
18:32621231:A_G	18	32621231	A	G	SNV	UPSTREAM	1	upstream			ENSG00000166974	ENST00000300249	MAPRE2		20.4	n186.1	rs530081
5:16898070:C_T	5	16898070	C	T	SNV	INTRONIC	2	intron			ENSG00000145555	ENST00000513610	MYO10		18.7	n188.1	rs253484
9:103340369:A_G	9	103340369	G	A	SNV	5PRIME_UTR	3	5_prime_UTR			ENSG00000170681	ENST00000307584	CAVIN4		15.24	n191.1	rs1226590
9:103341081:A_G	9	103341081	A	G	SNV	INTRONIC	2	intron			ENSG00000170681	ENST00000307584	CAVIN4		17.31	n191.1	rs1226587
22:24133570:A_G	22	24133570	G	A	SNV	INTRONIC	2	intron			ENSG00000099956	ENST00000263121	SMARCB1		18.78	n192.1	rs2073390
22:24134394:C_T	22	24134394	T	C	SNV	INTRONIC	2	intron			ENSG00000099956	ENST00000263121	SMARCB1		20.3	n192.1	rs5760022
5:76781324:C_T	5	76781324	C	T	SNV	INTRONIC	2	intron			ENSG00000164253	ENST00000296679	WDR41		19.66	n193.1	rs163031
5:76781471:A_C	5	76781471	A	C	SNV	INTRONIC	2	intron			ENSG00000164253	ENST00000296679	WDR41		19.55	n193.1	rs163030
5:76781724:A_T	5	76781724	A	T	SNV	INTRONIC	2	intron			ENSG00000164253	ENST00000296679	WDR41		19.16	n193.1	rs163029
5:76926578:C_T	5	76926578	T	C	SNV	SYNONYMOUS	5	synonymous	K	K	ENSG00000171540	ENST00000306422	OTP	163	15.83	n193.1	rs13357072
3:142742285:A_G	3	142742285	A	G	SNV	INTRONIC	2	intron			ENSG00000163714	ENST00000473835	U2SURP		17.79	n197.1	rs2290549
17:29623288:C_T	17	29623288	C	T	SNV	NON_SYNONYMOUS	7	missense	G	D	ENSG00000126861	ENST00000247271	OMG	21	17.46	n198.1	rs11080149
17:29623288:C_T	17	29623288	C	T	SNV	INTRONIC	2	intron			ENSG00000196712	ENST00000358273	NF1		17.46	n198.1	rs11080149
17:29815404:G_T	17	29815404	T	G	SNV	INTRONIC	2	intron			ENSG00000131242	ENST00000325874	RAB11FIP4		15.3	n198.1	rs8075239
2:179432185:A_G	2	179432185	A	G	SNV	INTRONIC	2	intron,non_coding			ENSG00000237298	ENST00000419746	TTN-AS1		23	n22.1	rs12463674
2:179432185:A_G	2	179432185	A	G	SNV	NON_SYNONYMOUS	7	missense	I	T	ENSG00000155657	ENST00000589042	TTN	26225	23	n22.1	rs12463674
8:76476396:A_G	8	76476396	G	A	SNV	3PRIME_UTR	2	3_prime_UTR			ENSG00000164749	ENST00000396423	HNF4G		15.35	n23.1	rs1805100
19:36342212:C_T	19	36342212	C	T	SNV	NON_SYNONYMOUS	7	missense	E	K	ENSG00000161270	ENST00000378910	NPHS1	117	25	n24.1	rs3814995
17:1966457:C_T	17	1966457	C	T	SNV	INTRONIC	2	intron			ENSG00000070366	ENST00000263073	SMG6		18.3	n25.1	rs1048483
17:1978484:C_T	17	1978484	T	C	SNV	INTRONIC	2	intron			ENSG00000070366	ENST00000263073	SMG6		15.41	n25.1	rs9901671
17:1979188:C_T	17	1979188	T	C	SNV	INTRONIC	2	intron			ENSG00000070366	ENST00000263073	SMG6		16.6	n25.1	rs4790311
17:1994071:C_G	17	1994071	C	G	SNV	INTRONIC	2	intron			ENSG00000070366	ENST00000263073	SMG6		17.37	n25.1	rs3760230
13:74150398:A_G	13	74150398	A	G	SNV	INTRONIC	2	intron,non_coding			ENSG00000228295	ENST00000430033	LINC00392		15.56	n26.1	rs9543400
13:73565273:C_T	13	73565273	T	C	SNV	INTRONIC	2	intron			ENSG00000083535	ENST00000326291	PIBF1		20.5	n26.2	rs9543189
19:19379549:C_T	19	19379549	C	T	SNV	NON_SYNONYMOUS	7	missense	E	K	ENSG00000213996	ENST00000389363	TM6SF2	167	23.9	n29.1	rs58542926
18:46317137:A_G	18	46317137	G	A	SNV	INTRONIC	2	intron			ENSG00000134030	ENST00000382998	CTIF		21.6	n3.2	rs8094206
18:46324394:C_T	18	46324394	C	T	SNV	INTRONIC	2	intron			ENSG00000134030	ENST00000382998	CTIF		15.65	n3.2	rs12956065
8:66692011:C_T	8	66692011	C	T	SNV	NON_SYNONYMOUS	7	missense	G	E	ENSG00000205268	ENST00000401827	PDE7A	76	24	n30.1	rs11557049
11:9909127:A_G	11	9909127	G	A	SNV	INTRONIC	2	intron			ENSG00000133812	ENST00000256190	SBF2		16.07	n32.1	rs75248620
11:9909127:A_G	11	9909127	G	A	SNV	INTRONIC	2	intron			ENSG00000133812	ENST00000256190	SBF2		16.07	n32.2	rs75248620
11:10054645:A_T	11	10054645	T	A	SNV	INTRONIC	2	intron			ENSG00000133812	ENST00000256190	SBF2		15.44	n32.1	rs72858837
11:10054645:A_T	11	10054645	T	A	SNV	INTRONIC	2	intron			ENSG00000133812	ENST00000256190	SBF2		15.44	n32.2	rs72858837
11:10082065:C_T	11	10082065	T	C	SNV	INTRONIC	2	intron			ENSG00000133812	ENST00000256190	SBF2		15.64	n32.1	rs4350354
11:10082065:C_T	11	10082065	T	C	SNV	INTRONIC	2	intron			ENSG00000133812	ENST00000256190	SBF2		15.64	n32.2	rs4350354
11:10130646:G_T	11	10130646	T	G	SNV	INTRONIC	2	intron			ENSG00000133812	ENST00000256190	SBF2		15.92	n32.2	rs55865301
11:10130646:G_T	11	10130646	T	G	SNV	INTRONIC	2	intron			ENSG00000133812	ENST00000256190	SBF2		15.92	n32.1	rs55865301
11:10157111:A_G	11	10157111	A	G	SNV	INTRONIC	2	intron			ENSG00000133812	ENST00000256190	SBF2		15.76	n32.1	rs115078489
11:10157111:A_G	11	10157111	A	G	SNV	INTRONIC	2	intron			ENSG00000133812	ENST00000256190	SBF2		15.76	n32.2	rs115078489
11:10172545:A_G	11	10172545	A	G	SNV	INTRONIC	2	intron			ENSG00000133812	ENST00000256190	SBF2		19.85	n32.1	rs16907505
11:10172545:A_G	11	10172545	A	G	SNV	INTRONIC	2	intron			ENSG00000133812	ENST00000256190	SBF2		19.85	n32.2	rs16907505
11:10202931:A_G	11	10202931	A	G	SNV	INTRONIC	2	intron			ENSG00000133812	ENST00000256190	SBF2		17.09	n32.1	rs74845337
11:10202931:A_G	11	10202931	A	G	SNV	INTRONIC	2	intron			ENSG00000133812	ENST00000256190	SBF2		17.09	n32.2	rs74845337
11:10237871:A_T	11	10237871	A	T	SNV	INTRONIC	2	intron			ENSG00000133812	ENST00000256190	SBF2		15.31	n32.2	rs57522724
11:10237871:A_T	11	10237871	A	T	SNV	INTRONIC	2	intron			ENSG00000133812	ENST00000256190	SBF2		15.31	n32.1	rs57522724
11:9769562:C_G	11	9769562	C	G	SNV	NON_SYNONYMOUS	7	missense	Q	E	ENSG00000133789	ENST00000318950	SWAP70	505	18.31	n32.2	rs415895
11:9895925:C_G	11	9895925	C	G	SNV	INTRONIC	2	intron			ENSG00000133812	ENST00000256190	SBF2		15.82	n32.2	rs11601125
2:214012225:C_T	2	214012225	C	T	SNV	INTRONIC	2	intron			ENSG00000030419	ENST00000457361	IKZF2		18.75	n35.1	rs112905092
1:183009277:A_C	1	183009277	C	A	SNV	INTRONIC	2	intron			ENSG00000135862	ENST00000258341	LAMC1		18.93	n36.1	rs10911205
20:39797465:C_T	20	39797465	T	C	SNV	NON_SYNONYMOUS	7	missense	I	T	ENSG00000124181	ENST00000373272	PLCG1	813	22.8	n38.1	rs753381
2:219313354:C_T	2	219313354	T	C	SNV	INTRONIC	2	intron			ENSG00000127831	ENST00000248444	VIL1		15.22	n39.1	rs41461846
2:219342284:C_T	2	219342284	T	C	SNV	INTRONIC	2	intron			ENSG00000135913	ENST00000258399	USP37		18.89	n39.1	rs3845835
2:219508372:A_T	2	219508372	A	T	SNV	NON_SYNONYMOUS	7	missense	L	H	ENSG00000115568	ENST00000411696	ZNF142	956	15.1	n39.1	rs3770213
1:27079931:C_T	1	27079931	T	C	SNV	INTRONIC	2	intron			ENSG00000117713	ENST00000324856	ARID1A		17.17	n46.1	rs12742115
1:27108139:A_T	1	27108139	A	T	SNV	3PRIME_UTR	2	3_prime_UTR			ENSG00000117713	ENST00000324856	ARID1A		15.33	n46.1	rs60798877
1:27108245:C_T	1	27108245	T	C	SNV	3PRIME_UTR	2	3_prime_UTR			ENSG00000117713	ENST00000324856	ARID1A		15.6	n46.1	rs12685
1:27239920:C_G	1	27239920	C	G	SNV	NON_SYNONYMOUS	7	missense	G	A	ENSG00000131910	ENST00000254227	NR0B2	171	23.8	n46.1	rs6659176
1:27248440:C_T	1	27248440	C	T	SNV	INTRONIC	2	intron			ENSG00000090273	ENST00000321265	NUDC		15.48	n46.1	rs35108146
1:27278573:C_T	1	27278573	T	C	SNV	NON_SYNONYMOUS	7	missense	Q	R	ENSG00000175707	ENST00000320567	KDF1	100	21.2	n46.1	rs17360994
1:27740425:G_T	1	27740425	G	T	SNV	INTRONIC	2	intron			ENSG00000158195	ENST00000430629	WASF2		16.5	n46.2	rs2251670
1:27742308:A_G	1	27742308	G	A	SNV	INTRONIC	2	intron			ENSG00000158195	ENST00000430629	WASF2		16.98	n46.2	rs2474288
1:27744513:C_T	1	27744513	T	C	SNV	INTRONIC	2	intron			ENSG00000158195	ENST00000430629	WASF2		15.42	n46.2	rs1005413
1:27754076:C_T	1	27754076	C	T	SNV	INTRONIC	2	intron			ENSG00000158195	ENST00000430629	WASF2		15.6	n46.2	rs2504771
1:27755909:C_T	1	27755909	T	C	SNV	INTRONIC	2	intron			ENSG00000158195	ENST00000430629	WASF2		17.51	n46.2	rs2504772
1:27791871:C_T	1	27791871	C	T	SNV	INTRONIC	2	intron			ENSG00000158195	ENST00000430629	WASF2		16.76	n46.2	rs57019711
12:53995538:C_T	12	53995538	C	T	SNV	INTRONIC	2	intron			ENSG00000170653	ENST00000420353	ATF7		15.91	n47.1	rs7302357
3:196803647:C_T	3	196803647	T	C	SNV	INTRONIC	2	intron			ENSG00000075711	ENST00000346964	DLG1		19.9	n49.1	rs12632559
17:46233490:A_G	17	46233490	G	A	SNV	INTRONIC	2	intron			ENSG00000141293	ENST00000336915	SKAP1		15.2	n50.1	rs11079811
17:46238276:A_G	17	46238276	A	G	SNV	INTRONIC	2	intron			ENSG00000141293	ENST00000336915	SKAP1		22.4	n50.1	rs11079812
2:66657939:C_T	2	66657939	T	C	SNV	INTRONIC	2	intron,non_coding			ENSG00000226819	ENST00000454167	MEIS1-AS3		16.31	n52.1	rs756292
2:66668309:A_G	2	66668309	A	G	SNV	INTRONIC	2	intron			ENSG00000143995	ENST00000272369	MEIS1		16.71	n52.1	rs950965
2:66673862:A_C	2	66673862	A	C	SNV	INTRONIC	2	intron			ENSG00000143995	ENST00000272369	MEIS1		15.96	n52.1	rs11883967
2:101627925:C_T	2	101627925	C	T	SNV	NON_SYNONYMOUS	7	missense	G	R	ENSG00000204634	ENST00000376840	TBC1D8	954	22.4	n54.1	rs1062062
2:101627925:C_T	2	101627925	C	T	SNV	INTRONIC	2	intron			ENSG00000071082	ENST00000409028	RPL31		22.4	n54.1	rs1062062
2:101730093:G_T	2	101730093	T	G	SNV	INTRONIC	2	intron			ENSG00000204634	ENST00000376840	TBC1D8		19.85	n54.1	rs67087164
12:50267335:C_T	12	50267335	C	T	SNV	INTRONIC	2	intron			ENSG00000135472	ENST00000320634	FAIM2		15.39	n55.1	rs836968
12:50616346:A_G	12	50616346	A	G	SNV	INTRONIC	2	intron			ENSG00000050405	ENST00000394943	LIMA1		20.5	n55.1	rs3812825
12:50665946:G_T	12	50665946	G	T	SNV	INTRONIC	2	intron			ENSG00000050405	ENST00000394943	LIMA1		15.06	n55.1	rs11169348
12:50754563:G_T	12	50754563	T	G	SNV	NON_SYNONYMOUS	7	missense	K	Q	ENSG00000185958	ENST00000327337	FAM186A	187	21.3	n55.1	rs12303082
12:50940983:G_T	12	50940983	T	G	SNV	INTRONIC	2	intron			ENSG00000066084	ENST00000301180	DIP2B		15.46	n55.1	rs10876055
12:51203371:C_T	12	51203371	C	T	SNV	SPLICE_SITE	5	splice,synonymous	Y	Y	ENSG00000123268	ENST00000262053	ATF1	109	15.66	n55.1	rs1129406
2:26024445:C_T	2	26024445	T	C	SNV	INTRONIC	2	intron			ENSG00000143970	ENST00000435504	ASXL2		15.93	n6.1	rs72801812
3:153945495:A_G	3	153945495	G	A	SNV	INTRONIC	2	intron			ENSG00000114790	ENST00000356448	ARHGEF26		17.2	n60.1	rs357498
12:52305700:A_G	12	52305700	G	A	SNV	INTRONIC	2	intron			ENSG00000139567	ENST00000388922	ACVRL1		19.24	n62.1	rs12578436
12:82153090:C_T	12	82153090	C	T	SNV	5PRIME_UTR	3	5_prime_UTR			ENSG00000139220	ENST00000549396	PPFIA2		22.7	n64.1	rs11115002
16:28875122:G_T	16	28875122	T	G	SNV	INTRONIC	2	intron			ENSG00000178188	ENST00000322610	SH2B1		18.93	n65.1	rs7198606
16:28875204:A_T	16	28875204	A	T	SNV	INTRONIC	2	intron			ENSG00000178188	ENST00000322610	SH2B1		20.6	n65.1	rs11864750
16:28875482:A_G	16	28875482	A	G	SNV	INTRONIC	2	intron			ENSG00000178188	ENST00000322610	SH2B1		16.54	n65.1	rs7193733
16:28883241:A_G	16	28883241	A	G	SNV	NON_SYNONYMOUS	7	missense	T	A	ENSG00000178188	ENST00000322610	SH2B1	484	15.55	n65.1	rs7498665
11:408174:G_T	11	408174	G	T	SNV	NON_SYNONYMOUS	7	missense	S	Y	ENSG00000185187	ENST00000431843	SIGIRR	80	23.5	n69.1	rs117739035
11:419706:C_T	11	419706	T	C	SNV	NON_SYNONYMOUS	7	missense	T	A	ENSG00000185101	ENST00000332826	ANO9	604	17.66	n69.1	rs114405390
17:79612397:A_G	17	79612397	A	G	SNV	NON_SYNONYMOUS	7	missense	Y	C	ENSG00000182612	ENST00000328585	TSPAN10	139	16.14	n70.1	rs6420484
17:79634774:A_T	17	79634774	A	T	SNV	NON_SYNONYMOUS	7	missense	K	N	ENSG00000185298	ENST00000329214	CCDC137	50	24.1	n70.1	rs61742303
17:79638805:C_T	17	79638805	C	T	SNV	NON_SYNONYMOUS	7	missense	R	W	ENSG00000185298	ENST00000329214	CCDC137	177	22.9	n70.1	rs11150805
2:159923969:A_G	2	159923969	G	A	SNV	INTRONIC	2	intron			ENSG00000115183	ENST00000263635	TANC1		17.22	n74.1	rs264655
14:54417522:A_G	14	54417522	A	G	SNV	NON_SYNONYMOUS	7	missense	V	A	ENSG00000125378	ENST00000245451	BMP4	152	20	n76.1	rs17563
14:54420309:C_T	14	54420309	C	T	SNV	INTRONIC	2	intron			ENSG00000125378	ENST00000245451	BMP4		16.01	n76.1	rs2761882
10:131301577:A_G	10	131301577	G	A	SNV	INTRONIC	2	intron			ENSG00000170430	ENST00000306010	MGMT		20.3	n77.1	rs11016816
10:131446895:C_G	10	131446895	G	C	SNV	INTRONIC	2	intron			ENSG00000170430	ENST00000306010	MGMT		17.83	n77.1	rs7923750
11:55322638:C_T	11	55322638	C	T	SNV	NON_SYNONYMOUS	7	missense	R	C	ENSG00000181939	ENST00000314644	OR4C15	286	22.5	n78.1	rs12225462
11:55339652:C_T	11	55339652	C	T	SNV	STOP_GAINED	8	stop_gained	Q	*	ENSG00000181935	ENST00000314634	OR4C16	17	36	n78.1	rs1459101
11:55406022:C_G	11	55406022	C	G	SNV	STOP_GAINED	8	stop_gained	Y	*	ENSG00000181927	ENST00000314612	OR4P4	63	32	n78.1	rs76160133
11:55418693:C_T	11	55418693	T	C	SNV	NON_SYNONYMOUS	7	missense	F	S	ENSG00000174982	ENST00000312422	OR4S2	105	26	n78.1	rs11230541
11:55433040:C_T	11	55433040	T	C	SNV	NON_SYNONYMOUS	7	missense	I	T	ENSG00000181903	ENST00000314259	OR4C6	133	17.11	n78.1	rs11230600
11:55563336:A_T	11	55563336	A	T	SNV	NON_SYNONYMOUS	7	missense	Q	L	ENSG00000186113	ENST00000335605	OR5D14	102	22.5	n78.1	rs76383258
11:55587587:C_T	11	55587587	C	T	SNV	NON_SYNONYMOUS	7	missense	T	M	ENSG00000186119	ENST00000333976	OR5D18	161	20.3	n78.1	rs62001009
12:112217208:A_G	12	112217208	G	A	SNV	INTRONIC	2	intron			ENSG00000111275	ENST00000261733	ALDH2		15.16	n79.1	rs11609628
12:112431212:C_T	12	112431212	T	C	SNV	INTRONIC	2	intron			ENSG00000198270	ENST00000552374	TMEM116		15.4	n79.1	rs57646770
12:112464893:C_T	12	112464893	C	T	SNV	3PRIME_UTR	2	3_prime_UTR			ENSG00000111300	ENST00000261745	NAA25		17.05	n79.1	rs7295294
12:112598321:A_G	12	112598321	G	A	SNV	3PRIME_UTR	2	3_prime_UTR			ENSG00000173064	ENST00000550722	HECTD4		16.23	n79.1	rs3519
12:112699540:C_T	12	112699540	T	C	SNV	INTRONIC	2	intron			ENSG00000173064	ENST00000550722	HECTD4		18.23	n79.1	rs2285810
3:132218623:G_T	3	132218623	G	T	SNV	NON_SYNONYMOUS	7	missense	A	S	ENSG00000138246	ENST00000260818	DNAJC13	1463	19.44	n80.1	rs3762672
3:132218623:G_T	3	132218623	G	T	SNV	NON_SYNONYMOUS	7	missense	A	S	ENSG00000138246	ENST00000260818	DNAJC13	1463	19.44	n80.2	rs3762672
3:132235344:A_T	3	132235344	A	T	SNV	SPLICE_SITE	5	splice,intron			ENSG00000138246	ENST00000260818	DNAJC13		17.4	n80.1	rs80120242
3:132235344:A_T	3	132235344	A	T	SNV	SPLICE_SITE	5	splice,intron			ENSG00000138246	ENST00000260818	DNAJC13		17.4	n80.2	rs80120242
15:79054900:C_G	15	79054900	C	G	SNV	NON_SYNONYMOUS	7	missense	G	A	ENSG00000136378	ENST00000388820	ADAMTS7	1583	17.31	n81.1	rs7495616
6:2030894:C_T	6	2030894	T	C	SNV	INTRONIC	2	intron			ENSG00000112699	ENST00000380815	GMDS		16.7	n83.2	rs12214257
4:40428091:C_T	4	40428091	C	T	SNV	NON_SYNONYMOUS	7	missense	G	R	ENSG00000163694	ENST00000381793	RBM47	538	28.5	n86.2	rs35529250
11:128328913:A_G	11	128328913	G	A	SNV	3PRIME_UTR	2	3_prime_UTR			ENSG00000134954	ENST00000392668	ETS1		15.24	n88.1	rs8705
20:42815795:C_G	20	42815795	C	G	SNV	5PRIME_UTR	3	5_prime_UTR			ENSG00000149596	ENST00000372980	JPH2		17.41	n89.1	rs2235808
13:42749192:G_T	13	42749192	G	T	SNV	INTRONIC	2	intron			ENSG00000102780	ENST00000337343	DGKH		15.56	n9.1	rs9590675
1:115231254:A_G	1	115231254	G	A	SNV	NON_SYNONYMOUS	7	missense	P	L	ENSG00000116748	ENST00000520113	AMPD1	81	24.9	n90.1	rs61752479
1:115236057:A_G	1	115236057	G	A	SNV	STOP_GAINED	8	splice,stop_gained	Q	*	ENSG00000116748	ENST00000520113	AMPD1	45	36	n90.1	rs17602729
2:135433023:G_T	2	135433023	G	T	SNV	INTRONIC	2	intron			ENSG00000152128	ENST00000281924	TMEM163		15.84	n92.1	rs6430529
2:135622808:C_T	2	135622808	C	T	SNV	INTRONIC	2	intron			ENSG00000153086	ENST00000356140	ACMSD		15.61	n92.1	rs6430552
2:135622860:C_T	2	135622860	T	C	SNV	INTRONIC	2	intron			ENSG00000153086	ENST00000356140	ACMSD		17.4	n92.1	rs3819121
4:54257865:A_G	4	54257865	A	G	SNV	INTRONIC	2	intron			ENSG00000145216	ENST00000337488	FIP1L1		21.5	n96.1	rs62325162
4:54308604:A_G	4	54308604	G	A	SNV	INTRONIC	2	intron			ENSG00000145216	ENST00000337488	FIP1L1		20.6	n96.1	rs12506661
13:27757375:C_T	13	27757375	C	T	SNV	DOWNSTREAM	1	downstream			ENSG00000230641	ENST00000452222	USP12-DT		15.87	n97.1	rs7999846
15:45654327:A_G	15	45654327	A	G	SNV	SYNONYMOUS	5	synonymous	L	L	ENSG00000171766	ENST00000396659	GATM	418	12.2	k1.1	rs1145086
15:45654327:A_G	15	45654327	A	G	SNV	SYNONYMOUS	5	synonymous	L	L	ENSG00000171766	ENST00000396659	GATM	418	12.2	k1.3	rs1145086
15:45453032:C_T	15	45453032	T	C	SNV	SPLICE_SITE	5	splice,intron			ENSG00000137857	ENST00000321429	DUOX1		13.25	k1.3	rs3784584
15:45847921:C_T	15	45847921	T	C	SNV	NONCODING_CHANGE	5	non_coding_exon			ENSG00000179362	ENST00000396645	HMGN2P46		4.476	k1.3	rs8042811
6:160670282:A_C	6	160670282	A	C	SNV	NON_SYNONYMOUS	7	missense	S	A	ENSG00000112499	ENST00000366953	SLC22A2	270	8.7	k11.1	rs316019
6:160670282:A_C	6	160670282	A	C	SNV	NON_SYNONYMOUS	7	missense	S	A	ENSG00000112499	ENST00000366953	SLC22A2	270	8.7	k11.9	rs316019
6:160670282:A_C	6	160670282	A	C	SNV	NON_SYNONYMOUS	7	missense	S	A	ENSG00000112499	ENST00000366953	SLC22A2	270	8.7	k11.8	rs316019
6:160670282:A_C	6	160670282	A	C	SNV	NON_SYNONYMOUS	7	missense	S	A	ENSG00000112499	ENST00000366953	SLC22A2	270	8.7	k11.2	rs316019
6:160670282:A_C	6	160670282	A	C	SNV	NON_SYNONYMOUS	7	missense	S	A	ENSG00000112499	ENST00000366953	SLC22A2	270	8.7	k11.10	rs316019
6:160769811:C_T	6	160769811	C	T	SNV	SYNONYMOUS	5	synonymous	R	R	ENSG00000146477	ENST00000275300	SLC22A3	120	8.804	k11.9	rs668871
6:160769811:C_T	6	160769811	C	T	SNV	SYNONYMOUS	5	synonymous	R	R	ENSG00000146477	ENST00000275300	SLC22A3	120	8.804	k11.10	rs668871
3:49455330:C_T	3	49455330	C	T	SNV	SYNONYMOUS	5	synonymous	R	R	ENSG00000145020	ENST00000273588	AMT	318	12.87	k110.1	rs11715915
3:49570200:C_T	3	49570200	C	T	SNV	SYNONYMOUS	5	synonymous	H	H	ENSG00000173402	ENST00000545947	DAG1	752	6.833	k110.1	rs1801143
3:49689210:A_G	3	49689210	G	A	SNV	NON_SYNONYMOUS	7	missense	A	T	ENSG00000164061	ENST00000296452	BSN	741	9.498	k110.1	rs34762726
3:49690496:C_T	3	49690496	C	T	SNV	SYNONYMOUS	5	synonymous	S	S	ENSG00000164061	ENST00000296452	BSN	1169	0.085	k110.1	rs11709525
3:49701983:A_G	3	49701983	G	A	SNV	SYNONYMOUS	5	synonymous	T	T	ENSG00000164061	ENST00000296452	BSN	3912	4.394	k110.1	rs9858542
3:49714225:C_T	3	49714225	T	C	SNV	SYNONYMOUS	5	synonymous	Y	Y	ENSG00000164062	ENST00000296456	APEH	284	7.298	k110.1	rs1131095
3:49721798:A_C	3	49721798	C	A	SNV	SYNONYMOUS	5	synonymous	R	R	ENSG00000173531	ENST00000449682	MST1	655	8.455	k110.1	rs13085791
3:52727257:A_G	3	52727257	G	A	SNV	NON_SYNONYMOUS	7	missense	V	M	ENSG00000163938	ENST00000418458	GNL3	367	14.05	k110.2	rs2289247
3:52740182:C_G	3	52740182	C	G	SNV	NON_SYNONYMOUS	7	missense	P	A	ENSG00000114902	ENST00000233025	SPCS1	41	0.09	k110.2	rs6617
3:52802402:A_C	3	52802402	A	C	SNV	SYNONYMOUS	5	synonymous	P	P	ENSG00000114904	ENST00000233027	NEK4	104	6.487	k110.2	rs2230534
3:48419897:C_T	3	48419897	C	T	SNV	NON_SYNONYMOUS	7	missense	R	W	ENSG00000164049	ENST00000296438	FBXW12	166	0.247	k110.4	rs6442117
3:48422235:A_T	3	48422235	T	A	SNV	NON_SYNONYMOUS	7	missense	V	D	ENSG00000164049	ENST00000296438	FBXW12	273	0.11	k110.4	rs6784322
3:48461313:C_G	3	48461313	C	G	SNV	SYNONYMOUS	5	synonymous	P	P	ENSG00000164050	ENST00000358536	PLXNB1	794	6.813	k110.4	rs2362450
3:48463618:A_T	3	48463618	T	A	SNV	SPLICE_SITE	5	splice,intron			ENSG00000164050	ENST00000358536	PLXNB1		11.95	k110.4	rs9883759
3:48474249:A_G	3	48474249	A	G	SNV	SYNONYMOUS	5	synonymous	L	L	ENSG00000164051	ENST00000395694	CCDC51	269	8.8	k110.4	rs2279077
1:180905694:C_T	1	180905694	C	T	SNV	SYNONYMOUS	5	synonymous	N	N	ENSG00000135835	ENST00000367588	KIAA1614	883	1.24	k114.1	rs3795503
3:63846672:A_G	3	63846672	G	A	SNV	SPLICE_SITE	5	splice,non_coding_exon			ENSG00000240549	ENST00000468961	THOC7-AS1		10.54	k115.1	rs56329572
3:63997491:A_G	3	63997491	G	A	SNV	NONCODING_CHANGE	5	non_coding_exon			ENSG00000239653	ENST00000472046	PSMD6-AS2		3.63	k115.1	rs2280162
7:33060946:A_G	7	33060946	A	G	SNV	SYNONYMOUS	5	synonymous	Y	Y	ENSG00000122643	ENST00000242210	NT5C3A	131	8.359	k116.2	rs3750117
10:104573017:G_T	10	104573017	G	T	SNV	NON_SYNONYMOUS	7	missense	A	S	ENSG00000166272	ENST00000448841	WBP1L	341	13.36	k118.1	rs284859
3:136088038:A_G	3	136088038	G	A	SNV	SYNONYMOUS	5	synonymous	F	F	ENSG00000118007	ENST00000383202	STAG1	819	10.86	k120.1	rs9860801
2:224919:A_G	2	224919	A	G	SNV	SPLICE_SITE	5	splice,synonymous	S	S	ENSG00000035115	ENST00000356150	SH3YL1	261	14.02	k122.1	rs2290911
1:171483717:A_C	1	171483717	A	C	SNV	SYNONYMOUS	5	synonymous	A	A	ENSG00000117523	ENST00000338920	PRRC2C	109	13.12	k123.1	rs1055417
1:171509327:A_G	1	171509327	G	A	SNV	NON_SYNONYMOUS	7	missense	A	T	ENSG00000117523	ENST00000338920	PRRC2C	906	0.006	k123.1	rs760644
1:171511039:C_G	1	171511039	C	G	SNV	SYNONYMOUS	5	synonymous	S	S	ENSG00000117523	ENST00000338920	PRRC2C	1476	8.378	k123.1	rs1687064
1:171526570:A_G	1	171526570	G	A	SNV	SYNONYMOUS	5	synonymous	P	P	ENSG00000117523	ENST00000338920	PRRC2C	1771	2.804	k123.1	rs1687057
1:171556165:C_G	1	171556165	G	C	SNV	SYNONYMOUS	5	synonymous	S	S	ENSG00000117523	ENST00000338920	PRRC2C	2589	10.55	k123.1	rs235501
14:88935925:A_G	14	88935925	A	G	SNV	SYNONYMOUS	5	synonymous	T	T	ENSG00000070778	ENST00000556564	PTPN21	1051	1.531	k125.1	rs2297129
14:88945591:A_G	14	88945591	A	G	SNV	SYNONYMOUS	5	synonymous	P	P	ENSG00000070778	ENST00000556564	PTPN21	728	0.416	k125.1	rs879932
14:88946622:A_G	14	88946622	G	A	SNV	NON_SYNONYMOUS	7	missense	L	F	ENSG00000070778	ENST00000556564	PTPN21	385	8.867	k125.1	rs2401751
13:50655989:G_T	13	50655989	G	T	SNV	NONCODING_CHANGE	5	non_coding_exon			ENSG00000231607	ENST00000235290	DLEU2		14.55	k126.1	rs41284816
17:34854280:A_G	17	34854280	G	A	SNV	NON_SYNONYMOUS	7	missense	L	F	ENSG00000141140	ENST00000431794	MYO19	863	14.25	k127.1	rs2306590
22:30891250:C_T	22	30891250	T	C	SNV	SYNONYMOUS	5	synonymous	Q	Q	ENSG00000133488	ENST00000255858	SEC14L4	138	2.867	k129.2	rs9606738
22:30934887:A_G	22	30934887	G	A	SNV	SPLICE_SITE	5	splice,synonymous	F	F	ENSG00000214491	ENST00000402034	SEC14L6	19	7.061	k129.2	rs5753191
2:27730940:C_T	2	27730940	T	C	SNV	NON_SYNONYMOUS	7	splice,missense	L	P	ENSG00000084734	ENST00000264717	GCKR	446	12.52	k13.1	rs1260326
2:27802805:A_G	2	27802805	A	G	SNV	SYNONYMOUS	5	synonymous	L	L	ENSG00000221843	ENST00000408964	C2orf16	1122	9.876	k13.2	rs3811644
1:18807536:G_T	1	18807536	G	T	SNV	NON_SYNONYMOUS	7	missense	V	L	ENSG00000179023	ENST00000400664	KLHDC7A	21	14.78	k131.1	rs7512414
1:18807755:A_G	1	18807755	G	A	SNV	NON_SYNONYMOUS	7	missense	G	S	ENSG00000179023	ENST00000400664	KLHDC7A	94	13.02	k131.1	rs34976233
1:18807781:C_T	1	18807781	C	T	SNV	SYNONYMOUS	5	synonymous	G	G	ENSG00000179023	ENST00000400664	KLHDC7A	102	0.694	k131.1	rs35013594
1:18807953:A_C	1	18807953	C	A	SNV	NON_SYNONYMOUS	7	missense	R	S	ENSG00000179023	ENST00000400664	KLHDC7A	160	4.599	k131.1	rs11261022
1:18808056:C_G	1	18808056	G	C	SNV	NON_SYNONYMOUS	7	missense	R	P	ENSG00000179023	ENST00000400664	KLHDC7A	194	5.17	k131.1	rs7515150
1:18808069:A_G	1	18808069	A	G	SNV	SYNONYMOUS	5	synonymous	G	G	ENSG00000179023	ENST00000400664	KLHDC7A	198	3.724	k131.1	rs7528572
5:132437531:C_T	5	132437531	C	T	SNV	SYNONYMOUS	5	synonymous	I	I	ENSG00000170606	ENST00000304858	HSPA4	706	10.65	k139.1	rs1131809
5:131607721:C_T	5	131607721	C	T	SNV	SYNONYMOUS	5	synonymous	G	G	ENSG00000131435	ENST00000253754	PDLIM4	264	13.03	k139.3	rs10479001
5:131607721:C_T	5	131607721	C	T	SNV	SYNONYMOUS	5	synonymous	G	G	ENSG00000131435	ENST00000253754	PDLIM4	264	13.03	k139.2	rs10479001
5:131663062:C_T	5	131663062	T	C	SNV	NON_SYNONYMOUS	7	missense	I	T	ENSG00000197208	ENST00000200652	SLC22A4	306	13.67	k139.3	rs272893
5:131663062:C_T	5	131663062	T	C	SNV	NON_SYNONYMOUS	7	missense	I	T	ENSG00000197208	ENST00000200652	SLC22A4	306	13.67	k139.2	rs272893
5:131671662:C_G	5	131671662	C	G	SNV	SYNONYMOUS	5	synonymous	G	G	ENSG00000197208	ENST00000200652	SLC22A4	471	10.82	k139.3	rs12777
5:131671662:C_G	5	131671662	C	G	SNV	SYNONYMOUS	5	synonymous	G	G	ENSG00000197208	ENST00000200652	SLC22A4	471	10.82	k139.2	rs12777
5:131701279:C_T	5	131701279	T	C	SNV	NONCODING_CHANGE	5	non_coding_exon			ENSG00000263597	ENST00000584304	MIR3936		2.334	k139.3	rs367805
5:131701279:C_T	5	131701279	T	C	SNV	NONCODING_CHANGE	5	non_coding_exon			ENSG00000263597	ENST00000584304	MIR3936		2.334	k139.2	rs367805
5:131805735:C_T	5	131805735	C	T	SNV	NON_SYNONYMOUS	7	missense	P	L	ENSG00000197536	ENST00000407797	IRF1-AS1	31	4.98	k139.3	rs2706379
5:131805735:C_T	5	131805735	C	T	SNV	NON_SYNONYMOUS	7	missense	P	L	ENSG00000197536	ENST00000407797	IRF1-AS1	31	4.98	k139.2	rs2706379
14:93401178:A_G	14	93401178	A	G	SNV	SYNONYMOUS	5	synonymous	E	E	ENSG00000100604	ENST00000216492	CHGA	441	9.769	k141.2	rs941581
19:49621964:C_T	19	49621964	T	C	SNV	NON_SYNONYMOUS	7	missense	S	G	ENSG00000221916	ENST00000408991	C19orf73	106	8.012	k143.2	rs2232003
10:50960209:A_G	10	50960209	G	A	SNV	SYNONYMOUS	5	synonymous	L	L	ENSG00000197444	ENST00000374103	OGDHL	188	7.354	k144.1	rs1258184
9:139100805:C_T	9	139100805	T	C	SNV	SYNONYMOUS	5	synonymous	P	P	ENSG00000165661	ENST00000358701	QSOX2	622	0.332	k145.1	rs9696116
9:139110654:C_T	9	139110654	C	T	SNV	SPLICE_SITE	5	splice,synonymous	K	K	ENSG00000165661	ENST00000358701	QSOX2	319	9.675	k145.1	rs12684650
1:78585086:C_T	1	78585086	T	C	SNV	NON_SYNONYMOUS	7	missense	L	P	ENSG00000137960	ENST00000370759	GIPC2	206	9.772	k146.1	rs540742
21:37833307:C_T	21	37833307	C	T	SNV	SYNONYMOUS	5	synonymous	T	T	ENSG00000159261	ENST00000399137	CLDN14	229	0.036	k147.1	rs219780
21:37833751:A_G	21	37833751	G	A	SNV	SYNONYMOUS	5	synonymous	R	R	ENSG00000159261	ENST00000399137	CLDN14	81	2.185	k147.1	rs219779
7:129479138:C_T	7	129479138	T	C	SNV	SYNONYMOUS	5	synonymous	L	L	ENSG00000186591	ENST00000355621	UBE2H	112	13.02	k149.1	rs12539800
3:125855599:G_T	3	125855599	G	T	SNV	SPLICE_SITE	5	splice,intron			ENSG00000144908	ENST00000273450	ALDH1L1		3.151	k151.2	rs2305229
3:125856695:A_C	3	125856695	C	A	SNV	SYNONYMOUS	5	synonymous	L	L	ENSG00000144908	ENST00000273450	ALDH1L1	405	0.213	k151.2	rs2305230
3:125865766:A_C	3	125865766	C	A	SNV	NON_SYNONYMOUS	7	missense	V	F	ENSG00000144908	ENST00000273450	ALDH1L1	340	12.61	k151.2	rs2886059
20:60895697:C_T	20	60895697	C	T	SNV	NON_SYNONYMOUS	7	missense	R	H	ENSG00000130702	ENST00000252999	LAMA5	2226	8.207	k153.1	rs2297587
20:60897772:C_T	20	60897772	T	C	SNV	NON_SYNONYMOUS	7	missense	H	R	ENSG00000130702	ENST00000252999	LAMA5	2036	0.233	k153.1	rs6143021
20:60898505:C_T	20	60898505	C	T	SNV	SPLICE_SITE	5	splice,intron			ENSG00000130702	ENST00000252999	LAMA5		0.013	k153.1	rs2379128
20:60899206:C_T	20	60899206	C	T	SNV	NON_SYNONYMOUS	7	missense	V	M	ENSG00000130702	ENST00000252999	LAMA5	1900	10.07	k153.1	rs2427283
20:60913127:A_G	20	60913127	A	G	SNV	SYNONYMOUS	5	synonymous	A	A	ENSG00000130702	ENST00000252999	LAMA5	612	0.387	k153.1	rs8124907
20:60920887:A_G	20	60920887	G	A	SNV	SYNONYMOUS	5	synonymous	A	A	ENSG00000130702	ENST00000252999	LAMA5	488	8.855	k153.1	rs11204472
20:60927412:A_G	20	60927412	G	A	SNV	SYNONYMOUS	5	synonymous	S	S	ENSG00000130702	ENST00000252999	LAMA5	191	8.332	k153.1	rs624313
2:152387553:C_T	2	152387553	T	C	SNV	SYNONYMOUS	5	synonymous	T	T	ENSG00000183091	ENST00000397345	NEB	7195	0.921	k156.1	rs4664475
2:152226570:A_G	2	152226570	A	G	SNV	NON_SYNONYMOUS	7	missense	Q	R	ENSG00000123610	ENST00000243347	TNFAIP6	144	12.88	k156.2	rs1046668
14:100759277:C_T	14	100759277	C	T	SNV	SYNONYMOUS	5	synonymous	R	R	ENSG00000197119	ENST00000359232	SLC25A29	85	8.633	k157.1	rs3742379
11:77920563:G_T	11	77920563	G	T	SNV	SYNONYMOUS	5	synonymous	P	P	ENSG00000118369	ENST00000529308	USP35	554	0.072	k159.1	rs2510045
11:77930345:C_T	11	77930345	T	C	SNV	SYNONYMOUS	5	synonymous	S	S	ENSG00000033327	ENST00000361507	GAB2	668	4.599	k159.1	rs2450122
11:77936166:A_G	11	77936166	A	G	SNV	SYNONYMOUS	5	synonymous	V	V	ENSG00000033327	ENST00000361507	GAB2	430	6.118	k159.1	rs1385600
11:77937800:A_G	11	77937800	G	A	SNV	SYNONYMOUS	5	synonymous	F	F	ENSG00000033327	ENST00000361507	GAB2	306	5.112	k159.1	rs2248407
6:52617731:C_G	6	52617731	C	G	SNV	NON_SYNONYMOUS	7	missense	S	T	ENSG00000244067	ENST00000493422	GSTA2	112	0.005	k161.1	rs2180314
6:52658962:C_T	6	52658962	T	C	SNV	SYNONYMOUS	5	synonymous	K	K	ENSG00000243955	ENST00000334575	GSTA1	125	0.831	k161.1	rs1051775
2:188211112:C_T	2	188211112	C	T	SNV	SYNONYMOUS	5	synonymous	L	L	ENSG00000064989	ENST00000409998	CALCRL	395	11.04	k164.1	rs3771095
7:65425894:A_G	7	65425894	A	G	SNV	NON_SYNONYMOUS	7	missense	L	P	ENSG00000169919	ENST00000304895	GUSB	649	9.644	k167.1	rs9530
7:65841981:A_G	7	65841981	A	G	SNV	NONCODING_CHANGE	5	non_coding_exon			ENSG00000179406	ENST00000421767	LINC00174		5.694	k167.1	rs6974355
19:33183352:C_G	19	33183352	G	C	SNV	SYNONYMOUS	5	synonymous	P	P	ENSG00000213965	ENST00000397061	NUDT19	162	1.309	k17.2	rs61732600
19:33349351:C_T	19	33349351	C	T	SNV	SYNONYMOUS	5	synonymous	A	A	ENSG00000021488	ENST00000023064	SLC7A9	324	6.667	k17.2	rs61730903
19:33353041:A_G	19	33353041	G	A	SNV	SYNONYMOUS	5	synonymous	L	L	ENSG00000021488	ENST00000023064	SLC7A9	229	10.72	k17.2	rs1007161
19:33353464:A_G	19	33353464	G	A	SNV	SYNONYMOUS	5	synonymous	S	S	ENSG00000021488	ENST00000023064	SLC7A9	169	7.472	k17.2	rs11084673
19:33355055:A_G	19	33355055	A	G	SNV	NON_SYNONYMOUS	7	missense	V	A	ENSG00000021488	ENST00000023064	SLC7A9	142	2.355	k17.2	rs12150889
19:33355069:A_G	19	33355069	A	G	SNV	SYNONYMOUS	5	synonymous	C	C	ENSG00000021488	ENST00000023064	SLC7A9	137	0.425	k17.2	rs12150890
19:33390796:A_G	19	33390796	G	A	SNV	SYNONYMOUS	5	synonymous	N	N	ENSG00000121289	ENST00000305768	CEP89	614	0.239	k17.2	rs10418340
19:33467515:C_T	19	33467515	T	C	SNV	NON_SYNONYMOUS	7	missense	I	T	ENSG00000131944	ENST00000588258	FAAP24	192	7.813	k17.2	rs3816032
2:233633460:A_G	2	233633460	G	A	SNV	NON_SYNONYMOUS	7	missense	T	I	ENSG00000115474	ENST00000233826	KCNJ13	175	6.521	k171.1	rs1801251
2:233708806:A_G	2	233708806	A	G	SNV	SYNONYMOUS	5	synonymous	Q	Q	ENSG00000204120	ENST00000409451	GIGYF2	1001	8.853	k171.1	rs3816334
22:36556823:G_T	22	36556823	G	T	SNV	NON_SYNONYMOUS	7	missense	S	R	ENSG00000128284	ENST00000349314	APOL3	39	1.323	k172.1	rs132653
1:55538462:C_T	1	55538462	C	T	SNV	SYNONYMOUS	5	synonymous	K	K	ENSG00000162402	ENST00000294383	USP24	2533	11.04	k173.1	rs17410294
11:57463500:C_T	11	57463500	T	C	SNV	SYNONYMOUS	5	synonymous	L	L	ENSG00000156599	ENST00000287169	ZDHHC5	332	10.88	k176.1	rs1783978
11:57563991:C_T	11	57563991	C	T	SNV	SYNONYMOUS	5	synonymous	D	D	ENSG00000198561	ENST00000399050	CTNND1	161	9.353	k176.1	rs10896644
14:50735947:C_T	14	50735947	T	C	SNV	SYNONYMOUS	5	synonymous	P	P	ENSG00000087299	ENST00000267436	L2HGDH	280	10.69	k179.1	rs72683923
9:71152343:C_G	9	71152343	C	G	SNV	NON_SYNONYMOUS	7	missense	E	D	ENSG00000181778	ENST00000377311	TMEM252	115	8.699	k18.2	rs117451470
9:71152343:C_G	9	71152343	C	G	SNV	NON_SYNONYMOUS	7	missense	E	D	ENSG00000181778	ENST00000377311	TMEM252	115	8.699	k18.3	rs117451470
4:3162056:C_T	4	3162056	C	T	SNV	SYNONYMOUS	5	synonymous	L	L	ENSG00000197386	ENST00000355072	HTT	1267	0.562	k188.1	rs363099
4:3213832:A_G	4	3213832	G	A	SNV	SYNONYMOUS	5	synonymous	E	E	ENSG00000197386	ENST00000355072	HTT	2197	0.229	k188.1	rs362336
4:3227419:A_G	4	3227419	A	G	SNV	SYNONYMOUS	5	synonymous	L	L	ENSG00000197386	ENST00000355072	HTT	2599	10.41	k188.1	rs362273
17:37627387:A_G	17	37627387	A	G	SNV	SYNONYMOUS	5	synonymous	S	S	ENSG00000167258	ENST00000447079	CDK12	434	10.71	k19.1	rs56158954
17:37627387:A_G	17	37627387	A	G	SNV	SYNONYMOUS	5	synonymous	S	S	ENSG00000167258	ENST00000447079	CDK12	434	10.71	k19.5	rs56158954
17:37070658:A_G	17	37070658	A	G	SNV	SYNONYMOUS	5	synonymous	S	S	ENSG00000002834	ENST00000318008	LASP1	146	5.908	k19.3	rs525989
17:38024626:C_T	17	38024626	C	T	SNV	SYNONYMOUS	5	synonymous	L	L	ENSG00000186075	ENST00000348931	ZPBP2	7	7.745	k19.5	rs11557466
17:38031674:C_T	17	38031674	C	T	SNV	SYNONYMOUS	5	synonymous	C	C	ENSG00000186075	ENST00000348931	ZPBP2	292	2.305	k19.5	rs10852935
17:38122686:A_G	17	38122686	G	A	SNV	NON_SYNONYMOUS	7	missense	E	K	ENSG00000167914	ENST00000301659	GSDMA	130	14.79	k19.5	rs7212944
17:38285693:A_C	17	38285693	C	A	SNV	SYNONYMOUS	5	synonymous	T	T	ENSG00000188895	ENST00000579565	MSL1	133	12	k19.5	rs143879261
17:38545824:A_C	17	38545824	C	A	SNV	NON_SYNONYMOUS	7	missense	A	S	ENSG00000131747	ENST00000423485	TOP2A	1515	12.71	k19.5	rs11540720
17:38548586:G_T	17	38548586	T	G	SNV	SYNONYMOUS	5	synonymous	T	T	ENSG00000131747	ENST00000423485	TOP2A	1324	8.962	k19.5	rs34270904
1:155178782:A_T	1	155178782	A	T	SNV	NON_SYNONYMOUS	7	missense	T	S	ENSG00000173171	ENST00000368376	MTX1	63	0.418	k191.1	rs760077
1:155178782:A_T	1	155178782	A	T	SNV	NON_SYNONYMOUS	7	missense	T	S	ENSG00000173171	ENST00000368376	MTX1	63	0.418	k191.2	rs760077
1:155184975:A_G	1	155184975	A	G	SNV	NONCODING_CHANGE	5	non_coding_exon			ENSG00000160766	ENST00000473223	GBAP1		2.742	k191.2	rs2990223
1:155184975:A_G	1	155184975	A	G	SNV	NONCODING_CHANGE	5	non_coding_exon			ENSG00000160766	ENST00000473223	GBAP1		2.742	k191.1	rs2990223
9:140079522:A_G	9	140079522	G	A	SNV	SYNONYMOUS	5	synonymous	V	V	ENSG00000176248	ENST00000323927	ANAPC2	297	7.912	k194.1	9:140079522_G_A
9:140094605:A_C	9	140094605	C	A	SNV	NON_SYNONYMOUS	7	missense	A	S	ENSG00000176058	ENST00000409012	TPRN	187	0.668	k194.1	9:140094605_C_A
16:20359633:C_T	16	20359633	C	T	SNV	SYNONYMOUS	5	synonymous	G	G	ENSG00000169344	ENST00000570689	UMOD	295	8.036	k2.2	rs28544423
16:20359831:C_T	16	20359831	C	T	SNV	SYNONYMOUS	5	synonymous	V	V	ENSG00000169344	ENST00000570689	UMOD	264	12.99	k2.2	rs13335818
6:101094554:A_G	6	101094554	A	G	SNV	SYNONYMOUS	5	synonymous	P	P	ENSG00000112249	ENST00000369162	ASCC3	1190	10.86	k200.1	rs239239
1:228362682:A_G	1	228362682	G	A	SNV	NON_SYNONYMOUS	7	missense	G	S	ENSG00000181873	ENST00000366711	IBA57	211	6.05	k204.1	rs2298014
1:228402047:A_G	1	228402047	A	G	SNV	SYNONYMOUS	5	synonymous	L	L	ENSG00000154358	ENST00000570156	OBSCN	477	9.977	k204.1	rs1620111
1:228402508:C_T	1	228402508	C	T	SNV	SYNONYMOUS	5	synonymous	L	L	ENSG00000154358	ENST00000570156	OBSCN	513	3.523	k204.1	rs2776853
1:228407260:A_G	1	228407260	G	A	SNV	SYNONYMOUS	5	synonymous	E	E	ENSG00000154358	ENST00000570156	OBSCN	963	5.801	k204.1	rs1771484
1:228471379:C_G	1	228471379	G	C	SNV	SYNONYMOUS	5	synonymous	R	R	ENSG00000154358	ENST00000570156	OBSCN	3400	0.942	k204.1	rs56168609
1:228524961:A_C	1	228524961	C	A	SNV	SYNONYMOUS	5	synonymous	P	P	ENSG00000154358	ENST00000570156	OBSCN	6516	0.071	k204.1	rs3795808
1:228559994:C_T	1	228559994	C	T	SNV	NON_SYNONYMOUS	7	missense	A	V	ENSG00000154358	ENST00000570156	OBSCN	8129	13.86	k204.1	rs500049
10:75871735:C_G	10	75871735	C	G	SNV	SYNONYMOUS	5	synonymous	G	G	ENSG00000035403	ENST00000211998	VCL	938	11.64	k205.1	rs2131956
10:74896664:C_T	10	74896664	T	C	SNV	NON_SYNONYMOUS	7	missense	N	S	ENSG00000122882	ENST00000430082	ECD	534	9.139	k205.2	rs36152134
10:75000698:C_T	10	75000698	T	C	SNV	SPLICE_SITE	5	splice,intron			ENSG00000138286	ENST00000242505	FAM149B1		11.88	k205.2	rs11000561
10:75036294:C_G	10	75036294	C	G	SNV	NONCODING_CHANGE	5	non_coding_exon			ENSG00000236756	ENST00000440197	DNAJC9-AS1		7.331	k205.2	rs4471347
10:75036478:C_T	10	75036478	T	C	SNV	NONCODING_CHANGE	5	non_coding_exon			ENSG00000236756	ENST00000440197	DNAJC9-AS1		6.102	k205.2	rs7922397
10:75036686:C_T	10	75036686	C	T	SNV	NONCODING_CHANGE	5	non_coding_exon			ENSG00000236756	ENST00000440197	DNAJC9-AS1		1.143	k205.2	rs3812620
10:75056863:A_C	10	75056863	A	C	SNV	SYNONYMOUS	5	synonymous	L	L	ENSG00000156042	ENST00000310715	CFAP70	597	10.88	k205.2	rs6480692
10:75095253:A_G	10	75095253	G	A	SNV	SYNONYMOUS	5	synonymous	C	C	ENSG00000156042	ENST00000310715	CFAP70	274	10.64	k205.2	rs7910541
10:75148116:A_G	10	75148116	A	G	SNV	SYNONYMOUS	5	synonymous	D	D	ENSG00000138279	ENST00000372919	ANXA7	186	11.87	k205.2	rs2234965
10:75558867:A_G	10	75558867	G	A	SNV	SYNONYMOUS	5	synonymous	L	L	ENSG00000214655	ENST00000398706	ZSWIM8	1428	7.97	k205.2	rs2271271
10:75673101:C_T	10	75673101	T	C	SNV	NON_SYNONYMOUS	7	missense	L	P	ENSG00000122861	ENST00000372764	PLAU	141	11.74	k205.2	rs2227564
4:52752812:A_T	4	52752812	A	T	SNV	SPLICE_SITE	5	splice,intron			ENSG00000109184	ENST00000334635	DCUN1D4		8.044	k206.1	rs2271046
1:207890892:A_G	1	207890892	G	A	SNV	NON_SYNONYMOUS	7	missense	V	I	ENSG00000197721	ENST00000508064	CR1L	500	0.108	k209.1	rs116455739
11:119005132:C_T	11	119005132	C	T	SNV	NON_SYNONYMOUS	7	missense	A	V	ENSG00000172273	ENST00000350777	HINFP	493	4.577	k210.1	rs100803
11:119005132:C_T	11	119005132	C	T	SNV	NON_SYNONYMOUS	7	missense	A	V	ENSG00000172273	ENST00000350777	HINFP	493	4.577	k210.2	rs100803
10:88939962:C_T	10	88939962	T	C	SNV	SYNONYMOUS	5	synonymous	G	G	ENSG00000122376	ENST00000298784	SHLD2	698	8.126	k212.1	rs7081609
1:10659338:C_G	1	10659338	C	G	SNV	SYNONYMOUS	5	synonymous	G	G	ENSG00000142655	ENST00000356607	PEX14	71	11.85	k216.1	rs41274482
16:16162019:C_T	16	16162019	T	C	SNV	SYNONYMOUS	5	synonymous	L	L	ENSG00000103222	ENST00000399410	ABCC1	562	4.865	k217.1	rs35605
16:16244584:C_T	16	16244584	C	T	SNV	SYNONYMOUS	5	synonymous	R	R	ENSG00000091262	ENST00000205557	ABCC6	1418	12.44	k217.1	rs58668703
16:2025678:A_C	16	2025678	C	A	SNV	SYNONYMOUS	5	synonymous	L	L	ENSG00000183751	ENST00000568546	TBL3	318	2.465	k218.2	rs17602
16:2161793:A_G	16	2161793	G	A	SNV	SYNONYMOUS	5	synonymous	S	S	ENSG00000008710	ENST00000262304	PKD1	1125	0.158	k218.2	rs74331768
16:2161796:A_G	16	2161796	G	A	SNV	SYNONYMOUS	5	synonymous	A	A	ENSG00000008710	ENST00000262304	PKD1	1124	0.013	k218.2	rs75510884
16:2162887:A_G	16	2162887	A	G	SNV	SYNONYMOUS	5	synonymous	G	G	ENSG00000008710	ENST00000262304	PKD1	1021	7.472	k218.2	rs2369068
3:14190237:G_T	3	14190237	T	G	SNV	SPLICE_SITE	5	splice,intron			ENSG00000154767	ENST00000285021	XPC		7.014	k219.1	rs2279017
17:56620167:C_T	17	56620167	C	T	SNV	NON_SYNONYMOUS	7	missense	G	S	ENSG00000181013	ENST00000321691	C17orf47	461	0.082	k220.1	rs17822735
17:56620501:A_G	17	56620501	A	G	SNV	SYNONYMOUS	5	synonymous	H	H	ENSG00000181013	ENST00000321691	C17orf47	349	0.595	k220.1	rs17222523
17:56643109:A_G	17	56643109	A	G	SNV	SPLICE_SITE	5	splice,synonymous	N	N	ENSG00000121101	ENST00000240361	TEX14	1367	1.301	k220.1	rs34818467
17:57290383:A_G	17	57290383	G	A	SNV	SYNONYMOUS	5	synonymous	R	R	ENSG00000167447	ENST00000543872	SMG8	733	11.57	k220.1	rs3744383
20:14535045:G_T	20	14535045	G	T	SNV	NONCODING_CHANGE	5	non_coding_exon			ENSG00000227927	ENST00000448536	MACROD2-IT1		10.45	k222.1	rs2224291
1:220154768:C_T	1	220154768	C	T	SNV	SYNONYMOUS	5	synonymous	Q	Q	ENSG00000136628	ENST00000366923	EPRS1	1135	11.55	k223.1	rs1061160
1:220197625:G_T	1	220197625	G	T	SNV	NON_SYNONYMOUS	7	missense	D	E	ENSG00000136628	ENST00000366923	EPRS1	308	8.745	k223.1	rs2230301
1:220269439:A_T	1	220269439	A	T	SNV	SPLICE_SITE	5	splice,intron			ENSG00000067704	ENST00000302637	IARS2		8.912	k223.1	rs78836180
1:220330672:C_T	1	220330672	C	T	SNV	SYNONYMOUS	5	synonymous	L	L	ENSG00000118873	ENST00000358951	RAB3GAP2	1165	6.695	k223.1	rs11547779
15:53994493:A_G	15	53994493	A	G	SNV	SYNONYMOUS	5	synonymous	Y	Y	ENSG00000166415	ENST00000396328	WDR72	469	1.067	k25.1	rs6416452
15:53994493:A_G	15	53994493	A	G	SNV	SYNONYMOUS	5	synonymous	Y	Y	ENSG00000166415	ENST00000396328	WDR72	469	1.067	k25.2	rs6416452
22:40417780:C_T	22	40417780	C	T	SNV	SYNONYMOUS	5	synonymous	N	N	ENSG00000133477	ENST00000333407	FAM83F	422	0.202	k33.3	rs5995793
22:40673999:C_T	22	40673999	C	T	SNV	SPLICE_SITE	5	splice,intron			ENSG00000100354	ENST00000454349	TNRC6B		9.591	k33.3	rs2413621
22:40814636:C_T	22	40814636	C	T	SNV	SYNONYMOUS	5	synonymous	A	A	ENSG00000196588	ENST00000355630	MRTFA	602	0.005	k33.3	rs4821944
5:68715310:C_T	5	68715310	C	T	SNV	NON_SYNONYMOUS	7	missense	T	I	ENSG00000152939	ENST00000325631	MARVELD2	33	6.264	k35.3	rs1185246
19:38056763:C_G	19	38056763	C	G	SNV	NON_SYNONYMOUS	7	missense	Q	H	ENSG00000180479	ENST00000328550	ZNF571	189	0.041	k36.1	rs8111790
19:38076907:C_T	19	38076907	T	C	SNV	NONCODING_CHANGE	5	non_coding_exon			ENSG00000267470	ENST00000585578	ZNF571-AS1		9.014	k36.1	rs73033122
2:177034121:G_T	2	177034121	G	T	SNV	SYNONYMOUS	5	synonymous	P	P	ENSG00000128652	ENST00000468418	HOXD3	93	11.22	k37.4	rs34729309
2:177034121:G_T	2	177034121	G	T	SNV	SYNONYMOUS	5	synonymous	P	P	ENSG00000128652	ENST00000468418	HOXD3	93	11.22	k37.6	rs34729309
2:177034121:G_T	2	177034121	G	T	SNV	SYNONYMOUS	5	synonymous	P	P	ENSG00000128652	ENST00000468418	HOXD3	93	11.22	k37.5	rs34729309
2:177040084:A_G	2	177040084	G	A	SNV	NONCODING_CHANGE	5	non_coding_exon			ENSG00000224189	ENST00000416928	HAGLR		4.783	k37.6	rs1124052
2:177040084:A_G	2	177040084	G	A	SNV	NONCODING_CHANGE	5	non_coding_exon			ENSG00000224189	ENST00000416928	HAGLR		4.783	k37.4	rs1124052
2:177040084:A_G	2	177040084	G	A	SNV	NONCODING_CHANGE	5	non_coding_exon			ENSG00000224189	ENST00000416928	HAGLR		4.783	k37.5	rs1124052
2:177054769:A_G	2	177054769	G	A	SNV	NON_SYNONYMOUS	7	missense	A	T	ENSG00000128645	ENST00000331462	HOXD1	296	14.43	k37.4	rs6710142
2:177054769:A_G	2	177054769	G	A	SNV	NON_SYNONYMOUS	7	missense	A	T	ENSG00000128645	ENST00000331462	HOXD1	296	14.43	k37.6	rs6710142
2:177054769:A_G	2	177054769	G	A	SNV	NON_SYNONYMOUS	7	missense	A	T	ENSG00000128645	ENST00000331462	HOXD1	296	14.43	k37.5	rs6710142
15:41476465:A_G	15	41476465	G	A	SNV	SYNONYMOUS	5	synonymous	T	T	ENSG00000178997	ENST00000314992	EXD1	403	2.518	k39.1	rs690733
15:41509288:A_T	15	41509288	T	A	SNV	SPLICE_SITE	5	splice,intron			ENSG00000178997	ENST00000314992	EXD1		4.888	k39.1	rs7173086
12:3387697:C_T	12	3387697	T	C	SNV	SYNONYMOUS	5	synonymous	I	I	ENSG00000011105	ENST00000011898	TSPAN9	58	10.21	k43.1	rs16930370
12:3387697:C_T	12	3387697	T	C	SNV	SYNONYMOUS	5	synonymous	I	I	ENSG00000011105	ENST00000011898	TSPAN9	58	10.21	k43.4	rs16930370
16:89348018:C_T	16	89348018	C	T	SNV	SYNONYMOUS	5	synonymous	G	G	ENSG00000167522	ENST00000301030	ANKRD11	1644	0.019	k44.2	rs72821356
16:89349128:A_G	16	89349128	G	A	SNV	SYNONYMOUS	5	synonymous	A	A	ENSG00000167522	ENST00000301030	ANKRD11	1274	0.064	k44.2	rs61741725
16:51172677:A_G	16	51172677	G	A	SNV	SYNONYMOUS	5	synonymous	H	H	ENSG00000103449	ENST00000251020	SALL1	1152	8.326	k46.3	rs11645288
16:51173559:A_G	16	51173559	G	A	SNV	SYNONYMOUS	5	synonymous	L	L	ENSG00000103449	ENST00000251020	SALL1	858	0.054	k46.3	rs1965024
3:38493153:A_G	3	38493153	G	A	SNV	NONCODING_CHANGE	5	non_coding_exon			ENSG00000229589	ENST00000441531	ACVR2B-AS1		5.278	k47.1	rs2366123
3:38493212:C_T	3	38493212	T	C	SNV	NONCODING_CHANGE	5	non_coding_exon			ENSG00000229589	ENST00000441531	ACVR2B-AS1		4.083	k47.1	rs3792527
3:38493852:A_C	3	38493852	C	A	SNV	NONCODING_CHANGE	5	non_coding_exon			ENSG00000229589	ENST00000441531	ACVR2B-AS1		2.132	k47.1	rs3762788
3:38494220:C_T	3	38494220	T	C	SNV	NONCODING_CHANGE	5	non_coding_exon			ENSG00000229589	ENST00000441531	ACVR2B-AS1		0.215	k47.1	rs1870914
3:38519424:A_G	3	38519424	A	G	SNV	SYNONYMOUS	5	synonymous	E	E	ENSG00000114739	ENST00000352511	ACVR2B	111	11.98	k47.1	rs2070489
3:38524742:C_T	3	38524742	C	T	SNV	SYNONYMOUS	5	synonymous	N	N	ENSG00000114739	ENST00000352511	ACVR2B	486	10.37	k47.1	rs1046048
10:69933921:A_G	10	69933921	G	A	SNV	NON_SYNONYMOUS	7	missense	S	N	ENSG00000138347	ENST00000358913	MYPN	691	12.64	k49.1	rs10997975
10:69933921:A_G	10	69933921	G	A	SNV	NON_SYNONYMOUS	7	missense	S	N	ENSG00000138347	ENST00000358913	MYPN	691	12.64	k49.2	rs10997975
10:70405237:A_G	10	70405237	G	A	SNV	SYNONYMOUS	5	synonymous	E	E	ENSG00000138336	ENST00000373644	TET1	917	7.287	k49.2	rs12241767
11:2647793:C_T	11	2647793	C	T	SNV	NONCODING_CHANGE	5	non_coding_exon			ENSG00000269821	ENST00000597346	KCNQ1OT1		2.885	k50.1	rs2412056
11:2647793:C_T	11	2647793	C	T	SNV	NONCODING_CHANGE	5	non_coding_exon			ENSG00000269821	ENST00000597346	KCNQ1OT1		2.885	k50.3	rs2412056
11:2648291:G_T	11	2648291	G	T	SNV	NONCODING_CHANGE	5	non_coding_exon			ENSG00000269821	ENST00000597346	KCNQ1OT1		6.283	k50.3	rs10741670
11:2648291:G_T	11	2648291	G	T	SNV	NONCODING_CHANGE	5	non_coding_exon			ENSG00000269821	ENST00000597346	KCNQ1OT1		6.283	k50.1	rs10741670
11:2650481:A_G	11	2650481	A	G	SNV	NONCODING_CHANGE	5	non_coding_exon			ENSG00000269821	ENST00000597346	KCNQ1OT1		4.311	k50.3	rs10430888
11:2650481:A_G	11	2650481	A	G	SNV	NONCODING_CHANGE	5	non_coding_exon			ENSG00000269821	ENST00000597346	KCNQ1OT1		4.311	k50.1	rs10430888
11:2651410:C_T	11	2651410	T	C	SNV	NONCODING_CHANGE	5	non_coding_exon			ENSG00000269821	ENST00000597346	KCNQ1OT1		5.466	k50.1	rs4271371
11:2651410:C_T	11	2651410	T	C	SNV	NONCODING_CHANGE	5	non_coding_exon			ENSG00000269821	ENST00000597346	KCNQ1OT1		5.466	k50.3	rs4271371
11:2651593:A_G	11	2651593	A	G	SNV	NONCODING_CHANGE	5	non_coding_exon			ENSG00000269821	ENST00000597346	KCNQ1OT1		0.321	k50.3	rs10430889
11:2651593:A_G	11	2651593	A	G	SNV	NONCODING_CHANGE	5	non_coding_exon			ENSG00000269821	ENST00000597346	KCNQ1OT1		0.321	k50.1	rs10430889
11:2662265:C_T	11	2662265	T	C	SNV	NONCODING_CHANGE	5	non_coding_exon			ENSG00000269821	ENST00000597346	KCNQ1OT1		10.71	k50.3	rs4930004
11:2662265:C_T	11	2662265	T	C	SNV	NONCODING_CHANGE	5	non_coding_exon			ENSG00000269821	ENST00000597346	KCNQ1OT1		10.71	k50.1	rs4930004
11:2673575:A_G	11	2673575	G	A	SNV	NONCODING_CHANGE	5	non_coding_exon			ENSG00000269821	ENST00000597346	KCNQ1OT1		10.56	k50.1	rs6578283
11:2673575:A_G	11	2673575	G	A	SNV	NONCODING_CHANGE	5	non_coding_exon			ENSG00000269821	ENST00000597346	KCNQ1OT1		10.56	k50.3	rs6578283
11:2677361:C_T	11	2677361	C	T	SNV	NONCODING_CHANGE	5	non_coding_exon			ENSG00000269821	ENST00000597346	KCNQ1OT1		1.148	k50.3	rs231344
11:2677361:C_T	11	2677361	C	T	SNV	NONCODING_CHANGE	5	non_coding_exon			ENSG00000269821	ENST00000597346	KCNQ1OT1		1.148	k50.1	rs231344
11:2924591:A_G	11	2924591	G	A	SNV	NON_SYNONYMOUS	7	missense	A	T	ENSG00000110628	ENST00000380574	SLC22A18	6	9.265	k50.3	rs1048046
11:2924591:A_G	11	2924591	G	A	SNV	NON_SYNONYMOUS	7	missense	A	T	ENSG00000110628	ENST00000380574	SLC22A18	6	9.265	k50.2	rs1048046
11:2646620:A_G	11	2646620	A	G	SNV	NONCODING_CHANGE	5	non_coding_exon			ENSG00000269821	ENST00000597346	KCNQ1OT1		3.867	k50.3	rs7118939
2:220355529:A_G	2	220355529	A	G	SNV	NON_SYNONYMOUS	7	missense	H	R	ENSG00000072195	ENST00000312358	SPEG	3079	12.89	k52.1	rs12464085
3:185331165:A_C	3	185331165	C	A	SNV	NON_SYNONYMOUS	7	missense	T	K	ENSG00000163904	ENST00000296257	SENP2	301	9.591	k53.1	rs6762208
1:15911349:A_G	1	15911349	G	A	SNV	SYNONYMOUS	5	synonymous	D	D	ENSG00000116771	ENST00000375826	AGMAT	38	4.526	k55.1	rs3737705
1:16577908:C_G	1	16577908	G	C	SNV	NON_SYNONYMOUS	7	missense	P	A	ENSG00000037637	ENST00000375592	FBXO42	471	11.54	k55.2	rs12069239
4:103866480:A_G	4	103866480	G	A	SNV	SPLICE_SITE	5	splice,intron			ENSG00000164037	ENST00000296422	SLC9B1		14.29	k59.1	rs3974494
2:211319824:C_T	2	211319824	T	C	SNV	SPLICE_SITE	5	splice,intron			ENSG00000115365	ENST00000443314	LANCL1		0.324	k6.2	rs2287432
22:42473860:C_G	22	42473860	C	G	SNV	NON_SYNONYMOUS	7	missense	A	G	ENSG00000177096	ENST00000321753	PHETA2	188	0.001	k62.2	rs1807493
22:42473860:C_G	22	42473860	C	G	SNV	NON_SYNONYMOUS	7	missense	A	G	ENSG00000177096	ENST00000321753	PHETA2	188	0.001	k62.3	rs1807493
22:43195147:A_G	22	43195147	A	G	SNV	SYNONYMOUS	5	synonymous	S	S	ENSG00000242247	ENST00000263245	ARFGAP3	477	6.207	k62.3	rs1128013
22:43203137:C_T	22	43203137	C	T	SNV	SYNONYMOUS	5	synonymous	S	S	ENSG00000242247	ENST00000263245	ARFGAP3	451	0.2	k62.3	rs738535
22:43289473:A_G	22	43289473	G	A	SNV	SYNONYMOUS	5	synonymous	L	L	ENSG00000100266	ENST00000263246	PACSIN2	69	4.251	k62.3	rs5759013
3:121641693:A_G	3	121641693	G	A	SNV	SYNONYMOUS	5	synonymous	A	A	ENSG00000163406	ENST00000489711	SLC15A2	284	13.44	k64.1	rs2293616
3:121643804:C_T	3	121643804	C	T	SNV	NON_SYNONYMOUS	7	missense	L	F	ENSG00000163406	ENST00000489711	SLC15A2	350	14.98	k64.1	rs2257212
3:121646641:A_G	3	121646641	A	G	SNV	SYNONYMOUS	5	synonymous	A	A	ENSG00000163406	ENST00000489711	SLC15A2	387	10.39	k64.1	rs1143670
3:121648168:A_G	3	121648168	G	A	SNV	NON_SYNONYMOUS	7	missense	R	K	ENSG00000163406	ENST00000489711	SLC15A2	509	11.91	k64.1	rs1143672
1:23688933:A_G	1	23688933	A	G	SNV	SYNONYMOUS	5	synonymous	N	N	ENSG00000125945	ENST00000314011	ZNF436	314	10.37	k65.1	rs2849028
1:23689083:A_G	1	23689083	G	A	SNV	SYNONYMOUS	5	synonymous	H	H	ENSG00000125945	ENST00000314011	ZNF436	264	10.66	k65.1	rs3795308
2:170088351:A_G	2	170088351	G	A	SNV	SPLICE_SITE	5	splice,synonymous	S	S	ENSG00000081479	ENST00000263816	LRP2	1700	0.145	k67.1	rs2302694
17:59485555:C_T	17	59485555	C	T	SNV	SYNONYMOUS	5	synonymous	S	S	ENSG00000121068	ENST00000240328	TBX2	609	11.87	k7.3	rs1057987
6:30695920:C_T	6	30695920	C	T	SNV	SPLICE_SITE	5	splice,synonymous	V	V	ENSG00000137312	ENST00000376389	FLOT1	419	14.22	k73.1	rs1136719
6:30695920:C_T	6	30695920	C	T	SNV	SPLICE_SITE	5	splice,synonymous	V	V	ENSG00000137312	ENST00000376389	FLOT1	419	14.22	k73.9	rs1136719
6:30695920:C_T	6	30695920	C	T	SNV	SPLICE_SITE	5	splice,synonymous	V	V	ENSG00000137312	ENST00000376389	FLOT1	419	14.22	k73.6	rs1136719
6:30695920:C_T	6	30695920	C	T	SNV	SPLICE_SITE	5	splice,synonymous	V	V	ENSG00000137312	ENST00000376389	FLOT1	419	14.22	k73.8	rs1136719
6:30695920:C_T	6	30695920	C	T	SNV	SPLICE_SITE	5	splice,synonymous	V	V	ENSG00000137312	ENST00000376389	FLOT1	419	14.22	k73.7	rs1136719
6:30919391:A_G	6	30919391	G	A	SNV	SYNONYMOUS	5	synonymous	S	S	ENSG00000168631	ENST00000462446	MUCL3	1050	0.13	k73.6	rs3094086
6:30919391:A_G	6	30919391	G	A	SNV	SYNONYMOUS	5	synonymous	S	S	ENSG00000168631	ENST00000462446	MUCL3	1050	0.13	k73.9	rs3094086
6:30919391:A_G	6	30919391	G	A	SNV	SYNONYMOUS	5	synonymous	S	S	ENSG00000168631	ENST00000462446	MUCL3	1050	0.13	k73.1	rs3094086
6:30919391:A_G	6	30919391	G	A	SNV	SYNONYMOUS	5	synonymous	S	S	ENSG00000168631	ENST00000462446	MUCL3	1050	0.13	k73.7	rs3094086
6:30919391:A_G	6	30919391	G	A	SNV	SYNONYMOUS	5	synonymous	S	S	ENSG00000168631	ENST00000462446	MUCL3	1050	0.13	k73.8	rs3094086
6:30920124:A_G	6	30920124	G	A	SNV	NON_SYNONYMOUS	7	missense	E	K	ENSG00000168631	ENST00000462446	MUCL3	1295	0.004	k73.1	rs3132580
6:30920124:A_G	6	30920124	G	A	SNV	NON_SYNONYMOUS	7	missense	E	K	ENSG00000168631	ENST00000462446	MUCL3	1295	0.004	k73.8	rs3132580
6:30920124:A_G	6	30920124	G	A	SNV	NON_SYNONYMOUS	7	missense	E	K	ENSG00000168631	ENST00000462446	MUCL3	1295	0.004	k73.9	rs3132580
6:30920124:A_G	6	30920124	G	A	SNV	NON_SYNONYMOUS	7	missense	E	K	ENSG00000168631	ENST00000462446	MUCL3	1295	0.004	k73.6	rs3132580
6:30920124:A_G	6	30920124	G	A	SNV	NON_SYNONYMOUS	7	missense	E	K	ENSG00000168631	ENST00000462446	MUCL3	1295	0.004	k73.7	rs3132580
6:30994232:A_G	6	30994232	A	G	SNV	NON_SYNONYMOUS	7	missense	M	V	ENSG00000261272	ENST00000561890	MUC22	342	0.007	k73.7	rs116938859
6:30994232:A_G	6	30994232	A	G	SNV	NON_SYNONYMOUS	7	missense	M	V	ENSG00000261272	ENST00000561890	MUC22	342	0.007	k73.6	rs116938859
6:30994232:A_G	6	30994232	A	G	SNV	NON_SYNONYMOUS	7	missense	M	V	ENSG00000261272	ENST00000561890	MUC22	342	0.007	k73.9	rs116938859
6:30994232:A_G	6	30994232	A	G	SNV	NON_SYNONYMOUS	7	missense	M	V	ENSG00000261272	ENST00000561890	MUC22	342	0.007	k73.8	rs116938859
6:30994232:A_G	6	30994232	A	G	SNV	NON_SYNONYMOUS	7	missense	M	V	ENSG00000261272	ENST00000561890	MUC22	342	0.007	k73.1	rs116938859
6:30994778:A_G	6	30994778	A	G	SNV	NON_SYNONYMOUS	7	missense	K	E	ENSG00000261272	ENST00000561890	MUC22	524	1.135	k73.9	rs117058095
6:30994778:A_G	6	30994778	A	G	SNV	NON_SYNONYMOUS	7	missense	K	E	ENSG00000261272	ENST00000561890	MUC22	524	1.135	k73.6	rs117058095
6:30994778:A_G	6	30994778	A	G	SNV	NON_SYNONYMOUS	7	missense	K	E	ENSG00000261272	ENST00000561890	MUC22	524	1.135	k73.8	rs117058095
6:30994778:A_G	6	30994778	A	G	SNV	NON_SYNONYMOUS	7	missense	K	E	ENSG00000261272	ENST00000561890	MUC22	524	1.135	k73.1	rs117058095
6:30994778:A_G	6	30994778	A	G	SNV	NON_SYNONYMOUS	7	missense	K	E	ENSG00000261272	ENST00000561890	MUC22	524	1.135	k73.7	rs117058095
6:30996889:A_G	6	30996889	G	A	SNV	SYNONYMOUS	5	synonymous	T	T	ENSG00000261272	ENST00000561890	MUC22	1227	0.007	k73.1	rs144914215
6:30996889:A_G	6	30996889	G	A	SNV	SYNONYMOUS	5	synonymous	T	T	ENSG00000261272	ENST00000561890	MUC22	1227	0.007	k73.9	rs144914215
6:30996889:A_G	6	30996889	G	A	SNV	SYNONYMOUS	5	synonymous	T	T	ENSG00000261272	ENST00000561890	MUC22	1227	0.007	k73.8	rs144914215
6:30996889:A_G	6	30996889	G	A	SNV	SYNONYMOUS	5	synonymous	T	T	ENSG00000261272	ENST00000561890	MUC22	1227	0.007	k73.6	rs144914215
6:30996889:A_G	6	30996889	G	A	SNV	SYNONYMOUS	5	synonymous	T	T	ENSG00000261272	ENST00000561890	MUC22	1227	0.007	k73.7	rs144914215
6:30997275:C_G	6	30997275	C	G	SNV	NON_SYNONYMOUS	7	missense	T	R	ENSG00000261272	ENST00000561890	MUC22	1356	5.876	k73.6	rs146685560
6:30997275:C_G	6	30997275	C	G	SNV	NON_SYNONYMOUS	7	missense	T	R	ENSG00000261272	ENST00000561890	MUC22	1356	5.876	k73.7	rs146685560
6:30997275:C_G	6	30997275	C	G	SNV	NON_SYNONYMOUS	7	missense	T	R	ENSG00000261272	ENST00000561890	MUC22	1356	5.876	k73.8	rs146685560
6:30997275:C_G	6	30997275	C	G	SNV	NON_SYNONYMOUS	7	missense	T	R	ENSG00000261272	ENST00000561890	MUC22	1356	5.876	k73.1	rs146685560
6:30997275:C_G	6	30997275	C	G	SNV	NON_SYNONYMOUS	7	missense	T	R	ENSG00000261272	ENST00000561890	MUC22	1356	5.876	k73.9	rs146685560
6:31024175:C_T	6	31024175	T	C	SNV	NONCODING_CHANGE	5	non_coding_exon			ENSG00000228789	ENST00000426185	HCG22		0.712	k73.1	rs117227928
6:31024175:C_T	6	31024175	T	C	SNV	NONCODING_CHANGE	5	non_coding_exon			ENSG00000228789	ENST00000426185	HCG22		0.712	k73.8	rs117227928
6:31024175:C_T	6	31024175	T	C	SNV	NONCODING_CHANGE	5	non_coding_exon			ENSG00000228789	ENST00000426185	HCG22		0.712	k73.9	rs117227928
6:31024175:C_T	6	31024175	T	C	SNV	NONCODING_CHANGE	5	non_coding_exon			ENSG00000228789	ENST00000426185	HCG22		0.712	k73.7	rs117227928
6:31024175:C_T	6	31024175	T	C	SNV	NONCODING_CHANGE	5	non_coding_exon			ENSG00000228789	ENST00000426185	HCG22		0.712	k73.6	rs117227928
6:31079703:C_G	6	31079703	C	G	SNV	NON_SYNONYMOUS	7	missense	A	P	ENSG00000204542	ENST00000259870	C6orf15	145	0.037	k73.6	rs2233978
6:31079703:C_G	6	31079703	C	G	SNV	NON_SYNONYMOUS	7	missense	A	P	ENSG00000204542	ENST00000259870	C6orf15	145	0.037	k73.1	rs2233978
6:31079703:C_G	6	31079703	C	G	SNV	NON_SYNONYMOUS	7	missense	A	P	ENSG00000204542	ENST00000259870	C6orf15	145	0.037	k73.9	rs2233978
6:31079703:C_G	6	31079703	C	G	SNV	NON_SYNONYMOUS	7	missense	A	P	ENSG00000204542	ENST00000259870	C6orf15	145	0.037	k73.7	rs2233978
6:31079703:C_G	6	31079703	C	G	SNV	NON_SYNONYMOUS	7	missense	A	P	ENSG00000204542	ENST00000259870	C6orf15	145	0.037	k73.8	rs2233978
6:31085200:A_G	6	31085200	A	G	SNV	SYNONYMOUS	5	synonymous	G	G	ENSG00000204539	ENST00000376288	CDSN	64	3.969	k73.7	rs3132553
6:31085200:A_G	6	31085200	A	G	SNV	SYNONYMOUS	5	synonymous	G	G	ENSG00000204539	ENST00000376288	CDSN	64	3.969	k73.8	rs3132553
6:31085200:A_G	6	31085200	A	G	SNV	SYNONYMOUS	5	synonymous	G	G	ENSG00000204539	ENST00000376288	CDSN	64	3.969	k73.9	rs3132553
6:31085200:A_G	6	31085200	A	G	SNV	SYNONYMOUS	5	synonymous	G	G	ENSG00000204539	ENST00000376288	CDSN	64	3.969	k73.1	rs3132553
6:31085200:A_G	6	31085200	A	G	SNV	SYNONYMOUS	5	synonymous	G	G	ENSG00000204539	ENST00000376288	CDSN	64	3.969	k73.6	rs3132553
6:31239776:A_C	6	31239776	A	C	SNV	NON_SYNONYMOUS	7	splice,missense	C	G	ENSG00000204525	ENST00000376228	HLA-C	25	8.405	k73.1	rs2074493
6:31239776:A_C	6	31239776	A	C	SNV	NON_SYNONYMOUS	7	splice,missense	C	G	ENSG00000204525	ENST00000376228	HLA-C	25	8.405	k73.9	rs2074493
6:31239776:A_C	6	31239776	A	C	SNV	NON_SYNONYMOUS	7	splice,missense	C	G	ENSG00000204525	ENST00000376228	HLA-C	25	8.405	k73.8	rs2074493
6:31239776:A_C	6	31239776	A	C	SNV	NON_SYNONYMOUS	7	splice,missense	C	G	ENSG00000204525	ENST00000376228	HLA-C	25	8.405	k73.7	rs2074493
6:31239776:A_C	6	31239776	A	C	SNV	NON_SYNONYMOUS	7	splice,missense	C	G	ENSG00000204525	ENST00000376228	HLA-C	25	8.405	k73.6	rs2074493
6:31379752:C_T	6	31379752	C	T	SNV	SYNONYMOUS	5	synonymous	S	S	ENSG00000204520	ENST00000449934	MICA	214	0.366	k73.9	rs17206680
6:31379752:C_T	6	31379752	C	T	SNV	SYNONYMOUS	5	synonymous	S	S	ENSG00000204520	ENST00000449934	MICA	214	0.366	k73.6	rs17206680
6:31379752:C_T	6	31379752	C	T	SNV	SYNONYMOUS	5	synonymous	S	S	ENSG00000204520	ENST00000449934	MICA	214	0.366	k73.7	rs17206680
6:31379752:C_T	6	31379752	C	T	SNV	SYNONYMOUS	5	synonymous	S	S	ENSG00000204520	ENST00000449934	MICA	214	0.366	k73.8	rs17206680
6:31379752:C_T	6	31379752	C	T	SNV	SYNONYMOUS	5	synonymous	S	S	ENSG00000204520	ENST00000449934	MICA	214	0.366	k73.1	rs17206680
6:31598489:A_G	6	31598489	A	G	SNV	SYNONYMOUS	5	synonymous	V	V	ENSG00000204469	ENST00000376033	PRRC2A	792	10.98	k73.6	rs3130626
6:31598489:A_G	6	31598489	A	G	SNV	SYNONYMOUS	5	synonymous	V	V	ENSG00000204469	ENST00000376033	PRRC2A	792	10.98	k73.9	rs3130626
6:31598489:A_G	6	31598489	A	G	SNV	SYNONYMOUS	5	synonymous	V	V	ENSG00000204469	ENST00000376033	PRRC2A	792	10.98	k73.7	rs3130626
6:31598489:A_G	6	31598489	A	G	SNV	SYNONYMOUS	5	synonymous	V	V	ENSG00000204469	ENST00000376033	PRRC2A	792	10.98	k73.8	rs3130626
6:31598489:A_G	6	31598489	A	G	SNV	SYNONYMOUS	5	synonymous	V	V	ENSG00000204469	ENST00000376033	PRRC2A	792	10.98	k73.1	rs3130626
6:31599594:A_G	6	31599594	A	G	SNV	SYNONYMOUS	5	synonymous	G	G	ENSG00000204469	ENST00000376033	PRRC2A	1048	10.26	k73.7	rs10947220
6:31599594:A_G	6	31599594	A	G	SNV	SYNONYMOUS	5	synonymous	G	G	ENSG00000204469	ENST00000376033	PRRC2A	1048	10.26	k73.6	rs10947220
6:31599594:A_G	6	31599594	A	G	SNV	SYNONYMOUS	5	synonymous	G	G	ENSG00000204469	ENST00000376033	PRRC2A	1048	10.26	k73.8	rs10947220
6:31599594:A_G	6	31599594	A	G	SNV	SYNONYMOUS	5	synonymous	G	G	ENSG00000204469	ENST00000376033	PRRC2A	1048	10.26	k73.9	rs10947220
6:31599594:A_G	6	31599594	A	G	SNV	SYNONYMOUS	5	synonymous	G	G	ENSG00000204469	ENST00000376033	PRRC2A	1048	10.26	k73.1	rs10947220
6:31603770:A_G	6	31603770	A	G	SNV	SYNONYMOUS	5	synonymous	Q	Q	ENSG00000204469	ENST00000376033	PRRC2A	1856	6.817	k73.8	rs11229
6:31603770:A_G	6	31603770	A	G	SNV	SYNONYMOUS	5	synonymous	Q	Q	ENSG00000204469	ENST00000376033	PRRC2A	1856	6.817	k73.1	rs11229
6:31603770:A_G	6	31603770	A	G	SNV	SYNONYMOUS	5	synonymous	Q	Q	ENSG00000204469	ENST00000376033	PRRC2A	1856	6.817	k73.9	rs11229
6:31603770:A_G	6	31603770	A	G	SNV	SYNONYMOUS	5	synonymous	Q	Q	ENSG00000204469	ENST00000376033	PRRC2A	1856	6.817	k73.6	rs11229
6:31603770:A_G	6	31603770	A	G	SNV	SYNONYMOUS	5	synonymous	Q	Q	ENSG00000204469	ENST00000376033	PRRC2A	1856	6.817	k73.7	rs11229
6:31611746:A_G	6	31611746	G	A	SNV	SYNONYMOUS	5	synonymous	A	A	ENSG00000204463	ENST00000375964	BAG6	529	4.805	k73.1	rs7770976
6:31611746:A_G	6	31611746	G	A	SNV	SYNONYMOUS	5	synonymous	A	A	ENSG00000204463	ENST00000375964	BAG6	529	4.805	k73.7	rs7770976
6:31611746:A_G	6	31611746	G	A	SNV	SYNONYMOUS	5	synonymous	A	A	ENSG00000204463	ENST00000375964	BAG6	529	4.805	k73.9	rs7770976
6:31611746:A_G	6	31611746	G	A	SNV	SYNONYMOUS	5	synonymous	A	A	ENSG00000204463	ENST00000375964	BAG6	529	4.805	k73.8	rs7770976
6:31611746:A_G	6	31611746	G	A	SNV	SYNONYMOUS	5	synonymous	A	A	ENSG00000204463	ENST00000375964	BAG6	529	4.805	k73.6	rs7770976
6:31675501:A_G	6	31675501	G	A	SNV	NON_SYNONYMOUS	7	missense	A	T	ENSG00000204424	ENST00000375832	LY6G6F	107	13.41	k73.7	rs9267547
6:31675501:A_G	6	31675501	G	A	SNV	NON_SYNONYMOUS	7	missense	A	T	ENSG00000204424	ENST00000375832	LY6G6F	107	13.41	k73.8	rs9267547
6:31675501:A_G	6	31675501	G	A	SNV	NON_SYNONYMOUS	7	missense	A	T	ENSG00000204424	ENST00000375832	LY6G6F	107	13.41	k73.1	rs9267547
6:31675501:A_G	6	31675501	G	A	SNV	NON_SYNONYMOUS	7	missense	A	T	ENSG00000204424	ENST00000375832	LY6G6F	107	13.41	k73.9	rs9267547
6:31675501:A_G	6	31675501	G	A	SNV	NON_SYNONYMOUS	7	missense	A	T	ENSG00000204424	ENST00000375832	LY6G6F	107	13.41	k73.6	rs9267547
6:31687008:A_G	6	31687008	G	A	SNV	SYNONYMOUS	5	synonymous	R	R	ENSG00000204421	ENST00000375819	LY6G6C	81	11.47	k73.7	rs1065356
6:31687008:A_G	6	31687008	G	A	SNV	SYNONYMOUS	5	synonymous	R	R	ENSG00000204421	ENST00000375819	LY6G6C	81	11.47	k73.1	rs1065356
6:31687008:A_G	6	31687008	G	A	SNV	SYNONYMOUS	5	synonymous	R	R	ENSG00000204421	ENST00000375819	LY6G6C	81	11.47	k73.8	rs1065356
6:31687008:A_G	6	31687008	G	A	SNV	SYNONYMOUS	5	synonymous	R	R	ENSG00000204421	ENST00000375819	LY6G6C	81	11.47	k73.9	rs1065356
6:31687008:A_G	6	31687008	G	A	SNV	SYNONYMOUS	5	synonymous	R	R	ENSG00000204421	ENST00000375819	LY6G6C	81	11.47	k73.6	rs1065356
6:31691657:A_G	6	31691657	G	A	SNV	SYNONYMOUS	5	synonymous	G	G	ENSG00000204420	ENST00000375806	MPIG6B	101	9.845	k73.8	rs453098
6:31691657:A_G	6	31691657	G	A	SNV	SYNONYMOUS	5	synonymous	G	G	ENSG00000204420	ENST00000375806	MPIG6B	101	9.845	k73.6	rs453098
6:31691657:A_G	6	31691657	G	A	SNV	SYNONYMOUS	5	synonymous	G	G	ENSG00000204420	ENST00000375806	MPIG6B	101	9.845	k73.7	rs453098
6:31691657:A_G	6	31691657	G	A	SNV	SYNONYMOUS	5	synonymous	G	G	ENSG00000204420	ENST00000375806	MPIG6B	101	9.845	k73.9	rs453098
6:31691657:A_G	6	31691657	G	A	SNV	SYNONYMOUS	5	synonymous	G	G	ENSG00000204420	ENST00000375806	MPIG6B	101	9.845	k73.1	rs453098
6:31732207:C_T	6	31732207	C	T	SNV	SPLICE_SITE	5	splice,intron			ENSG00000228727	ENST00000415669	SAPCD1		11.1	k73.8	rs9461719
6:31732207:C_T	6	31732207	C	T	SNV	SPLICE_SITE	5	splice,intron			ENSG00000228727	ENST00000415669	SAPCD1		11.1	k73.1	rs9461719
6:31732207:C_T	6	31732207	C	T	SNV	SPLICE_SITE	5	splice,intron,NMD			ENSG00000255152	ENST00000493662	MSH5-SAPCD1		11.1	k73.6	rs9461719
6:31732207:C_T	6	31732207	C	T	SNV	SPLICE_SITE	5	splice,intron,NMD			ENSG00000255152	ENST00000493662	MSH5-SAPCD1		11.1	k73.1	rs9461719
6:31732207:C_T	6	31732207	C	T	SNV	SPLICE_SITE	5	splice,intron,NMD			ENSG00000255152	ENST00000493662	MSH5-SAPCD1		11.1	k73.8	rs9461719
6:31732207:C_T	6	31732207	C	T	SNV	SPLICE_SITE	5	splice,intron			ENSG00000228727	ENST00000415669	SAPCD1		11.1	k73.6	rs9461719
6:31732207:C_T	6	31732207	C	T	SNV	SPLICE_SITE	5	splice,intron,NMD			ENSG00000255152	ENST00000493662	MSH5-SAPCD1		11.1	k73.7	rs9461719
6:31732207:C_T	6	31732207	C	T	SNV	SPLICE_SITE	5	splice,intron			ENSG00000228727	ENST00000415669	SAPCD1		11.1	k73.7	rs9461719
6:31732207:C_T	6	31732207	C	T	SNV	SPLICE_SITE	5	splice,intron			ENSG00000228727	ENST00000415669	SAPCD1		11.1	k73.9	rs9461719
6:31732207:C_T	6	31732207	C	T	SNV	SPLICE_SITE	5	splice,intron,NMD			ENSG00000255152	ENST00000493662	MSH5-SAPCD1		11.1	k73.9	rs9461719
6:31748820:A_G	6	31748820	G	A	SNV	SYNONYMOUS	5	synonymous	D	D	ENSG00000204394	ENST00000375663	VARS1	875	7.405	k73.9	rs707926
6:31748820:A_G	6	31748820	G	A	SNV	SYNONYMOUS	5	synonymous	D	D	ENSG00000204394	ENST00000375663	VARS1	875	7.405	k73.6	rs707926
6:31748820:A_G	6	31748820	G	A	SNV	SYNONYMOUS	5	synonymous	D	D	ENSG00000204394	ENST00000375663	VARS1	875	7.405	k73.1	rs707926
6:31748820:A_G	6	31748820	G	A	SNV	SYNONYMOUS	5	synonymous	D	D	ENSG00000204394	ENST00000375663	VARS1	875	7.405	k73.8	rs707926
6:31748820:A_G	6	31748820	G	A	SNV	SYNONYMOUS	5	synonymous	D	D	ENSG00000204394	ENST00000375663	VARS1	875	7.405	k73.7	rs707926
6:31753423:C_T	6	31753423	T	C	SNV	SYNONYMOUS	5	synonymous	L	L	ENSG00000204394	ENST00000375663	VARS1	396	10.65	k73.8	rs35756329
6:31753423:C_T	6	31753423	T	C	SNV	SYNONYMOUS	5	synonymous	L	L	ENSG00000204394	ENST00000375663	VARS1	396	10.65	k73.6	rs35756329
6:31753423:C_T	6	31753423	T	C	SNV	SYNONYMOUS	5	synonymous	L	L	ENSG00000204394	ENST00000375663	VARS1	396	10.65	k73.9	rs35756329
6:31753423:C_T	6	31753423	T	C	SNV	SYNONYMOUS	5	synonymous	L	L	ENSG00000204394	ENST00000375663	VARS1	396	10.65	k73.1	rs35756329
6:31753423:C_T	6	31753423	T	C	SNV	SYNONYMOUS	5	synonymous	L	L	ENSG00000204394	ENST00000375663	VARS1	396	10.65	k73.7	rs35756329
6:32135137:A_G	6	32135137	G	A	SNV	SYNONYMOUS	5	synonymous	A	A	ENSG00000241404	ENST00000395512	EGFL8	204	4.303	k73.6	rs41268924
6:32135137:A_G	6	32135137	G	A	SNV	SYNONYMOUS	5	synonymous	A	A	ENSG00000241404	ENST00000395512	EGFL8	204	4.303	k73.7	rs41268924
6:32135137:A_G	6	32135137	G	A	SNV	SYNONYMOUS	5	synonymous	A	A	ENSG00000241404	ENST00000395512	EGFL8	204	4.303	k73.4	rs41268924
6:32135137:A_G	6	32135137	G	A	SNV	SYNONYMOUS	5	synonymous	A	A	ENSG00000241404	ENST00000395512	EGFL8	204	4.303	k73.1	rs41268924
6:32135137:A_G	6	32135137	G	A	SNV	SYNONYMOUS	5	synonymous	A	A	ENSG00000241404	ENST00000395512	EGFL8	204	4.303	k73.8	rs41268924
6:32135137:A_G	6	32135137	G	A	SNV	SYNONYMOUS	5	synonymous	A	A	ENSG00000241404	ENST00000395512	EGFL8	204	4.303	k73.9	rs41268924
6:32147478:G_T	6	32147478	G	T	SNV	SYNONYMOUS	5	synonymous	G	G	ENSG00000204308	ENST00000375094	RNF5	70	11.1	k73.7	rs57409105
6:32147478:G_T	6	32147478	G	T	SNV	SYNONYMOUS	5	synonymous	G	G	ENSG00000204308	ENST00000375094	RNF5	70	11.1	k73.1	rs57409105
6:32147478:G_T	6	32147478	G	T	SNV	SYNONYMOUS	5	synonymous	G	G	ENSG00000204308	ENST00000375094	RNF5	70	11.1	k73.9	rs57409105
6:32147478:G_T	6	32147478	G	T	SNV	SYNONYMOUS	5	synonymous	G	G	ENSG00000204308	ENST00000375094	RNF5	70	11.1	k73.6	rs57409105
6:32147478:G_T	6	32147478	G	T	SNV	SYNONYMOUS	5	synonymous	G	G	ENSG00000204308	ENST00000375094	RNF5	70	11.1	k73.4	rs57409105
6:32147478:G_T	6	32147478	G	T	SNV	SYNONYMOUS	5	synonymous	G	G	ENSG00000204308	ENST00000375094	RNF5	70	11.1	k73.8	rs57409105
6:32149260:C_T	6	32149260	C	T	SNV	SPLICE_SITE	5	splice,intron			ENSG00000204305	ENST00000375076	AGER		11.82	k73.7	rs2071288
6:32149260:C_T	6	32149260	C	T	SNV	SPLICE_SITE	5	splice,intron			ENSG00000204305	ENST00000375076	AGER		11.82	k73.6	rs2071288
6:32149260:C_T	6	32149260	C	T	SNV	SPLICE_SITE	5	splice,intron			ENSG00000204305	ENST00000375076	AGER		11.82	k73.4	rs2071288
6:32149260:C_T	6	32149260	C	T	SNV	SPLICE_SITE	5	splice,intron			ENSG00000204305	ENST00000375076	AGER		11.82	k73.1	rs2071288
6:32149260:C_T	6	32149260	C	T	SNV	SPLICE_SITE	5	splice,intron			ENSG00000204305	ENST00000375076	AGER		11.82	k73.9	rs2071288
6:32149260:C_T	6	32149260	C	T	SNV	SPLICE_SITE	5	splice,intron			ENSG00000204305	ENST00000375076	AGER		11.82	k73.8	rs2071288
6:32159956:C_T	6	32159956	T	C	SNV	SYNONYMOUS	5	synonymous	P	P	ENSG00000213654	ENST00000375040	GPSM3	38	7.829	k73.7	rs3134605
6:32159956:C_T	6	32159956	T	C	SNV	SYNONYMOUS	5	synonymous	P	P	ENSG00000213654	ENST00000375040	GPSM3	38	7.829	k73.6	rs3134605
6:32159956:C_T	6	32159956	T	C	SNV	SYNONYMOUS	5	synonymous	P	P	ENSG00000213654	ENST00000375040	GPSM3	38	7.829	k73.1	rs3134605
6:32159956:C_T	6	32159956	T	C	SNV	SYNONYMOUS	5	synonymous	P	P	ENSG00000213654	ENST00000375040	GPSM3	38	7.829	k73.8	rs3134605
6:32159956:C_T	6	32159956	T	C	SNV	SYNONYMOUS	5	synonymous	P	P	ENSG00000213654	ENST00000375040	GPSM3	38	7.829	k73.4	rs3134605
6:32159956:C_T	6	32159956	T	C	SNV	SYNONYMOUS	5	synonymous	P	P	ENSG00000213654	ENST00000375040	GPSM3	38	7.829	k73.9	rs3134605
6:32169145:A_G	6	32169145	G	A	SNV	SYNONYMOUS	5	synonymous	S	S	ENSG00000204301	ENST00000375023	NOTCH4	1296	10.09	k73.8	rs8192574
6:32169145:A_G	6	32169145	G	A	SNV	SYNONYMOUS	5	synonymous	S	S	ENSG00000204301	ENST00000375023	NOTCH4	1296	10.09	k73.6	rs8192574
6:32169145:A_G	6	32169145	G	A	SNV	SYNONYMOUS	5	synonymous	S	S	ENSG00000204301	ENST00000375023	NOTCH4	1296	10.09	k73.4	rs8192574
6:32169145:A_G	6	32169145	G	A	SNV	SYNONYMOUS	5	synonymous	S	S	ENSG00000204301	ENST00000375023	NOTCH4	1296	10.09	k73.7	rs8192574
6:32169145:A_G	6	32169145	G	A	SNV	SYNONYMOUS	5	synonymous	S	S	ENSG00000204301	ENST00000375023	NOTCH4	1296	10.09	k73.9	rs8192574
6:32169145:A_G	6	32169145	G	A	SNV	SYNONYMOUS	5	synonymous	S	S	ENSG00000204301	ENST00000375023	NOTCH4	1296	10.09	k73.1	rs8192574
6:34211238:C_T	6	34211238	C	T	SNV	SPLICE_SITE	5	splice,intron			ENSG00000137309	ENST00000447654	HMGA1		7.266	k73.6	rs41269028
6:34211238:C_T	6	34211238	C	T	SNV	SPLICE_SITE	5	splice,intron			ENSG00000137309	ENST00000447654	HMGA1		7.266	k73.3	rs41269028
6:34211238:C_T	6	34211238	C	T	SNV	SPLICE_SITE	5	splice,intron			ENSG00000137309	ENST00000447654	HMGA1		7.266	k73.9	rs41269028
6:34211238:C_T	6	34211238	C	T	SNV	SPLICE_SITE	5	splice,intron			ENSG00000137309	ENST00000447654	HMGA1		7.266	k73.7	rs41269028
6:34211238:C_T	6	34211238	C	T	SNV	SPLICE_SITE	5	splice,intron			ENSG00000137309	ENST00000447654	HMGA1		7.266	k73.8	rs41269028
6:33272855:C_G	6	33272855	G	C	SNV	NON_SYNONYMOUS	7	missense	T	R	ENSG00000231925	ENST00000426633	TAPBP	260	12.53	k73.7	rs2071888
6:33272855:C_G	6	33272855	G	C	SNV	NON_SYNONYMOUS	7	missense	T	R	ENSG00000231925	ENST00000426633	TAPBP	260	12.53	k73.5	rs2071888
6:33272855:C_G	6	33272855	G	C	SNV	NON_SYNONYMOUS	7	missense	T	R	ENSG00000231925	ENST00000426633	TAPBP	260	12.53	k73.9	rs2071888
6:33272855:C_G	6	33272855	G	C	SNV	NON_SYNONYMOUS	7	missense	T	R	ENSG00000231925	ENST00000426633	TAPBP	260	12.53	k73.8	rs2071888
6:33272855:C_G	6	33272855	G	C	SNV	NON_SYNONYMOUS	7	missense	T	R	ENSG00000231925	ENST00000426633	TAPBP	260	12.53	k73.6	rs2071888
6:33283766:C_T	6	33283766	T	C	SNV	NON_SYNONYMOUS	7	missense	T	A	ENSG00000236104	ENST00000431845	ZBTB22	310	7.139	k73.8	rs3130100
6:33283766:C_T	6	33283766	T	C	SNV	NON_SYNONYMOUS	7	missense	T	A	ENSG00000236104	ENST00000431845	ZBTB22	310	7.139	k73.6	rs3130100
6:33283766:C_T	6	33283766	T	C	SNV	NON_SYNONYMOUS	7	missense	T	A	ENSG00000236104	ENST00000431845	ZBTB22	310	7.139	k73.5	rs3130100
6:33283766:C_T	6	33283766	T	C	SNV	NON_SYNONYMOUS	7	missense	T	A	ENSG00000236104	ENST00000431845	ZBTB22	310	7.139	k73.9	rs3130100
6:33283766:C_T	6	33283766	T	C	SNV	NON_SYNONYMOUS	7	missense	T	A	ENSG00000236104	ENST00000431845	ZBTB22	310	7.139	k73.7	rs3130100
6:33288271:A_G	6	33288271	A	G	SNV	SYNONYMOUS	5	synonymous	Y	Y	ENSG00000204209	ENST00000374542	DAXX	379	10.59	k73.8	rs1059231
6:33288271:A_G	6	33288271	A	G	SNV	SYNONYMOUS	5	synonymous	Y	Y	ENSG00000204209	ENST00000374542	DAXX	379	10.59	k73.7	rs1059231
6:33288271:A_G	6	33288271	A	G	SNV	SYNONYMOUS	5	synonymous	Y	Y	ENSG00000204209	ENST00000374542	DAXX	379	10.59	k73.9	rs1059231
6:33288271:A_G	6	33288271	A	G	SNV	SYNONYMOUS	5	synonymous	Y	Y	ENSG00000204209	ENST00000374542	DAXX	379	10.59	k73.6	rs1059231
6:33288271:A_G	6	33288271	A	G	SNV	SYNONYMOUS	5	synonymous	Y	Y	ENSG00000204209	ENST00000374542	DAXX	379	10.59	k73.5	rs1059231
6:33408542:A_G	6	33408542	G	A	SNV	SYNONYMOUS	5	synonymous	S	S	ENSG00000197283	ENST00000418600	SYNGAP1	571	3.044	k73.9	rs411136
6:33408542:A_G	6	33408542	G	A	SNV	SYNONYMOUS	5	synonymous	S	S	ENSG00000197283	ENST00000418600	SYNGAP1	571	3.044	k73.7	rs411136
6:33408542:A_G	6	33408542	G	A	SNV	SYNONYMOUS	5	synonymous	S	S	ENSG00000197283	ENST00000418600	SYNGAP1	571	3.044	k73.6	rs411136
6:33408542:A_G	6	33408542	G	A	SNV	SYNONYMOUS	5	synonymous	S	S	ENSG00000197283	ENST00000418600	SYNGAP1	571	3.044	k73.5	rs411136
6:33408542:A_G	6	33408542	G	A	SNV	SYNONYMOUS	5	synonymous	S	S	ENSG00000197283	ENST00000418600	SYNGAP1	571	3.044	k73.8	rs411136
6:33636907:C_T	6	33636907	C	T	SNV	SYNONYMOUS	5	synonymous	H	H	ENSG00000096433	ENST00000374316	ITPR3	721	10.66	k73.9	rs2077163
6:33636907:C_T	6	33636907	C	T	SNV	SYNONYMOUS	5	synonymous	H	H	ENSG00000096433	ENST00000374316	ITPR3	721	10.66	k73.5	rs2077163
6:33636907:C_T	6	33636907	C	T	SNV	SYNONYMOUS	5	synonymous	H	H	ENSG00000096433	ENST00000374316	ITPR3	721	10.66	k73.8	rs2077163
6:33636907:C_T	6	33636907	C	T	SNV	SYNONYMOUS	5	synonymous	H	H	ENSG00000096433	ENST00000374316	ITPR3	721	10.66	k73.6	rs2077163
6:33636907:C_T	6	33636907	C	T	SNV	SYNONYMOUS	5	synonymous	H	H	ENSG00000096433	ENST00000374316	ITPR3	721	10.66	k73.7	rs2077163
6:33641379:C_T	6	33641379	T	C	SNV	SYNONYMOUS	5	synonymous	N	N	ENSG00000096433	ENST00000374316	ITPR3	980	2.519	k73.8	rs1803831
6:33641379:C_T	6	33641379	T	C	SNV	SYNONYMOUS	5	synonymous	N	N	ENSG00000096433	ENST00000374316	ITPR3	980	2.519	k73.7	rs1803831
6:33641379:C_T	6	33641379	T	C	SNV	SYNONYMOUS	5	synonymous	N	N	ENSG00000096433	ENST00000374316	ITPR3	980	2.519	k73.5	rs1803831
6:33641379:C_T	6	33641379	T	C	SNV	SYNONYMOUS	5	synonymous	N	N	ENSG00000096433	ENST00000374316	ITPR3	980	2.519	k73.6	rs1803831
6:33641379:C_T	6	33641379	T	C	SNV	SYNONYMOUS	5	synonymous	N	N	ENSG00000096433	ENST00000374316	ITPR3	980	2.519	k73.9	rs1803831
6:33653448:C_T	6	33653448	C	T	SNV	SYNONYMOUS	5	synonymous	G	G	ENSG00000096433	ENST00000374316	ITPR3	1837	1.603	k73.9	rs749338
6:33653448:C_T	6	33653448	C	T	SNV	SYNONYMOUS	5	synonymous	G	G	ENSG00000096433	ENST00000374316	ITPR3	1837	1.603	k73.8	rs749338
6:33653448:C_T	6	33653448	C	T	SNV	SYNONYMOUS	5	synonymous	G	G	ENSG00000096433	ENST00000374316	ITPR3	1837	1.603	k73.7	rs749338
6:33653448:C_T	6	33653448	C	T	SNV	SYNONYMOUS	5	synonymous	G	G	ENSG00000096433	ENST00000374316	ITPR3	1837	1.603	k73.5	rs749338
6:33653448:C_T	6	33653448	C	T	SNV	SYNONYMOUS	5	synonymous	G	G	ENSG00000096433	ENST00000374316	ITPR3	1837	1.603	k73.6	rs749338
6:33659472:C_G	6	33659472	C	G	SNV	NON_SYNONYMOUS	7	missense	L	V	ENSG00000096433	ENST00000374316	ITPR3	2436	8.424	k73.8	rs2229642
6:33659472:C_G	6	33659472	C	G	SNV	NON_SYNONYMOUS	7	missense	L	V	ENSG00000096433	ENST00000374316	ITPR3	2436	8.424	k73.5	rs2229642
6:33659472:C_G	6	33659472	C	G	SNV	NON_SYNONYMOUS	7	missense	L	V	ENSG00000096433	ENST00000374316	ITPR3	2436	8.424	k73.7	rs2229642
6:33659472:C_G	6	33659472	C	G	SNV	NON_SYNONYMOUS	7	missense	L	V	ENSG00000096433	ENST00000374316	ITPR3	2436	8.424	k73.9	rs2229642
6:33659472:C_G	6	33659472	C	G	SNV	NON_SYNONYMOUS	7	missense	L	V	ENSG00000096433	ENST00000374316	ITPR3	2436	8.424	k73.6	rs2229642
6:33690797:A_G	6	33690797	A	G	SNV	SYNONYMOUS	5	synonymous	S	S	ENSG00000161896	ENST00000451316	IP6K3	311	0.09	k73.9	rs4711341
6:33690797:A_G	6	33690797	A	G	SNV	SYNONYMOUS	5	synonymous	S	S	ENSG00000161896	ENST00000451316	IP6K3	311	0.09	k73.5	rs4711341
6:33690797:A_G	6	33690797	A	G	SNV	SYNONYMOUS	5	synonymous	S	S	ENSG00000161896	ENST00000451316	IP6K3	311	0.09	k73.7	rs4711341
6:33690797:A_G	6	33690797	A	G	SNV	SYNONYMOUS	5	synonymous	S	S	ENSG00000161896	ENST00000451316	IP6K3	311	0.09	k73.6	rs4711341
6:33690797:A_G	6	33690797	A	G	SNV	SYNONYMOUS	5	synonymous	S	S	ENSG00000161896	ENST00000451316	IP6K3	311	0.09	k73.8	rs4711341
6:26056399:A_G	6	26056399	G	A	SNV	SYNONYMOUS	5	synonymous	S	S	ENSG00000187837	ENST00000343677	H1-2	86	7.198	k73.7	rs61748580
6:26056399:A_G	6	26056399	G	A	SNV	SYNONYMOUS	5	synonymous	S	S	ENSG00000187837	ENST00000343677	H1-2	86	7.198	k73.9	rs61748580
6:26056399:A_G	6	26056399	G	A	SNV	SYNONYMOUS	5	synonymous	S	S	ENSG00000187837	ENST00000343677	H1-2	86	7.198	k73.6	rs61748580
6:26056399:A_G	6	26056399	G	A	SNV	SYNONYMOUS	5	synonymous	S	S	ENSG00000187837	ENST00000343677	H1-2	86	7.198	k73.8	rs61748580
6:26056477:A_C	6	26056477	A	C	SNV	SYNONYMOUS	5	synonymous	A	A	ENSG00000187837	ENST00000343677	H1-2	60	2.653	k73.6	rs41266787
6:26056477:A_C	6	26056477	A	C	SNV	SYNONYMOUS	5	synonymous	A	A	ENSG00000187837	ENST00000343677	H1-2	60	2.653	k73.7	rs41266787
6:26056477:A_C	6	26056477	A	C	SNV	SYNONYMOUS	5	synonymous	A	A	ENSG00000187837	ENST00000343677	H1-2	60	2.653	k73.8	rs41266787
6:26056477:A_C	6	26056477	A	C	SNV	SYNONYMOUS	5	synonymous	A	A	ENSG00000187837	ENST00000343677	H1-2	60	2.653	k73.9	rs41266787
6:26104448:A_G	6	26104448	A	G	SNV	SYNONYMOUS	5	synonymous	L	L	ENSG00000197061	ENST00000377803	H4C3	91	9.089	k73.6	rs198852
6:26104448:A_G	6	26104448	A	G	SNV	SYNONYMOUS	5	synonymous	L	L	ENSG00000197061	ENST00000377803	H4C3	91	9.089	k73.8	rs198852
6:26104448:A_G	6	26104448	A	G	SNV	SYNONYMOUS	5	synonymous	L	L	ENSG00000197061	ENST00000377803	H4C3	91	9.089	k73.9	rs198852
6:26104448:A_G	6	26104448	A	G	SNV	SYNONYMOUS	5	synonymous	L	L	ENSG00000197061	ENST00000377803	H4C3	91	9.089	k73.7	rs198852
6:26107790:G_T	6	26107790	G	T	SNV	NON_SYNONYMOUS	7	missense	Q	K	ENSG00000187475	ENST00000338379	H1-6	178	13.67	k73.6	rs198845
6:26107790:G_T	6	26107790	G	T	SNV	NON_SYNONYMOUS	7	missense	Q	K	ENSG00000187475	ENST00000338379	H1-6	178	13.67	k73.9	rs198845
6:26107790:G_T	6	26107790	G	T	SNV	NON_SYNONYMOUS	7	missense	Q	K	ENSG00000187475	ENST00000338379	H1-6	178	13.67	k73.8	rs198845
6:26107790:G_T	6	26107790	G	T	SNV	NON_SYNONYMOUS	7	missense	Q	K	ENSG00000187475	ENST00000338379	H1-6	178	13.67	k73.7	rs198845
6:26124634:C_T	6	26124634	C	T	SNV	SYNONYMOUS	5	synonymous	Y	Y	ENSG00000180573	ENST00000602637	H2AC6	58	12.83	k73.6	rs4645
6:26124634:C_T	6	26124634	C	T	SNV	SYNONYMOUS	5	synonymous	Y	Y	ENSG00000180573	ENST00000602637	H2AC6	58	12.83	k73.9	rs4645
6:26124634:C_T	6	26124634	C	T	SNV	SYNONYMOUS	5	synonymous	Y	Y	ENSG00000180573	ENST00000602637	H2AC6	58	12.83	k73.7	rs4645
6:26124634:C_T	6	26124634	C	T	SNV	SYNONYMOUS	5	synonymous	Y	Y	ENSG00000180573	ENST00000602637	H2AC6	58	12.83	k73.8	rs4645
6:26285560:A_G	6	26285560	A	G	SNV	SYNONYMOUS	5	synonymous	R	R	ENSG00000158406	ENST00000289352	H4C8	56	9.635	k73.6	rs2393592
6:26285560:A_G	6	26285560	A	G	SNV	SYNONYMOUS	5	synonymous	R	R	ENSG00000158406	ENST00000289352	H4C8	56	9.635	k73.7	rs2393592
6:26285560:A_G	6	26285560	A	G	SNV	SYNONYMOUS	5	synonymous	R	R	ENSG00000158406	ENST00000289352	H4C8	56	9.635	k73.8	rs2393592
[truncated: 315 more rows]

## Sheet: Supplementary Table_7
Supplementary Table 7: ABC positive eGFR variants
[truncated: 198 more rows]

[truncated: 11 more sheets: Supplementary Table_8, Supplementary Table_9, Supplementary Table_10, Supplementary Table_11, Supplementary Table_12, Supplementary Table_13, Supplementary Table_14, Supplementary Table_15, Supplementary Table_16, Supplementary Table_17, Supplementary Table_18]
